# Supplementary material for: TGFβ Inhibitor A83-01 Enhances Murine HSPC Expansion for Gene Therapy
Source: Cells. 2023 Jul 31;12(15):1978. doi: 10.3390/cells12151978 (PMC10416825; doi:10.3390/cells12151978)
Supplement: Supplementary file 1 [file cells-12-01978-s001.zip]

Archive with 5 entries (5 files):
- cells-2521517-supplementary Figures S1-S6.pdf
- Supplementary Table S1_media.xlsx
- Supplementary Table S2 Toplist_Genes .xlsx
- Supplementary Table S3_GOBP_M5.xlsx
- Supplementary Table S4_GOBP_M5_filtered.xlsx
