# Supplementary material for: TGFβ Inhibitor A83-01 Enhances Murine HSPC Expansion for Gene Therapy
Source: Cells. 2023 Jul 31;12(15):1978. doi: 10.3390/cells12151978 (PMC10416825; doi:10.3390/cells12151978)
Supplement: Supplementary file 1 [file cells-12-01978-s001.zip › Supplementary Table S1_media.xlsx]

## Sheet: Tabelle1
Table 1: Expansion media composition
	S3F111,2	S3F11T	S3F11+APU3	SFT	STIF4
Basal medium	Iscove's Modified Dulbecco's Medium (Gibco Thermofisher Scientific)			StemSpan™ SFEM (STEMCELL Technologies)
FCS (PAN Biotech)	0.1			-	-
rm SCF (Peprotech)	50 ng/ml			100 ng/ml	100 ng/ml
rm IL-3 (Peprotech)	20 ng/ml			-	-
rh FLT3-L (Peprotech)	100 ng/ml			100 ng/ml
rh IL-11 (Peprotech)	100 ng/ml			-	-
rm TPO (Peprotech)		100 ng/ml		100 ng/ml	100 ng/ml
A83-01 (Tocris)	-	-	1 µM	-	-
Pomalidomide (Selleck Chem)	-	-	2 µM	-	-
UM171 (APExBio)	-	-	35 nM	-	-
rm IGF2 (Peprotech)	-	-	-	-	50 ng/ml
rh FGF1 (Peprotech)	-	-	-	-	25 ng/ml
L-Glutamin (PAN Biotech)	10 ng/ml				10 ng/ml
Heparin (Sigma-Aldrich)	-	-	-	-	10 g/ml
Penicillin/Streptamycin (PANBiotech)	100 U/ml
References for the media
1. Li, Zhixiong et al. “Predictable and efficient retroviral gene transfer into murine bone marrow repopulating cells using a defined vector dose.” Experimental hematology vol. 31,12 (2003): 1206-14. doi:10.1016/j.exphem.2003.08.008 2. Modlich, Ute et al. “Cell-culture assays reveal the importance of retroviral vector design for insertional genotoxicity.” Blood vol. 108,8 (2006): 2545-53. doi:10.…
