# Supplementary material for: TGFβ Inhibitor A83-01 Enhances Murine HSPC Expansion for Gene Therapy
Source: Cells. 2023 Jul 31;12(15):1978. doi: 10.3390/cells12151978 (PMC10416825; doi:10.3390/cells12151978)
Supplement: Supplementary file 1 [file cells-12-01978-s001.zip › Supplementary Table S2 Toplist_Genes .xlsx]

## Sheet: Toplist_Jenni Tue Dec  6 09%3A5
	logFC	AveExpr	t	P.Value	adj.P.Val	B	GeneID_FINAL	Source_FINAL	GeneSymbol_FINAL	GeneName_FINAL	GeneType_FINAL	Sequence	Agilent_eArray_GeneSymbol	Agilent_eArray_GeneName	Agilent_eArray_GenomicCoordinates	Agilent_eArray_GenbankAccession	Agilent_eArray_EntrezGeneID	SYMBOL	1	2	3	4	5	6
A_51_P514029	-9.61899	12.9319	-16.8739	4.00986e-06	0.0015238	5.2656	ENSMUSG00000022225	Gencode.M18_pc	Cma1	chymase 1, mast cell [Source:MGI Symbol;Acc:MGI:96941]	protein_coding	TCACTGTGCGGGAAGGTCTATAACAGTCCTCCTAGGAGCCCATAACAAAACATCTAAAGA	Cma1	chymase 1, mast cell	chr14:56562550-56561491	NM_010780	17228	CMA1	17.7452	17.8787	17.6003	6.79033	8.98013	8.5968
A_51_P145132	-8.98425	10.1768	-46.2595	1.25806e-08	0.000113936	9.2804	ENSMUSG00000061068	Gencode.M18_pc	Mcpt4	mast cell protease 4 [Source:MGI Symbol;Acc:MGI:96940]	protein_coding	TGAAAGATGAATTCTGTGATGATGGACTGTTCCCTGTAATGCACCTCAGTAAAGACCTAA	Mcpt4	mast cell protease 4	chr14:56678648-56678589	NM_010779	17227	MCPT4	14.7629	14.9896	14.2541	5.6238	5.67386	5.75625
A_51_P278653	-8.42695	10.6918	-15.5821	6.2894e-06	0.00167179	4.83579	ENSMUSG00000075334	Gencode.M18_pc	Rprm	reprimo, TP53 dependent G2 arrest mediator candidate [Source:MGI Symbol;Acc:MGI:1915124]	protein_coding	TGTGAATGGGGTAAGTGCTTTCTTTTAGTGCATTTCCAGCTGGGTCTTTATGGGAGGCTA	Rprm	reprimo, TP53 dependent G2 arrest mediator candidate	chr2:53936727-53936668	NM_023396	67874	RPRM	14.8571	15.7219	14.1368	5.57542	7.00301	6.85648
A_55_P2054315	-7.87002	9.0947	-42.0248	2.18374e-08	0.000133829	9.03491	ENSMUSG00000022226	Gencode.M18_pc	Mcpt2	mast cell protease 2 [Source:MGI Symbol;Acc:MGI:96938]	protein_coding	AAGTAGCTGAAAAGCCTAACCAGCCTGAGTCAGACTCTTCAAGATCAAGCTCATCTGGTA	Mcpt2	mast cell protease 2	chr14:56663261-56663320	NM_008571	17225	MCPT2	12.9641	13.3523	12.7727	4.93544	5.17199	5.37165
A_55_P2094262	-7.81934	13.998	-16.4272	4.66699e-06	0.0015734	5.12205	ENSMUSG00000040046	Gencode.M18_pc	Tph1	tryptophan hydroxylase 1 [Source:MGI Symbol;Acc:MGI:98796]	protein_coding	TACTTCTGTTTTGTCTTCTGGAACCTGCTGAGGGAAATATAGTTCACGTGCCACGTGATG	Tph1	tryptophan hydroxylase 1	chr7:53902612-53902553	NM_009414	21990	TPH1	17.8794	18.1292	17.7144	9.02888	10.8948	10.3412
A_55_P2181464	-7.79677	9.29547	-40.8055	2.58599e-08	0.000133829	8.95375	ENSMUSG00000115592	Gencode M18	Mcpt-ps1	mast cell protease, pseudogene 1 [Source:MGI Symbol;Acc:MGI:102769]	transcribed_unprocessed_pseudogene	GGTGGGTTTCTCATAGCCCCACAATTTGTGATGACTGCTGCACACTATAGAGGAAGGTAA	NA	NA	chr14:056570528-056570469	NA	NA	MCPT-PS1	13.1661	13.5256	12.8898	5.2323	5.34134	5.61763
A_52_P8459	-7.68043	8.79403	-12.0695	2.63494e-05	0.0033259	3.39703	ENSMUSG00000024173	Gencode.M18_pc	Tpsab1	tryptase alpha/beta 1 [Source:MGI Symbol;Acc:MGI:96943]	protein_coding	GACTTGAAGTATCACAAAGGTCTCATCACAGGTGACAATGTCCACATTGTCCGAGATGAC	Tpsab1	tryptase alpha/beta 1	chr17:25480699-25480640	NM_031187	100503895	TPSAB1	12.9026	11.2057	13.7944	4.91309	4.93222	5.01613
A_52_P599317	-7.51156	10.928	-26.6364	2.98114e-07	0.000410665	7.45919	ENSMUSG00000062184	Gencode.M18_pc	Hs6st2	heparan sulfate 6-O-sulfotransferase 2 [Source:MGI Symbol;Acc:MGI:1354959]	protein_coding	CAAGAGGGACATGCTTAGAAATATGATCATAAAGTCACATCTGTCATAGTCTGCCCAAGT	Hs6st2	heparan sulfate 6-O-sulfotransferase 2	chrX:48741078-48741019	NM_001077202	50786	HS6ST2	14.506	15.2499	14.2954	7.48581	7.05612	6.97472
A_55_P2364768	-7.27154	8.48339	-54.3504	4.98169e-09	9.02333e-05	9.62974	ENSMUSG00000115592	Gencode M18	Mcpt-ps1	mast cell protease, pseudogene 1 [Source:MGI Symbol;Acc:MGI:102769]	transcribed_unprocessed_pseudogene	TCTGAACCTTGGAGGATCTCAAAAATACACAAGTCTGTGATGATGGACTGTTCCCTGTAA	Mcpt-ps1	mast cell protease, pseudogene 1	chr14:56568705-56568646	NR_028284	17223	MCPT-PS1	12.1072	12.3576	11.8926	4.9091	4.87786	4.7559
A_52_P278354	-7.21898	10.4876	-21.6997	9.60759e-07	0.000796106	6.53927	ENSMUSG00000008999	Gencode.M18_pc	Bmp7	bone morphogenetic protein 7 [Source:MGI Symbol;Acc:MGI:103302]	protein_coding	GCTGGCGTCTGTGTTGAAGGGAAACCAAGCAGAAGCCACTGTAATGATATGTCACAATAA	Bmp7	bone morphogenetic protein 7	chr2:172695262-172695203	NM_007557	12162	BMP7	14.2632	13.9918	14.0362	6.72517	7.60474	6.30443
A_55_P1995243	-7.11408	11.0113	-12.5856	2.08634e-05	0.00306057	3.63783	ENSMUSG00000020173	Gencode.M18_pc	Cobl	cordon-bleu WH2 repeat [Source:MGI Symbol;Acc:MGI:105056]	protein_coding	TTAGTCACAGCTGTCTGCTCTTTCTCTTAGTGCCACAAATAAATGCAAATCCAATGCTGT	Cobl	cordon-bleu WH2 repeat	chr11:12136740-12136681	NM_172496	12808	COBL	14.9299	14.7966	13.9787	6.24495	8.09583	8.02208
A_52_P281702	-6.83687	13.4356	-7.2102	0.000433436	0.0130894	0.383316	ENSMUSG00000026185	Gencode.M18_pc	Igfbp5	insulin-like growth factor binding protein 5 [Source:MGI Symbol;Acc:MGI:96440]	protein_coding	CACATCACATATTACTGTAGCTCTCTATAGTGTTACGTTCAGACACCGTAGCTCTGTCCT	Igfbp5	insulin-like growth factor binding protein 5	chr1:72904888-72904829	NM_010518	16011	IGFBP5	17.2003	16.0325	17.3293	7.90671	11.1989	10.9459
A_55_P1974487	-6.71323	10.3795	-7.18972	0.000439964	0.013172	0.36681	ENSMUSG00000028457	Gencode.M18_pc	Atp8b5	ATPase, class I, type 8B, member 5 [Source:MGI Symbol;Acc:MGI:2444287]	protein_coding	GTACTTTGTATGTACTTGCGCAACTGTTTCTAAGACATTTGTGGAGAAATAAACGAAGAA	Atp8b5	ATPase, class I, type 8B, member 5	chr4:43386627-43386686	NM_177195	320571	ATP8B5	13.5679	15.2619	12.3787	5.5446	7.8647	7.65949
A_51_P258721	-6.6742	12.7859	-13.9613	1.16712e-05	0.00229783	4.22689	ENSMUSG00000033200	Gencode.M18_pc	Tpsg1	tryptase gamma 1 [Source:MGI Symbol;Acc:MGI:1349391]	protein_coding	ACTCTGAATGAGGTGTAGCAACCAACCCAAGTGTCTTTCTTAAATAAGTTAGTGTTTATT	Tpsg1	tryptase gamma 1	chr17:25511199-25511258	NM_012034	26945	TPSG1	16.3952	16.0942	15.8796	8.49685	10.3978	9.45165
A_52_P63905	-6.63313	8.61689	-17.8425	2.92292e-06	0.00133634	5.55995	ENSMUSG00000020182	Gencode.M18_pc	Ddc	dopa decarboxylase [Source:MGI Symbol;Acc:MGI:94876]	protein_coding	CCACGGCTAGCTCATACCCAGCTATGCTTGCAGACATGCTGTGTGGTGCTATTGGCTGCA	Ddc	dopa decarboxylase	chr11:11776321-11776262	NM_016672	13195	DDC	11.7418	12.7712	11.2874	5.26032	5.28572	5.35494
A_51_P302566	-6.59784	12.03	-16.8673	4.01871e-06	0.0015238	5.26352	ENSMUSG00000040147	Gencode.M18_pc	Maob	monoamine oxidase B [Source:MGI Symbol;Acc:MGI:96916]	protein_coding	CTTGCATCTTCTAGTTAGTCTGCTTCCATTCAAAGATTAAGACATGCTTAGGTAATTAAC	Maob	monoamine oxidase B	chrX:16286486-16286427	NM_172778	109731	MAOB	15.4818	16.0377	14.4672	8.63048	8.7309	8.83175
A_55_P2110497	-6.37531	10.3442	-23.1707	6.60977e-07	0.000665127	6.84644	ENSMUSG00000020182	Gencode.M18_pc	Ddc	dopa decarboxylase [Source:MGI Symbol;Acc:MGI:94876]	protein_coding	TGGCTGTTAACTTATCCTCTGTGTGGCTAAATACTAAATAAACAACCTATGTGCAATACT	Ddc	dopa decarboxylase	chr11:11714165-11714106	NM_001190448	13195	DDC	13.5795	14.0579	12.9582	7.2295	7.16908	7.0711
A_55_P2006327	-6.1702	10.2481	-16.9092	3.96269e-06	0.0015238	5.27673	ENSMUSG00000021745	Gencode.M18_pc	Ptprg	protein tyrosine phosphatase, receptor type, G [Source:MGI Symbol;Acc:MGI:97814]	protein_coding	TATAAGTAGTACCTTCGAACTGATCAATGTCATCAAGGAAGAGGCCTTAACCCGGGATGG	Ptprg	protein tyrosine phosphatase, receptor type, G	chr14:13058888-13058947	NM_008981	19270	PTPRG	13.3584	13.6243	13.0169	6.393	7.69338	7.40265
A_55_P2078370	-6.13046	7.90327	-7.64374	0.000318391	0.0111764	0.723243	ENSMUSG00000051079	Gencode.M18_pc	Rgs13	regulator of G-protein signaling 13 [Source:MGI Symbol;Acc:MGI:2180585]	protein_coding	GACACCTTATTGTACCTTACTATGAACATTTCAAAAGGCCCAAAGTTTGCAAAAGTGAAA	Rgs13	regulator of G-protein signaling 13	chr1:145985883-145985824	NM_153171	246709	RGS13	10.9948	12.6124	9.29829	4.97756	4.79568	4.74088
A_55_P2039842	-6.06048	8.52131	-21.614	9.82653e-07	0.000796106	6.52038	ENSMUSG00000035615	Gencode.M18_pc	Frmpd1	FERM and PDZ domain containing 1 [Source:MGI Symbol;Acc:MGI:2446274]	protein_coding	AACTCACCTGTGAGAGAGGCTACCATGACTTCAGCGTGAAACTCTTGGCCCGCCAGTGCA	Frmpd1	FERM and PDZ domain containing 1	chr4:45298581-45298640	NM_001081172	666060	FRMPD1	12.1264	11.5301	10.9981	5.56402	5.4743	5.43488
A_55_P2000027	-5.95514	10.8516	-33.5685	7.92707e-08	0.00024776	8.34368	ENSMUSG00000053030	Gencode.M18_pc	Spink2	serine peptidase inhibitor, Kazal type 2 [Source:MGI Symbol;Acc:MGI:1917232]	protein_coding	AACTTATGACCCAGGCGACTTTTGCATCGCTTTATTTCATTGGAATAAAATGAGCATTGA	Spink2	serine peptidase inhibitor, Kazal type 2	chr5:77634196-77634137	NM_183284	69982	SPINK2	14.0428	13.6658	13.7791	8.18938	7.80218	7.63063
A_55_P2285782	-5.92519	8.62139	-31.4049	1.16133e-07	0.000300501	8.10665	NA	Agilent eArray	A630038E17Rik	RIKEN cDNA A630038E17 gene	NA	TCAGGGTAGAGGACATTTGTCTAACTACATCTCTATTGCAAAAATAAATATTTCTCGGCC	A630038E17Rik	RIKEN cDNA A630038E17 gene	chr14:54707104-54707163	AK039976	219065	A630038E17RIK	11.3519	11.9667	11.4333	5.7892	5.70708	5.48009
A_52_P565575	-5.71939	8.89165	-56.9524	3.80719e-09	9.02333e-05	9.71733	ENSMUSG00000053199	Gencode.M18_pc	Arhgap20	Rho GTPase activating protein 20 [Source:MGI Symbol;Acc:MGI:2445175]	protein_coding	GAGCTACTCCCCTAGTCCAAAAGTTTCCTAAAGTCTATGTGATCTCTTGAATCCCTGTTT	Arhgap20	Rho GTPase activating protein 20	chr9:51660224-51660283	NM_175535	244867	ARHGAP20	11.6218	11.713	11.9192	5.9694	6.03439	6.09206
A_55_P2089143	-5.69914	10.2706	-9.11526	0.000123618	0.00690803	1.75631	ENSMUSG00000033825	Gencode.M18_pc	Tpsb2	tryptase beta 2 [Source:MGI Symbol;Acc:MGI:96942]	protein_coding	TTTTCCCATTGTCCATGATGGCATGCTGTGTGCTGGAAATACCAGGAGAGACTCCTGCCA	Tpsb2	tryptase beta 2	chr17:25504493-25504552	NM_010781	17229	TPSB2	13.4434	12.6043	13.3129	6.13385	8.53929	7.59002
A_52_P229052	-5.67852	7.69512	-12.6612	2.01772e-05	0.00302041	3.67215	ENSMUSG00000026109	Gencode.M18_pc	Tmeff2	transmembrane protein with EGF-like and two follistatin-like domains 2 [Source:MGI Symbol;Acc:MGI:1861735]	protein_coding	TGTCCGGTTCCAGTACGTCTTGATTGCAGCTGTGATTGGAACAATTCAGATTGCTGTCAT	Tmeff2	transmembrane protein with EGF-like and two follistatin-like domains 2	chr1:51238653-51238712	NM_019790	56363	TMEFF2	10.165	11.5758	9.86235	4.75366	4.99651	4.81742
A_52_P920129	-5.65703	7.50374	-12.1704	2.51556e-05	0.00323561	3.44503	ENSMUSG00000057614	Gencode.M18_pc	Gnai1	guanine nucleotide binding protein (G protein), alpha inhibiting 1 [Source:MGI Symbol;Acc:MGI:95771]	protein_coding	ACCCACATTGCGAAGCTATGTATGAAATTCAAGTATACTCTGGATAAATTTGAATGGTGA	Gnai1	guanine nucleotide binding protein (G protein), alpha inhibiting 1	chr5:17771136-17771077	NM_010305	14677	GNAI1	9.37381	11.2842	10.3387	4.73066	4.69074	4.60426
A_51_P136411	-5.64637	8.18026	-29.4932	1.66413e-07	0.000327488	7.86993	ENSMUSG00000038665	Gencode.M18_pc	Dgki	diacylglycerol kinase, iota [Source:MGI Symbol;Acc:MGI:2443430]	protein_coding	CTGTACCTCACGATTCTACTGTAACCACCCATCGATTTAGAAACTATGCTTTCGTCTCTT	Dgki	diacylglycerol kinase, iota	chr6:36797014-36796955	NM_001081206	320127	DGKI	10.9161	11.4083	10.6859	5.27444	5.37848	5.4183
A_55_P1960386	-5.63564	8.00703	-16.8755	4.00776e-06	0.0015238	5.26609	ENSMUSG00000020702	Gencode.M18_pc	Ccl1	chemokine (C-C motif) ligand 1 [Source:MGI Symbol;Acc:MGI:98258]	protein_coding	CTCACAGACCTCAGTCATGTGATAAGCTATGTTATGGTTCTTTATCTGTTTAAAATATGG	Ccl1	chemokine (C-C motif) ligand 1	chr11:81990227-81990168	NM_011329	20290	CCL1	10.5261	10.3461	11.6024	5.12936	5.1889	5.24938
A_55_P2142499	-5.59704	8.166	-6.91778	0.000538404	0.0147647	0.143645	ENSMUSG00000103254	Gencode.M18_pc	Ighv1-15	immunoglobulin heavy variable 1-15 [Source:MGI Symbol;Acc:MGI:4439782]	IG_V_gene	TATTGATCCTGAAACTGGTGGTACTGCCTACAATCAGAAGTTCAAGGGCAAGGCCATACT	NA	NA	chr12:115895708-115895649	KY199172	NA	IGHV1-15	11.5722	12.2111	9.11026	4.98055	5.69408	5.42782
A_55_P2075510	-5.58112	8.54776	-6.9752	0.000515656	0.0144071	0.191395	ENSMUSG00000103254	Gencode.M18_pc	Ighv1-15	immunoglobulin heavy variable 1-15 [Source:MGI Symbol;Acc:MGI:4439782]	IG_V_gene	TATTGATCCTGAAACTTGTGGTACTGCCTACAATCAGAAGTTCAAGGGCAAGGCCACACT	NA	NA	chr12:116002805-116002746	KY199178	NA	IGHV1-15	11.9244	12.5771	9.51346	5.32074	6.01636	5.9345
A_52_P110052	-5.56882	10.7141	-13.4714	1.42606e-05	0.00253237	4.02542	ENSMUSG00000037872	Gencode.M18_pc	Ackr1	atypical chemokine receptor 1 (Duffy blood group) [Source:MGI Symbol;Acc:MGI:1097689]	protein_coding	GTTCATTTTCTGGTGGCCTCATGGGATGGTTCTCATATTTGATGCTTTGGTGAGGTCCAA	Ackr1	atypical chemokine receptor 1 (Duffy blood group)	chr1:175262341-175262282	NM_010045	13349	ACKR1	13.0491	14.4717	12.9749	7.89203	7.85494	8.04217
A_51_P298066	-5.51965	10.6161	-8.5354	0.000176432	0.00835803	1.36981	ENSMUSG00000039315	Gencode.M18_pc	Clnk	cytokine-dependent hematopoietic cell linker [Source:MGI Symbol;Acc:MGI:1351468]	protein_coding	GGCTCAATGGATTCAGTTCTTCTTCCATCTGCATTTATCTCAAAGTATTATTTTCTGTGT	Clnk	cytokine-dependent hematopoietic cell linker	chr5:39097787-39097728	NM_013748	27278	CLNK	13.2521	14.7131	12.1627	8.13233	8.02628	7.41028
A_55_P1976037	-5.50567	9.973	-13.8608	1.21542e-05	0.00235453	4.18627	ENSMUSG00000096230	Gencode.M18_pc	Gm16429	predicted gene 16429 [Source:MGI Symbol;Acc:MGI:3704105]	protein_coding	GGGACAGATTAACTAGATCCTTTGTCATGGACTTGTAAACTTTTTGTTCTTCACTGTAAT	A430089I19Rik	RIKEN cDNA A430089I19 gene	chr5:94731635-94731576	NM_177913	331195	GM16429	12.3328	13.5239	12.3208	7.01906	6.92469	7.71675
A_55_P2007964	-5.36219	8.72334	-15.3351	6.88244e-06	0.00170771	4.74832	ENSMUSG00000052336	Gencode.M18_pc	Cx3cr1	chemokine (C-X3-C motif) receptor 1 [Source:MGI Symbol;Acc:MGI:1333815]	protein_coding	CGTGCCTAGAGTGTGTCTATCCCACTTGTAATTCTGTCAATAAACATTGGTTTCCTTCCA	Cx3cr1	chemokine (C-X3-C motif) receptor 1	chr9:119957870-119957811	NM_009987	13051	CX3CR1	11.5914	11.9837	10.6383	6.08337	5.8442	6.19915
A_55_P1992976	-5.34695	9.90496	-14.8865	8.13605e-06	0.00185331	4.5847	ENSMUSG00000072822	Gencode.M18_pc	BC061212	cDNA sequence BC061212 [Source:MGI Symbol;Acc:MGI:2681870]	protein_coding	TGACATGGGGAGCAGACTTGTGGACTGACAAAGGCAACTTGGATGTTTTGAATTGACTCT	A430089I19Rik	RIKEN cDNA A430089I19 gene	chr5:94731698-94731639	NM_177913	331195	BC061212	12.164	13.2742	12.2971	7.01733	6.96608	7.71106
A_55_P2054362	-5.33994	8.36172	-14.7489	8.57273e-06	0.00190525	4.53327	ENSMUSG00000052336	Gencode.M18_pc	Cx3cr1	chemokine (C-X3-C motif) receptor 1 [Source:MGI Symbol;Acc:MGI:1333815]	protein_coding	CTAGAGTGTGTCTATCCCACTTGTAATTCTGTCAATAAACATTGGTTTCCTTCCAGCTCT	Cx3cr1	chemokine (C-X3-C motif) receptor 1	chr9:119957865-119957806	NM_009987	13051	CX3CR1	11.1903	11.6602	10.2446	5.74127	5.49976	5.83421
A_51_P433870	-5.32201	11.0045	-22.3592	8.10013e-07	0.000733589	6.68091	ENSMUSG00000031520	Gencode.M18_pc	Vegfc	vascular endothelial growth factor C [Source:MGI Symbol;Acc:MGI:109124]	protein_coding	TCTGTGTTTATTGAACCATGTGGATTACTGCGGGAGAGGACTGGCACTCATGTGCAAAAA	Vegfc	vascular endothelial growth factor C	chr8:55271533-55271592	NM_009506	22341	VEGFC	13.7508	13.9962	13.2496	8.21177	8.67454	8.14427
A_55_P2072513	-5.31893	8.0987	-32.9032	8.89107e-08	0.00024776	8.274	ENSMUSG00000076867	Gencode.M18_pc	Trdv4	T cell receptor delta variable 4 [Source:MGI Symbol;Acc:MGI:4887419]	TR_V_gene	ACTCGACATTCAGAAGGCAACAATGAAAGACGCTGGTACGTACTACTGTGGGTCAGATAT	NA	NA	chr14:54695130-54695189	M37288	NA	TRDV4	10.4808	10.9148	10.8789	5.60562	5.48829	5.22379
A_66_P106611	-5.27732	9.02477	-13.0172	1.728e-05	0.00273356	3.83058	ENSMUSG00000024697	Gencode.M18_pc	Gna14	guanine nucleotide binding protein, alpha 14 [Source:MGI Symbol;Acc:MGI:95769]	protein_coding	TGCCTTTCTGGATACTAAGAATACACTGTTCTACCCTGAACACCAACGATGATGTGCTTC	Gna14	guanine nucleotide binding protein, alpha 14	chr19:16685197-16685256	NM_008137	14675	GNA14	11.6276	12.4614	10.9012	6.05203	6.54436	6.56194
A_55_P2078143	-5.22482	8.24578	-13.1694	1.6192e-05	0.00264222	3.89674	ENSMUSG00000051596	Gencode.M18_pc	Otop1	otopetrin 1 [Source:MGI Symbol;Acc:MGI:2388363]	protein_coding	CACCAGCACTCACATGCAAGAGTGTGCTACCCCCATGAATAATAAAAAATAATAATAATA	Otop1	otopetrin 1	chr5:38695380-38695439	NM_172709	21906	OTOP1	10.3856	11.7899	10.3992	5.53474	5.61249	5.75288
A_51_P290921	-5.13355	8.10163	-12.1174	2.57741e-05	0.00326466	3.4199	ENSMUSG00000030616	Gencode.M18_pc	Sytl2	synaptotagmin-like 2 [Source:MGI Symbol;Acc:MGI:1933366]	protein_coding	TGACGAATTTACTTAGTAACCTCTAATGAAACATTGAATTCCATGTTAGGGCAGTAAGAC	Sytl2	synaptotagmin-like 2	chr7:97558507-97558566	NM_001040087	83671	SYTL2	10.8529	11.42	9.73233	5.55243	5.67035	5.38177
A_52_P307904	-5.12269	9.14967	-6.91552	0.000539324	0.0147788	0.141757	ENSMUSG00000022755	Gencode.M18_pc	Adgrg7	adhesion G protein-coupled receptor G7 [Source:MGI Symbol;Acc:MGI:2441732]	protein_coding	TGTGGTCGTTCATCATACCTGTAACCATTATCCTCATCACCAACATTACTATATTTGTCA	Adgrg7	adhesion G protein-coupled receptor G7	chr16:56732984-56732925	NM_172825	239853	ADGRG7	12.0586	12.9511	10.1233	6.81989	5.99986	6.94522
A_51_P391934	-5.04177	8.39749	-6.71967	0.000626296	0.0159355	-0.0237553	ENSMUSG00000011463	Gencode.M18_pc	Cpb1	carboxypeptidase B1 (tissue) [Source:MGI Symbol;Acc:MGI:1923953]	protein_coding	TTAAAATTCTTACTGTTCATTCCTTGTCTGATGTGACTCCGTTTGTTTGGAGGTTTGCAG	Cpb1	carboxypeptidase B1 (tissue)	chr3:20149526-20149467	NM_029706	76703	CPB1	11.4254	12.1526	9.17715	5.77017	5.91376	5.94589
A_55_P2127243	-5.01723	10.3771	-12.365	2.30265e-05	0.0031597	3.53634	ENSMUSG00000033825	Gencode.M18_pc	Tpsb2	tryptase beta 2 [Source:MGI Symbol;Acc:MGI:96942]	protein_coding	GGGCTGTGCTGTCTTTAACTCACTGCTTCCTGGTCAGGTGGAACCCTTGCCTTCCTTGTC	Tpsb2	tryptase beta 2	chr17:25504819-25504878	NM_010781	17229	TPSB2	13.2492	12.3395	13.0685	7.18623	8.5465	7.8727
A_52_P99810	-4.99728	7.72292	-11.2038	3.98371e-05	0.0040595	2.96561	ENSMUSG00000052336	Gencode.M18_pc	Cx3cr1	chemokine (C-X3-C motif) receptor 1 [Source:MGI Symbol;Acc:MGI:1333815]	protein_coding	CAAGAATGTCTTCATGCATTCACTGACTCCGGTCTCATTTGCAGGCTTACATTGAAAGTT	Cx3cr1	chemokine (C-X3-C motif) receptor 1	chr9:119959077-119959018	NM_009987	13051	CX3CR1	10.3598	11.0331	9.27178	4.97912	5.25894	5.43477
A_55_P1955583	-4.98475	9.00131	-16.0049	5.40714e-06	0.00164204	4.98146	ENSMUSG00000072822	Gencode.M18_pc	BC061212	cDNA sequence BC061212 [Source:MGI Symbol;Acc:MGI:2681870]	protein_coding	TCTCTTTTGCTACACGTATATGCCACAAATGTGGTGAGTGCTGTGTCTATGGCAAGAGAG	Gm7978	predicted gene 7978	chr5:94495612-94495553	NM_001270457	666203	BC061212	11.1927	12.122	11.1663	6.61879	6.14248	6.76555
A_66_P114435	-4.97027	8.58027	-15.964	5.4858e-06	0.00164204	4.9676	ENSMUSG00000096230	Gencode.M18_pc	Gm16429	predicted gene 16429 [Source:MGI Symbol;Acc:MGI:3704105]	protein_coding	GAGAAAGGACTCCCTACATTTGTGCTGTATAAACATGAAGATCTGGGCTATGCCCGTGGA	Gm7978	predicted gene 7978	chr5:94497354-94497295	NM_001270457	666203	GM16429	10.8454	11.7752	10.5756	6.10479	6.01332	6.16731
A_55_P2012349	-4.96323	7.69846	-48.9651	9.0752e-09	0.000109586	9.4123	ENSMUSG00000037712	Gencode.M18_pc	Fermt2	fermitin family member 2 [Source:MGI Symbol;Acc:MGI:2385001]	protein_coding	GGGGTGGACTTACCAGTATTGTCCAATAATCCATGAATTAAAGACTGTATAAATGCATTT	Fermt2	fermitin family member 2	chr14:46078561-46078502	NM_146054	218952	FERMT2	10.0311	10.2732	10.236	5.13385	5.18331	5.33337
A_55_P2181928	-4.94549	10.0776	-7.92851	0.000262066	0.0101304	0.9371	ENSMUSG00000026435	Gencode.M18_pc	Slc45a3	solute carrier family 45, member 3 [Source:MGI Symbol;Acc:MGI:1922082]	protein_coding	TATGTGATAAATCAGAGTATAATGTTTATGGTGATGAAATTAAAAGCTTCGTATATGTTT	Slc45a3	solute carrier family 45, member 3	chr1:133879481-133879540	NM_145977	212980	SLC45A3	12.5028	13.8411	11.3072	7.8275	7.35287	7.63433
A_51_P169476	-4.89413	7.77464	-15.0748	7.57988e-06	0.00177154	4.65412	ENSMUSG00000022227	Gencode.M18_pc	Mcpt1	mast cell protease 1 [Source:MGI Symbol;Acc:MGI:96937]	protein_coding	AATCTCTGCATATGTGCCCTGGATTAAAACAGTCATAAATGGCAAGTAGCTGAGAAGTCT	Mcpt1	mast cell protease 1	chr14:56638928-56638987	NM_008570	17224	MCPT1	10.1406	9.62765	10.8968	5.19569	5.25943	5.52761
A_52_P620448	-4.83753	8.9527	-12.1881	2.49527e-05	0.00323433	3.45341	ENSMUSG00000056947	Gencode.M18_pc	Mab21l1	mab-21-like 1 (C. elegans) [Source:MGI Symbol;Acc:MGI:1333773]	protein_coding	GAGACAGTGCAAACAATCTCTTCCTTTAAAAGGAGTAACAACACAACATTTAACCATCAT	Mab21l1	mab-21-like 1 (C. elegans)	chr3:55588091-55588150	NM_010750	17116	MAB21L1	11.4673	12.0999	10.5472	6.59939	6.727	6.27543
A_51_P336599	-4.79268	10.8071	-16.3935	4.72162e-06	0.0015734	5.11098	ENSMUSG00000035165	Gencode.M18_pc	Kcne3	potassium voltage-gated channel, Isk-related subfamily, gene 3 [Source:MGI Symbol;Acc:MGI:1891124]	protein_coding	GAACTCAACTCAACCATATCAAGCCACAGTGTATCTATGTAAGATCAACAGGAAACTGGT	Kcne3	potassium voltage-gated channel, Isk-related subfamily, gene 3	chr7:107333062-107333121	NM_020574	57442	KCNE3	13.1719	13.5787	12.8599	8.758	7.87359	8.60083
A_55_P2139942	-4.77932	12.6671	-7.19225	0.000439152	0.0131586	0.368851	ENSMUSG00000030669	Gencode.M18_pc	Calca	calcitonin/calcitonin-related polypeptide, alpha [Source:MGI Symbol;Acc:MGI:2151253]	protein_coding	AAGAATGGTATCTGAAATCCCCAGTGGGTGAGGAGAAAGTCCCACAGGCTAAAAGAGAAT	Calca	calcitonin/calcitonin-related polypeptide, alpha	chr7:121777007-121776948	NM_001305616	12310	CALCA	15.1471	15.2921	14.731	8.80454	10.591	11.4367
A_55_P2059010	-4.76686	9.1954	-6.87614	0.000555628	0.0150451	0.108803	ENSMUSG00000046402	Gencode.M18_pc	Rbp1	retinol binding protein 1, cellular [Source:MGI Symbol;Acc:MGI:97876]	protein_coding	TGCCTGGTCTCTTTTCCTTTTCTTAAAATGAAGCGACCCCAATAAAAGTGATCTCTGTTT	Rbp1	retinol binding protein 1, cellular	chr9:98346908-98346967	NM_011254	19659	RBP1	12.1516	9.94861	12.6363	6.76427	6.91024	6.7614
A_55_P2108708	-4.73544	10.7433	-16.3787	4.74581e-06	0.0015734	5.10612	ENSMUSG00000035165	Gencode.M18_pc	Kcne3	potassium voltage-gated channel, Isk-related subfamily, gene 3 [Source:MGI Symbol;Acc:MGI:1891124]	protein_coding	TATTCTCTTTGTCATGTTCCTATTTGCCGTCACTGTGGGCAGTCTCATCCTGGGATATAC	Kcne3	potassium voltage-gated channel, Isk-related subfamily, gene 3	chr7:107332867-107332926	NM_001190870	57442	KCNE3	13.0075	13.5306	12.7951	8.65646	7.85832	8.612
A_55_P1992084	-4.72567	8.72502	-17.8243	2.93993e-06	0.00133634	5.55461	ENSMUSG00000021745	Gencode.M18_pc	Ptprg	protein tyrosine phosphatase, receptor type, G [Source:MGI Symbol;Acc:MGI:97814]	protein_coding	GGGGGAGGGGTTTTATAACCTGAAATTTTTTCCCTTTTTCCTTCTGTTTAAAACTATATC	Ptprg	protein tyrosine phosphatase, receptor type, G	chr14:13074419-13074478	NM_008981	19270	PTPRG	11.001	11.5303	10.7323	5.96976	6.63986	6.47695
A_55_P2185722	-4.71384	7.49694	-41.2097	2.44369e-08	0.000133829	8.98123	ENSMUSG00000037712	Gencode.M18_pc	Fermt2	fermitin family member 2 [Source:MGI Symbol;Acc:MGI:2385001]	protein_coding	GTGGTTGGGTGTGAATAGGAAAACTTGTAATAAAACTCCACAGCCATAACAATATTTAAC	Fermt2	fermitin family member 2	chr14:46079538-46079479	NM_146054	218952	FERMT2	9.75806	10.0171	9.78646	4.9811	5.24779	5.19119
A_52_P279425	-4.60409	11.8415	-13.4434	1.44278e-05	0.0025406	4.01364	ENSMUSG00000022657	Gencode.M18_pc	Cd96	CD96 antigen [Source:MGI Symbol;Acc:MGI:1934368]	protein_coding	TCTTTTTCTGCACACTATTGTTTGGGCTTGGAGTAAGAAAATGGTATCGGTATCAAAATG	Cd96	CD96 antigen	chr16:46038619-46038560	NM_032465	84544	CD96	14.2051	14.3527	13.8728	9.15266	9.16945	10.2962
A_51_P174275	-4.56925	9.65374	-9.45402	0.000101346	0.00617037	1.97093	ENSMUSG00000036655	Gencode.M18_pc	Colec11	collectin sub-family member 11 [Source:MGI Symbol;Acc:MGI:1918943]	protein_coding	ATTATGGCTAACCACTCGGAAGGATGCTGTGAAGCTCTTGTCTTGGTCCAGCATAGTAAA	Colec11	collectin sub-family member 11	chr12:29279299-29279240	NM_027866	71693	COLEC11	11.6983	12.2295	11.8873	6.66712	6.97836	8.46188
A_55_P2258757	-4.556	8.08747	-8.78015	0.000151451	0.00770588	1.536	ENSMUSG00000086391	Gencode M18	1700042O10Rik	RIKEN cDNA 1700042O10 gene [Source:MGI Symbol;Acc:MGI:1920571]	antisense	CTGTTCCACTGTTGTCATTTGGTAACCGAGAATAAGTGAATAAATAAATGAATGAATCCG	1700042O10Rik	RIKEN cDNA 1700042O10 gene	chr11:11785261-11785320	NR_045178	73321	1700042O10RIK	10.0695	11.5514	9.4755	5.74846	5.86295	5.81701
A_55_P2170454	-4.5259	12.2215	-11.72	3.10277e-05	0.003557	3.22719	ENSMUSG00000057933	Gencode.M18_pc	Gsta2	glutathione S-transferase, alpha 2 (Yc2) [Source:MGI Symbol;Acc:MGI:95863]	protein_coding	GCCACAGATACTGGCCTCTAATTGTTTGCAATTATAAAATACAATTGTTGATTCTGGCTA	Gsta2	glutathione S-transferase, alpha 2 (Yc2)	chr9:78178915-78178856	NM_008182	14858	GSTA2	13.9615	14.5187	14.973	9.25535	10.3098	10.3104
A_55_P2119687	-4.52454	9.59814	-14.5059	9.41262e-06	0.00201764	4.44097	ENSMUSG00000105439	Gencode M18	A230098N10Rik	RIKEN cDNA A230098N10 gene [Source:MGI Symbol;Acc:MGI:2141280]	lincRNA	GTACGCCTACACTCCCATTCATGTGCACACATATATACACACATACATATAATTTAAACA	NA	NA	chr5:30322750-30322691	W17435	NA	A230098N10RIK	11.8678	12.0886	11.6248	6.84698	7.99327	7.16736
A_55_P2106763	-4.50152	7.8319	-18.9443	2.08041e-06	0.00114189	5.86897	ENSMUSG00000021411	Gencode.M18_pc	Pxdc1	PX domain containing 1 [Source:MGI Symbol;Acc:MGI:1914145]	protein_coding	CTTTTACACAGTCTGTTTTTAATCTATTTTAATTAAATAAAAATCTATTGTTCTACTTTG	Pxdc1	PX domain containing 1	chr13:34719769-34719710	NM_025831	66895	PXDC1	10.4203	10.1807	9.64688	5.3491	5.87072	5.52359
A_51_P499551	-4.49394	8.96298	-15.2981	6.97678e-06	0.00170771	4.73506	ENSMUSG00000035914	Agilent eArray	Cd276	CD276 antigen	protein_coding	AGAGACCTACTTCCAGTGTACTCCAACAACAGGCGTGAGCATGGTGCTGGGTACTAGGGT	Cd276	CD276 antigen	chr9:58372150-58372107	NM_133983	102657	CD276	11.4405	11.5855	10.6039	6.4748	7.01483	6.6584
A_55_P1961127	-4.49245	7.94702	-7.26263	0.000417229	0.0129074	0.425377	ENSMUSG00000000031	Gencode M18	H19	H19, imprinted maternally expressed transcript [Source:MGI Symbol;Acc:MGI:95891]	lincRNA	TAGTCTGGAAGCAGTTCCATCATAAAGTGTTCAACATGCCCTACTTCATCCTTTGCCCCT	H19	H19, imprinted maternally expressed transcript	chr7:149761551-149761492	NR_130973	14955	H19	10.7968	11.0538	8.7292	5.57676	5.74223	5.7834
A_55_P2102065	-4.44791	11.244	-11.1883	4.01428e-05	0.0040595	2.95758	ENSMUSG00000074179	Gencode.M18_pc	Gm10639	predicted gene 10639 [Source:MGI Symbol;Acc:MGI:3704339]	protein_coding	GCCACAGATACTGGCCTCTAATGGTTTGCAATTATAAAATACAATTGTTGATTTGGCTAT	Gm10639	predicted gene 10639	chr9:78153243-78153302	NM_001122660	100042314	GM10639	12.8741	13.5437	13.9861	8.33441	9.36068	9.36515
A_66_P126640	-4.4106	7.26189	-11.7761	3.02152e-05	0.00353814	3.25484	ENSMUSG00000041261	Agilent eArray	Car8	carbonic anhydrase 8	protein_coding	TTAGCACTCCTTTATAGTGACCTAATTACATTTTCTGATGTTTTGTTGTTGTGTTAATAA	Car8	carbonic anhydrase 8	chr4:8068716-8068657	NM_007592	12319	CAR8	9.38236	10.2735	8.74572	5.07594	5.05641	5.03743
A_55_P2135526	-4.39334	9.49569	-13.5785	1.36417e-05	0.00244646	4.07019	ENSMUSG00000079186	Gencode.M18_pc	Gzmc	granzyme C [Source:MGI Symbol;Acc:MGI:109256]	protein_coding	GATGAAACACAGCTAACTACAAGAAGCAAACTAGATCCTGATCTGACCAGCCATCTTCCC	Gzmc	granzyme C	chr14:56850366-56850307	NM_010371	14940	GZMC	12.0953	11.687	11.2948	6.69313	7.6046	7.59932
A_55_P2069969	-4.38546	9.50891	-11.9242	2.81868e-05	0.00340408	3.32711	ENSMUSG00000074179	Gencode.M18_pc	Gm10639	predicted gene 10639 [Source:MGI Symbol;Acc:MGI:3704339]	protein_coding	AAGCAAGGAAGATTTTCAAGTTTTAGTGTGGCTACATTGATGGAGCCACAGATACTGGCC	Gm10639	predicted gene 10639	chr9:78153199-78153258	NM_001122660	100042314	GM10639	11.159	11.7257	12.2202	6.70118	7.57904	7.66832
A_55_P2163961	-4.36887	7.75045	-7.67852	0.000310807	0.0110929	0.749754	ENSMUSG00000032034	Gencode.M18_pc	Kcnj5	potassium inwardly-rectifying channel, subfamily J, member 5 [Source:MGI Symbol;Acc:MGI:104755]	protein_coding	TTAGTAAGATAACAGACCCAATCAGGTTTCTATCGTGGTGACCTAAGTGTGAGGGGACTG	Kcnj5	potassium inwardly-rectifying channel, subfamily J, member 5	chr9:32122477-32122418	NM_010605	16521	KCNJ5	9.98174	11.004	8.81892	5.51321	5.16314	6.02169
A_52_P253567	-4.36191	7.01223	-5.01103	0.00272901	0.0350945	-1.65972	ENSMUSG00000027869	Gencode.M18_pc	Hsd3b6	hydroxy-delta-5-steroid dehydrogenase, 3 beta- and steroid delta-isomerase 6 [Source:MGI Symbol;Acc:MGI:109598]	protein_coding	TAATCCTGAATGGCAACGAGGAAGAGCATCATGAAAGCATATGGTCTGATCCATACCCAT	Hsd3b6	hydroxy-delta-5-steroid dehydrogenase, 3 beta- and steroid delta-isomerase 6	chr3:98610495-98610436	NM_013821	15497	HSD3B6	8.51882	7.82654	11.2342	4.72462	4.82607	4.94313
A_55_P1967481	-4.35271	9.43759	-4.60488	0.00407739	0.0441517	-2.10604	ENSMUSG00000052187	Gencode.M18_pc	Hbb-y	hemoglobin Y, beta-like embryonic chain [Source:MGI Symbol;Acc:MGI:96027]	protein_coding	AATGTGCTGGTGATTGTTTTGGCTAGTCACTTCGGCAATGAATTCACAGCTGAGATGCAG	Hbb-y	hemoglobin Y, beta-like embryonic chain	chr7:111000507-111000448	NM_008221	15135	HBB-Y	10.7568	10.8512	13.2339	6.07882	6.94493	8.75995
A_55_P2080531	-4.33322	9.28525	-14.3891	9.85074e-06	0.00208686	4.39588	ENSMUSG00000045102	Gencode.M18_pc	Poln	DNA polymerase N [Source:MGI Symbol;Acc:MGI:2675617]	protein_coding	GCTAAACTGATACAGACCACACAAAACCTTTGTGGGACAACTGGGACACCTGAAGTAAAA	Poln	DNA polymerase N	chr5:34349906-34349847	NM_181857	272158	POLN	11.0816	12.158	11.1159	7.11388	7.09325	7.14878
A_55_P2150717	-4.30119	8.13697	-6.27585	0.000890674	0.0191115	-0.414349	ENSMUSG00000032446	Gencode.M18_pc	Eomes	eomesodermin [Source:MGI Symbol;Acc:MGI:1201683]	protein_coding	GCTATGAAGAACGAGTGCCCGGTGCTATTAAATGAATTTCAAAGACAAGAAAACATGACA	Eomes	eomesodermin	chr9:118394425-118394484	NM_010136	13813	EOMES	10.9694	8.67047	11.2228	6.03168	6.14634	5.78109
A_51_P244194	-4.29956	7.40132	-10.097	7.06982e-05	0.00530251	2.3575	ENSMUSG00000005338	Gencode.M18_pc	Cadm3	cell adhesion molecule 3 [Source:MGI Symbol;Acc:MGI:2137858]	protein_coding	CTCCCACACAGTGAATGAAGCTAGGCTCTTTTAACAGAATCTGCCCTTGGGGGACAGTAG	Cadm3	cell adhesion molecule 3	chr1:175266453-175266394	NM_053199	94332	CADM3	9.36456	10.4999	8.78887	5.24179	5.16395	5.34888
A_55_P2109397	-4.25977	8.3132	-5.90711	0.00121157	0.0222794	-0.756267	ENSMUSG00000034533	Gencode.M18_pc	Scn10a	sodium channel, voltage-gated, type X, alpha [Source:MGI Symbol;Acc:MGI:108029]	protein_coding	TGCTCGCAGTTGCCGGACAATACCTGAGGGTCGGCCATTAAAATTGATATTTTTAAAGGT	Scn10a	sodium channel, voltage-gated, type X, alpha	chr9:119517644-119517585	NM_001205321	20264	SCN10A	10.4332	8.99481	11.9013	5.86122	6.54364	6.14507
A_51_P392005	-4.25065	7.19942	-10.7705	4.95463e-05	0.00456709	2.73559	ENSMUSG00000041261	Gencode.M18_pc	Car8	carbonic anhydrase 8 [Source:MGI Symbol;Acc:MGI:88253]	protein_coding	ATCTGATTCAGAATAGAAACATTACTGTGTGTTTGTATGAATGGATTTGAAAGTCTAATT	Car8	carbonic anhydrase 8	chr4:8070604-8070545	NM_007592	12319	CAR8	9.22559	10.1792	8.56943	5.05211	5.10874	5.06144
A_55_P2079009	-4.23328	8.87973	-9.4329	0.00010259	0.00622517	1.95778	ENSMUSG00000030737	Gencode.M18_pc	Slco2b1	solute carrier organic anion transporter family, member 2b1 [Source:MGI Symbol;Acc:MGI:1351872]	protein_coding	CAGTTTGTACAGGAATAGCCTGGCTGTATACATACAGCTGATTATTAAATTTGTCTCTGC	Slco2b1	solute carrier organic anion transporter family, member 2b1	chr7:106806982-106806923	NM_001252530	101488	SLCO2B1	10.9917	10.8306	11.1668	5.86915	7.68513	6.73498
A_55_P2000133	-4.13242	9.17058	-20.1699	1.45677e-06	0.00101487	6.18386	ENSMUSG00000024304	Gencode.M18_pc	Cdh2	cadherin 2 [Source:MGI Symbol;Acc:MGI:88355]	protein_coding	AATACAAACAATACACCTCTGACCCCAGCGTTCTGAATAAAAAGCTAATTTTGGATCTGG	Cdh2	cadherin 2	chr18:16747445-16747386	NM_007664	12558	CDH2	10.8102	11.6115	11.2887	7.07255	7.15826	7.08228
A_55_P2164102	-4.13184	7.21769	-5.40415	0.00188855	0.0282751	-1.25011	ENSMUSG00000095416	Gencode.M18_pc	Ighv1-12	immunoglobulin heavy variable V1-12 [Source:MGI Symbol;Acc:MGI:3646284]	IG_V_gene	AATATGCACTGGGTAAAGCAGACACCTAGACAGGGCCTGGAATGGATTGGAGCTATTTAT	NA	NA	chr12:115854258-115854199	KY199170	NA	IGHV1-12	9.8344	10.5094	7.50709	4.96677	5.28482	5.20374
A_55_P2116978	-4.09865	8.6526	-20.3566	1.38236e-06	0.00098191	6.22938	ENSMUSG00000026950	Gencode.M18_pc	Neb	nebulin [Source:MGI Symbol;Acc:MGI:97292]	protein_coding	TTAAGGATGGAGATGCTATAGTGAATGCTCAGGCGATTGATGAAGGCTGGATGTATGGCA	Neb	nebulin	chr2:51992896-51992837	NM_010889	17996	NEB	10.4552	10.9413	10.7093	6.3334	6.52658	6.94983
A_55_P1967478	-4.07668	9.66419	-4.72493	0.00361262	0.0409483	-1.97159	ENSMUSG00000052187	Gencode.M18_pc	Hbb-y	hemoglobin Y, beta-like embryonic chain [Source:MGI Symbol;Acc:MGI:96027]	protein_coding	ATACTGGACTGTTCCTTGAAAGCACATCATGTTTAATAAAGATCATCCTTCCTGGTAATC	Hbb-y	hemoglobin Y, beta-like embryonic chain	chr7:111000327-111000268	NM_008221	15135	HBB-Y	10.8885	10.9788	13.2403	6.67547	7.23744	8.96464
A_52_P306305	-4.04732	12.164	-8.47666	0.000183121	0.00847534	1.32923	ENSMUSG00000089945	Gencode.M18_pc	Pakap	paralemmin A kinase anchor protein [Source:MGI Symbol;Acc:MGI:5141924]	protein_coding	ATTAAAGTGCATACAAACTCAACAACCCTCATGTAGACCAGAAGCTGCAATACACCATGA	Akap2	A kinase (PRKA) anchor protein 2	chr4:57905932-57905991	NM_001035533	11641	PAKAP	13.9709	15.2408	13.3514	10.3562	10.1065	9.95844
A_51_P480861	-4.03727	10.5943	-12.8967	1.82022e-05	0.00281792	3.77755	ENSMUSG00000024738	Gencode.M18_pc	Pga5	pepsinogen 5, group I [Source:MGI Symbol;Acc:MGI:1915935]	protein_coding	GGCTTCTGGTGACGGCGAGTACTTCCTCAAGTGTGACACCATCAACACCCTGCCTGATAT	Pga5	pepsinogen 5, group I	chr19:10744036-10743903	NM_021453	58803	PGA5	12.9758	12.028	12.8351	8.7734	8.13655	8.81716
A_55_P1991530	-4.02216	7.59411	-8.82293	0.000147521	0.00761691	1.56458	ENSMUSG00000040729	Gencode.M18_pc	Cep126	centrosomal protein 126 [Source:MGI Symbol;Acc:MGI:2680221]	protein_coding	CACAGTGCAAAGAAAATACTGATGAGCTGTGATAGTCACTACTTAGTGGAATCATTATTT	Cep126	centrosomal protein 126	chr9:8076905-8076846	NM_001045524	234915	CEP126	9.40643	10.6144	8.79473	5.4955	5.49322	5.76039
A_55_P2074085	-4.01507	8.41604	-14.8103	8.37463e-06	0.00187271	4.55629	ENSMUSG00000064262	Gencode.M18_pc	Gimap8	GTPase, IMAP family member 8 [Source:MGI Symbol;Acc:MGI:2685303]	protein_coding	GTCTTGGACTGCCTAAACCTTTGTATTTGTATTCTTTATAGCCACTCTGATTAAATCTCT	Gimap8	GTPase, IMAP family member 8	chr6:48610775-48610834	NM_001286629	243374	GIMAP8	10.621	10.7866	9.86309	6.22874	6.68321	6.31356
A_55_P2100968	-3.99507	8.80407	-6.18254	0.0009615	0.0197939	-0.499329	ENSMUSG00000041144	Gencode.M18_pc	Dnah7b	dynein, axonemal, heavy chain 7B [Source:MGI Symbol;Acc:MGI:2684953]	protein_coding	CTGAATGTGGCATCATCTCTTGCAACTTCTTGTTAGATTGAATAAAACACATTTTACCGT	Dnah7b	dynein, axonemal, heavy chain 7B	chr1:46430286-46430345	NM_001160386	227058	DNAH7B	10.4202	10.1662	11.8184	5.68953	7.60908	7.12098
A_55_P2032946	-3.9929	9.01557	-11.9098	2.83764e-05	0.00340408	3.32014	ENSMUSG00000074183	Gencode.M18_pc	Gsta1	glutathione S-transferase, alpha 1 (Ya) [Source:MGI Symbol;Acc:MGI:1095417]	protein_coding	CTGGCCTCTAATGGTTTGCAATTATAAAAAGCAATTGTTGATCCTGGCTATTTTGCAATA	Gm3776	predicted gene 3776	chr9:78116894-78116953	NM_001243092	100042295	GSTA1	10.4976	11.0908	11.4476	6.45974	7.236	7.36161
A_51_P333274	-3.98514	15.7957	-16.853	4.03812e-06	0.0015238	5.25898	ENSMUSG00000015437	Gencode.M18_pc	Gzmb	granzyme B [Source:MGI Symbol;Acc:MGI:109267]	protein_coding	CCCCGAGAATGTTATCTAATGCTAGTCATCATTAATAGCTCCCTACAGAACTTTCATACA	Gzmb	granzyme B	chr14:56877975-56877916	NM_013542	14939	GZMB	17.8813	18.0582	17.4253	14.1944	13.6661	13.5488
A_55_P2009225	-3.97919	10.5236	-9.26425	0.000113186	0.00657434	1.85167	ENSMUSG00000016494	Gencode.M18_pc	Cd34	CD34 antigen [Source:MGI Symbol;Acc:MGI:88329]	protein_coding	TAAACAAGATATCGGGAGCCACCAGAGCTATTCCCGAAAGACTCTTATTGCATTGGTCAC	Cd34	CD34 antigen	chr1:196785280-196785339	NM_133654	12490	CD34	12.9355	12.8954	11.7086	8.78156	8.90855	7.91184
A_51_P308298	-3.97733	11.2973	-6.52548	0.000728919	0.0171578	-0.191942	ENSMUSG00000067818	Gencode.M18_pc	Myl9	myosin, light polypeptide 9, regulatory [Source:MGI Symbol;Acc:MGI:2138915]	protein_coding	CTTAGGCTTGTGGAGTTGTCTCAGCACCCCCAGAATGCATTGAGGGAAGGGAAGCTGCCT	Myl9	myosin, light polypeptide 9, regulatory	chr2:156607301-156607360	NM_172118	98932	MYL9	12.978	13.6654	13.2144	8.56197	8.65825	10.7056
A_51_P215530	-3.95914	10.1479	-15.0447	7.66562e-06	0.00178009	4.64311	ENSMUSG00000021720	Gencode.M18_pc	Rnf180	ring finger protein 180 [Source:MGI Symbol;Acc:MGI:1919066]	protein_coding	TGAATCACTTGAGAAATAACAAATCTGACTTTTAGTAACCTTACTGATCAGTGCATGTCC	Rnf180	ring finger protein 180	chr13:105920794-105920735	XM_006517760	71816	RNF180	12.3659	12.3703	11.6462	8.00547	7.95153	8.54795
A_52_P276955	-3.95351	6.81848	-9.54008	9.64566e-05	0.00603999	2.0242	ENSMUSG00000052504	Gencode.M18_pc	Epha3	Eph receptor A3 [Source:MGI Symbol;Acc:MGI:99612]	protein_coding	ACCCAGAGAATTATATGTTCTTTTCTACAACTGTTGAACAATCCACTTACATGTACCAAC	Epha3	Eph receptor A3	chr16:63545214-63545155	NM_010140	13837	EPHA3	7.99635	9.68749	8.70187	4.77253	4.88395	4.8687
A_51_P166339	-3.95238	10.7915	-19.4928	1.76892e-06	0.00108656	6.01347	ENSMUSG00000025432	Gencode.M18_pc	Avil	advillin [Source:MGI Symbol;Acc:MGI:1333798]	protein_coding	CTCACATTTGGAGCGAAGGAAAATCATATGAGCAGCTAAAGAACGAGCTGGGAGATGCAA	Avil	advillin	chr10:126453541-126454065	NM_009635	11567	AVIL	12.5867	12.5106	13.2058	8.90457	8.67275	8.86855
A_51_P229602	-3.91952	8.13376	-28.2749	2.11869e-07	0.000365484	7.70381	ENSMUSG00000026640	Gencode.M18_pc	Plxna2	plexin A2 [Source:MGI Symbol;Acc:MGI:107684]	protein_coding	CATGTACCTATTGTAAATATGAAACTCCTATTTTGCAAGCCAAGGACACAATTTGTACTG	Plxna2	plexin A2	chr1:196642958-196643017	NM_008882	18845	PLXNA2	10.2326	10.1912	9.85671	5.99716	6.28402	6.24081
A_55_P2427150	-3.90565	7.80306	-24.6847	4.60526e-07	0.000505546	7.13168	ENSMUSG00000101581	Gencode M18	C430002N11Rik	RIKEN cDNA C430002N11 gene [Source:MGI Symbol;Acc:MGI:2442576]	processed_transcript	ACATGTCCTTGTGATTTTGATTGGCATTCCCCTGGCGATTAATAACTTGAGCATCTTTTC	C430002N11Rik	RIKEN cDNA C430002N11 gene	chr9:96674754-96674813	NR_102296	319707	C430002N11RIK	10.0674	9.70964	9.49063	5.83295	5.77796	5.93979
A_55_P2116465	-3.90327	8.48004	-16.2138	5.02503e-06	0.00162533	5.05162	ENSMUSG00000021745	Gencode.M18_pc	Ptprg	protein tyrosine phosphatase, receptor type, G [Source:MGI Symbol;Acc:MGI:97814]	protein_coding	AGATTTCACAGTAGCTATGTGGACAGTGTGTGTTATTTCTATGTTGACTCTCTGAAGTAG	Ptprg	protein tyrosine phosphatase, receptor type, G	chr14:13071066-13071125	NM_008981	19270	PTPRG	10.4634	10.7848	10.0468	6.46403	6.25451	6.86669
A_55_P2087805	-3.89568	8.00331	-7.02592	0.000496483	0.0141064	0.233288	ENSMUSG00000027871	Gencode.M18_pc	Hsd3b1	hydroxy-delta-5-steroid dehydrogenase, 3 beta- and steroid delta-isomerase 1 [Source:MGI Symbol;Acc:MGI:96233]	protein_coding	CTTGCCTTTGGTAAAATCCCGTTGCTTTCTGAAGCAAAACAAAAACAGCAATAAATATTG	Hsd3b1	hydroxy-delta-5-steroid dehydrogenase, 3 beta- and steroid delta-isomerase 1	chr3:98656186-98656127	NM_008293	15492	HSD3B1	9.29947	9.58249	10.9715	5.51326	5.78811	6.86504
A_55_P2074694	-3.88256	7.30543	-27.9123	2.28108e-07	0.00037561	7.65186	ENSMUSG00000033805	Gencode.M18_pc	Ephx4	epoxide hydrolase 4 [Source:MGI Symbol;Acc:MGI:2686228]	protein_coding	AGAAACAAGGAGAGACTGACTTTATCTCCTACAGGGAGTCTTTCATGGAATTTCAAAAAA	Ephx4	epoxide hydrolase 4	chr5:107858892-107858951	NM_001001804	384214	EPHX4	9.22747	9.37881	9.13385	5.14086	5.5954	5.35619
A_55_P2019520	-3.88078	11.8256	-16.5492	4.47583e-06	0.00155943	5.16175	ENSMUSG00000068289	Gencode.M18_pc	Cma2	chymase 2, mast cell [Source:MGI Symbol;Acc:MGI:88426]	protein_coding	AGCTCTTCTGATAACCCTTGGGTTCAACAAAGCATGTGTCCATCCTGTCCCCTGCCTGCC	Cma2	chymase 2, mast cell	chr14:56592703-56592762	NM_001024714	545055	CMA2	13.7399	14.2259	13.3322	10.0262	9.73862	9.89079
A_55_P2120244	-3.86621	15.6362	-16.9877	3.86022e-06	0.0015238	5.30135	ENSMUSG00000005339	Gencode.M18_pc	Fcer1a	Fc receptor, IgE, high affinity I, alpha polypeptide [Source:MGI Symbol;Acc:MGI:95494]	protein_coding	CAGGAATTGCATAAATGCTTCATTAAACCAACTGCAGCTGGTTATGTAACATGCAATAAA	Fcer1a	Fc receptor, IgE, high affinity I, alpha polypeptide	chr1:175151497-175151438	NM_010184	14125	FCER1A	17.5259	17.8011	17.381	14.0162	13.2498	13.8434
A_51_P352303	-3.83254	10.8541	-6.07267	0.00105336	0.02075	-0.600717	ENSMUSG00000025813	Gencode.M18_pc	Homer2	homer scaffolding protein 2 [Source:MGI Symbol;Acc:MGI:1347354]	protein_coding	CCGAAAACAGAGTGAAATCATACCTCAGCTCATGTCCGAGTGTGAATATGTCTCTGAGAA	Homer2	homer scaffolding protein 2	chr7:88756258-88756199	NM_011983	26557	HOMER2	12.7858	13.5891	11.9363	9.94642	7.92587	8.94123
A_55_P1981269	-3.82748	7.29197	-19.4316	1.80084e-06	0.00108656	5.99763	ENSMUSG00000096600	Gencode.M18_pc	Trav6d-3	T cell receptor alpha variable 6D-3 [Source:MGI Symbol;Acc:MGI:3650097]	TR_V_gene	CTTGCAGAAAACCTCAGTGCAAGAGATAGATTCGGCTGTGTACTACTGTGCTATGAGTGA	NA	NA	chr14:53346535-53346594	AF012164	NA	TRAV6D-3	9.34125	9.41112	8.86476	5.65861	5.29819	5.17788
A_55_P2034864	-3.82446	10.2041	-37.6153	4.12635e-08	0.000186852	8.71465	ENSMUSG00000045136	Gencode.M18_pc	Tubb2b	tubulin, beta 2B class IIB [Source:MGI Symbol;Acc:MGI:1920960]	protein_coding	ACTTGAGATCTTTCTGAACTCCTGTTGTAATGGCTAAAATCACATAAACCTTTGTGTCCT	Tubb2b	tubulin, beta 2B class IIB	chr13:34219151-34219092	NM_023716	73710	TUBB2B	12.1823	12.1497	12.017	8.13004	8.34528	8.40022
A_66_P128434	-3.82287	13.5476	-11.8006	2.98683e-05	0.00352446	3.26686	ENSMUSG00000005672	Gencode.M18_pc	Kit	KIT proto-oncogene receptor tyrosine kinase [Source:MGI Symbol;Acc:MGI:96677]	protein_coding	GTCAGGTACTTAAGGGGCCACACCATTGAGAATTTTGTCTTGGATATTCTTGAAAGTTTA	Kit	KIT proto-oncogene receptor tyrosine kinase	chr5:76052394-76052453	NM_001122733	16590	KIT	15.6853	15.9601	14.7316	11.7877	11.6219	11.4988
A_55_P1953753	-3.82111	7.51289	-13.1457	1.63555e-05	0.00264616	3.88653	ENSMUSG00000044288	Gencode.M18_pc	Cnr1	cannabinoid receptor 1 (brain) [Source:MGI Symbol;Acc:MGI:104615]	protein_coding	CTGGTAGCATCATTGAGACTGCTGTGATGTCTTTGTCAGTAATCTGTATAATATTTTGTA	Cnr1	cannabinoid receptor 1 (brain)	chr4:34035526-34035585	NM_007726	12801	CNR1	9.08319	9.44178	9.74535	5.4702	5.19366	6.14314
A_55_P2029711	-3.81647	9.01721	-19.1763	1.9414e-06	0.00109889	5.93081	ENSMUSG00000024304	Gencode.M18_pc	Cdh2	cadherin 2 [Source:MGI Symbol;Acc:MGI:88355]	protein_coding	AAGAAAAGAAAAGTGAAAGGGGTGGCCTGGTACTGGCAGCACTAGCAAGTGTGTGTTTTT	Cdh2	cadherin 2	chr18:16747618-16747559	NM_007664	12558	CDH2	10.5067	11.2649	11.0048	7.15382	7.01913	7.15398
A_55_P2074631	-3.8045	8.71909	-12.5838	2.08794e-05	0.00306057	3.63704	ENSMUSG00000025586	Gencode.M18_pc	Cpeb1	cytoplasmic polyadenylation element binding protein 1 [Source:MGI Symbol;Acc:MGI:108442]	protein_coding	GGAGGGTTGATAGAAGTTTTTAATCACAGTCACAGGACTTTTTCTTTTGTAACTGAGCTT	Cpeb1	cytoplasmic polyadenylation element binding protein 1	chr7:88492396-88492337	NM_001252525	12877	CPEB1	10.5225	10.1381	11.2034	6.5324	7.12173	6.79639
A_66_P126586	-3.74552	7.77572	-13.0916	1.67376e-05	0.00267109	3.86304	NA	Agilent eArray	Gm46935	predicted gene, 46935	NA	GATGTCACAGAGAGATTTGGATTCCTTTGTCTGCTGTCAGAGCCTCTTTCAGCTAAAACA	Gm46935	predicted gene, 46935	chr5:95857134-95857193	XM_017321261	108169101	GM46935	9.32463	10.3156	9.30516	5.86375	5.87925	5.96588
A_52_P444946	-3.7423	7.36188	-8.63575	0.000165651	0.00809835	1.4385	ENSMUSG00000046215	Gencode.M18_pc	Rprml	reprimo-like [Source:MGI Symbol;Acc:MGI:2144486]	protein_coding	GCTCATCAAGTCCGAGAGCATGATCAACTTTCTGATGCAGGAGCGCAGGCCCTCCAAGGA	Rprml	reprimo-like	chr11:103511358-103511417	NM_001033212	104582	RPRML	9.21957	10.127	8.35255	5.40607	5.57625	5.48986
A_51_P426096	-3.74089	7.8046	-14.314	1.01448e-05	0.00213406	4.36667	ENSMUSG00000018623	Gencode.M18_pc	Mmp7	matrix metallopeptidase 7 [Source:MGI Symbol;Acc:MGI:103189]	protein_coding	AGTCACTCTTCTGTTCCCGGTACTGTGATGTACCCTACCTATCAAAGAGACTACTCAGAA	Mmp7	matrix metallopeptidase 7	chr9:7697641-7697700	NM_010810	17393	MMP7	9.99299	9.92618	9.10598	5.76473	6.13241	5.90532
A_51_P155873	-3.73792	8.96001	-5.9238	0.00119445	0.022099	-0.740439	ENSMUSG00000050423	Gencode.M18_pc	Ppp1r3g	protein phosphatase 1, regulatory subunit 3G [Source:MGI Symbol;Acc:MGI:1923737]	protein_coding	AGATTCGATGTATTTTCTTCCGTGATTGGATACAAATGTCTTTTAAGAAAGTAAAGGCCG	Ppp1r3g	protein phosphatase 1, regulatory (inhibitor) subunit 3G	chr13:36061999-36062058	NM_029628	76487	PPP1R3G	11.1115	11.831	9.54441	7.0125	7.70609	6.55456
A_51_P103397	-3.72027	13.6248	-7.32036	0.000400184	0.0126587	0.471392	ENSMUSG00000001930	Gencode.M18_pc	Vwf	Von Willebrand factor [Source:MGI Symbol;Acc:MGI:98941]	protein_coding	CAAGTGAGGCCTGTGCAGCTACAGCGGATTCCTACTGATACCCATGCTATGACCTGGCTA	Vwf	Von Willebrand factor	chr6:125636551-125636610	NM_011708	22371	VWF	15.6969	15.8849	14.8731	10.836	11.8261	12.6321
A_51_P406157	-3.70968	6.78155	-13.3518	1.49912e-05	0.0025625	3.97488	ENSMUSG00000030666	Gencode.M18_pc	Calcb	calcitonin-related polypeptide, beta [Source:MGI Symbol;Acc:MGI:2151254]	protein_coding	CCGTTGTTACTTGAGAGGAATGAAACCAAGTATAAATGAGTTAATTCTGTGTTTGTTTGC	Calcb	calcitonin-related polypeptide, beta	chr7:121866534-121866593	NM_054084	116903	CALCB	9.00959	8.89714	8.00246	4.83001	4.90259	5.04753
A_51_P302167	-3.70233	6.8277	-8.78758	0.00015076	0.00770588	1.54097	ENSMUSG00000020173	Gencode.M18_pc	Cobl	cordon-bleu WH2 repeat [Source:MGI Symbol;Acc:MGI:105056]	protein_coding	CAAGGAGCTGTATGCGTGGGACAACAGAAGAGAAATGTTTAGAAAATCATCACTTGGCAA	Cobl	cordon-bleu WH2 repeat	chr11:12275844-12269667	NM_172496	12808	COBL	8.49293	9.59159	7.95208	4.79534	5.23306	4.9012
A_55_P2030155	-3.67722	7.89439	-11.4537	3.52515e-05	0.00376702	3.09389	ENSMUSG00000030737	Gencode.M18_pc	Slco2b1	solute carrier organic anion transporter family, member 2b1 [Source:MGI Symbol;Acc:MGI:1351872]	protein_coding	GCTGTATACATACAGCTGATTATTAAATTTGTCTCTGCATAATGACTCTTCCACGACAAA	Slco2b1	solute carrier organic anion transporter family, member 2b1	chr7:106806960-106806901	NM_001252530	101488	SLCO2B1	9.73461	9.6596	9.8048	5.40375	6.70503	6.05857
A_51_P151576	-3.63768	11.0939	-8.44948	0.000186315	0.00853998	1.31037	ENSMUSG00000050761	Gencode.M18_pc	Gp1bb	glycoprotein Ib, beta polypeptide [Source:MGI Symbol;Acc:MGI:107852]	protein_coding	CTGGCGCTGCGACTGCCGCCTATTGCCGCTGCGCGCCTGGCTGGCCGGCCGCCCGGAGCG	Gp1bb	glycoprotein Ib, beta polypeptide	chr16:18621166-18621107	NM_001001999	14724	GP1BB	12.9377	13.4945	12.3059	8.79296	9.0101	10.022
A_52_P370935	-3.62955	10.5555	-10.9795	4.4553e-05	0.00428111	2.84781	ENSMUSG00000107705	Gencode.M18_pc	Gm45062	predicted gene 45062 [Source:MGI Symbol;Acc:MGI:5753638]	protein_coding	AAGTACTTAGCATCACAAAATAGCTATTAACACTGATCTTGGCAGGGACCGACTTATATT	Glcci1	glucocorticoid induced transcript 1	chr6:8543357-8543416	NM_133236	170772	GM45062	12.425	12.8792	11.8068	8.70573	8.35241	9.16415
A_55_P2027731	-3.61935	12.1123	-10.3746	6.0907e-05	0.00504642	2.51649	ENSMUSG00000026069	Gencode.M18_pc	Il1rl1	interleukin 1 receptor-like 1 [Source:MGI Symbol;Acc:MGI:98427]	protein_coding	CCTTACCCAAATTGCCATTACAGTCGAGCATGTTTTCAGTTCTAAATGCCTTTTATATAT	Il1rl1	interleukin 1 receptor-like 1	chr1:40520014-40520073	NM_001025602	17082	IL1RL1	14.336	14.2711	13.1589	10.6086	10.117	10.1823
A_51_P477682	-3.60094	7.19656	-11.0581	4.2831e-05	0.00420486	2.88936	ENSMUSG00000027978	Gencode.M18_pc	Prss12	protease, serine 12 neurotrypsin (motopsin) [Source:MGI Symbol;Acc:MGI:1100881]	protein_coding	CTTTGTACCTTGGATAAAAAGTGTCACCAGTCTGTAACTTATGGAAAGCTCAAGAAAATA	Prss12	protease, serine 12 neurotrypsin (motopsin)	chr3:123209409-123209468	NM_008939	19142	PRSS12	8.96859	8.43529	9.5872	5.02549	5.65936	5.50342
A_55_P2057686	-3.58573	9.34537	-8.245	0.000212537	0.00906085	1.16654	ENSMUSG00000063838	Gencode.M18_pc	Cdc42ep5	CDC42 effector protein (Rho GTPase binding) 5 [Source:MGI Symbol;Acc:MGI:1929745]	protein_coding	TGCTGACCTCCAGCTGGACGACGTCATCGGTCTGTAGTGTCATAATTCCCTCAACCCCTC	Cdc42ep5	CDC42 effector protein (Rho GTPase binding) 5	chr7:4102973-4102914	NM_021454	58804	CDC42EP5	10.9778	11.6675	10.7694	6.91855	7.34225	8.3967
A_51_P423290	-3.58458	11.4538	-7.2177	0.000431073	0.0130788	0.38935	ENSMUSG00000054641	Gencode.M18_pc	Mmrn1	multimerin 1 [Source:MGI Symbol;Acc:MGI:1918195]	protein_coding	TCCTGTGAGTCTTTCCAGTGTAGAATAAAATGTCACAGCAGATTTCCCAAAGAAACTTAA	Mmrn1	multimerin 1	chr6:60938883-60938942	NM_027613	70945	MMRN1	13.1664	13.9282	12.6437	9.08598	9.33029	10.5682
A_52_P566681	-3.57241	6.714	-5.40733	0.00188309	0.0282471	-1.24688	ENSMUSG00000031517	Gencode.M18_pc	Gpm6a	glycoprotein m6a [Source:MGI Symbol;Acc:MGI:107671]	protein_coding	TCGTGTTTGTTTTAACCTTGACTCTCTTTTGATTCTTTCTAATGCTACAAGAATGCTGTG	Gpm6a	glycoprotein m6a	chr8:56145539-56145598	NM_153581	234267	GPM6A	6.93732	9.09361	9.46969	4.88815	4.93655	4.9587
A_55_P1962303	-3.56019	15.3398	-6.46454	0.000765037	0.0176075	-0.245583	ENSMUSG00000069919	Gencode.M18_pc	Hba-a1	hemoglobin alpha, adult chain 1 [Source:MGI Symbol;Acc:MGI:96015]	protein_coding	TACTTCCCTCACTTTGATGTAAGCCACGGCTCTGCCCAGGTCAAGGGTCACGGCAAGAAG	Hba-a1	hemoglobin alpha, adult chain 1	chr11:32183955-32184014	NM_008218	15122	HBA-A1	16.8809	16.6621	17.8167	12.6757	13.4262	14.5772
A_55_P1959546	-3.55551	6.74792	-4.47518	0.00465747	0.0475945	-2.25369	ENSMUSG00000072821	Gencode.M18_pc	Gm6351	predicted gene 6351 [Source:MGI Symbol;Acc:MGI:3647817]	protein_coding	TAGAAAGATTTGTGCGACTTTGTCAGGATCTCATGGATACACTGAGGGCAATAAGGCAGC	NA	NA	chr5:94877422-94877481	XM_006535298	NA	GM6351	7.70444	10.4183	7.45425	5.04527	4.87552	4.98971
A_55_P2000943	-3.54581	11.457	-13.6568	1.32086e-05	0.0024045	4.10269	ENSMUSG00000034825	Gencode.M18_pc	Nrip3	nuclear receptor interacting protein 3 [Source:MGI Symbol;Acc:MGI:1925843]	protein_coding	TTTCTGACTGTACTGGGCTTATTTGTGACACCGATATATCAATAAAGTGGACTTGTTCTC	Nrip3	nuclear receptor interacting protein 3	chr7:116901632-116901573	NM_020610	78593	NRIP3	13.6066	13.3799	12.7034	9.94155	9.49126	9.61961
A_51_P245368	-3.54371	9.27412	-7.6147	0.000324887	0.0113179	0.701023	ENSMUSG00000028970	Gencode.M18_pc	Abcb1b	ATP-binding cassette, sub-family B (MDR/TAP), member 1B [Source:MGI Symbol;Acc:MGI:97568]	protein_coding	TCCAGGCTGGAGCAAAGCGCTCATGAGCTGTGACTATCTGAGGTGCTAAGTATTTTTAAT	Abcb1b	ATP-binding cassette, sub-family B (MDR/TAP), member 1B	chr5:8865925-8865984	NM_011075	18669	ABCB1B	10.8759	12.0766	10.1855	7.48234	7.45942	7.56504
A_52_P216672	-3.53576	8.59168	-21.5438	1.00104e-06	0.000796106	6.50482	ENSMUSG00000064023	Gencode.M18_pc	Klk8	kallikrein related-peptidase 8 [Source:MGI Symbol;Acc:MGI:1343327]	protein_coding	TTTCCAAACACCCTCAACTGTGCGGAAGTGAAAATCTATTCCCAGAACAAGTGTGAGAGA	Klk8	kallikrein related-peptidase 8	chr7:51057455-51057514	NM_008940	259277	KLK8	10.2829	10.5927	10.2031	6.77882	7.08269	6.60987
A_55_P2083351	-3.52369	9.41933	-7.28823	0.000409568	0.0128018	0.445826	ENSMUSG00000051022	Gencode.M18_pc	Hs3st1	heparan sulfate (glucosamine) 3-O-sulfotransferase 1 [Source:MGI Symbol;Acc:MGI:1201606]	protein_coding	AACCTGCCTCCAATCCAAAATAGCTCTTTGTTTTCACCTCCTTGTCAAATCTATAATCTT	Hs3st1	heparan sulfate (glucosamine) 3-O-sulfotransferase 1	chr5:40005266-40005207	NM_010474	15476	HS3ST1	10.4023	12.2916	10.8496	7.53377	7.63731	7.80137
A_52_P467488	-3.51602	11.1062	-8.46978	0.000183924	0.00847686	1.32446	ENSMUSG00000050473	Gencode.M18_pc	Slc35d3	solute carrier family 35, member D3 [Source:MGI Symbol;Acc:MGI:1923407]	protein_coding	CTGAATGCTATAACCTTTAAAAAACCCATTTTCCCATGTAATACTCTTTCGAGGAAATGC	Slc35d3	solute carrier family 35, member D3	chr10:19567957-19567898	NM_029529	76157	SLC35D3	12.7526	13.414	12.4259	8.93877	8.9624	10.1433
A_55_P1982319	-3.48689	6.923	-21.9758	8.93967e-07	0.000789874	6.59936	ENSMUSG00000027977	Gencode.M18_pc	Ndst3	N-deacetylase/N-sulfotransferase (heparan glucosaminyl) 3 [Source:MGI Symbol;Acc:MGI:1932544]	protein_coding	GACTTATAATACGGGGCTTCCTCAGGAAGAAATGAAATGGTTATTTCAATGTTTATAGCT	Ndst3	N-deacetylase/N-sulfotransferase (heparan glucosaminyl) 3	chr3:123229293-123229234	NM_031186	83398	NDST3	8.8155	8.83558	8.34825	5.13785	5.07871	5.3221
A_51_P509643	-3.4719	11.8211	-6.89784	0.000546574	0.014921	0.126983	ENSMUSG00000025889	Gencode.M18_pc	Snca	synuclein, alpha [Source:MGI Symbol;Acc:MGI:1277151]	protein_coding	GTCTTGTGTGCTGTGGATATTGTTGTGGCTTCACACTTAAATTGTTAGAAGAAACTTAAA	Snca	synuclein, alpha	chr6:60681916-60681857	NM_001042451	20617	SNCA	13.1896	14.33	13.1517	9.51878	9.74494	10.9918
A_55_P2085905	-3.47058	13.6572	-8.8197	0.000147813	0.00761691	1.56243	ENSMUSG00000039062	Gencode.M18_pc	Anpep	alanyl (membrane) aminopeptidase [Source:MGI Symbol;Acc:MGI:5000466]	protein_coding	CACGAGATCCAGAACCAAAGAATCAACAGGGCACAAGATCTATATATATTTTTAAGAGAA	Anpep	alanyl (membrane) aminopeptidase	chr7:86966775-86966716	NM_008486	16790	ANPEP	16.1257	14.8965	15.1552	11.3704	12.2623	12.1329
A_52_P534583	-3.46031	11.5348	-4.56335	0.0042537	0.0452013	-2.15304	NA	Agilent eArray	Ahsp	alpha hemoglobin stabilizing protein	NA	TGGTGATTGTGGTTCATGACTGGGTGAACTTGTACACCAACTATTACAAGAAGCTCGTGC	Ahsp	alpha hemoglobin stabilizing protein	NA	NM_133245	170812	AHSP	12.6282	13.0227	14.1438	8.71778	9.36684	11.3292
A_51_P505868	-3.45876	7.9685	-12.7737	1.92041e-05	0.00291439	3.72278	ENSMUSG00000048332	Gencode.M18_pc	Lhfp	lipoma HMGIC fusion partner [Source:MGI Symbol;Acc:MGI:1920048]	protein_coding	AAATGGACCAAAGGCTAAAAACATTGCAGGGCATTGTTGTTTCTATTCCACAGAGTACCG	Lhfp	lipoma HMGIC fusion partner	chr3:53064744-53064803	NM_175386	108927	LHFP	9.74981	10.1391	9.20474	5.97631	6.20318	6.53786
A_55_P1997931	-3.45691	13.0792	-15.3009	6.96978e-06	0.00170771	4.73604	ENSMUSG00000033900	Gencode.M18_pc	Map9	microtubule-associated protein 9 [Source:MGI Symbol;Acc:MGI:2442208]	protein_coding	CTGTCTCTCGCCTCTCCCTGTCTTCTATGTTCCTTACATGTATATACATATATGTATGTG	Map9	microtubule-associated protein 9	chr3:82199084-82199143	NM_001081230	213582	MAP9	14.7325	15.2492	14.4413	11.5071	11.138	11.4072
A_51_P110471	-3.45084	7.17632	-13.6674	1.31512e-05	0.0024045	4.10707	ENSMUSG00000028194	Gencode.M18_pc	Ddah1	dimethylarginine dimethylaminohydrolase 1 [Source:MGI Symbol;Acc:MGI:1916469]	protein_coding	ATTCTTTGCATTTAAAGAGTTTCTGCAGCATGGCCGGACCCAACCTGATTGCAATAGGGT	Ddah1	dimethylarginine dimethylaminohydrolase 1	chr3:145516152-145516211	NM_026993	69219	DDAH1	9.40964	8.39412	8.90146	5.4772	5.4173	5.4582
A_52_P488427	-3.45024	8.48828	-11.5331	3.39248e-05	0.00371572	3.13402	ENSMUSG00000003585	Gencode.M18_pc	Sec14l2	SEC14-like lipid binding 2 [Source:MGI Symbol;Acc:MGI:1915065]	protein_coding	CAATAAAAAGCTCTTGACCCCACACAACTTGAGAGCCAGGTTACAGGCTGCCCAGAATTC	Sec14l2	SEC14-like lipid binding 2	chr11:3997333-3997274	NM_144520	67815	SEC14L2	10.1507	10.7141	9.77547	7.06499	6.33216	6.89232
A_55_P2034998	-3.44444	11.7383	-11.1701	4.05059e-05	0.00406737	2.94811	ENSMUSG00000030516	Gencode.M18_pc	Tjp1	tight junction protein 1 [Source:MGI Symbol;Acc:MGI:98759]	protein_coding	CAGCACGATTTCTGTTTAGATAATACACCACTACATTCTGTTAATAATCAGTAGGTGTGA	Tjp1	tight junction protein 1	chr7:72441185-72441126	NM_009386	21872	TJP1	13.3747	14.0686	12.9382	10.3156	9.90902	9.82359
A_66_P110964	-3.43353	7.53826	-15.5729	6.31038e-06	0.00167179	4.83256	ENSMUSG00000038665	Gencode.M18_pc	Dgki	diacylglycerol kinase, iota [Source:MGI Symbol;Acc:MGI:2443430]	protein_coding	CAGGGCACTGTTCTCTCCTTCACTACGCAGCTAAGACCGGCAATGGGGACATTGTGAAGT	Dgki	diacylglycerol kinase, iota	chr6:36812430-36812371	NM_001081206	320127	DGKI	9.32091	9.65089	8.79326	5.87492	5.73076	5.8588
A_52_P150683	-3.42801	8.58373	-5.05241	0.00262286	0.034351	-1.61559	ENSMUSG00000042351	Gencode.M18_pc	Grap2	GRB2-related adaptor protein 2 [Source:MGI Symbol;Acc:MGI:1333842]	protein_coding	GAATGATATTGTGTTTCTCTAAGGTGAAAACTCAGGTATAAAATGAGAAAAGGGTGAGAC	Grap2	GRB2-related adaptor protein 2	chr15:80482962-80483021	NM_010815	17444	GRAP2	10.7222	11.1629	9.00805	6.21279	6.60485	7.79153
A_55_P2144886	-3.42294	7.42679	-21.094	1.1289e-06	0.000835093	6.40321	ENSMUSG00000032128	Gencode.M18_pc	Robo3	roundabout guidance receptor 3 [Source:MGI Symbol;Acc:MGI:1343102]	protein_coding	TCTACCGCTGGTAGCAATTCTTCTAGGGGTTCCAACAGCTCTCGAGGTTCTCGGGGCTCT	Robo3	roundabout guidance receptor 3	chr9:37224416-37224357	NM_001164767	19649	ROBO3	9.09473	9.40396	8.9161	5.60468	5.60621	5.93507
A_51_P303089	-3.41978	7.66579	-15.9074	5.59694e-06	0.00164204	4.94833	ENSMUSG00000033209	Gencode.M18_pc	Ttc28	tetratricopeptide repeat domain 28 [Source:MGI Symbol;Acc:MGI:2140873]	protein_coding	CTGTACTCTTGTCCAGGCATTTTAGAACTATGCAATTGTGGTTTAAAACACAACATTGTG	Ttc28	tetratricopeptide repeat domain 28	chr5:111716168-111716227	NM_001267622	209683	TTC28	9.69685	9.50984	8.92035	5.9728	6.08374	5.81117
A_55_P1964568	-3.41205	7.23896	-5.46194	0.00179196	0.0274369	-1.19168	ENSMUSG00000024593	Gencode.M18_pc	Megf10	multiple EGF-like-domains 10 [Source:MGI Symbol;Acc:MGI:2685177]	protein_coding	GTCTCGTTGTCATTTGTACTGCCAAATAGTCAATAGATGAATGCAATAAACTTTCCCATT	Megf10	multiple EGF-like-domains 10	chr18:57457056-57457115	NM_001001979	70417	MEGF10	8.51518	10.2167	8.10311	5.36068	4.99348	6.24465
A_55_P1962010	-3.39914	13.4261	-7.64397	0.000318341	0.0111764	0.723416	ENSMUSG00000030159	Gencode.M18_pc	Clec1b	C-type lectin domain family 1, member b [Source:MGI Symbol;Acc:MGI:1913287]	protein_coding	TTAGTTCTGCTGATCTCATCCATGGGGCTGGTTGTTGGACTCGTGGCTCTGGGGATCATG	Clec1b	C-type lectin domain family 1, member b	chr6:129350113-129350172	NM_019985	56760	CLEC1B	14.9921	15.6632	14.7219	11.2099	11.3506	12.6193
A_52_P330289	-3.39405	10.1316	-11.9801	2.74623e-05	0.00337236	3.35414	ENSMUSG00000037940	Gencode.M18_pc	Inpp4b	inositol polyphosphate-4-phosphatase, type II [Source:MGI Symbol;Acc:MGI:2158925]	protein_coding	CGGCATTTCAGATTTGAGGAAAGTTGCATTTAAAATAACTGAAGCCACGTCCAATGATGT	Inpp4b	inositol polyphosphate-4-phosphatase, type II	chr8:84565823-84565882	NM_001024617	234515	INPP4B	11.8042	12.3252	11.3565	8.78596	8.30808	8.20968
A_55_P2318584	-3.38927	8.43173	-14.192	1.06446e-05	0.00215425	4.31882	ENSMUSG00000030762	Gencode.M18_pc	Aqp8	aquaporin 8 [Source:MGI Symbol;Acc:MGI:1195271]	protein_coding	CCCAAAGATCTTGCTTCCTCAGCTCCCAATCTGACTTTGTAATAAATGGCTTAGCATTTC	Aqp8	aquaporin 8	chr7:130611453-130611512	NM_007474	11833	AQP8	9.7159	10.2631	10.4001	6.58466	6.52824	7.09839
A_55_P2013391	-3.38188	14.131	-7.34314	0.000393684	0.0125542	0.489454	NA	Agilent eArray	Gm4402	predicted gene 4402	NA	CCCAGTCCCACTTTTAAAATATCTATCTATCTATCTATCTATCTATCTATCTATCTATCT	Gm4402	predicted gene 4402	chr18:69379344-69379403	AK028917	100043380	GM4402	16.022	16.5996	14.8441	12.6999	12.0901	12.5301
A_51_P398191	-3.37143	7.06163	-13.6614	1.31838e-05	0.0024045	4.10458	ENSMUSG00000029673	Gencode.M18_pc	Auts2	autism susceptibility candidate 2 [Source:MGI Symbol;Acc:MGI:1919847]	protein_coding	TTTATAAGGACATTAACCCTCTTGTCTACATATTTGGAGAGAATATGACTTTACTAGCCG	Auts2	autism susceptibility candidate 2	chr5:131913850-131913791	NM_177047	319974	AUTS2	8.20868	9.11535	8.91801	5.26048	5.3382	5.52906
A_51_P399845	-3.36733	7.28712	-10.8462	4.76652e-05	0.00447336	2.77652	ENSMUSG00000037225	Gencode.M18_pc	Fgf2	fibroblast growth factor 2 [Source:MGI Symbol;Acc:MGI:95516]	protein_coding	AGCGACCCACACGTCAAACTACAACTCCAAGCAGAAGAGAGAGGAGTTGTGTCTATCAAG	Fgf2	fibroblast growth factor 2	chr3:37247934-37295153	NM_008006	14173	FGF2	9.05814	9.05697	8.79725	5.16746	6.30577	5.33715
A_55_P2022773	-3.35919	9.96036	-10.8518	4.75298e-05	0.00447336	2.77953	ENSMUSG00000107705	Gencode.M18_pc	Gm45062	predicted gene 45062 [Source:MGI Symbol;Acc:MGI:5753638]	protein_coding	CGCTGAACAGTATTCAAGTTATATAATATGGCTTTACACAAGAAATGTGTGGCTTCTGTT	Glcci1	glucocorticoid induced transcript 1	chr6:8547424-8547483	NM_133236	170772	GM45062	11.6891	12.1425	11.0882	8.24679	7.95611	8.63941
A_51_P120398	-3.35448	7.05458	-17.9452	2.82934e-06	0.00133634	5.58987	ENSMUSG00000038997	Gencode.M18_pc	Asb17	ankyrin repeat and SOCS box-containing 17 [Source:MGI Symbol;Acc:MGI:1914022]	protein_coding	CCCTTCTAATTCCTACTCGTTTACAAAACTTCCTGAATTTAGAAAGCTAGCATGCATCTA	Asb17	ankyrin repeat and SOCS box-containing 17	chr3:153516456-153516514	NM_025758	66772	ASB17	8.63959	8.73735	8.81852	5.34373	5.03995	5.74835
A_51_P204740	-3.3531	14.4667	-9.56995	9.48236e-05	0.00598446	2.04259	ENSMUSG00000016494	Gencode.M18_pc	Cd34	CD34 antigen [Source:MGI Symbol;Acc:MGI:88329]	protein_coding	CCAGAGATGAGAGGATTGGGTGTATTCTCTTCTGAATAAACGTGATGAGTGAAAATGATG	Cd34	CD34 antigen	chr1:196787392-196787451	NM_133654	12490	CD34	16.1134	16.655	15.6613	13.0011	13.1671	12.2023
A_55_P1973033	-3.33878	10.0188	-5.6285	0.00154374	0.0252818	-1.02577	ENSMUSG00000001870	Gencode.M18_pc	Ltbp1	latent transforming growth factor beta binding protein 1 [Source:MGI Symbol;Acc:MGI:109151]	protein_coding	GGAAGTGGAAGAGCTTCATAGAGTTTATTAATATTGTGATGTGTAAAGTCAACCGAGAAA	Ltbp1	latent transforming growth factor beta binding protein 1	chr17:75790530-75790589	NM_019919	268977	LTBP1	11.4986	12.7649	10.8012	7.66734	8.28633	9.09462
A_51_P495242	-3.33809	12.2311	-11.9064	2.84221e-05	0.00340408	3.31847	ENSMUSG00000030742	Agilent eArray	Lat	linker for activation of T cells	protein_coding	AAGAGGAAGGGGTGGATGGAGAGGAAGCTCCCGACTATGAGAATCTACAGGAGCTTAACT	Lat	linker for activation of T cells	chr7:133507778-133507719	NM_010689	16797	LAT	14.0418	14.1408	13.5179	10.7749	10.0351	10.8762
A_55_P1981804	-3.33248	12.8962	-5.92424	0.001194	0.022099	-0.740021	ENSMUSG00000050675	Gencode.M18_pc	Gp1ba	glycoprotein 1b, alpha polypeptide [Source:MGI Symbol;Acc:MGI:1333744]	protein_coding	GGAGCACTATCCCTAAATATCATGAGTATTTTTTCCCTGTTTAACACTTTCTGGTTTTCT	Gp1ba	glycoprotein 1b, alpha polypeptide	chr11:70455461-70455520	NM_010326	14723	GP1BA	14.6512	15.3693	13.6666	10.6091	10.9656	12.1151
A_52_P467449	-3.3323	12.6518	-6.37901	0.000819264	0.0183428	-0.321572	ENSMUSG00000000320	Gencode.M18_pc	Alox12	arachidonate 12-lipoxygenase [Source:MGI Symbol;Acc:MGI:87998]	protein_coding	ACACTCCACATTAGTATTCTAACTACAGGGCACTAAATGTCTTGCTGTTATGAGGAACAA	Alox12	arachidonate 12-lipoxygenase	chr11:70055774-70055715	NM_007440	11684	ALOX12	14.5229	14.8733	13.5576	10.2782	10.7716	11.9072
A_52_P203316	-3.33217	8.39254	-6.81524	0.000581975	0.0154033	0.0575244	ENSMUSG00000051726	Gencode.M18_pc	Kcnf1	potassium voltage-gated channel, subfamily F, member 1 [Source:MGI Symbol;Acc:MGI:2687399]	protein_coding	ATACTCAGAGATCCAAAGTATCTTTTTGCTGCTCGTTCAGGAATAGAAGACCAAGCCCAG	Kcnf1	potassium voltage-gated channel, subfamily F, member 1	chr12:17179586-17179527	NM_201531	382571	KCNF1	9.80099	11.0633	9.31157	6.53956	6.40424	7.23557
A_55_P2143946	-3.31425	12.8964	-11.1209	4.15075e-05	0.00414229	2.92241	ENSMUSG00000025094	Gencode.M18_pc	Slc18a2	solute carrier family 18 (vesicular monoamine), member 2 [Source:MGI Symbol;Acc:MGI:106677]	protein_coding	TGCTTTTGAGGCTTCAGTTTCAGTAAAAACGATCAGCAAAGGCATGCCTGTTACTGCTCT	Slc18a2	solute carrier family 18 (vesicular monoamine), member 2	chr19:59370106-59370165	NM_172523	214084	SLC18A2	14.4418	14.6835	14.5354	11.7976	10.6161	11.3043
A_52_P671794	-3.30936	7.70269	-8.15066	0.000226065	0.00935935	1.09903	ENSMUSG00000032377	Gencode.M18_pc	Plscr4	phospholipid scramblase 4 [Source:MGI Symbol;Acc:MGI:2143267]	protein_coding	TGCGTGGTAAACAACTCATTATATGCAATCAGTAAGAAGACACAGTAAATTTGTTGCTTC	Plscr4	phospholipid scramblase 4	chr9:92386526-92386585	NM_178711	235527	PLSCR4	9.44247	10.0455	8.58412	5.59228	6.29358	6.25818
A_55_P2009086	-3.30754	12.2146	-18.7152	2.22924e-06	0.00119424	5.80683	ENSMUSG00000027230	Gencode.M18_pc	Creb3l1	cAMP responsive element binding protein 3-like 1 [Source:MGI Symbol;Acc:MGI:1347062]	protein_coding	ATTTGCCAAACTGCTCCTCCACCAGCTCAGCACATGCTTTAAGAAGGCAAAATTAAAAAA	Creb3l1	cAMP responsive element binding protein 3-like 1	chr2:91822565-91822506	NM_011957	26427	CREB3L1	14.1644	13.7267	13.7141	10.3318	10.5605	10.7903
A_55_P2444515	-3.29661	8.48316	-7.21331	0.000432454	0.0130878	0.385818	ENSMUSG00000089945	Gencode.M18_pc	Pakap	paralemmin A kinase anchor protein [Source:MGI Symbol;Acc:MGI:5141924]	protein_coding	TAATTAGGTGCCCCGAGTTTCTGAATGAGAAAATGTTTCATTTCTGGTGGGGAAGGGGAG	Pakap	paralemmin A kinase anchor protein	chr4:57907544-57907603	NM_001304544	677884	PAKAP	10.1769	11.0346	9.18286	7.00707	6.81573	6.68178
A_51_P339793	-3.28088	10.3744	-12.9702	1.76332e-05	0.00276529	3.80995	ENSMUSG00000026069	Gencode.M18_pc	Il1rl1	interleukin 1 receptor-like 1 [Source:MGI Symbol;Acc:MGI:98427]	protein_coding	CTCTGTAACAGGATCTTTTGTCTAGATTTCTGAGTGTACTTTAGTTCACGTTTGTATTAG	Il1rl1	interleukin 1 receptor-like 1	chr1:40504769-40504828	NM_010743	17082	IL1RL1	11.8615	12.4833	11.6997	9.01777	8.42395	8.76018
A_52_P661	-3.27838	9.29047	-4.76079	0.0034857	0.0402785	-1.93185	ENSMUSG00000029765	Gencode.M18_pc	Plxna4	plexin A4 [Source:MGI Symbol;Acc:MGI:2179061]	protein_coding	CTCACCTTGAATACCAACCTTTTGAAAGAAGAAAGCAAAATATGCCTTTAGACGACAGTG	Plxna4	plexin A4	chr6:32094661-32094602	NM_175750	243743	PLXNA4	10.5565	12.0776	10.1549	6.71492	7.53175	8.70716
A_55_P1987645	-3.27644	7.91009	-10.981	4.45203e-05	0.00428111	2.84859	ENSMUSG00000028456	Gencode.M18_pc	Unc13b	unc-13 homolog B [Source:MGI Symbol;Acc:MGI:1342278]	protein_coding	CCAGTCAACACACGAAACAAACCAAGCATCTTTGCTGTTTTTAATTATTATATGTGCCAT	Unc13b	unc-13 homolog B (C. elegans)	chr4:43277637-43277696	NM_021468	22249	UNC13B	9.19233	10.2218	9.2308	6.24504	6.12148	6.44908
A_55_P1992617	-3.27219	14.1224	-7.6294	0.00032158	0.0112448	0.712278	ENSMUSG00000030159	Gencode.M18_pc	Clec1b	C-type lectin domain family 1, member b [Source:MGI Symbol;Acc:MGI:1913287]	protein_coding	CATTCCGTTGGATTGGATTATCACGCCAGAACTCTAAGAAAGACTGGATGTGGGAGGATA	Clec1b	C-type lectin domain family 1, member b	chr6:129353604-129353663	NM_019985	56760	CLEC1B	15.6286	16.2479	15.3989	11.9155	12.188	13.3554
A_55_P2082180	-3.26067	11.6257	-9.30482	0.000110525	0.00645787	1.87737	ENSMUSG00000028965	Gencode.M18_pc	Tnfrsf9	tumor necrosis factor receptor superfamily, member 9 [Source:MGI Symbol;Acc:MGI:1101059]	protein_coding	CGCGCACCTCATCCAAGTCTCTTCTAACGCTAACATATTTGTCTTTACCTTTTTTAAATC	Tnfrsf9	tumor necrosis factor receptor superfamily, member 9	chr4:150319101-150319160	NM_011612	21942	TNFRSF9	13.3934	12.4844	13.8904	9.9653	10.0798	9.94111
A_51_P256246	-3.25863	12.6593	-11.0068	4.39451e-05	0.00428111	2.8623	ENSMUSG00000020577	Gencode.M18_pc	Tspan13	tetraspanin 13 [Source:MGI Symbol;Acc:MGI:1913359]	protein_coding	AGTCAAGGGCAAAGGAAGATACCATTTGGGAAATGCTTTGGTGTGTAACATCTTCAGCTC	Tspan13	tetraspanin 13	chr12:36741672-36741613	NM_025359	66109	TSPAN13	13.92	14.9178	14.028	11.1009	10.7529	11.2361
A_55_P2032147	-3.2569	7.97214	-6.77242	0.000601367	0.0156673	0.021232	ENSMUSG00000000126	Gencode.M18_pc	Wnt9a	wingless-type MMTV integration site family, member 9A [Source:MGI Symbol;Acc:MGI:2446084]	protein_coding	CCTGAGTGACTGCAGAGAATGTATTTATTTAACAGCTTTGTGTAACAAAACCAGAAACAA	Wnt9a	wingless-type MMTV integration site family, member 9A	chr11:59146953-59147012	NM_139298	216795	WNT9A	10.3527	8.50734	9.94175	6.36246	6.54272	6.12589
A_52_P220810	-3.25585	8.97816	-4.41243	0.00497134	0.0492977	-2.32604	ENSMUSG00000020601	Gencode.M18_pc	Trib2	tribbles pseudokinase 2 [Source:MGI Symbol;Acc:MGI:2145021]	protein_coding	ACTCTGGCTTTTCTATTGCTGTATGATACAGAACTCTTTTGGCATAAATATTTGTGTTCC	Trib2	tribbles pseudokinase 2	chr12:15799068-15799009	NM_144551	217410	TRIB2	10.7968	11.1254	9.89604	6.79231	8.9317	6.3267
A_55_P2000489	-3.25553	10.4942	-12.3267	2.3428e-05	0.00317867	3.51852	ENSMUSG00000025094	Gencode.M18_pc	Slc18a2	solute carrier family 18 (vesicular monoamine), member 2 [Source:MGI Symbol;Acc:MGI:106677]	protein_coding	CTGTTACTGCTCTCCAAAGAAAAAAGAAAAATTGCAGAACTATTTGGAGAGGAAAGGATA	Slc18a2	solute carrier family 18 (vesicular monoamine), member 2	chr19:59370153-59370212	NM_172523	214084	SLC18A2	12.1826	12.3826	11.8008	9.24204	8.37616	8.98123
A_55_P1985337	-3.25266	11.6248	-33.5997	7.88496e-08	0.00024776	8.34688	ENSMUSG00000041831	Gencode.M18_pc	Sytl3	synaptotagmin-like 3 [Source:MGI Symbol;Acc:MGI:1933367]	protein_coding	GGGAGGCTACTGTCAACAGATAGATGTGGAAATGTTCTGATCTCAATAAACGCTCAACAC	Sytl3	synaptotagmin-like 3	chr17:6942330-6942389	NM_031395	83672	SYTL3	13.4182	13.1456	13.1897	10.0545	9.9815	9.95941
A_51_P490747	-3.244	6.93103	-10.8867	4.66937e-05	0.00441651	2.79828	ENSMUSG00000078307	Gencode.M18_pc	AI593442	expressed sequence AI593442 [Source:MGI Symbol;Acc:MGI:2143099]	protein_coding	CTTAGCTTTAATTGAGAGACAGTGCATTATTCGGGTTGCTTTACCCATTTGAGGAAGGAT	AI593442	expressed sequence AI593442	chr9:52481388-52481329	NM_001286641	330941	AI593442	8.16725	8.57152	8.92031	4.97929	5.09529	5.8525
A_51_P485161	-3.24134	6.84684	-9.91737	7.80158e-05	0.00551589	2.25211	ENSMUSG00000025867	Gencode.M18_pc	Cplx2	complexin 2 [Source:MGI Symbol;Acc:MGI:104726]	protein_coding	TCCCCACTTTGTATGATGCAAATGCTAAGATGATGTACAAAACCAACCATGATGACAAAG	Cplx2	complexin 2	chr13:54485200-54485259	NM_009946	12890	CPLX2	8.42249	9.15456	7.8255	5.21341	5.27187	5.19323
A_51_P288916	-3.23463	11.2067	-9.81449	8.26022e-05	0.00564594	2.19087	ENSMUSG00000036019	Gencode.M18_pc	Tmtc2	transmembrane and tetratricopeptide repeat containing 2 [Source:MGI Symbol;Acc:MGI:1914057]	protein_coding	AGGGATTTATGGTGGATCATTGCAGACAGTGCTAAAAATGTAGAGCACAAGACAAGTTTA	Tmtc2	transmembrane and tetratricopeptide repeat containing 2	chr10:104624918-104624859	NM_177368	278279	TMTC2	12.5156	13.5849	12.3714	9.47003	9.59988	9.69821
A_52_P459564	-3.231	13.5971	-8.65946	0.000163217	0.00806145	1.45462	ENSMUSG00000034664	Gencode.M18_pc	Itga2b	integrin alpha 2b [Source:MGI Symbol;Acc:MGI:96601]	protein_coding	ACCCGGATAGGAATCACAATGCTGGTGAGTGTGGAGAACCTGGAAGAAGCTGGCGAGTCC	Itga2b	integrin alpha 2b	chr11:102319661-102319453	NM_010575	16399	ITGA2B	15.6544	15.357	14.6264	11.6668	11.6588	12.6192
A_52_P198885	-3.22261	9.15433	-5.95875	0.00115947	0.0218889	-0.707394	ENSMUSG00000024552	Agilent eArray	Slc14a2	solute carrier family 14 (urea transporter), member 2	protein_coding	CCAACATCCAATCATAGTGTCAACAAATGTCTTTGCTTATGTAATCTTCAAAATCAGTCC	Slc14a2	solute carrier family 14 (urea transporter), member 2	chr18:78342970-78342911	NM_207651	27411	SLC14A2	10.735	11.5536	10.0083	6.91535	7.2622	8.4515
A_55_P2074942	-3.22184	12.2891	-6.36783	0.000826673	0.018429	-0.331565	ENSMUSG00000020838	Gencode.M18_pc	Slc6a4	solute carrier family 6 (neurotransmitter transporter, serotonin), member 4 [Source:MGI Symbol;Acc:MGI:96285]	protein_coding	CTCCGGGCCCATTACAAACTATATAAATGGCCTCTAATTTTTCTTACATTAAACAGATTC	Slc6a4	solute carrier family 6 (neurotransmitter transporter, serotonin), member 4	chr11:76845777-76845836	NM_010484	15567	SLC6A4	13.9242	14.5117	13.2642	10.0593	10.3456	11.6297
A_51_P341918	-3.21807	12.2115	-9.02336	0.00013061	0.00713325	1.6967	ENSMUSG00000022010	Gencode.M18_pc	Tsc22d1	TSC22 domain family, member 1 [Source:MGI Symbol;Acc:MGI:109127]	protein_coding	ACTGCTTTGTGGCAAAAACCACACCTGAAGAAATTTTAAGAATTTGGCCCAGTTAGTCAC	Tsc22d1	TSC22 domain family, member 1	chr14:76907276-76907335	NM_009366	21807	TSC22D1	13.9492	14.1183	13.3942	10.0963	10.4116	11.2996
A_55_P2156930	-3.21757	10.5763	-22.6703	7.48645e-07	0.000695395	6.74547	ENSMUSG00000041831	Gencode.M18_pc	Sytl3	synaptotagmin-like 3 [Source:MGI Symbol;Acc:MGI:1933367]	protein_coding	ACAGTCCAAGCTTCAGTGGCACAGAGTCCTCTCCAGCCCAAACCTGTGGACAGACATGAC	Sytl3	synaptotagmin-like 3	chr17:6942110-6942169	NM_031395	83672	SYTL3	12.4314	11.9218	12.2021	9.04461	8.90033	8.95769
A_55_P2080530	-3.20906	7.38303	-12.3286	2.3408e-05	0.00317867	3.5194	ENSMUSG00000045102	Gencode.M18_pc	Poln	DNA polymerase N [Source:MGI Symbol;Acc:MGI:2675617]	protein_coding	CAGAAGTACAAGAAAATCAAGGACTTTGCCCAGACAGTTATTGGCCAGTGTCACAGTGCA	Poln	DNA polymerase N	chr5:34367015-34366956	NM_181857	272158	POLN	8.58146	9.57739	8.80381	5.79592	5.71955	5.82003
A_55_P1980539	-3.20835	11.8919	-12.4613	2.2051e-05	0.0031187	3.58092	ENSMUSG00000045031	Gencode.M18_pc	Cetn4	centrin 4 [Source:MGI Symbol;Acc:MGI:2677454]	protein_coding	CTTGGTGTCTAATCTGTGCCAGAAGTTATATGTCCCTACCAATGTCATTAAATCTGTAGT	Cetn4	centrin 4	chr3:37207900-37207841	NM_145825	207175	CETN4	13.3443	13.9725	13.1714	9.93895	10.4339	10.4903
A_66_P111011	-3.20814	7.86726	-7.24961	0.000421187	0.0129634	0.414957	ENSMUSG00000015619	Gencode.M18_pc	Gata3	GATA binding protein 3 [Source:MGI Symbol;Acc:MGI:95663]	protein_coding	TTAAGGAATATAGGGGGATTAAAGTATGGAGATACAGAAGAAACCACTAAGTCTGATGTC	Gata3	GATA binding protein 3	chr2:9779610-9779551	NM_008091	14462	GATA3	8.77053	9.28051	10.363	6.21502	6.69498	5.87958
A_52_P409769	-3.20688	12.6697	-6.63015	0.000671377	0.016489	-0.100772	ENSMUSG00000005611	Gencode.M18_pc	Mrvi1	MRV integration site 1 [Source:MGI Symbol;Acc:MGI:1338023]	protein_coding	CAGCCTTGTGTTTCCAGACGTAACTGTGAAATGGAATAAAAGTTTCCCACTCAAGATGCC	Mrvi1	MRV integration site 1	chr7:118012134-118012075	NM_194464	17540	MRVI1	14.3061	14.8838	13.6296	10.4173	10.858	11.9237
A_52_P179068	-3.20651	11.0556	-7.20672	0.000434538	0.0130961	0.380513	ENSMUSG00000028005	Gencode.M18_pc	Gucy1b1	guanylate cyclase 1, soluble, beta 1 [Source:MGI Symbol;Acc:MGI:1860604]	protein_coding	TCATTTTAATTCTAGCATAGAATGGACTGAATTCCTGTTGGTATATTTGGCCTATCATCC	Gucy1b3	guanylate cyclase 1, soluble, beta 3	chr3:81836201-81836142	NM_017469	54195	GUCY1B1	12.6262	13.4019	11.9485	9.14774	9.11476	10.0945
A_55_P1962299	-3.20508	15.863	-6.22678	0.00092714	0.0194367	-0.458909	ENSMUSG00000069917	Agilent eArray	Hba-a2	hemoglobin alpha, adult chain 2	protein_coding	TTCTTCTCTCCCTTGCACCTGTACCTCTTGGTCTTTGAATAAAGCCTGAGTAGGAAGAAG	Hba-a2	hemoglobin alpha, adult chain 2	chr11:32197245-32197304	NM_001083955	110257	HBA-A2	17.2779	17.0554	18.0633	13.4381	14.0884	15.2548
A_52_P307761	-3.2013	9.20214	-7.31943	0.000400454	0.0126587	0.470651	ENSMUSG00000040009	Gencode.M18_pc	Gnaz	guanine nucleotide binding protein, alpha z subunit [Source:MGI Symbol;Acc:MGI:95780]	protein_coding	CGCGGTCTACATCCAACGTCAGTTCGAGGACCTCAACCGCAACAAGGAGACCAAGGAGAT	Gnaz	guanine nucleotide binding protein, alpha z subunit	chr10:74477789-74477848	NM_010311	14687	GNAZ	10.9678	11.3748	10.0658	7.14763	7.37419	8.28265
A_55_P2125811	-3.19655	9.24473	-7.68786	0.000308807	0.0110786	0.756852	ENSMUSG00000001946	Agilent eArray	Esam	endothelial cell-specific adhesion molecule	protein_coding	GTTGTAGCAGGGGGATAGGAAAGACATTTTAAAACCTGACTTGAAATTGATGTTTTTGTT	Esam	endothelial cell-specific adhesion molecule	chr9:37345795-37345854	NM_027102	69524	ESAM	10.8328	11.3779	10.3183	7.04458	7.52591	8.36888
A_52_P325527	-3.18705	7.85278	-19.3775	1.82963e-06	0.00108656	5.98357	ENSMUSG00000034488	Gencode.M18_pc	Edil3	EGF-like repeats and discoidin I-like domains 3 [Source:MGI Symbol;Acc:MGI:1329025]	protein_coding	TTATTCTAATCATTTGTCACAGACACTAATTCCAACTTTAGGGTTGACTTTCTCTCTGTG	Edil3	EGF-like repeats and discoidin I-like domains 3	chr13:89461799-89461858	NM_010103	13612	EDIL3	9.38565	9.41636	9.53689	5.91026	6.48387	6.38362
A_52_P120612	-3.18386	8.16495	-6.73865	0.000617192	0.0158286	-0.00753483	ENSMUSG00000042351	Gencode.M18_pc	Grap2	GRB2-related adaptor protein 2 [Source:MGI Symbol;Acc:MGI:1333842]	protein_coding	GGGGGTAAAGCTGAACTTTATAATGACACATACATGCATACATGTGCATGTGTGCCCGAG	Grap2	GRB2-related adaptor protein 2	chr15:80479094-80479153	NM_010815	17444	GRAP2	9.76367	10.49	9.01697	6.05755	6.37708	7.28445
A_51_P260683	-3.17067	13.4138	-27.2849	2.59793e-07	0.00039283	7.55909	ENSMUSG00000026358	Gencode.M18_pc	Rgs1	regulator of G-protein signaling 1 [Source:MGI Symbol;Acc:MGI:1354694]	protein_coding	CCCTTGGATAACCAGTCCAAAAGTATATAGCGCAAATAACAGTTGCTATTATTGACATGA	Rgs1	regulator of G-protein signaling 1	chr1:146092021-146091962	NM_015811	50778	RGS1	14.9325	14.9518	15.1132	11.9319	11.6223	11.9312
A_51_P520306	-3.16966	10.5185	-7.33022	0.000397357	0.0126124	0.479212	ENSMUSG00000000320	Gencode.M18_pc	Alox12	arachidonate 12-lipoxygenase [Source:MGI Symbol;Acc:MGI:87998]	protein_coding	TCTTGGCTAAGATCTGGGTCCGAAATTCAGATTTCCAACTGCAGGAGCTCCAATTCCATT	Alox12	arachidonate 12-lipoxygenase	chr11:70063688-70063629	NM_007440	11684	ALOX12	12.365	12.5168	11.4284	8.34564	8.79859	9.65688
A_55_P2046245	-3.16814	6.79146	-6.58036	0.000698065	0.0168475	-0.143984	ENSMUSG00000022528	Gencode.M18_pc	Hes1	hes family bHLH transcription factor 1 [Source:MGI Symbol;Acc:MGI:104853]	protein_coding	TTAAAATATCTTCCTTTGGGGAAGTTTATTTGAGAAAATATAATAAAAGAGTGAAGGCTT	Hes1	hairy and enhancer of split 1 (Drosophila)	chr16:30067820-30067879	NM_008235	15205	HES1	8.06473	9.48456	7.57732	5.19893	5.15974	5.26351
A_55_P2160686	-3.16794	12.0773	-9.7316	8.6527e-05	0.0057929	2.14104	ENSMUSG00000022010	Gencode.M18_pc	Tsc22d1	TSC22 domain family, member 1 [Source:MGI Symbol;Acc:MGI:109127]	protein_coding	TCTTCTCCTTCCCTTCAAAGAACTCGGAGAGGCCAGAAACAAGACTGCAATGGGGGGCGG	Tsc22d1	TSC22 domain family, member 1	chr14:76906896-76906955	NM_001310646	21807	TSC22D1	13.759	13.9258	13.2991	10.064	10.2636	11.1525
A_55_P2077313	-3.15968	8.32036	-11.2476	3.89848e-05	0.00401212	2.98833	ENSMUSG00000003534	Gencode.M18_pc	Ddr1	discoidin domain receptor family, member 1 [Source:MGI Symbol;Acc:MGI:99216]	protein_coding	CCCCTGTCCTAGGCAGGTAATAATAAAAGTTGAGTTGTTTTTTGTTTTTTGTTTTTCCAC	Ddr1	discoidin domain receptor family, member 1	chr17:35818572-35818513	NM_007584	12305	DDR1	9.88275	10.2662	9.55164	6.45657	6.51384	7.25116
A_55_P2039878	-3.14881	8.94981	-8.15287	0.000225737	0.00935645	1.10062	ENSMUSG00000050761	Gencode.M18_pc	Gp1bb	glycoprotein Ib, beta polypeptide [Source:MGI Symbol;Acc:MGI:107852]	protein_coding	TTATTTCTGGCCAGGCGGCAGAATTGTGGTCTGTTGCTGTAGACTCAGGCAGGCTCTCGG	Gp1bb	glycoprotein Ib, beta polypeptide	chr16:18621776-18621717	NM_010327	14724	GP1BB	10.3719	11.1553	10.0454	6.92944	7.20699	7.98977
A_55_P2010116	-3.13026	13.8227	-11.7261	3.09376e-05	0.003557	3.23023	ENSMUSG00000024511	Gencode.M18_pc	Rab27b	RAB27B, member RAS oncogene family [Source:MGI Symbol;Acc:MGI:1931295]	protein_coding	CTCAGCTCAGCAGAACTATAGCCAATGTTTTGTTTTGTTTTCCTGAATGCTATCTTATTT	Rab27b	RAB27B, member RAS oncogene family	chr18:70143544-70143485	NM_001082553	80718	RAB27B	15.2641	15.7597	15.1396	12.1187	11.9157	12.7382
A_55_P2067451	-3.12982	8.08725	-18.3896	2.46271e-06	0.00123909	5.71666	ENSMUSG00000096505	Gencode.M18_pc	Trav4d-4	T cell receptor alpha variable 4D-4 [Source:MGI Symbol;Acc:MGI:2684872]	TR_V_gene	CAACAGAATTCCAGGGGCAGCCTCATCAATCTGTTCTACTTGGCTTCAGGAACAAAGGAG	NA	NA	chr14:54303687-54303746	M73262	NA	TRAV4D-4	9.55591	9.95551	9.44505	6.35758	6.73148	6.47795
A_55_P2007919	-3.1202	7.22383	-6.67675	0.000647458	0.0162429	-0.060571	ENSMUSG00000071551	Gencode.M18_pc	Akr1c19	aldo-keto reductase family 1, member C19 [Source:MGI Symbol;Acc:MGI:2653678]	protein_coding	CCAGTCCGGAACATAAGTCACTACATTTTCATCATTCTTTGACATTGTTGTAATACTTGT	Akr1c19	aldo-keto reductase family 1, member C19	chr13:4247522-4247581	NM_001013785	432720	AKR1C19	7.73332	9.58493	9.03355	5.82593	5.52692	5.63834
A_52_P549279	-3.11944	7.42448	-11.4551	3.52277e-05	0.00376702	3.09459	ENSMUSG00000005947	Gencode.M18_pc	Itgae	integrin alpha E, epithelial-associated [Source:MGI Symbol;Acc:MGI:1298377]	protein_coding	ATAGGACAGCAGATATCACTGTGACCATCTCCAATTCCAATGAGAAGTCTTTGGCCAGAG	Itgae	integrin alpha E, epithelial-associated	chr11:72945236-72946221	NM_172944	16407	ITGAE	9.24619	8.46901	9.2374	5.73113	5.62953	6.23362
A_55_P2056926	-3.11799	8.82983	-6.41216	0.000797734	0.0180391	-0.292018	ENSMUSG00000033763	Gencode.M18_pc	Mtss1l	metastasis suppressor 1-like [Source:MGI Symbol;Acc:MGI:3039591]	protein_coding	TGCTACAAAGTAACAAATGCACTGTGAAGATCCCAGTATTAATAAAGCAGTACTGTAGTT	Mtss1l	metastasis suppressor 1-like	chr8:113265239-113265298	NM_198625	244654	MTSS1L	10.6532	10.8743	9.63893	6.53839	7.22676	8.04736
A_55_P2013019	-3.11272	7.01411	-8.61001	0.000168342	0.00817645	1.42096	ENSMUSG00000038668	Gencode.M18_pc	Lpar1	lysophosphatidic acid receptor 1 [Source:MGI Symbol;Acc:MGI:108429]	protein_coding	CAACCTGCTGGCTATTGCTATCGAGAGGCACATCACGGTTTTCCGCATGCAGCTCCATAC	Lpar1	lysophosphatidic acid receptor 1	chr4:58499731-58499672	NM_172989	14745	LPAR1	8.49869	9.32891	7.88381	5.33563	5.41495	5.62269
A_55_P2078955	-3.11075	6.85494	-15.7612	5.89645e-06	0.00164311	4.89813	ENSMUSG00000030762	Gencode.M18_pc	Aqp8	aquaporin 8 [Source:MGI Symbol;Acc:MGI:1195271]	protein_coding	TCTCTTCATCTTCATCGGATGTCTATCGGTCATTGAGAATAGTCCGAATACTGGGCTCCT	Aqp8	aquaporin 8	chr7:130606210-130606269	NM_007474	11833	AQP8	8.15021	8.5364	8.54433	5.04269	5.20124	5.65474
A_55_P1962011	-3.11026	13.837	-7.22173	0.000429809	0.0130623	0.392591	ENSMUSG00000030159	Gencode.M18_pc	Clec1b	C-type lectin domain family 1, member b [Source:MGI Symbol;Acc:MGI:1913287]	protein_coding	GGATGTCAGATAAGTGCTTGATCATGCAATAAAAGATCTGGACAAAAGAACTCCGCATTC	Clec1b	C-type lectin domain family 1, member b	chr6:129355286-129355345	NM_019985	56760	CLEC1B	15.2931	15.8494	15.0339	11.6093	12.0969	13.1394
A_51_P153995	-3.10166	13.7729	-7.00998	0.000502417	0.0142402	0.220153	ENSMUSG00000030054	Gencode.M18_pc	Gp9	glycoprotein 9 (platelet) [Source:MGI Symbol;Acc:MGI:1860137]	protein_coding	GCTGTCCAGTCTAAAGACCTGGGTTTTATCCCCAGGAGAGACCTAAATCTCACCTCCACA	Gp9	glycoprotein 9 (platelet)	chr6:87729650-87729709	NM_018762	54368	GP9	15.1767	15.9893	14.8053	11.7177	11.9533	12.9954
A_55_P2029294	-3.08905	11.207	-13.6254	1.33805e-05	0.00241155	4.08967	ENSMUSG00000045031	Gencode.M18_pc	Cetn4	centrin 4 [Source:MGI Symbol;Acc:MGI:2677454]	protein_coding	CTTGGCCCCCAGATCCAGATGAAATTGTTTTTAAAAACAATCTGAAAATGGTATTTTTCC	Cetn4	centrin 4	chr3:37207711-37207652	NM_145825	207175	CETN4	12.5553	13.1989	12.5003	9.39277	9.79986	9.79467
A_55_P2124791	-3.07539	12.5059	-7.58918	0.000330723	0.0114291	0.681432	ENSMUSG00000001435	Gencode.M18_pc	Col18a1	collagen, type XVIII, alpha 1 [Source:MGI Symbol;Acc:MGI:88451]	protein_coding	GGGATACAATCCTGTATAGTTCCCATTTTTATGTAATCCTCAAGAAATAAAAGGAAGCCA	Col18a1	collagen, type XVIII, alpha 1	chr10:76515849-76515790	NM_001109991	12822	COL18A1	13.9435	14.6881	13.4992	10.3817	10.9899	11.5331
A_52_P559808	-3.06734	9.50558	-6.61849	0.000677522	0.0165725	-0.110871	ENSMUSG00000059495	Gencode.M18_pc	Arhgef12	Rho guanine nucleotide exchange factor (GEF) 12 [Source:MGI Symbol;Acc:MGI:1916882]	protein_coding	TGCTCTAATTATCCAGATGCACCTTTGTAAAAAGCTCTTTTATGAATTAGCTGATAAGGC	Arhgef12	Rho guanine nucleotide exchange factor (GEF) 12	chr9:42772092-42772033	NM_027144	69632	ARHGEF12	10.8396	11.8234	10.4547	7.27998	8.0859	8.54985
A_55_P1974830	-3.0661	8.90049	-10.3316	6.23164e-05	0.0050616	2.49214	ENSMUSG00000004347	Gencode.M18_pc	Pde1c	phosphodiesterase 1C [Source:MGI Symbol;Acc:MGI:108413]	protein_coding	CGGTAAAAATAAGGCAGACAAGAAGGATCACTCCAACACCGGAAATGAGTCAAAGAAAAC	Pde1c	phosphodiesterase 1C	chr6:56073050-56072991	NM_001159953	18575	PDE1C	10.1945	10.78	10.3262	6.88648	7.91772	7.29813
A_55_P1994219	-3.0639	8.50402	-12.4022	2.26441e-05	0.00315338	3.5536	ENSMUSG00000041831	Gencode.M18_pc	Sytl3	synaptotagmin-like 3 [Source:MGI Symbol;Acc:MGI:1933367]	protein_coding	CTGCTGACCTGGACATATTTTTTCTGGGGAAATTTTGCTACCCTAAGTCTTAGGGCTCTC	NA	NA	chr17:6672645-6672704	XM_011246182	NA	SYTL3	10.5045	9.88679	9.71664	7.18673	7.06621	6.66326
A_55_P1985189	-3.06249	7.85498	-7.91883	0.00026378	0.0101304	0.929949	ENSMUSG00000044867	Gencode M18	Gimap1os	GTPase, IMAP family member 1, opposite strand [Source:MGI Symbol;Acc:MGI:3781523]	processed_transcript	GCCTAGCATATACAAAGTCCTAGGGTCTATCCAGTACCAAAGAAAACAAAAAAGAAAAAT	Gimap1os	GTPase, IMAP family member 1, opposite strand	chr6:48688531-48688472	AK134205	100041450	GIMAP1OS	9.50235	10.0994	8.55689	6.15366	6.46105	6.3565
A_51_P140237	-3.0467	9.70883	-22.9177	7.03704e-07	0.000688983	6.79583	ENSMUSG00000008136	Agilent eArray	Fhl2	four and a half LIM domains 2	protein_coding	TGTGTTATGAACTTGAATGTATTTTCACGGGAGAGCTGGGATTTGCAGCTTTGTGACTTC	Fhl2	four and a half LIM domains 2	chr1:43180053-43179994	NM_010212	14200	FHL2	11.1098	11.3611	11.2256	8.37684	7.9615	8.2181
A_55_P1986291	-3.03554	8.63218	-10.1378	6.91494e-05	0.00528482	2.38116	ENSMUSG00000039851	Gencode.M18_pc	4932438H23Rik	RIKEN cDNA 4932438H23 gene [Source:MGI Symbol;Acc:MGI:1921637]	protein_coding	GAGGAACCACAGCAATTACTAAATTGTTCACCATTACATAAAGAAAAGTTCCCCTGTAAT	4932438H23Rik	RIKEN cDNA 4932438H23 gene	chr16:91054258-91054199	NM_028905	74387	4932438H23RIK	10.3833	10.5218	9.54472	7.40729	6.80427	7.13167
A_52_P154101	-3.03346	6.78669	-10.4763	5.77229e-05	0.00493176	2.5736	ENSMUSG00000030669	Gencode.M18_pc	Calca	calcitonin/calcitonin-related polypeptide, alpha [Source:MGI Symbol;Acc:MGI:2151253]	protein_coding	TATTGTGCATCGTGTTGTATGTGACTCTGTATCCAATAAACATGACAGCATGGTTCTGGC	Calca	calcitonin/calcitonin-related polypeptide, alpha	chr7:121775263-121775204	NM_001033954	12310	CALCA	7.68249	8.4622	8.76557	5.24799	5.0993	5.46261
A_55_P2129172	-3.02271	6.90435	-10.4921	5.72438e-05	0.00492568	2.58246	ENSMUSG00000025170	Gencode.M18_pc	Rab40b	Rab40B, member RAS oncogene family [Source:MGI Symbol;Acc:MGI:2183451]	protein_coding	CAGCATTGTTTCAACAGATTAGCAAGGAGAGAGGTATTTCAGTAAAGGAGAAGTAAAAAC	Rab40b	Rab40B, member RAS oncogene family	chr11:121217551-121217492	NM_139147	217371	RAB40B	8.47477	8.92519	7.84715	5.18799	5.36433	5.62667
A_55_P2079659	-3.02133	10.5317	-7.82265	0.000281536	0.0104927	0.858445	ENSMUSG00000028185	Gencode.M18_pc	Dnase2b	deoxyribonuclease II beta [Source:MGI Symbol;Acc:MGI:1913283]	protein_coding	CACTAGGTTTAACTGTCTCCCAACAGATCACTTCAGTCTAGAGAACAATACATCCCTTAC	Dnase2b	deoxyribonuclease II beta	chr3:146244010-146243951	XR_867221	56629	DNASE2B	11.4469	12.8258	11.8544	8.61668	9.16638	9.28
A_52_P33382	-3.01171	8.41801	-5.087	0.00253773	0.0336623	-1.57888	ENSMUSG00000084893	Gencode M18	Hba-ps4	hemoglobin alpha, pseudogene 4 [Source:MGI Symbol;Acc:MGI:96018]	unprocessed_pseudogene	CATTCTGACTATGGCGCAGAAGCCATAGGACGGTTGTTTGAGAGCTTCCCCACCACCAAG	NA	NA	chr17:26423916-26423752	KY467421	NA	HBA-PS4	9.44932	9.16364	11.1586	6.37326	6.8415	7.52169
A_51_P340699	-3.00955	8.46682	-12.0478	2.66141e-05	0.00334165	3.38667	ENSMUSG00000029641	Gencode.M18_pc	Rasl11a	RAS-like, family 11, member A [Source:MGI Symbol;Acc:MGI:1916145]	protein_coding	ACTACGAAGACGTCTGTGATGTGTTCCAACATCTCTGCAAAGAAGTGATCAAGGTGCACA	Rasl11a	RAS-like, family 11, member A	chr5:147658864-147658923	NM_026864	68895	RASL11A	10.0228	9.93687	9.9551	7.06044	6.41928	7.40643
A_55_P2038217	-3.00793	6.89204	-9.95624	7.63605e-05	0.00546647	2.27508	ENSMUSG00000038094	Gencode.M18_pc	Atp13a4	ATPase type 13A4 [Source:MGI Symbol;Acc:MGI:1924456]	protein_coding	CCAAAGGGTTGGCAGATATCAGAAGGAAAACATATCTTCTTAGAATAAGTCTTTCTCAAA	Atp13a4	ATPase type 13A4	chr16:29396233-29396174	NM_001164612	224079	ATP13A4	7.97621	8.99473	8.21708	5.26813	5.15911	5.737
A_51_P514256	-3.00439	8.51257	-26.5139	3.06077e-07	0.000410665	7.43984	ENSMUSG00000045136	Gencode.M18_pc	Tubb2b	tubulin, beta 2B class IIB [Source:MGI Symbol;Acc:MGI:1920960]	protein_coding	GGCTAAAATCACATAAACCTTTGTGTCCTAACGGTGTCCTCTTTTCTTTCTCTTCCTTTC	Tubb2b	tubulin, beta 2B class IIB	chr13:34219120-34219061	NM_023716	73710	TUBB2B	10.0886	10.1156	9.84009	6.89523	7.14449	6.99141
A_55_P1982291	-2.99864	10.6925	-6.61492	0.000679415	0.0165946	-0.113964	ENSMUSG00000056025	Gencode.M18_pc	Clca3a1	chloride channel accessory 3A1 [Source:MGI Symbol;Acc:MGI:1316732]	protein_coding	CTACACACTCAAAGGCTGCCTGTCAACAATTGTAATATAGAAGTTCATATTCAAAGTTGA	Clca3a1	chloride channel accessory 3A1	chr3:144393509-144393450	NM_009899	12722	CLCA3A1	11.912	12.9149	11.7485	8.73964	8.85615	9.9837
A_55_P2107499	-2.99683	7.16239	-15.6935	6.04143e-06	0.00164554	4.87468	ENSMUSG00000038296	Gencode.M18_pc	Galnt18	polypeptide N-acetylgalactosaminyltransferase 18 [Source:MGI Symbol;Acc:MGI:2446239]	protein_coding	AGAAGTGCTCGGGACAACACTGGACTATCACCAATGTCCTGAGGAGCCTGGTGTCCTGAC	Galnt18	UDP-N-acetyl-alpha-D-galactosamine:polypeptide N-acetylgalactosaminyltransferase 18	chr7:118615509-118615450	NM_173739	233733	GALNT18	9.00708	8.66696	8.30837	5.69228	5.78485	5.51479
A_55_P2019014	-2.99132	11.464	-16.0481	5.32533e-06	0.00164204	4.99608	ENSMUSG00000054434	Gencode.M18_pc	Tmem120b	transmembrane protein 120B [Source:MGI Symbol;Acc:MGI:3603158]	protein_coding	CTCTTCTGTAAGCCTCCCACAGCCCCACCTTCTGCGGTGGACAAATATTTAAGTTCTCAG	Tmem120b	transmembrane protein 120B	chr5:123567274-123567333	NM_001039723	330189	TMEM120B	13.0942	13.2288	12.5559	10.0037	10.0264	9.87486
A_55_P2156937	-2.9874	8.34569	-14.8748	8.17201e-06	0.00185331	4.58037	ENSMUSG00000041831	Gencode.M18_pc	Sytl3	synaptotagmin-like 3 [Source:MGI Symbol;Acc:MGI:1933367]	protein_coding	TTCGGTGGAAGGGGGCGAAGAGCTCTAGCCAGGAATACAAGGAAAAGTGCTGTGCACGTT	Sytl3	synaptotagmin-like 3	chr17:6880588-6880647	NM_031395	83672	SYTL3	10.2273	9.70217	9.58871	6.96253	6.97669	6.61674
A_55_P1966644	-2.9816	11.0733	-6.77558	0.000599911	0.0156461	0.0239155	ENSMUSG00000031997	Gencode.M18_pc	Trpc6	transient receptor potential cation channel, subfamily C, member 6 [Source:MGI Symbol;Acc:MGI:109523]	protein_coding	AGAGTCCTAATATCAACTTTTTGGGTGATTAAATTGCATTGCTGAGGCTAACAATTGCTG	Trpc6	transient receptor potential cation channel, subfamily C, member 6	chr9:8680682-8680741	NM_013838	22068	TRPC6	12.5175	13.3111	11.8635	9.18826	9.35795	10.2012
A_55_P2011678	-2.97833	12.0008	-10.3138	6.29101e-05	0.0050644	2.48203	ENSMUSG00000028716	Gencode.M18_pc	Pdzk1ip1	PDZK1 interacting protein 1 [Source:MGI Symbol;Acc:MGI:1914432]	protein_coding	TCCTGCAACTATGGAAGTGGCTCTTATTTCTGTGAAATAAAGACTTTTTATACTTCTGGG	Pdzk1ip1	PDZK1 interacting protein 1	chr4:114766409-114766468	NM_001164557	67182	PDZK1IP1	13.302	13.9921	13.176	10.2515	10.3258	10.9576
A_55_P2016842	-2.978	9.80742	-8.55645	0.000174105	0.00832075	1.38428	ENSMUSG00000032418	Gencode.M18_pc	Me1	malic enzyme 1, NADP(+)-dependent, cytosolic [Source:MGI Symbol;Acc:MGI:97043]	protein_coding	AGGCCGGCTCTATCCTCCTTTGAATACCATTCGAGGCGTTTCGTTGAAAATTGCAGTAAA	Me1	malic enzyme 1, NADP(+)-dependent, cytosolic	chr9:86480630-86480571	NM_001198933	17436	ME1	10.986	11.9684	10.9348	8.14231	8.02701	8.78593
A_51_P451458	-2.9747	7.42321	-12.5933	2.07923e-05	0.00306057	3.64134	ENSMUSG00000033207	Gencode.M18_pc	Mamdc2	MAM domain containing 2 [Source:MGI Symbol;Acc:MGI:1918988]	protein_coding	ATGCAGTGTTTTATGGTAACAATTATTCTGGAAATAAGGTCGCCCCATGGAGCCCCAGGA	Mamdc2	MAM domain containing 2	chr19:23377648-23377589	NM_174857	71738	MAMDC2	8.47079	9.33455	8.92634	5.7379	5.94367	6.126
A_55_P2010066	-2.96519	10.7524	-5.9921	0.00112718	0.0214798	-0.675996	ENSMUSG00000079110	Gencode.M18_pc	Capn3	calpain 3 [Source:MGI Symbol;Acc:MGI:107437]	protein_coding	TTCTGAAACTGTCTACTTAGCTTGTACTGGGTTGTCCATAGCACCTGTAGATGGCTCTCA	Capn3	calpain 3	chr2:120330438-120330497	NM_007601	12335	CAPN3	12.1413	12.9994	11.5644	8.6476	9.10208	10.0599
A_51_P305628	-2.96421	7.75169	-7.47803	0.000357598	0.0119868	0.595415	ENSMUSG00000021983	Gencode.M18_pc	Atp8a2	ATPase, aminophospholipid transporter-like, class I, type 8A, member 2 [Source:MGI Symbol;Acc:MGI:1354710]	protein_coding	AGGAAGAAATAAGACGCAAAGTTTCCTGATGGCTCCAAGGAAAGAGATTCAGTTTGTTGC	Atp8a2	ATPase, aminophospholipid transporter-like, class I, type 8A, member 2	chr14:60266675-60266616	NM_015803	50769	ATP8A2	9.1286	10.0593	8.51344	6.44163	5.99886	6.36825
A_51_P408649	-2.95586	7.07272	-4.76857	0.00345887	0.0400627	-1.92326	ENSMUSG00000044461	Gencode.M18_pc	Shisa2	shisa family member 2 [Source:MGI Symbol;Acc:MGI:2444716]	protein_coding	TCTCATGATGACAGCGATAATGTTACATTATCAATGGCAATTGGTACCAACAGATAAGAA	Shisa2	shisa family member 2	chr14:60250369-60250428	NM_145463	219134	SHISA2	8.13449	9.9375	7.57995	5.80889	5.78639	5.18906
A_51_P400016	-2.94991	11.0945	-8.1832	0.000221289	0.00928903	1.1224	ENSMUSG00000061751	Gencode.M18_pc	Kalrn	kalirin, RhoGEF kinase [Source:MGI Symbol;Acc:MGI:2685385]	protein_coding	ATTTAAAGAAACCCTTGTGGATGAAGTCAGGTTGTGCAATATGGGGAGCCGCAATGTTTA	Kalrn	kalirin, RhoGEF kinase	chr16:34013363-34013304	XM_011245966	545156	KALRN	12.5685	13.0081	12.1317	9.28126	9.27213	10.3052
A_55_P2128695	-2.94866	11.016	-11.1395	4.11256e-05	0.00411552	2.93214	ENSMUSG00000027002	Gencode.M18_pc	Nckap1	NCK-associated protein 1 [Source:MGI Symbol;Acc:MGI:1355333]	protein_coding	GTGTTGCTGAGAAATGCATACCATGCTGTCTACAAACAAAGTGTTACATCTTCTGCATAG	Nckap1	NCK-associated protein 1	chr2:80341511-80341452	NM_001290745	50884	NCKAP1	12.4409	13.0248	12.0052	9.46075	9.44274	9.72142
A_51_P114462	-2.94629	9.69696	-5.83633	0.00128743	0.0230604	-0.823804	ENSMUSG00000031780	Gencode.M18_pc	Ccl17	chemokine (C-C motif) ligand 17 [Source:MGI Symbol;Acc:MGI:1329039]	protein_coding	TTTGGAGACGCCAGGGCTGCTGTCCATGGTTTCAACATAAAGCGGCCTGTGACCAGCAGA	Ccl17	chemokine (C-C motif) ligand 17	chr8:97335770-97335829	NM_011332	20295	CCL17	10.9148	10.3873	12.2082	8.63646	7.73713	8.29785
A_55_P1967514	-2.94495	6.76849	-7.89189	0.000268618	0.0102086	0.910006	ENSMUSG00000041144	Gencode.M18_pc	Dnah7b	dynein, axonemal, heavy chain 7B [Source:MGI Symbol;Acc:MGI:2684953]	protein_coding	CTTCTTGCGTTTGACTATGAAGTGATGGATGACAAGGAATATAAAAATGCTCCAGAGGAT	Dnah7c	dynein, axonemal, heavy chain 7C	chr1:46850378-46850437	NM_001310335	100101919	DNAH7B	8.10053	7.65636	8.966	4.95329	5.69798	5.23677
A_51_P393426	-2.94289	11.5338	-6.20089	0.000947075	0.0196274	-0.482539	ENSMUSG00000022912	Gencode.M18_pc	Pros1	protein S (alpha) [Source:MGI Symbol;Acc:MGI:1095733]	protein_coding	ATCAGAGACATCAGGTTATGCTGTAAGAGGTGTGAACATTGGGTGGACAGATCACTCAAC	Pros1	protein S (alpha)	chr16:62928674-62928733	NM_011173	19128	PROS1	12.4647	13.8763	12.6746	9.41374	10.1403	10.6329
A_55_P2142789	-2.94116	8.28588	-7.05047	0.000487501	0.0139444	0.25347	ENSMUSG00000114828	Gencode M18	AI463229	expressed sequence AI463229 [Source:MGI Symbol;Acc:MGI:2145255]	lincRNA	CCGAGAGGAACTGGTGAGTGCTTATGGAGCAAAGAGCATGTAGAACCTTCTAGTCTCTGA	AI463229	expressed sequence AI463229	chr13:37750629-37750570	XR_382207	100042802	AI463229	9.37694	10.5917	9.30073	6.29978	6.96789	7.17821
A_51_P344376	-2.93948	8.44745	-14.466	9.55958e-06	0.00203709	4.42563	ENSMUSG00000038390	Gencode.M18_pc	Gpr162	G protein-coupled receptor 162 [Source:MGI Symbol;Acc:MGI:1315214]	protein_coding	CCATCCAAGTGACCAGATACCCAACGCACCCGTCTTCACCCCTAGCAAAATGTATTAAAA	Gpr162	G protein-coupled receptor 162	chr6:124808540-124808481	NM_013533	14788	GPR162	10.2759	9.56412	9.91158	6.91993	6.82615	7.18706
A_55_P2160094	-2.9371	7.65953	-11.1688	4.05323e-05	0.00406737	2.94742	ENSMUSG00000032372	Gencode.M18_pc	Plscr2	phospholipid scramblase 2 [Source:MGI Symbol;Acc:MGI:1270860]	protein_coding	TTTGAAAGCTTTTTAAAAGATACTATTGCCTGGGAAATTCTATTCAATAAAATGCTAATG	Plscr2	phospholipid scramblase 2	chr9:92192504-92192563	NM_001195084	18828	PLSCR2	8.79711	9.72969	8.85746	6.09518	6.1854	6.29238
A_51_P183912	-2.92573	8.80398	-25.8408	3.54549e-07	0.00042813	7.33074	ENSMUSG00000005465	Gencode.M18_pc	Il27ra	interleukin 27 receptor, alpha [Source:MGI Symbol;Acc:MGI:1355318]	protein_coding	GGCCTTCTAGTCTGATCTGCTTACGGCTAGGGGCTGTACCCCTATCTTGGGCTAGACGTT	Il27ra	interleukin 27 receptor, alpha	chr8:86554944-86554885	NM_016671	50931	IL27RA	10.263	10.4179	10.1196	7.47832	7.22358	7.32144
A_55_P2046812	-2.92502	7.54484	-10.117	6.99346e-05	0.00528996	2.3691	ENSMUSG00000018593	Gencode.M18_pc	Sparc	secreted acidic cysteine rich glycoprotein [Source:MGI Symbol;Acc:MGI:98373]	protein_coding	GGCTGTTCCGCCTGGGGATAAGGTGCTAACATAGATTTAACTGAATACATTAACGGTGCT	Sparc	secreted acidic cysteine rich glycoprotein	chr11:55208998-55208939	NM_009242	20692	SPARC	8.47971	9.62216	8.92019	6.06301	5.98166	6.20233
A_52_P494020	-2.92085	9.09904	-10.8131	4.84781e-05	0.00452533	2.75865	ENSMUSG00000074805	Gencode M18	Il1bos	interleukin 1 beta, opposite strand [Source:MGI Symbol;Acc:MGI:3650458]	antisense	CATCTTGGGGATAAATGAGAAAAGAAAGGTTCTAATTAAAAAGTGATAAGTTGGGCCTTG	Il1bos	interleukin 1 beta, opposite strand	chr2:129201243-129201302	NR_015474	329514	IL1BOS	10.3429	10.7981	10.5374	7.07151	7.85008	7.99427
A_55_P2056344	-2.91868	10.1498	-4.50281	0.00452644	0.0469112	-2.22202	ENSMUSG00000116672	Gencode.M18_pc	AC117241.1	novel protein, RP24-147H15.5-Ttll2 readthrough	protein_coding	TTCTTCGTCCTCTCTGGCCTGTGGGGAATGTCTGATGCTGTCTGGCAGACACAGAACAAT	Gm9992	predicted gene 9992	chr17:7574086-7574027	NM_001142539	667055	AC117241.1	10.6119	11.201	13.0144	8.53283	8.30931	9.22918
A_55_P2097553	-2.9148	12.9461	-7.99549	0.000250554	0.0098981	0.986365	ENSMUSG00000050390	Gencode.M18_pc	C77080	expressed sequence C77080 [Source:MGI Symbol;Acc:MGI:2140651]	protein_coding	CCTCTGAAGCTTGAGTGAGACACATGACAAAGCTGTGTTTCATTAAAAGGTATTAATTAA	C77080	expressed sequence C77080	chr4:128896895-128896836	NM_001033189	97130	C77080	14.1906	15.103	13.9167	11.0145	11.7803	11.6712
A_51_P489522	-2.90659	15.6171	-9.90442	7.85763e-05	0.00552447	2.24444	ENSMUSG00000074874	Gencode.M18_pc	Ctla2b	cytotoxic T lymphocyte-associated protein 2 beta [Source:MGI Symbol;Acc:MGI:88555]	protein_coding	CTCAATGTGTAGAGGAGAAATGGCTCCTGATTTGCCTGAATATGAAGATTTGGGAAAGAA	Ctla2b	cytotoxic T lymphocyte-associated protein 2 beta	chr13:60997469-60997410	NM_007797	13025	CTLA2B	17.0185	17.2578	16.9349	13.5827	14.1823	14.7264
A_55_P2016049	-2.90549	11.9561	-5.43266	0.00184018	0.027869	-1.22123	ENSMUSG00000078810	Gencode.M18_pc	Gp6	glycoprotein 6 (platelet) [Source:MGI Symbol;Acc:MGI:1889810]	protein_coding	ACATCACCACTAGAGCCACAGACATGGACATACTCAAGAGTGGGGAGGTTATATAAAAAA	Gp6	glycoprotein 6 (platelet)	chr7:4320410-4320351	NM_001163014	243816	GP6	13.1744	14.2265	12.8256	9.90479	10.1558	11.4494
A_55_P2171413	-2.90197	9.61672	-7.30778	0.000403831	0.0127432	0.461387	ENSMUSG00000032418	Gencode.M18_pc	Me1	malic enzyme 1, NADP(+)-dependent, cytosolic [Source:MGI Symbol;Acc:MGI:97043]	protein_coding	TTCTGTGTATCTAGAGACTCCTGACTTTGAAGTTGCTTTAAAGCCTGTGTGGGTTTGCGG	Me1	malic enzyme 1, NADP(+)-dependent, cytosolic	chr9:86475274-86475215	NM_001198933	17436	ME1	10.6736	11.9166	10.6129	8.09472	7.85582	8.54668
A_55_P1970090	-2.89643	6.22605	-10.7649	4.9688e-05	0.00456852	2.73257	ENSMUSG00000020734	Gencode.M18_pc	Grin2c	glutamate receptor, ionotropic, NMDA2C (epsilon 3) [Source:MGI Symbol;Acc:MGI:95822]	protein_coding	ATTGGTTGGAATTTCTTTTCATAGGAACATTGGGACATTAAAGCAACGTTTTACAACCCA	Grin2c	glutamate receptor, ionotropic, NMDA2C (epsilon 3)	chr11:115110542-115110483	NM_010350	14813	GRIN2C	7.25537	7.48766	8.27976	4.70541	4.75323	4.87486
A_52_P253044	-2.89009	10.7921	-6.27289	0.000892826	0.0191115	-0.417028	ENSMUSG00000027220	Gencode.M18_pc	Syt13	synaptotagmin XIII [Source:MGI Symbol;Acc:MGI:1933945]	protein_coding	ACATGTCTGGTTACACTTTGGAGCACAAAATCTTACAGTGGTAAATAAATCGTTTTCCAA	Syt13	synaptotagmin XIII	chr2:92795818-92795877	NM_030725	80976	SYT13	11.8466	12.8733	11.9915	8.50072	9.53714	10.0032
A_51_P279062	-2.88399	13.8206	-6.32517	0.000855676	0.018713	-0.369842	ENSMUSG00000023993	Gencode.M18_pc	Treml1	triggering receptor expressed on myeloid cells-like 1 [Source:MGI Symbol;Acc:MGI:1918576]	protein_coding	TATCTTGGTTTGGTGCAGTCAGGGAGTGGTGCTCCGATATGATTGGGGTGTTTGGGGAAA	Treml1	triggering receptor expressed on myeloid cells-like 1	chr17:48506365-48506424	NM_027763	71326	TREML1	15.3372	15.7889	14.6618	11.6897	12.2719	13.1743
A_52_P77080	-2.87655	8.30613	-5.98498	0.00113398	0.0215868	-0.682687	ENSMUSG00000051839	Gencode.M18_pc	Gypa	glycophorin A [Source:MGI Symbol;Acc:MGI:95880]	protein_coding	TCTTGAATAATTCAAAATAATTTGACAATGGCACATTGACTCCTTCAGAGTATGGACCAG	Gypa	glycophorin A	chr8:83033967-83034026	NM_010369	14934	GYPA	9.81429	8.84406	10.5749	6.38342	6.88079	7.33934
A_51_P265806	-2.87085	9.81519	-6.42904	0.000787027	0.0179695	-0.277024	ENSMUSG00000056025	Gencode.M18_pc	Clca3a1	chloride channel accessory 3A1 [Source:MGI Symbol;Acc:MGI:1316732]	protein_coding	AACATTGCACAGGCTGTCAAGTTTACTTCTCTAGAAGATAGTATCTCTGCACTGGGTGCT	Clca3a2	chloride channel accessory 3A2	chr3:144460568-144460509	NM_030601	80797	CLCA3A1	10.8459	12.0115	10.8945	7.98307	8.03786	9.11839
A_55_P1962966	-2.86114	11.8366	-11.8649	2.89793e-05	0.00344198	3.29829	ENSMUSG00000027002	Gencode.M18_pc	Nckap1	NCK-associated protein 1 [Source:MGI Symbol;Acc:MGI:1355333]	protein_coding	GATGGTAGTCCCGAATCACTTTTTATATGTTTTAACATTTGAAATTCAAGTGTACCTGCC	Nckap1	NCK-associated protein 1	chr2:80340766-80340707	NM_001290745	50884	NCKAP1	13.1924	13.7398	12.8694	10.2081	10.3974	10.6127
A_51_P155458	-2.8605	11.0959	-7.26409	0.000416786	0.0129074	0.426548	ENSMUSG00000044716	Gencode.M18_pc	Dok7	docking protein 7 [Source:MGI Symbol;Acc:MGI:3584043]	protein_coding	CTTACCTGTAAATGCCTCGGTCTGTACCTGCATTGCGGCCAACCATGTTGCTCTATTGCG	Dok7	docking protein 7	chr5:35423495-35423554	NM_001348274	231134	DOK7	12.4676	11.8504	13.2605	9.2202	9.81973	9.95702
A_55_P2085200	-2.85705	7.22507	-12.4608	2.20563e-05	0.0031187	3.58068	ENSMUSG00000061039	Gencode.M18_pc	Olfr920	olfactory receptor 920 [Source:MGI Symbol;Acc:MGI:3030754]	protein_coding	GCATTTATGTATCTTAAACCCAACTCAACTGGAACAATGAACAATGGAAAGATACCTTCA	Olfr920	olfactory receptor 920	chr9:38564040-38564099	NM_146787	258783	OLFR920	8.79076	8.95458	8.21544	5.56598	6.05292	5.77074
A_51_P149562	-2.85637	10.2446	-9.76245	8.50416e-05	0.0057369	2.15963	ENSMUSG00000029207	Gencode.M18_pc	Apbb2	amyloid beta (A4) precursor protein-binding, family B, member 2 [Source:MGI Symbol;Acc:MGI:108405]	protein_coding	CACTGAATTGCTGTAACAATGGGGTGACACCTTTGGGTTTTAGTTTTTCATAACACTGAG	Apbb2	amyloid beta (A4) precursor protein-binding, family B, member 2	chr5:66693348-66693289	NM_009686	11787	APBB2	11.5312	11.983	11.5042	8.35358	8.70125	9.39449
A_55_P2064741	-2.85205	12.3269	-17.3621	3.41188e-06	0.0014372	5.41676	ENSMUSG00000025723	Gencode.M18_pc	Nmb	neuromedin B [Source:MGI Symbol;Acc:MGI:1915289]	protein_coding	TCTTTCCTGCTGTATTTCTTGCTTCCCTGGTGAAGTGGTGAATAAAAATACTGCTCTTTA	Nmb	neuromedin B	chr7:88047179-88047120	NM_026523	68039	NMB	14.0119	13.4474	13.7994	10.8609	10.7886	11.053
A_55_P2047305	-2.84686	8.16978	-5.10806	0.00248745	0.0332582	-1.55661	ENSMUSG00000022840	Gencode.M18_pc	Adcy5	adenylate cyclase 5 [Source:MGI Symbol;Acc:MGI:99673]	protein_coding	GCAAGAGGACACCAGGCAAGGAGCAGTGGCTCTGAGCAAAAGAAAATATTTATTAAATAA	Adcy5	adenylate cyclase 5	chr16:35304398-35304457	NM_001012765	224129	ADCY5	9.41907	10.6795	8.68108	6.32321	6.54614	7.36971
A_51_P439996	-2.84619	12.235	-5.79648	0.00133253	0.0234445	-0.862096	ENSMUSG00000047953	Gencode.M18_pc	Gp5	glycoprotein 5 (platelet) [Source:MGI Symbol;Acc:MGI:1096363]	protein_coding	GTGAAAGTCCCAATAACAGGCTCTACTGGGGTCTTTATATTCTGCTTCTAGTAGCCCAGG	Gp5	glycoprotein 5 (platelet)	chr16:30308406-30308347	NM_008148	14729	GP5	13.848	14.3006	12.8256	10.3059	10.5532	11.5766
A_55_P2009952	-2.84462	10.8415	-7.23701	0.00042506	0.0130043	0.404856	ENSMUSG00000032418	Gencode.M18_pc	Me1	malic enzyme 1, NADP(+)-dependent, cytosolic [Source:MGI Symbol;Acc:MGI:97043]	protein_coding	CCTAATGACAACTTGTGACTAACGGTTTCTTCAGTGTAGTTATTTGAGAAAGATTCAGAA	Me1	malic enzyme 1, NADP(+)-dependent, cytosolic	chr9:86475136-86475077	NM_001198933	17436	ME1	11.885	13.1267	11.7798	9.21353	9.28155	9.76253
A_51_P214187	-2.84218	7.37844	-6.23028	0.000924481	0.0194009	-0.455719	ENSMUSG00000021609	Gencode.M18_pc	Slc6a3	solute carrier family 6 (neurotransmitter transporter, dopamine), member 3 [Source:MGI Symbol;Acc:MGI:94862]	protein_coding	TGGCTGAGAAGAATCAGGTTTACCATCTCCTCTCAGAGCTGAGTGGCTCCATGTATAAAT	Slc6a3	solute carrier family 6 (neurotransmitter transporter, dopamine), member 3	chr13:73715973-73716032	NM_010020	13162	SLC6A3	8.34022	9.83418	8.22419	5.72529	5.8846	6.26216
A_66_P105791	-2.8384	12.1475	-6.76032	0.000606984	0.0157399	0.0109366	ENSMUSG00000050965	Gencode.M18_pc	Prkca	protein kinase C, alpha [Source:MGI Symbol;Acc:MGI:97595]	protein_coding	TCCGTTTGCATGATCCGCTCTGTTAGATGCATTCATTGTAGTTCGGAAGCAAGCGTGTAT	Prkca	protein kinase C, alpha	chr11:107794785-107794726	NM_011101	18750	PRKCA	13.5625	14.2095	12.9281	10.4358	10.3548	11.3943
A_51_P146044	-2.83501	8.61729	-5.06792	0.00258428	0.0340983	-1.5991	ENSMUSG00000037979	Gencode.M18_pc	Ccdc92	coiled-coil domain containing 92 [Source:MGI Symbol;Acc:MGI:106485]	protein_coding	AGAATGAATGCACTTGCCTTAAAACTCGCTCTGGCGTGTGCTCTATCCAGAGTTCTCTAT	Ccdc92	coiled-coil domain containing 92	chr5:125314998-125314939	NM_144819	215707	CCDC92	10.4797	10.7043	8.92041	6.9335	6.75168	7.91416
A_66_P129622	-2.82906	12.6921	-16.0357	5.34872e-06	0.00164204	4.99188	ENSMUSG00000074277	Gencode.M18_pc	Phldb3	pleckstrin homology like domain, family B, member 3 [Source:MGI Symbol;Acc:MGI:3642959]	protein_coding	GGTGGAAGGAACTATTTATTGGTGCTCCTCTGATATCGAATTAAACATGGTGAAAAAACA	Phldb3	pleckstrin homology like domain, family B, member 3	chr7:25414256-25414315	NM_001102613	232970	PHLDB3	14.2405	14.3127	13.7667	11.4718	11.141	11.2199
A_52_P553890	-2.82178	14.8662	-10.2802	6.40469e-05	0.00508808	2.46295	ENSMUSG00000020689	Gencode.M18_pc	Itgb3	integrin beta 3 [Source:MGI Symbol;Acc:MGI:96612]	protein_coding	CCACAGCAACATCAGAGTCTTTGTCCATTTTTGGTTGAAATTGCTTACGCGCCTTCCTGA	Itgb3	integrin beta 3	chr11:104531672-104531731	NM_016780	16416	ITGB3	16.3189	16.5832	15.9293	12.9979	13.4749	13.8931
A_55_P2069485	-2.81997	8.66782	-5.32798	0.00202514	0.0295697	-1.32781	ENSMUSG00000034573	Agilent eArray	Ptpn13	protein tyrosine phosphatase, non-receptor type 13	protein_coding	CCAGATACCGTTTGTACCTGTGTCATCTCACTTTGTAAATAAAACTACACCTTAAAACAT	Ptpn13	protein tyrosine phosphatase, non-receptor type 13	chr5:104027311-104027370	NM_011204	19249	PTPN13	9.22108	11.2096	9.80275	7.06258	7.00983	7.70111
A_51_P518051	-2.81623	9.21845	-13.3807	1.48109e-05	0.0025625	3.98713	ENSMUSG00000031530	Gencode.M18_pc	Dusp4	dual specificity phosphatase 4 [Source:MGI Symbol;Acc:MGI:2442191]	protein_coding	AATAACGGCGGTTTCCGCTGCCAGAGAAGACTTGGTTTCTGTGTCAGTTTTTACTTTGCA	Dusp4	dual specificity phosphatase 4	chr8:35882045-35882104	NM_176933	319520	DUSP4	10.9549	10.3625	10.5623	8.12437	7.75308	7.55356
A_55_P2008599	-2.81606	8.6923	-9.83515	8.16563e-05	0.00561306	2.20322	ENSMUSG00000024892	Gencode.M18_pc	Pcx	pyruvate carboxylase [Source:MGI Symbol;Acc:MGI:97520]	protein_coding	AGAGGGAAGACCTAATTCACAGGTCCTGGGAAATTTGCTCAATAAAAGTGGCCTTCCCTT	Pcx	pyruvate carboxylase	chr19:4621610-4621669	NM_001162946	18563	PCX	10.5291	10.3001	9.47179	7.13387	7.46496	7.25399
A_55_P2159746	-2.80498	10.3779	-7.29944	0.000406268	0.0127645	0.45475	ENSMUSG00000037336	Gencode.M18_pc	Mfsd2b	major facilitator superfamily domain containing 2B [Source:MGI Symbol;Acc:MGI:3583946]	protein_coding	TACATTCCTTTTGCTAAATGGCAGAGTTCCAACACAGGAATTCAGACACAGGCCTGGCTT	Mfsd2b	major facilitator superfamily domain containing 2B	chr12:4870663-4870604	NM_001033488	432628	MFSD2B	11.9624	12.254	11.1246	8.5941	8.75559	9.57638
A_55_P2052696	-2.79805	8.88124	-5.53087	0.00168407	0.0263986	-1.12258	ENSMUSG00000030554	Gencode.M18_pc	Synm	synemin, intermediate filament protein [Source:MGI Symbol;Acc:MGI:2661187]	protein_coding	GTAAGCTAACACTGGAAAGGAAAATAGGTGCGTTTTTCTCTTTCCTACATCTTAAAAACA	Synm	synemin, intermediate filament protein	chr7:74877688-74877629	NM_201639	233335	SYNM	9.97847	11.2892	9.57312	6.99114	7.40621	8.0493
A_55_P2037677	-2.79754	13.0408	-9.14285	0.000121605	0.00684045	1.77408	ENSMUSG00000031078	Gencode.M18_pc	Cttn	cortactin [Source:MGI Symbol;Acc:MGI:99695]	protein_coding	GGGTTTTCTATATGAATTATCATCTGGAATTCTGTAGCACACCTCATAGGTATGGAATTT	Cttn	cortactin	chr7:151621737-151621678	NM_007803	13043	CTTN	14.5406	14.6351	14.1431	11.2431	11.394	12.2891
A_55_P1961436	-2.79171	12.0522	-7.66293	0.000314181	0.0111369	0.737882	ENSMUSG00000050965	Gencode.M18_pc	Prkca	protein kinase C, alpha [Source:MGI Symbol;Acc:MGI:97595]	protein_coding	CTTGCTAGAAGGATTTTAATATGTTTTGCGAGTGCATCATGCAATGGATTTTGCATGTTT	Prkca	protein kinase C, alpha	chr11:107799646-107799587	NM_011101	18750	PRKCA	13.4923	14.0547	12.797	10.5696	10.3071	11.0922
A_55_P1992049	-2.78912	10.4009	-4.597	0.00411018	0.0442835	-2.11493	ENSMUSG00000033910	Gencode.M18_pc	Gucy1a1	guanylate cyclase 1, soluble, alpha 1 [Source:MGI Symbol;Acc:MGI:1926562]	protein_coding	GGAACTTTATCTAATTCAAGTCAAAAGAAGTATAGAAGCTCCATGTACGGTTCCTATAAC	Gucy1a3	guanylate cyclase 1, soluble, alpha 3	chr3:81896468-81896409	NM_021896	60596	GUCY1A1	11.6644	12.8962	10.8257	8.52493	8.68583	9.8082
A_55_P2176015	-2.7869	12.4539	-5.03104	0.00267706	0.034693	-1.63834	ENSMUSG00000024680	Gencode.M18_pc	Ms4a2	membrane-spanning 4-domains, subfamily A, member 2 [Source:MGI Symbol;Acc:MGI:95495]	protein_coding	GTTTTGTGTCACAATTTCACATACATCTTTTCTGGAAAGTCATCAAGGAATAAGTTGGCT	Ms4a2	membrane-spanning 4-domains, subfamily A, member 2	chr19:11691760-11691701	NM_013516	14126	MS4A2	13.5869	14.7324	13.2228	11.8997	10.241	11.0407
A_55_P2010121	-2.78204	12.0767	-6.7664	0.000604154	0.0157002	0.0161116	ENSMUSG00000024511	Gencode.M18_pc	Rab27b	RAB27B, member RAS oncogene family [Source:MGI Symbol;Acc:MGI:1931295]	protein_coding	GTGTAATGTTGTTGACACCTGTATTTAATGACACCTGCACACCTTTCAAATAAAAACATG	Rab27b	RAB27B, member RAS oncogene family	chr18:70138858-70138799	NM_001082553	80718	RAB27B	13.4856	14.1325	12.7852	10.3507	10.4345	11.272
A_55_P2126269	-2.78008	12.1924	-18.4364	2.42746e-06	0.00123855	5.72976	ENSMUSG00000025723	Gencode.M18_pc	Nmb	neuromedin B [Source:MGI Symbol;Acc:MGI:1915289]	protein_coding	ACACAAAGTCTTTCCTGCTGTATTTCTTGCTTCCCTGGTGAAGTGGTGAATAAAAATACT	Nmb	neuromedin B	chr7:88047187-88047128	NM_026523	68039	NMB	13.799	13.3008	13.6476	10.8172	10.6676	10.9224
A_55_P2092993	-2.76815	10.9591	-7.08755	0.000474283	0.0137784	0.283847	ENSMUSG00000042498	Gencode.M18_pc	D330045A20Rik	RIKEN cDNA D330045A20 gene [Source:MGI Symbol;Acc:MGI:2147848]	protein_coding	GTGAGCAGCCTAAGAACTTAAAGGTGTACGGTATTTTGTTTATAAAGATGTTCAGATTTC	D330045A20Rik	RIKEN cDNA D330045A20 gene	chrX:136088978-136089037	NM_175326	102871	D330045A20RIK	12.3384	13.1091	11.582	9.82558	9.33969	9.55976
A_55_P1954277	-2.76398	8.19279	-4.4933	0.00457107	0.0471257	-2.23291	ENSMUSG00000034164	Gencode.M18_pc	Emid1	EMI domain containing 1 [Source:MGI Symbol;Acc:MGI:2155091]	protein_coding	AAGTGTCTGCTGCAGATGCCACGAGTCAATATGTACAGGACAATAAACATCCCTGCTTGA	Emid1	EMI domain containing 1	chr11:5006332-5006273	NM_080595	140703	EMID1	10.4869	10.0097	8.22766	6.70932	6.4233	7.29977
A_55_P1987730	-2.762	13.7579	-12.013	2.70458e-05	0.00335512	3.36999	ENSMUSG00000021792	Gencode.M18_pc	Fam213a	family with sequence similarity 213, member A [Source:MGI Symbol;Acc:MGI:1917814]	protein_coding	TTGCTTCCTTGGGAAAAACTGTCACCTGGGAAACTGTCACCTCTAATAAAAATATTCACC	Fam213a	family with sequence similarity 213, member A	chr14:41807088-41807029	NM_001316734	70564	FAM213A	14.7891	15.4081	15.2194	12.5486	11.9927	12.5892
A_52_P480351	-2.75886	7.25987	-9.06109	0.000127685	0.00703281	1.72125	ENSMUSG00000034205	Gencode.M18_pc	Loxl2	lysyl oxidase-like 2 [Source:MGI Symbol;Acc:MGI:2137913]	protein_coding	CACCAAAGGCTTCGGGACTCCTGTGTGTAGCTAGTTATTAAGACACTTAAGAACTCTCGT	Loxl2	lysyl oxidase-like 2	chr14:70095254-70095313	NM_033325	94352	LOXL2	9.0375	7.95424	8.92615	6.01193	5.94028	5.6891
A_51_P335460	-2.74897	15.7485	-10.4393	5.88562e-05	0.00495843	2.55293	ENSMUSG00000002565	Gencode.M18_pc	Scin	scinderin [Source:MGI Symbol;Acc:MGI:1306794]	protein_coding	CATCTCAAGTCAATGCCACTTGGATGCCATTCACTCCCAAGTGTCCTTACATAGGATGAA	Scin	scinderin	chr12:40786576-40786517	NM_009132	20259	SCIN	17.245	17.4893	16.6347	14.5331	14.0296	14.5594
A_55_P2005685	-2.74805	10.3922	-7.95307	0.000257774	0.0100518	0.955215	ENSMUSG00000042590	Gencode.M18_pc	Ipo11	importin 11 [Source:MGI Symbol;Acc:MGI:2442377]	protein_coding	AGCTCTGCAGAGTTAAAACAAAGCCTTAAAGCCACGTGATGATACGAGTCCCGTATCCTT	Ipo11	importin 11	chr13:107626352-107626293	XR_382746	76582	IPO11	11.5337	12.2522	11.5128	8.56892	8.82991	9.65575
A_51_P435339	-2.74705	11.6187	-6.26626	0.00089767	0.0191429	-0.423036	ENSMUSG00000006235	Gencode.M18_pc	Epor	erythropoietin receptor [Source:MGI Symbol;Acc:MGI:95408]	protein_coding	GAACGGGATTGGTGAAGCCATACTTAAAGTCAGAGCTGACCTTGGCCCTCTGAGCAGGAA	Epor	erythropoietin receptor	chr9:21763481-21763422	NM_010149	13857	EPOR	13.0786	13.4625	12.4357	10.0057	9.65696	11.073
A_55_P2080021	-2.74574	14.7286	-7.66006	0.000314807	0.0111369	0.735694	ENSMUSG00000024899	Gencode.M18_pc	Papss2	3'-phosphoadenosine 5'-phosphosulfate synthase 2 [Source:MGI Symbol;Acc:MGI:1330223]	protein_coding	ATAACTGTTTCAGTGTCCCGCTGGTACCTGTTCTTATTCAATAAATCTCTCAAAAGACCA	Papss2	3'-phosphoadenosine 5'-phosphosulfate synthase 2	chr19:32741618-32741677	NM_011864	23972	PAPSS2	16.0108	16.8165	15.477	13.6894	13.1987	13.1791
A_52_P228551	-2.74183	8.42838	-9.19863	0.000117649	0.00669215	1.80986	ENSMUSG00000040133	Gencode.M18_pc	Gpr176	G protein-coupled receptor 176 [Source:MGI Symbol;Acc:MGI:2685858]	protein_coding	GATACAGCTTTTACTAAGGGGAAAAAACAATCTGTCAGAATATTGTATGTACCTGAGAAG	Gpr176	G protein-coupled receptor 176	chr2:118103102-118103043	NM_201367	381413	GPR176	9.64872	10.2724	9.4768	6.55493	7.35887	7.25859
A_55_P1962334	-2.74018	6.46276	-6.81439	0.000582354	0.0154033	0.0568038	ENSMUSG00000079259	Gencode.M18_pc	Trim71	tripartite motif-containing 71 [Source:MGI Symbol;Acc:MGI:2685973]	protein_coding	AAAGGATTTACAAACCAAACCACCCAACAGGAAGTGTAGGACACAGTATATGTCTTTTTT	Trim71	tripartite motif-containing 71	chr9:114420474-114420415	NM_001042503	636931	TRIM71	7.08155	7.70885	8.70815	5.02556	5.05249	5.19997
A_55_P1966755	-2.7339	6.45372	-6.51857	0.000732916	0.017176	-0.198005	ENSMUSG00000030670	Gencode.M18_pc	Cyp2r1	cytochrome P450, family 2, subfamily r, polypeptide 1 [Source:MGI Symbol;Acc:MGI:2449771]	protein_coding	AATGGTGTTTGGGCCAAAGCCACATTTTTATAAAGCCAAGTAAACACAAATACACTGTTT	Cyp2r1	cytochrome P450, family 2, subfamily r, polypeptide 1	chr7:121693743-121693684	NM_177382	244209	CYP2R1	6.93597	7.88981	8.63624	5.0738	4.96403	5.22249
A_51_P101137	-2.73343	10.3035	-6.019	0.0011019	0.0212138	-0.650779	ENSMUSG00000047181	Gencode.M18_pc	Samd14	sterile alpha motif domain containing 14 [Source:MGI Symbol;Acc:MGI:2384945]	protein_coding	CAGGGCCCTATGTTTGTGCTCAGTCACCTTCACTGGAAGAGGGGGCCTCATAGGGAAAAC	Samd14	sterile alpha motif domain containing 14	chr11:94887191-94887250	NM_146025	217125	SAMD14	11.7695	12.3399	10.9012	8.67202	8.52434	9.61388
A_55_P2095820	-2.72983	9.26027	-8.0692	0.000238557	0.00959167	1.04014	ENSMUSG00000061751	Gencode.M18_pc	Kalrn	kalirin, RhoGEF kinase [Source:MGI Symbol;Acc:MGI:2685385]	protein_coding	AAAGATTACTATGCACTGAAGGAGAATGAAATCTGCGTGAGCCAAGGTGAGGTGGTACAG	Kalrn	kalirin, RhoGEF kinase	chr16:34014252-34014193	NM_177357	545156	KALRN	10.6524	11.1191	10.1041	7.68568	7.56818	8.43221
A_55_P2046509	-2.72789	9.17539	-5.85785	0.0012638	0.0227752	-0.803203	ENSMUSG00000041688	Gencode.M18_pc	Amot	angiomotin [Source:MGI Symbol;Acc:MGI:108440]	protein_coding	CTTAATGTACATGGTCTTGTAGTGATTGTGATCCTATTCTGTAATCAAGAGAGTTAGATC	Amot	angiomotin	chrX:141881095-141881036	NM_153319	27494	AMOT	10.6795	11.2885	9.64997	7.37476	8.33163	7.72796
A_55_P2109326	-2.71949	7.5508	-7.32413	0.000399101	0.01264	0.474383	ENSMUSG00000023328	Gencode.M18_pc	Ache	acetylcholinesterase [Source:MGI Symbol;Acc:MGI:87876]	protein_coding	ACTACACCACGGAGGAGAGGATCTTTGCTCAGCGACTTATGAAATACTGGACCAATTTTG	Ache	acetylcholinesterase	chr5:137733122-137733181	NM_001290010	11423	ACHE	9.27587	9.2934	8.16236	5.85852	6.08157	6.63307
A_52_P208222	-2.70612	8.88504	-7.06847	0.000481034	0.0138852	0.26823	ENSMUSG00000004347	Gencode.M18_pc	Pde1c	phosphodiesterase 1C [Source:MGI Symbol;Acc:MGI:108413]	protein_coding	ATAGCTTGATAACTGGAATCACTTCTTGAGTTGTACCTTCATATCACCCAACAAGTCTAT	Pde1c	phosphodiesterase 1C	chr6:56054231-56054172	NM_001025568	18575	PDE1C	9.9654	10.6662	10.0827	6.8751	8.25026	7.47057
A_51_P214985	-2.70597	7.46227	-5.84231	0.00128081	0.0229924	-0.818069	ENSMUSG00000024420	Gencode.M18_pc	Zfp521	zinc finger protein 521 [Source:MGI Symbol;Acc:MGI:95459]	protein_coding	CCTGAACCTGGAGATTACTGGAATTGTTTTCCAAGAGGAAATAAATTCAGTTTACCATCA	Zfp521	zinc finger protein 521	chr18:13846783-13846724	NM_145492	225207	ZFP521	8.37523	9.77522	8.29533	6.56023	6.13822	5.6294
A_55_P2038540	-2.70095	13.6851	-4.96886	0.00284225	0.0358009	-1.70495	NA	Agilent eArray	Hbb-b2	hemoglobin, beta adult minor chain	NA	TATCATGGGTAATCCCAAGGTGAAGGCCCATGGCAAAAAGGTGATAACTGCCTTTAACGA	Hbb-b2	hemoglobin, beta adult minor chain	NA	NM_016956	15130	HBB-B2	14.2816	14.8135	16.0116	11.8356	12.0477	13.1204
A_66_P131645	-2.70043	9.4989	-12.0278	2.68622e-05	0.00334403	3.37705	ENSMUSG00000072812	Gencode.M18_pc	Ahnak2	AHNAK nucleoprotein 2 [Source:MGI Symbol;Acc:MGI:2144831]	protein_coding	AGATTCTCCTGGCCAAAATTTCAAACCTTAAGGAGCAAGCAGAGGGCAGGCCCCCGACGC	NA	NA	chr12:114023689-114023630	XM_017315330	NA	AHNAK2	10.7263	11.1936	10.6275	7.77157	8.39215	8.28232
A_55_P2000127	-2.69937	7.44442	-6.67222	0.00064974	0.0162777	-0.0644696	ENSMUSG00000030782	Gencode.M18_pc	Tgfb1i1	transforming growth factor beta 1 induced transcript 1 [Source:MGI Symbol;Acc:MGI:102784]	protein_coding	ATGTAGCTCTCACTTTGACATGATTCTGGTTCTCTTGTCTGACCAAGTAGAGGCCAGGAT	Tgfb1i1	transforming growth factor beta 1 induced transcript 1	chr7:135397091-135397150	NM_001289550	21804	TGFB1I1	8.98857	9.15485	8.2389	5.51092	5.94323	6.83006
A_55_P1955188	-2.69399	7.83923	-29.9669	1.51903e-07	0.000327488	7.93119	ENSMUSG00000045004	Gencode.M18_pc	Spata21	spermatogenesis associated 21 [Source:MGI Symbol;Acc:MGI:3607787]	protein_coding	CAGGGCCTGGATTTGGGAGTTTGCTTTCATGGTCTGGTAAGCCAATAAACACCAAGAACC	Spata21	spermatogenesis associated 21	chr4:140668613-140668672	NM_177867	329972	SPATA21	9.29699	9.06981	9.19186	6.53985	6.40769	6.52915
A_55_P2027737	-2.6912	16.0401	-13.3498	1.5004e-05	0.0025625	3.97402	ENSMUSG00000026069	Gencode.M18_pc	Il1rl1	interleukin 1 receptor-like 1 [Source:MGI Symbol;Acc:MGI:98427]	protein_coding	GCCATTGACTCCTTGTGTGTTTTCTTCATGTGTGTTTGAAGAGTTCTAGCTTATTAAAAA	Il1rl1	interleukin 1 receptor-like 1	chr1:40522187-40522246	NM_001025602	17082	IL1RL1	17.4836	17.6483	17.0253	14.9363	14.4694	14.6778
A_55_P1986596	-2.69082	9.0372	-7.12428	0.000461603	0.0135621	0.313787	ENSMUSG00000024112	Gencode.M18_pc	Cacna1h	calcium channel, voltage-dependent, T type, alpha 1H subunit [Source:MGI Symbol;Acc:MGI:1928842]	protein_coding	CAAAGCTAAGGGGAGGGGAGGGGCAAAGCAAAGCTGAATAAACACTAACTTATTTAAGAA	Cacna1h	calcium channel, voltage-dependent, T type, alpha 1H subunit	chr17:25511294-25511235	NM_021415	58226	CACNA1H	9.5666	11.1034	10.4778	7.64882	7.74377	7.68279
A_51_P406466	-2.68339	7.90783	-6.71626	0.000627944	0.0159522	-0.0266657	ENSMUSG00000038354	Gencode.M18_pc	Ankrd35	ankyrin repeat domain 35 [Source:MGI Symbol;Acc:MGI:2442590]	protein_coding	GCAGGAGTGAGGCAGGCTCACTGTGTGCCCTCAGGGATAAAGGCATTTCTCTTTTGTGAG	Ankrd35	ankyrin repeat domain 35	chr3:96494165-96494224	NM_001081139	213121	ANKRD35	9.22446	10.0161	8.50805	6.43911	6.32671	6.9326
A_52_P499028	-2.68235	10.2824	-12.0043	2.71561e-05	0.00335512	3.36577	ENSMUSG00000054951	Gencode.M18_pc	9130008F23Rik	RIKEN cDNA 9130008F23 gene [Source:MGI Symbol;Acc:MGI:1918833]	protein_coding	TCTGTTATTACCTGTGATATTCAATACATTTGACCCGCGGTTGTATTGAGGGGCCATATC	9130008F23Rik	RIKEN cDNA 9130008F23 gene	chr17:41013364-41013305	NM_027834	71583	9130008F23RIK	11.9779	11.2025	11.6905	9.18192	8.86514	8.77673
A_52_P502141	-2.68216	9.0031	-12.4538	2.21252e-05	0.0031187	3.57747	ENSMUSG00000041180	Gencode.M18_pc	Hectd2	HECT domain E3 ubiquitin protein ligase 2 [Source:MGI Symbol;Acc:MGI:2442663]	protein_coding	GGATGACTCATGGAAATAGTATTGGTTTGGTCTGCATGTCTAACGATGTGTGTGTATTGG	Hectd2	HECT domain E3 ubiquitin protein ligase 2	chr19:36695106-36695165	NM_172637	226098	HECTD2	9.89367	10.4212	10.7177	7.67578	7.55813	7.75216
A_52_P550173	-2.68008	11.2401	-6.1248	0.00100858	0.0203232	-0.552435	ENSMUSG00000015316	Gencode.M18_pc	Slamf1	signaling lymphocytic activation molecule family member 1 [Source:MGI Symbol;Acc:MGI:1351314]	protein_coding	TTTTAGAGCCTCTTATGCTTCAAACAACAGAATGAAATCCATCCAATGTTCTTCAAAGTG	Slamf1	signaling lymphocytic activation molecule family member 1	chr1:173730343-173730402	NM_013730	27218	SLAMF1	12.3484	13.2219	12.1702	9.28941	9.74295	10.6679
A_51_P463765	-2.674	12.3739	-6.31305	0.000864127	0.0187786	-0.380753	ENSMUSG00000020044	Gencode.M18_pc	Timp3	tissue inhibitor of metalloproteinase 3 [Source:MGI Symbol;Acc:MGI:98754]	protein_coding	ATAGTGACTTTTGGGGATAGATCTGTCTGGGAGATAATGTGAGTCCAGGAGGCATTACTC	Timp3	tissue inhibitor of metalloproteinase 3	chr10:85811696-85811755	NM_011595	21859	TIMP3	13.6642	14.3613	13.1072	11.0033	10.4515	11.656
A_55_P2183208	-2.66764	10.3837	-7.25014	0.000421024	0.0129634	0.415384	ENSMUSG00000062551	Gencode.M18_pc	Prl2c1	Prolactin family 2, subfamily c, member 1 [Source:MGI Symbol;Acc:MGI:3649927]	protein_coding	TGAAGCTCTTCTGAAATCAGGAGAAATGATTTTGGATGCCTGGGAAAGCCCTCTGGATGA	Prl2c1	Prolactin family 2, subfamily c, member 1	chr13:27948312-27948371	NM_001045532	666317	PRL2C1	11.4006	12.4631	11.2889	9.12569	8.63281	9.39118
A_55_P2024841	-2.66687	11.4094	-6.95642	0.000522973	0.0145174	0.175812	ENSMUSG00000001663	Gencode.M18_pc	Gstt1	glutathione S-transferase, theta 1 [Source:MGI Symbol;Acc:MGI:107379]	protein_coding	ACTATAATCACTACTTTCCCCTTGAGTCTGGGTAATAAACTGGGGCTTGATTTGGGCTTT	Gstt1	glutathione S-transferase, theta 1	chr10:75246619-75246560	NM_008185	14871	GSTT1	12.3093	12.7152	13.2039	9.97543	9.48593	10.7665
A_51_P440047	-2.66649	13.534	-5.86635	0.00125461	0.0227038	-0.795086	ENSMUSG00000042363	Gencode.M18_pc	Lgalsl	lectin, galactoside binding-like [Source:MGI Symbol;Acc:MGI:1916114]	protein_coding	AGTTTCAAATCTTGCCAACTTCTCTACAACTCCCTAAGAGATCACTCTTAGAGTTGATGA	Lgalsl	lectin, galactoside binding-like	chr11:20723884-20723825	NM_173752	216551	LGALSL	14.8109	15.6244	14.1664	11.7892	11.9429	12.8701
A_55_P2078138	-2.66105	7.84791	-10.7726	4.94916e-05	0.00456709	2.73676	ENSMUSG00000051596	Gencode.M18_pc	Otop1	otopetrin 1 [Source:MGI Symbol;Acc:MGI:2388363]	protein_coding	TTTGGCTTTGAACCCTGGATAATTGTGGTCAACCTGGCCATGCCCTTTTCCATTTTCTAC	Otop1	otopetrin 1	chr5:38694026-38694085	NM_172709	21906	OTOP1	8.94763	9.7485	8.83917	6.52727	6.52703	6.49787
A_55_P1995572	-2.65235	12.9937	-8.52821	0.000177235	0.00836006	1.36486	ENSMUSG00000020160	Gencode.M18_pc	Meis1	Meis homeobox 1 [Source:MGI Symbol;Acc:MGI:104717]	protein_coding	GTCATGTGTGTATTTTTCCATAGTCCCACCTTGGAGCATTTATGTAGACATTGTAAATAA	Meis1	Meis homeobox 1	chr11:18780754-18780695	NM_001193271	17268	MEIS1	14.385	14.8859	13.6887	11.5071	11.605	11.8905
A_52_P663757	-2.65019	9.76184	-7.42082	0.000372414	0.0122542	0.550684	ENSMUSG00000027692	Gencode.M18_pc	Tnik	TRAF2 and NCK interacting kinase [Source:MGI Symbol;Acc:MGI:1916264]	protein_coding	TGGGACAAATTCAGCAATAGATCTGGGTTGAATTTAGCAACTACCATAATTGGATGCTGA	Tnik	TRAF2 and NCK interacting kinase	chr3:28569035-28569094	NM_026910	665113	TNIK	10.8748	11.754	10.632	8.32159	8.07499	8.91366
A_66_P120414	-2.64718	7.36838	-5.68545	0.0014681	0.0246457	-0.969878	ENSMUSG00000022840	Gencode.M18_pc	Adcy5	adenylate cyclase 5 [Source:MGI Symbol;Acc:MGI:99673]	protein_coding	ATGTTTCCCCTTGGCAGAAGACTCTGCTAGACTCGAGTTGAACCTTGAGTTTTCTGACAA	Adcy5	adenylate cyclase 5	chr16:35304041-35304100	NM_001012765	224129	ADCY5	8.62432	9.59187	7.85974	5.80777	5.81099	6.51562
A_55_P2032232	-2.64456	7.21903	-29.3307	1.71763e-07	0.000327488	7.84849	ENSMUSG00000020599	Gencode.M18_pc	Rgs9	regulator of G-protein signaling 9 [Source:MGI Symbol;Acc:MGI:1338824]	protein_coding	GTGGGCCAGAAGATATCCCTTGCTGCCTTAAAAACAATAAAAGGGTCACCTGGAGAAATT	Rgs9	regulator of G-protein signaling 9	chr11:109086728-109086669	NM_011268	19739	RGS9	8.67544	8.47215	8.47633	5.93585	5.93946	5.81494
A_51_P277336	-2.63656	12.3992	-4.8416	0.00321789	0.0383838	-1.84298	ENSMUSG00000045954	Gencode.M18_pc	Cavin2	caveolae associated 2 [Source:MGI Symbol;Acc:MGI:99513]	protein_coding	AGTGAGGTGAATAATGGGTGTTGATGGTGTAACCTCTTCAGCTGTGTTCCTGTACTGCAA	Cavin2	caveolae associated 2	chr1:51359651-51359710	NM_138741	20324	CAVIN2	13.5191	14.5494	13.0839	10.7266	10.4811	12.035
A_55_P2100088	-2.63488	6.37996	-21.126	1.11918e-06	0.000835093	6.41056	ENSMUSG00000069814	Gencode.M18_pc	Ccdc92b	coiled-coil domain containing 92B [Source:MGI Symbol;Acc:MGI:3588240]	protein_coding	GGTGACTGTCATATGCCTTATTCTTAATAAAATGTTTGGAAAACATGGAGTCCATTCTCA	Ccdc92b	coiled-coil domain containing 92B	chr11:74454959-74455018	NM_001013784	432582	CCDC92B	7.56145	7.63198	7.89876	4.93505	5.20845	5.04403
A_51_P437608	-2.63189	8.453	-5.93013	0.00118802	0.0220485	-0.73444	ENSMUSG00000001521	Agilent eArray	Tulp3	tubby-like protein 3	protein_coding	AGTGTACCTGAACTTAAGAATTCAAAAACTTTGGGTCTACATTCAGTGGGTCCCCCACTC	Tulp3	tubby-like protein 3	chr6:128271161-128271152	NM_011657	22158	TULP3	9.48389	10.4979	9.32503	7.1306	6.48507	7.79549
A_52_P117408	-2.6304	8.26766	-15.5007	6.47801e-06	0.00170052	4.80715	ENSMUSG00000053469	Gencode.M18_pc	Tg	thyroglobulin [Source:MGI Symbol;Acc:MGI:98733]	protein_coding	AGAGTGAAGAGGAAGACTTGGAAGTTGGACCTGGATTAGAAGAAGACCTCTCAGGCTCAC	Tg	thyroglobulin	chr15:66682078-66682137	NM_009375	21819	TG	9.35703	9.66364	9.72791	6.81519	6.78792	7.25427
A_52_P677891	-2.62739	10.7128	-6.01526	0.00110537	0.0212318	-0.654278	ENSMUSG00000078670	Gencode.M18_pc	Fam174b	family with sequence similarity 174, member B [Source:MGI Symbol;Acc:MGI:3698178]	protein_coding	GTGACCCTTGTTATCTCAGTTCCTTTTCATCTTTGTCCTAGGGTTTGTTTGTGTATTTGC	Fam174b	family with sequence similarity 174, member B	chr7:80921166-80921225	NM_001162532	100038347	FAM174B	12.0539	12.698	11.3276	9.9787	8.81697	9.40169
A_52_P650387	-2.62457	8.67946	-7.34723	0.000392529	0.0125542	0.492694	ENSMUSG00000044707	Gencode.M18_pc	Ccnjl	cyclin J-like [Source:MGI Symbol;Acc:MGI:2685723]	protein_coding	GTGAGGACTGCATACATCCGGACTTCTCAAAGACTACTTTTCATAGCCATACCACTGAAA	Ccnjl	cyclin J-like	chr11:43399495-43399554	NM_001045530	380694	CCNJL	10.1755	10.6112	9.18851	7.3929	7.30209	7.40654
A_52_P446457	-2.62368	11.1808	-5.67162	0.00148607	0.0247514	-0.98341	ENSMUSG00000034923	Gencode.M18_pc	Ly6g6f	lymphocyte antigen 6 complex, locus G6F [Source:MGI Symbol;Acc:MGI:3616082]	protein_coding	CCAGGGGTCTCGGGACAGAGAACCCTCAGTTCCTCATTTCAAGCCTGAAGTCCAGGTCTA	Ly6g6f	lymphocyte antigen 6 complex, locus G6F	chr17:35218024-35217819	NM_001163192	433099	LY6G6F	12.3182	13.2074	11.9524	9.37037	9.56634	10.6702
A_51_P464308	-2.61835	9.00137	-10.429	5.91797e-05	0.0049626	2.5471	ENSMUSG00000027669	Gencode.M18_pc	Gnb4	guanine nucleotide binding protein (G protein), beta 4 [Source:MGI Symbol;Acc:MGI:104581]	protein_coding	TCTTAGATGATGGACAAATCATTACAAGTTCGGGAGACACGACTTGTGCTTTGTGGGACA	Gnb4	guanine nucleotide binding protein (G protein), beta 4	chr3:32488964-32488819	NM_013531	14696	GNB4	10.8075	10.1741	9.95013	7.58319	7.52528	7.96811
A_52_P89049	-2.61704	7.09262	-8.62144	0.000167141	0.00814917	1.42876	ENSMUSG00000052572	Gencode.M18_pc	Dlg2	discs large MAGUK scaffold protein 2 [Source:MGI Symbol;Acc:MGI:1344351]	protein_coding	ACACTTCAGTCTGTAAATATTCTTCCTCACTGAAACCTGTGCTTCAGAAACCATTTCTCG	Dlg2	discs, large homolog 2 (Drosophila)	chr7:99597105-99597164	NM_011807	23859	DLG2	7.82105	8.63442	8.74797	5.55754	5.60194	6.19283
A_55_P1963975	-2.61294	6.62034	-7.40907	0.000375544	0.0122542	0.541461	ENSMUSG00000021338	Gencode.M18_pc	Carmil1	capping protein regulator and myosin 1 linker 1 [Source:MGI Symbol;Acc:MGI:1915982]	protein_coding	CAAAAAAGTCTCCTCGGACAAGGAGCGTGACGGCCAGAACAGCTCACAGTCCAGTCCTAG	Carmil1	capping protein regulator and myosin 1 linker 1	chr13:24114441-24114382	NM_026825	68732	CARMIL1	7.82508	8.69232	7.26304	5.30942	5.27016	5.36205
A_52_P326214	-2.61198	10.0959	-9.26064	0.000113426	0.00657434	1.84938	ENSMUSG00000031078	Gencode.M18_pc	Cttn	cortactin [Source:MGI Symbol;Acc:MGI:99695]	protein_coding	GGTTCACACTACAGAGCATCTGCGTGTGTTTGAGTTGGTTTCTGCTTCCGTTTCTGTTTT	Cttn	cortactin	chr7:151622835-151622776	NM_007803	13043	CTTN	11.5851	11.5914	11.0292	8.47558	8.56147	9.33273
A_55_P2027766	-2.60693	8.06918	-7.76102	0.000293643	0.0108105	0.812197	ENSMUSG00000029207	Gencode.M18_pc	Apbb2	amyloid beta (A4) precursor protein-binding, family B, member 2 [Source:MGI Symbol;Acc:MGI:108405]	protein_coding	AGAGTCACGACCAATGTGAAACGAGGGGTCTTATCCCTCATTGACACTTTGAAACAGAAG	Apbb2	amyloid beta (A4) precursor protein-binding, family B, member 2	chr5:66693864-66693805	NM_009686	11787	APBB2	9.14668	9.90082	9.07044	6.3083	6.67327	7.31558
A_51_P176365	-2.60432	9.99777	-12.2662	2.40801e-05	0.00321146	3.49018	ENSMUSG00000043505	Gencode.M18_pc	Gimap5	GTPase, IMAP family member 5 [Source:MGI Symbol;Acc:MGI:2442232]	protein_coding	ATTAATTTCACTCTCATTTGATTCCCATGGATCAGACATGCCAGGGAATCTTCTTTTAAA	Gimap5	GTPase, IMAP family member 5	chr6:48703501-48703560	NM_175035	317757	GIMAP5	11.3369	11.6413	10.9216	8.89358	8.46162	8.73164
A_51_P281333	-2.59431	10.8659	-6.34227	0.000843909	0.0186478	-0.35447	ENSMUSG00000022747	Gencode.M18_pc	St3gal6	ST3 beta-galactoside alpha-2,3-sialyltransferase 6 [Source:MGI Symbol;Acc:MGI:1888707]	protein_coding	AATGGTGATCAACTTGACTTAAAATTGACCCTATGGATCCAAAAGATGATGATGCTAAAC	St3gal6	ST3 beta-galactoside alpha-2,3-sialyltransferase 6	chr16:58470781-58470722	NM_018784	54613	ST3GAL6	12.0557	12.7568	11.6765	9.14087	9.26447	10.3008
A_66_P133553	-2.59118	6.21368	-5.54844	0.00165777	0.026199	-1.10506	ENSMUSG00000040729	Gencode.M18_pc	Cep126	centrosomal protein 126 [Source:MGI Symbol;Acc:MGI:2680221]	protein_coding	AAATTTTGTACAAGTATATAAGAAACTTATTATTAATAACATCCCCATAAATAATAAAGC	Cep126	centrosomal protein 126	chr9:8076537-8076478	XM_006509863	234915	CEP126	7.34723	8.54118	6.63939	4.95491	4.87716	4.92218
A_66_P124858	-2.5896	8.75155	-10.3443	6.18968e-05	0.00505016	2.49933	ENSMUSG00000047842	Agilent eArray	Diras2	DIRAS family, GTP-binding RAS-like 2	protein_coding	GGCAGCGATGGCCCCAGTCCATGGAACCAGTTACAATAAAGCTCAGTTACAGCACCCTGG	Diras2	DIRAS family, GTP-binding RAS-like 2	chr13:52599802-52599744	NM_001024474	68203	DIRAS2	9.8895	10.5391	9.71045	7.49655	7.18626	7.68745
A_52_P683441	-2.58887	9.63701	-6.22973	0.000924898	0.0194009	-0.456221	ENSMUSG00000035547	Gencode.M18_pc	Capn5	calpain 5 [Source:MGI Symbol;Acc:MGI:1100859]	protein_coding	AAGCCTTGAAGACTGGACAAGGGAGGACAGGGTGGAGCAGGGATAGCCGTGGCTTCATTT	Capn5	calpain 5	chr7:105270305-105270246	NM_007602	12337	CAPN5	11.1939	11.5287	10.0717	8.08276	8.16211	8.78285
A_55_P2050508	-2.58807	8.35134	-5.29142	0.00209468	0.0302318	-1.36538	ENSMUSG00000026532	Gencode.M18_pc	Spta1	spectrin alpha, erythrocytic 1 [Source:MGI Symbol;Acc:MGI:98385]	protein_coding	CCCTCCTCAATCTTTGGGAAAAAATTCTCACAGGATCTAATTAAAATACTTATGGCTACA	Spta1	spectrin alpha, erythrocytic 1	chr1:176178501-176178560	NM_011465	20739	SPTA1	9.23652	10.2904	9.40916	6.33611	6.86379	7.97202
A_51_P507509	-2.58706	11.9105	-8.58748	0.000170738	0.00821402	1.40556	ENSMUSG00000090019	Gencode.M18_pc	Gimap1	GTPase, IMAP family member 1 [Source:MGI Symbol;Acc:MGI:109368]	protein_coding	GCTCAGAGCTTTAATGATTCACAGTGCAGTGACTTGGCATCAACTTTGCTAAGGTTCTGT	Gimap1	GTPase, IMAP family member 1	chr6:48693409-48693468	NM_008376	16205	GIMAP1	13.3635	13.6353	12.6134	10.9598	10.3613	10.5299
A_55_P1972605	-2.58518	13.2733	-7.95852	0.000256834	0.010039	0.959221	ENSMUSG00000000562	Gencode.M18_pc	Adora3	adenosine A3 receptor [Source:MGI Symbol;Acc:MGI:104847]	protein_coding	TTAAAAAGAGGGCTAAATCCACCTGTGTGGGTGCATTTGAGCAAATAAAAGATGATGCCC	Adora3	adenosine A3 receptor	chr3:105711212-105711271	NM_009631	11542	ADORA3	14.6599	14.9919	14.0459	12.429	11.5155	11.9977
A_55_P1956812	-2.5821	7.29218	-33.0228	8.70808e-08	0.00024776	8.28672	ENSMUSG00000042377	Gencode.M18_pc	Fam83g	family with sequence similarity 83, member G [Source:MGI Symbol;Acc:MGI:1916890]	protein_coding	TCAGATGTATGGTGGATGTTACTGTCACAATAAAGTTCAAAGTGGCCAGTGCCCATCAGA	Fam83g	family with sequence similarity 83, member G	chr11:61523393-61523452	NM_178618	69640	FAM83G	8.61754	8.55234	8.57982	5.90212	6.01332	6.08795
A_52_P64687	-2.5759	6.71505	-8.90292	0.000140483	0.00746207	1.61767	ENSMUSG00000046447	Gencode.M18_pc	Camk2n1	calcium/calmodulin-dependent protein kinase II inhibitor 1 [Source:MGI Symbol;Acc:MGI:1913509]	protein_coding	ATCTTTGAATGAACCCCATTTTAAAGCAGAAAGTAACTTTTCTACGGACTGATGCTTTGG	Camk2n1	calcium/calmodulin-dependent protein kinase II inhibitor 1	chr4:138013368-138013427	NM_025451	66259	CAMK2N1	7.71321	7.62494	8.67084	5.53369	5.37197	5.37564
A_55_P2015715	-2.57458	10.902	-13.24	1.57144e-05	0.00258759	3.92713	ENSMUSG00000019478	Gencode.M18_pc	Rab4a	RAB4A, member RAS oncogene family [Source:MGI Symbol;Acc:MGI:105069]	protein_coding	AATGCTAAACCCACAGGACTCATTAACACCTGGAAATAAAGTGGAACGGAGTTTCTCACG	Rab4a	RAB4A, member RAS oncogene family	chr8:126359128-126359187	NM_009003	19341	RAB4A	12.2276	12.1996	12.1406	9.77051	9.18103	9.89248
A_51_P297069	-2.56655	7.891	-16.6703	4.29505e-06	0.00153443	5.20078	ENSMUSG00000028328	Agilent eArray	Tmod1	tropomodulin 1	protein_coding	CTAGACTGTAGTCGGACCTTTTATAAAACATGGCTAATGTGAAAGCTTTTTCTTTAGGCA	Tmod1	tropomodulin 1	chr4:46127384-46127441	NM_021883	21916	TMOD1	9.14354	9.03848	9.34081	6.3965	6.54371	6.88295
A_55_P1969032	-2.56317	7.16432	-27.2765	2.60253e-07	0.00039283	7.55782	ENSMUSG00000020599	Gencode.M18_pc	Rgs9	regulator of G-protein signaling 9 [Source:MGI Symbol;Acc:MGI:1338824]	protein_coding	AGGCATGTGGGCCAGAAGATATCCCTTGCTGCCTTAAAAACAATAAAAGGGTCACCTGGA	Rgs9	regulator of G-protein signaling 9	chr11:109086734-109086675	NM_011268	19739	RGS9	8.4885	8.46867	8.38054	5.9245	5.99199	5.7317
A_52_P207335	-2.56315	9.50684	-5.10715	0.0024896	0.0332582	-1.55758	ENSMUSG00000039611	Gencode.M18_pc	Tmem246	transmembrane protein 246 [Source:MGI Symbol;Acc:MGI:1914313]	protein_coding	AGACTTGAATTAGGATTTTAAGGGTAGAGTATGGTGAACAGTCAGACGCTTTTGAACAAA	Tmem246	transmembrane protein 246	chr4:49598471-49598412	NM_025944	67063	TMEM246	11.0138	11.541	9.81041	8.1195	7.75273	8.80356
A_55_P2090025	-2.5577	7.6014	-8.16269	0.000224286	0.00933813	1.10768	ENSMUSG00000051855	Gencode.M18_pc	Mest	mesoderm specific transcript [Source:MGI Symbol;Acc:MGI:96968]	protein_coding	CCTCTCATTTCTGTGACATCTGACCAAATAAATAGAGCTGCTGTTGTTTTGTGTTATTAG	Mest	mesoderm specific transcript	chr6:30697385-30697444	NM_001252292	17294	MEST	9.09931	8.58072	8.96072	5.7524	6.30498	6.91025
A_55_P2172470	-2.55767	10.4143	-8.28904	0.000206546	0.00895722	1.1978	ENSMUSG00000053310	Gencode.M18_pc	Nrgn	neurogranin [Source:MGI Symbol;Acc:MGI:1927184]	protein_coding	AGCCAAGTCCGTGCCCTTTTTAGCTCTTCAGTCTAACGTGGTCTCCTTTTGCCTTTTCTC	Nrgn	neurogranin	chr9:37352753-37352694	NM_022029	64011	NRGN	11.6433	12.0267	11.4094	8.64566	9.03742	9.72329
A_51_P312336	-2.55436	11.7415	-5.90767	0.001211	0.0222794	-0.755739	ENSMUSG00000059336	Gencode.M18_pc	Slc14a1	solute carrier family 14 (urea transporter), member 1 [Source:MGI Symbol;Acc:MGI:1351654]	protein_coding	TAAGAAACGTTAGTTAGCTTTTTGTTCCAAGCTGACCGAGCTGTGGGAAGAACTTTGTTG	Slc14a1	solute carrier family 14 (urea transporter), member 1	chr18:78298585-78298526	NM_028122	108052	SLC14A1	13.0333	13.6446	12.3781	10.2129	10.0049	11.175
A_51_P252859	-2.55409	7.43469	-7.01119	0.000501967	0.0142398	0.221145	ENSMUSG00000028195	Gencode.M18_pc	Cyr61	cysteine rich protein 61 [Source:MGI Symbol;Acc:MGI:88613]	protein_coding	AAGATTAGTTGGGCCAAGTGAAAGCCCTGCTTGTCCTTTGACAGAAGTAAATGAAAGCGC	Cyr61	cysteine rich protein 61	chr3:145310246-145310187	NM_010516	16007	CYR61	9.03294	7.85889	9.24338	6.15947	6.15547	6.15801
A_55_P2052145	-2.55317	8.15455	-7.19985	0.000436721	0.0131378	0.37498	ENSMUSG00000073413	Agilent eArray	Ly6g6d	lymphocyte antigen 6 complex, locus G6D	protein_coding	AGACAAACACTCCCTTGTGTGCCGTTAAAATTGATGAACTATTCTAGAGAGGACTGTAAA	Ly6g6d	lymphocyte antigen 6 complex, locus G6D	chr17:35208412-35208353	NM_033478	114654	LY6G6D	9.38846	9.93665	8.96829	6.52365	6.61172	7.49851
A_55_P2163928	-2.55167	8.62231	-5.29607	0.00208569	0.030187	-1.3606	ENSMUSG00000051851	Gencode.M18_pc	Rtl8c	retrotransposon Gag like 8C [Source:MGI Symbol;Acc:MGI:1920115]	protein_coding	ACATGTTAGTAGATGAGAAGACCTTCGACACCGACAAACGCAAGGTGATGTTCCTCATCA	Cxx1c	CAAX box 1C	chrX:50911368-50911427	NM_028375	72865	RTL8C	9.73264	10.8035	9.15831	7.23699	6.87221	7.93025
A_51_P234956	-2.55161	6.12385	-26.8602	2.84182e-07	0.000410665	7.49415	ENSMUSG00000026573	Gencode.M18_pc	Xcl1	chemokine (C motif) ligand 1 [Source:MGI Symbol;Acc:MGI:104593]	protein_coding	TCACCAAACGAGGACTAAAAATTTGTGCTGATCCAGAAGCCAAATGGGTGAAAGCAGCGA	Xcl1	chemokine (C motif) ligand 1	chr1:166862079-166862020	NM_008510	16963	XCL1	7.30315	7.3269	7.56893	4.86094	4.86672	4.81648
A_55_P1954365	-2.5481	8.73393	-19.2508	1.89912e-06	0.00109203	5.95043	ENSMUSG00000033209	Gencode.M18_pc	Ttc28	tetratricopeptide repeat domain 28 [Source:MGI Symbol;Acc:MGI:2140873]	protein_coding	GGCGCTTGGCCCTTCCTTTGTGATTCAGTGTCTATTAAAGCATGAGCCTGTCAGTTTTAA	Ttc28	tetratricopeptide repeat domain 28	chr5:111718740-111718799	NM_001267622	209683	TTC28	9.92233	10.2669	9.83476	7.53977	7.46595	7.37394
A_51_P268094	-2.54558	11.593	-7.06495	0.000482289	0.0138899	0.265351	ENSMUSG00000026249	Gencode.M18_pc	Serpine2	serine (or cysteine) peptidase inhibitor, clade E, member 2 [Source:MGI Symbol;Acc:MGI:101780]	protein_coding	AAGCAAAAATTGAAGTCAGTGAAGATGGAACCAAAGCTTCAGCAGCAACAACTGCAATCC	Serpine2	serine (or cysteine) peptidase inhibitor, clade E, member 2	chr1:79796093-79793476	NM_009255	20720	SERPINE2	12.8615	13.5335	12.2023	10.306	10.0096	10.645
A_51_P440865	-2.54196	8.22065	-7.68787	0.000308805	0.0110786	0.756862	ENSMUSG00000049119	Gencode.M18_pc	Fam110b	family with sequence similarity 110, member B [Source:MGI Symbol;Acc:MGI:1916593]	protein_coding	AGAATCATCAAGTGGCTATATAGCATCAAACAAGCTAGAGAGTCACAGAAGGTGTCCCAC	Fam110b	family with sequence similarity 110, member B	chr4:5726766-5726825	NM_173426	242297	FAM110B	9.50331	10.1518	8.81977	6.93723	6.84718	7.0646
A_52_P87503	-2.53522	7.63478	-5.3035	0.00207139	0.0300823	-1.35294	ENSMUSG00000073063	Gencode.M18_pc	Hbq1b	hemoglobin, theta 1B [Source:MGI Symbol;Acc:MGI:3613460]	protein_coding	CACTATCCTGGAGACTTCAGCCCAGAGATGCATGCCTCCTTGGACAAGTTTCTGGGTCAC	Hbq1b	hemoglobin, theta 1B	chr11:32187550-32187609	NM_001033981	544763	HBQ1B	8.13309	8.67693	9.89715	6.00098	6.31851	6.78203
A_51_P142896	-2.53277	11.3992	-4.71388	0.00365281	0.0412361	-1.98389	ENSMUSG00000032679	Gencode.M18_pc	Cd59a	CD59a antigen [Source:MGI Symbol;Acc:MGI:109177]	protein_coding	AGTGAGTGGGCCAGGAGGATTCTCTTTACCACTCTGACACGCTCAAAATGCTTTCATAAT	Cd59a	CD59a antigen	chr2:103954688-103954747	NM_007652	12509	CD59A	12.2792	13.8206	11.8971	9.82414	9.93806	10.6363
A_51_P489138	-2.5301	6.92006	-8.55824	0.000173908	0.00832075	1.38551	ENSMUSG00000021061	Gencode.M18_pc	Sptb	spectrin beta, erythrocytic [Source:MGI Symbol;Acc:MGI:98387]	protein_coding	CACTCGACACACTGGACTGACTTTGTGGGAACCCTGTGAACTCCAGGGATGGGCTCTCAT	Sptb	spectrin beta, erythrocytic	chr12:77682148-77682089	NM_013675	20741	SPTB	8.16651	8.70781	7.681	5.33117	5.68129	5.95258
A_51_P389650	-2.5225	6.37393	-4.54827	0.00431984	0.0455047	-2.17017	ENSMUSG00000050425	Gencode.M18_pc	Mrgprb2	MAS-related GPR, member B2 [Source:MGI Symbol;Acc:MGI:2441674]	protein_coding	TGTGTTACTTAGGGATTTACCATCTCCTTTTCATGGGACTCCTTGTAAGTATTCTGTGGT	Mrgprb2	MAS-related GPR, member B2	chr7:55807143-55807084	NM_175531	243979	MRGPRB2	8.84891	7.46877	6.58787	5.03219	5.24364	5.06221
A_55_P2173457	-2.52164	10.9267	-6.33792	0.000846884	0.0186577	-0.358377	ENSMUSG00000099474	Gencode M18	1700097N02Rik	RIKEN cDNA 1700097N02 gene [Source:MGI Symbol;Acc:MGI:1914772]	antisense	CACTTCAATCTGTTTGGCTGGCTTGCTTTGCTTTGCTAAATAAACTGCTTCCATGCTGTC	1700097N02Rik	RIKEN cDNA 1700097N02 gene	chr17:30759453-30759394	NR_045287	67522	1700097N02RIK	12.8603	12.4172	11.2849	9.75798	9.6452	9.59436
A_51_P474169	-2.52114	8.73802	-6.12418	0.0010091	0.0203232	-0.553008	ENSMUSG00000045319	Gencode.M18_pc	Proser2	proline and serine rich 2 [Source:MGI Symbol;Acc:MGI:2442238]	protein_coding	GGGGTCTTGGAATTAGGACCTCTGGGCCTCCATGACTGCGACTTGGTCCAGACTCTGATA	Proser2	proline and serine rich 2	chr2:6021173-6021114	NM_144883	227545	PROSER2	9.93878	10.7901	9.26692	7.20964	7.33043	7.89229
A_55_P2128303	-2.5205	8.90127	-6.64753	0.000662336	0.0164548	-0.0857467	ENSMUSG00000035847	Gencode.M18_pc	Ids	iduronate 2-sulfatase [Source:MGI Symbol;Acc:MGI:96417]	protein_coding	GACAGTTTTTCCTGTATATTTGTTCTAAGCGTAGAACAACTCTATTTGGGACCTGAATAA	Ids	iduronate 2-sulfatase	chrX:67596323-67596264	NM_010498	15931	IDS	10.3691	10.7268	9.38865	7.2346	7.82176	7.8667
A_52_P393314	-2.51435	12.5391	-8.35023	0.000198543	0.00882861	1.24098	ENSMUSG00000029468	Gencode.M18_pc	P2rx7	purinergic receptor P2X, ligand-gated ion channel, 7 [Source:MGI Symbol;Acc:MGI:1339957]	protein_coding	TTCACTTCTCTCTTTAAAGGGAACCATCTTCTAAACTCTTCCTAATTTCGTGTAAGGGTT	P2rx7	purinergic receptor P2X, ligand-gated ion channel, 7	chr5:123134194-123134253	NM_011027	18439	P2RX7	13.5834	14.375	13.4306	11.0594	11.109	11.6776
A_66_P106385	-2.50647	12.9581	-12.1321	2.56012e-05	0.00325414	3.42686	ENSMUSG00000026401	Gencode.M18_pc	Cd55b	CD55 molecule, decay accelerating factor for complement B [Source:MGI Symbol;Acc:MGI:104849]	protein_coding	AGAAACCTTCCACAGTTAAAGTTCCAGCAACCCAGCATGAACCTGATACCACGACAAGAA	Cd55b	CD55 molecule, decay accelerating factor for complement B	chr1:132307996-132307236	NM_007827	13137	CD55B	14.1179	14.6241	13.8921	11.6753	11.5566	11.8828
A_51_P355753	-2.50602	10.2821	-6.45639	0.000770021	0.0176929	-0.252787	ENSMUSG00000043099	Gencode.M18_pc	Hic1	hypermethylated in cancer 1 [Source:MGI Symbol;Acc:MGI:1338010]	protein_coding	CTTTGTATATTCTCTACTCTGTACACAGGCTCTTCCAGAGCCGCTTCCATTTTCTATACT	Hic1	hypermethylated in cancer 1	chr11:74978166-74978107	NM_010430	15248	HIC1	11.3181	12.3678	10.9194	8.84959	9.34267	8.89495
A_55_P1974984	-2.50505	7.95651	-5.12712	0.00244291	0.032923	-1.53651	ENSMUSG00000116656	Gencode M18	AC131339.2	novel transcript	processed_transcript	CAGAGACCTTGAGTCAGAGGAAGTGAAAAATTTGAGGATAAGTCCTCAGGGAGAGAAAAA	NA	NA	chr4:3126607-3126548	BC054084	NA	AC131339.2	8.99368	10.2769	8.35655	6.70998	6.46063	6.94134
A_55_P2197638	-2.50315	8.86525	-15.2344	7.14292e-06	0.00172506	4.71213	ENSMUSG00000085457	Gencode M18	1110046J04Rik	RIKEN cDNA 1110046J04 gene [Source:MGI Symbol;Acc:MGI:1916058]	antisense	TGCTTCATGACTGTGGACACAATGTGGACTAGCTACTTCATAGCCCTCATTAAACGGTGA	1110046J04Rik	RIKEN cDNA 1110046J04 gene	chr13:34051986-34052045	NR_040707	68808	1110046J04RIK	10.0623	10.2068	10.0813	7.30394	7.62055	7.91653
A_55_P2004541	-2.5014	6.29335	-14.1604	1.07788e-05	0.00216929	4.30634	ENSMUSG00000067599	Gencode.M18_pc	Klra7	killer cell lectin-like receptor, subfamily A, member 7 [Source:MGI Symbol;Acc:MGI:101901]	protein_coding	TCTGTATTTGTGGTAAGAGACTGGATAAATTTCCTCATTGACTCTCCAATGAGTGTAAAA	Klra7	killer cell lectin-like receptor, subfamily A, member 7	chr6:130168958-130168899	NM_001110323	16638	KLRA7	7.209	7.82627	7.59689	4.90674	5.02705	5.19417
A_55_P2022971	-2.4948	8.49787	-7.00893	0.000502812	0.0142402	0.219285	ENSMUSG00000030352	Gencode.M18_pc	Tspan9	tetraspanin 9 [Source:MGI Symbol;Acc:MGI:1924558]	protein_coding	TAAAACCCCTCTGACCACCTTGAATAACAGTGATGACCAGGATGTGGAACTTTCAGTACG	Tspan9	tetraspanin 9	chr6:127912879-127912820	NM_175414	109246	TSPAN9	10.0614	10.1233	9.05116	6.88541	7.17151	7.6945
A_66_P115072	-2.48381	6.5626	-16.0474	5.32667e-06	0.00164204	4.99584	ENSMUSG00000079654	Gencode.M18_pc	Prrt4	proline-rich transmembrane protein 4 [Source:MGI Symbol;Acc:MGI:2141677]	protein_coding	AACTTTAGGGTGGCAGGGTTCTACTTTCCTTGGCTGTCACCAGCAATAAAGCTCCAAGGT	Prrt4	proline-rich transmembrane protein 4	chr6:29119508-29119449	NM_001101443	101359	PRRT4	8.00728	7.74358	7.66266	5.15369	5.22118	5.5872
A_52_P377576	-2.48327	9.97204	-5.52565	0.00169196	0.0264879	-1.12778	ENSMUSG00000054702	Agilent eArray	Ap1s3	adaptor-related protein complex AP-1, sigma 3	protein_coding	CTAAATGTACTACTTACATTCTGGATAATTCCATAGTTGATCTTGTCTAGGTTGCACAAG	Ap1s3	adaptor-related protein complex AP-1, sigma 3	chr1:79604041-79603665	BC054111	252903	AP1S3	12.1639	11.1067	10.3704	8.85136	8.49104	8.84882
A_52_P619192	-2.48287	8.52925	-7.4631	0.000361397	0.0120441	0.583772	ENSMUSG00000040570	Gencode.M18_pc	Rundc3b	RUN domain containing 3B [Source:MGI Symbol;Acc:MGI:2685286]	protein_coding	GGTACACTTTTTCAGATCTGTCCGATAGAAGCACTAGTTTGTGACATATCCCTGCTGCGA	Rundc3b	RUN domain containing 3B	chr5:8490689-8490630	NM_198620	242819	RUNDC3B	9.5758	10.4633	9.27294	7.55526	7.31244	6.99574
A_51_P502872	-2.48212	7.48598	-5.74198	0.00139719	0.024007	-0.914806	ENSMUSG00000030587	Gencode.M18_pc	2200002D01Rik	RIKEN cDNA 2200002D01 gene [Source:MGI Symbol;Acc:MGI:1919525]	protein_coding	GGGAAGGAGTATGCCGCTGGCTGCAAGAAGCATGAACGCTCCTCAGACAAGGCCAAGAAA	2200002D01Rik	RIKEN cDNA 2200002D01 gene	chr7:30032921-30032700	NM_028179	72275	2200002D01RIK	8.24487	8.92167	9.01456	5.85604	5.73185	7.14686
A_55_P2059352	-2.48034	12.3594	-4.80845	0.00332481	0.0392106	-1.87932	ENSMUSG00000001435	Gencode.M18_pc	Col18a1	collagen, type XVIII, alpha 1 [Source:MGI Symbol;Acc:MGI:88451]	protein_coding	GACAATGTGTGCTATGATGCCATTTCAAAGAGGCACCAAATAAAAATGACATTTTATACC	Col18a1	collagen, type XVIII, alpha 1	chr10:76514985-76514926	NM_001109991	12822	COL18A1	13.3346	14.6163	12.8478	10.6027	11.0644	11.6906
A_55_P2066697	-2.47893	10.8217	-13.2614	1.55727e-05	0.00257811	3.93633	ENSMUSG00000020773	Gencode.M18_pc	Trim47	tripartite motif-containing 47 [Source:MGI Symbol;Acc:MGI:1917374]	protein_coding	ACCTTCCACTTTGCAGGACTTGTTTTGAGAACAGATCTTTAGCTGGGACAACTCCAGTCT	Trim47	tripartite motif-containing 47	chr11:115967202-115967143	NM_001205081	217333	TRIM47	12.2769	12.05	11.8568	9.25328	9.65223	9.84133
A_55_P2148641	-2.47629	9.40268	-13.9324	1.1808e-05	0.00229976	4.21523	ENSMUSG00000019478	Gencode.M18_pc	Rab4a	RAB4A, member RAS oncogene family [Source:MGI Symbol;Acc:MGI:105069]	protein_coding	GAGAACGTCGAAGAGGCTTTCATGCAGTGTGCAAGGAAAATACTTAACAAAATTGAATCA	Rab4a	RAB4A, member RAS oncogene family	chr8:126356738-126356797	NM_009003	19341	RAB4A	10.6543	10.7775	10.4907	8.40512	7.80813	8.28036
A_55_P1998011	-2.47085	6.42453	-11.5451	3.37304e-05	0.00371572	3.14002	ENSMUSG00000067599	Gencode.M18_pc	Klra7	killer cell lectin-like receptor, subfamily A, member 7 [Source:MGI Symbol;Acc:MGI:101901]	protein_coding	GTGGTAAATCATACATCTGTATTTGTGGTAAGAGACTGGATAAATTCCCTCATTGACTCT	Klra23	killer cell lectin-like receptor subfamily A, member 23	chr6:130241246-130241187	NM_024470	79410	KLRA7	7.22785	7.98447	7.76753	5.17248	5.02642	5.36841
A_66_P130310	-2.46916	6.71618	-8.86907	0.000143413	0.00751848	1.59526	ENSMUSG00000047878	Gencode.M18_pc	A4galt	alpha 1,4-galactosyltransferase [Source:MGI Symbol;Acc:MGI:3512453]	protein_coding	GGTTTGTGGAAATCCTTTAGGTTTTAAAAAAGGAAAAAGAGTTTTAAACTCCCTCCCTGT	A4galt	alpha 1,4-galactosyltransferase	chr15:83057251-83057192	NM_001170954	239559	A4GALT	8.16491	7.31475	8.37261	5.45565	5.55383	5.43533
A_66_P115116	-2.46611	6.18796	-6.86945	0.000558455	0.0150901	0.103187	ENSMUSG00000027803	Gencode.M18_pc	Wwtr1	WW domain containing transcription regulator 1 [Source:MGI Symbol;Acc:MGI:1917649]	protein_coding	GGATATAAAGTGTATTTCTTTCAGTGATTTCTCAGTGCATAAGAAGTGCATAAGTCTCAG	Wwtr1	WW domain containing transcription regulator 1	chr3:57260058-57259999	NM_133784	97064	WWTR1	6.77999	7.28136	8.20171	5.01634	5.05563	4.79274
A_51_P456838	-2.46339	7.46716	-5.30562	0.00206735	0.0300528	-1.35077	ENSMUSG00000035509	Gencode.M18_pc	Fbxl21	F-box and leucine-rich repeat protein 21 [Source:MGI Symbol;Acc:MGI:2442921]	protein_coding	GTATTAGATGTTTAATAGGGTAGACTACAGATGTCTAAGATGTGTATAGACTTCTCAACC	Fbxl21	F-box and leucine-rich repeat protein 21	chr13:56639037-56639096	NM_178674	213311	FBXL21	8.2659	9.71541	8.11524	5.84167	6.56458	6.30013
A_51_P124535	-2.46334	8.13058	-7.10734	0.000467401	0.0136659	0.299997	ENSMUSG00000051855	Gencode.M18_pc	Mest	mesoderm specific transcript [Source:MGI Symbol;Acc:MGI:96968]	protein_coding	TCTGAAAGACCTAAGAGCAAATGGTGCTGAATACTTTTTTAAGCCACAGTTTTAACTTAG	Mest	mesoderm specific transcript	chr6:30698279-30698338	NM_008590	17294	MEST	9.47902	9.14484	9.46289	6.11148	7.25142	7.33384
A_55_P2030524	-2.4526	11.9406	-9.60256	9.30778e-05	0.0059546	2.06259	ENSMUSG00000024924	Gencode.M18_pc	Vldlr	very low density lipoprotein receptor [Source:MGI Symbol;Acc:MGI:98935]	protein_coding	CTTTTTCAATGGTTGGGACAATGGCAATAGGATAAAACGGGTTACTAAGATGAAATTGCC	Vldlr	very low density lipoprotein receptor	chr19:27324050-27324109	NM_013703	22359	VLDLR	13.0715	13.6876	12.7414	10.6377	10.9261	10.5789
A_51_P298802	-2.44814	9.10168	-4.7	0.00370396	0.0415772	-1.99934	ENSMUSG00000032556	Agilent eArray	Bfsp2	beaded filament structural protein 2, phakinin	protein_coding	AGAGAATTCTGCTCCCATTTCTGTAGTCTGAGCTTGAACAACCGAGGCCTCTCTGAATAA	Bfsp2	beaded filament structural protein 2, phakinin	chr9:103327283-103327254	NM_001002896	107993	BFSP2	9.56951	11.5473	9.86041	7.99306	7.89024	7.74952
A_51_P198645	-2.44481	9.80216	-5.52148	0.00169832	0.0265187	-1.13196	ENSMUSG00000022438	Gencode.M18_pc	Parvb	parvin, beta [Source:MGI Symbol;Acc:MGI:2153063]	protein_coding	TGGGATGCGGTGACATTAAAGAGCCACACTGACAAAATACCCGGGACTGGAAGGTTCTGT	Parvb	parvin, beta	chr15:84145053-84145112	NM_133167	170736	PARVB	10.8032	11.8275	10.443	8.10529	8.43568	9.1983
A_55_P2003211	-2.44429	7.49037	-16.8802	4.00142e-06	0.0015238	5.26758	ENSMUSG00000000159	Gencode.M18_pc	Igsf5	immunoglobulin superfamily, member 5 [Source:MGI Symbol;Acc:MGI:1919308]	protein_coding	GCCAGCATCATGAAAGAACTGGAGAGAGACATATACTATTTAATAAACAAATGAAAAGCC	Igsf5	immunoglobulin superfamily, member 5	chr16:96625576-96625635	NM_001177887	72058	IGSF5	8.96966	8.54878	8.6191	6.17697	6.44385	6.18387
A_55_P2156653	-2.43902	10.1179	-13.3944	1.47263e-05	0.0025625	3.99293	ENSMUSG00000073008	Gencode.M18_pc	Gpr174	G protein-coupled receptor 174 [Source:MGI Symbol;Acc:MGI:2685222]	protein_coding	CTTTTGGGTTAACTTCCAAGATACTGTGAAATGTTGTTACTGAAGTTTATTTGCAGCTCT	Gpr174	G protein-coupled receptor 174	chrX:104492005-104492064	NM_001177781	213439	GPR174	11.2067	11.4905	11.3151	8.94066	8.55363	9.201
A_55_P1983754	-2.43763	8.79636	-6.75937	0.000607427	0.0157401	0.0101276	ENSMUSG00000038370	Gencode.M18_pc	Pcp4l1	Purkinje cell protein 4-like 1 [Source:MGI Symbol;Acc:MGI:1913675]	protein_coding	CAGGGCAAACATCGCCACTGTATGTGACTTTAGCATGTTTAATAATGATGACAATAAAAA	Pcp4l1	Purkinje cell protein 4-like 1	chr1:173103482-173103423	NM_025557	66425	PCP4L1	9.99935	10.5164	9.52975	7.13433	7.40643	8.19188
A_55_P2043987	-2.43493	9.62543	-9.15037	0.000121062	0.00682054	1.77892	ENSMUSG00000001089	Gencode.M18_pc	Luzp1	leucine zipper protein 1 [Source:MGI Symbol;Acc:MGI:107629]	protein_coding	GCTCTCTGTTGGCTCTGCAGCACAATATTGTAACCAATAAAGCTCCCTTGTTTCTATATG	Luzp1	leucine zipper protein 1	chr4:136105174-136105233	NM_024452	269593	LUZP1	10.3573	11.3705	10.8009	8.25114	8.37305	8.5997
A_66_P124420	-2.4339	7.2697	-6.82554	0.000577422	0.0153581	0.0662186	ENSMUSG00000032418	Gencode.M18_pc	Me1	malic enzyme 1, NADP(+)-dependent, cytosolic [Source:MGI Symbol;Acc:MGI:97043]	protein_coding	ATTGAAACAAGTGTTGCACATTTAACGATGATATTCAAGGAACAGCGTCTGTTGCGGTTG	NA	NA	chr9:86513370-86507225	NA	NA	ME1	8.40737	9.19114	7.86145	5.9626	5.81536	6.38029
A_55_P2128526	-2.42874	8.78471	-10.1806	6.757e-05	0.00524152	2.40583	ENSMUSG00000027805	Gencode.M18_pc	Pfn2	profilin 2 [Source:MGI Symbol;Acc:MGI:97550]	protein_coding	CCTGCACTTTGTTACATCTGGGATACAGTCTAACTCATCTGACTTAATATGCATTTAAAA	Pfn2	profilin 2	chr3:57645945-57645886	NM_019410	18645	PFN2	9.82548	10.4818	9.69001	7.32417	7.76025	7.62659
A_51_P111669	-2.42454	6.14816	-16.6822	4.27761e-06	0.00153443	5.20463	ENSMUSG00000043441	Gencode.M18_pc	Gpr149	G protein-coupled receptor 149 [Source:MGI Symbol;Acc:MGI:2443628]	protein_coding	AATATTTTGCCTGTTTGTCTAATGAATACACTGTTCTCGTGCATGAGTTTTTGTACACAG	Gpr149	G protein-coupled receptor 149	chr3:62334187-62334128	NM_177346	229357	GPR149	7.2869	7.65105	7.14332	4.97378	4.9881	4.84579
A_55_P2106175	-2.42353	14.5305	-8.11891	0.000230841	0.00940373	1.07614	ENSMUSG00000037580	Gencode.M18_pc	Gch1	GTP cyclohydrolase 1 [Source:MGI Symbol;Acc:MGI:95675]	protein_coding	CGTACATTCCAGTTTCAGTTGGTACACTTGTGAACTTTATGTCTCATCATGAATTGTATT	Gch1	GTP cyclohydrolase 1	chr14:47775407-47775348	NM_008102	14528	GCH1	15.6388	15.9743	15.6137	13.389	12.7144	13.8529
A_51_P454873	-2.4232	8.82435	-5.15551	0.00237828	0.0325074	-1.50668	ENSMUSG00000029819	Gencode.M18_pc	Npy	neuropeptide Y [Source:MGI Symbol;Acc:MGI:97374]	protein_coding	CTCCGCTCTGCGACACTACATCAATCTCATCACCAGACAGAGATATGGCAAGAGATCCAG	Npy	neuropeptide Y	chr6:49773743-49777505	NM_023456	109648	NPY	10.3117	9.0307	10.7654	7.60235	7.25995	7.97595
A_55_P1957245	-2.41897	9.4616	-6.56813	0.00070481	0.0169146	-0.154645	ENSMUSG00000091945	Gencode.M18_pc	Vmn2r114	vomeronasal 2, receptor 114 [Source:MGI Symbol;Acc:MGI:3648252]	protein_coding	AGTTCAGGGATGCTGGGATGCATATTTGTTCCCAAATGTTACACAATATTGTTTAGACCA	NA	NA	chr17:23578097-23578038	NA	NA	VMN2R114	10.464	11.4367	10.1126	8.21451	7.95825	8.58358
A_51_P316042	-2.41599	10.4512	-11.6535	3.20245e-05	0.00361408	3.19422	ENSMUSG00000036526	Gencode.M18_pc	Card11	caspase recruitment domain family, member 11 [Source:MGI Symbol;Acc:MGI:1916978]	protein_coding	AAGAAGCACGAAACATGCGTCCCAGGCTGGGGAGACAGGACTCCTCCTATGCCGTTCTTT	Card11	caspase recruitment domain family, member 11	chr5:141349038-141348979	NM_175362	108723	CARD11	11.7886	11.8696	11.3192	9.01612	9.15151	9.56186
A_55_P2151546	-2.41395	7.54557	-5.63216	0.00153875	0.0252323	-1.02217	ENSMUSG00000020262	Gencode.M18_pc	Adarb1	adenosine deaminase, RNA-specific, B1 [Source:MGI Symbol;Acc:MGI:891999]	protein_coding	GAGATGCTGTTACATGTAGACAAAGGACTGAGATGTTCTCAATAAAGACTAAGACGTTTC	Adarb1	adenosine deaminase, RNA-specific, B1	chr10:76753538-76753479	NM_001024837	110532	ADARB1	8.63116	9.64662	7.97988	6.11258	6.6332	6.27002
A_52_P340073	-2.41389	8.85718	-8.34248	0.000199536	0.00883102	1.23552	ENSMUSG00000001300	Gencode.M18_pc	Efnb2	ephrin B2 [Source:MGI Symbol;Acc:MGI:105097]	protein_coding	GTCATCGGTTGGCTACGTTTTGGTTCTATGCTAAACTGTGAAGAATCGGATGAATTGATG	Efnb2	ephrin B2	chr8:8618236-8618177	NM_010111	13642	EFNB2	9.74638	10.3636	10.0824	8.22325	7.30645	7.421
A_55_P2002802	-2.40844	8.06543	-6.74748	0.000613008	0.0158168	-1.45038e-06	ENSMUSG00000058976	Gencode.M18_pc	Usp17lc	ubiquitin specific peptidase 17-like C [Source:MGI Symbol;Acc:MGI:107698]	protein_coding	CACCCTGTAGAGATAGATGTTCTTATTCTTTGTGTGTGATCAACAATTCTTTGACCAAAT	Usp17lc	ubiquitin specific peptidase 17-like C	chr7:110568320-110568379	BB709898	13532	USP17LC	9.83518	9.03978	8.934	6.33881	6.82854	7.41628
A_55_P2063216	-2.40423	9.30274	-7.33232	0.000396757	0.0126078	0.48088	ENSMUSG00000018648	Gencode.M18_pc	Dusp14	dual specificity phosphatase 14 [Source:MGI Symbol;Acc:MGI:1927168]	protein_coding	CGTGCGTTGCCTGTGACGTTTTTTAAAACTAGCATTTTGAAATAGTGAACATGGAAATCT	Dusp14	dual specificity phosphatase 14	chr11:83861975-83861916	NM_019819	56405	DUSP14	10.2763	10.9891	10.2492	7.58533	8.08885	8.6277
A_55_P2106690	-2.40333	13.9027	-14.854	8.2367e-06	0.00185331	4.57262	ENSMUSG00000028717	Gencode.M18_pc	Tal1	T cell acute lymphocytic leukemia 1 [Source:MGI Symbol;Acc:MGI:98480]	protein_coding	ACAGCCTATAGGCCAACACTGCGGGCGTGTGACTCTTTATTGAAAAACAAAAACAAAAAA	Tal1	T cell acute lymphocytic leukemia 1	chr4:114744219-114744278	NM_001287388	21349	TAL1	15.0452	15.4076	14.8603	12.7472	12.5462	12.8098
A_52_P124734	-2.4032	6.02227	-4.79269	0.00337706	0.0395647	-1.89665	ENSMUSG00000027015	Gencode.M18_pc	Cybrd1	cytochrome b reductase 1 [Source:MGI Symbol;Acc:MGI:2654575]	protein_coding	TGTGACGAGATGTTTAGCTATAAATGTGCACTTTTTAGATAACTCCAACAGGAAACTGTA	Cybrd1	cytochrome b reductase 1	chr2:70980706-70980765	NM_028593	73649	CYBRD1	6.90195	8.38058	6.38908	4.81427	4.83458	4.81317
A_55_P1953459	-2.40232	5.95858	-16.7093	4.23856e-06	0.00153443	5.2133	ENSMUSG00000053110	Gencode.M18_pc	Yap1	yes-associated protein 1 [Source:MGI Symbol;Acc:MGI:103262]	protein_coding	GGCTGTAGTAGGTAGCATACAGGTAAGAACTTAACTGGTTATTCTTGAATTTCTTTTACA	Yap1	yes-associated protein 1	chr9:7932084-7932025	NM_001171147	22601	YAP1	7.1036	7.45201	6.9236	4.74358	4.74493	4.78374
A_52_P109270	-2.40003	7.54271	-9.55609	9.55774e-05	0.00600067	2.03406	ENSMUSG00000038168	Gencode.M18_pc	P3h2	prolyl 3-hydroxylase 2 [Source:MGI Symbol;Acc:MGI:2146663]	protein_coding	GAGGGGAATTCATCTTCACAGAAATGGATGCTAAAACCGTGACTGCCTCTATAAAACCAA	P3h2	prolyl 3-hydroxylase 2	chr16:25968858-25965935	NM_173379	210530	P3H2	8.74292	9.1171	8.36814	6.24594	6.06153	6.72061
A_51_P136355	-2.39828	13.5038	-5.58036	0.00161118	0.0258655	-1.07335	ENSMUSG00000032766	Gencode.M18_pc	Gng11	guanine nucleotide binding protein (G protein), gamma 11 [Source:MGI Symbol;Acc:MGI:1913316]	protein_coding	AGTTATGGAATGAAGGCATGGCTCCCCCACTTTCAGTATACTCCTTGCTGTCTCCAATAA	Gng11	guanine nucleotide binding protein (G protein), gamma 11	chr6:3958364-3958423	NM_025331	66066	GNG11	14.5544	15.4527	14.1019	12.0376	11.9333	12.9432
A_55_P2176565	-2.39828	6.59085	-5.73168	0.00140982	0.0240793	-0.924813	ENSMUSG00000074892	Gencode.M18_pc	B3galt5	UDP-Gal:betaGlcNAc beta 1,3-galactosyltransferase, polypeptide 5 [Source:MGI Symbol;Acc:MGI:2136878]	protein_coding	AGACGCTGCTTACATTCTGCTTCAGGGAAATATCAGAGGAGGAGAGCTGACTCATTTCAC	B3galt5	UDP-Gal:betaGlcNAc beta 1,3-galactosyltransferase, polypeptide 5	chr16:96541170-96541229	NM_001122993	93961	B3GALT5	8.25394	8.2441	6.87192	5.05589	5.71085	5.40838
A_55_P1955656	-2.39549	16.5889	-8.82071	0.000147721	0.00761691	1.5631	ENSMUSG00000044258	Gencode.M18_pc	Ctla2a	cytotoxic T lymphocyte-associated protein 2 alpha [Source:MGI Symbol;Acc:MGI:88554]	protein_coding	AACACTGTGGTGTAAACTCTGAGGCACATTCATGCAATAAAACTACTAGTTTTGGCAGTC	Ctla2a	cytotoxic T lymphocyte-associated protein 2 alpha	chr13:61036193-61036134	NM_007796	13024	CTLA2A	17.7421	17.9286	17.6894	14.8259	15.4583	15.8894
A_55_P1992329	-2.39366	11.7039	-10.6487	5.27541e-05	0.004687	2.66915	ENSMUSG00000000253	Gencode.M18_pc	Gmpr	guanosine monophosphate reductase [Source:MGI Symbol;Acc:MGI:1913605]	protein_coding	AGAGCATTTTGTGGAATTCGTGAAACTGGTCCGATCCAAATTCCCCGAACACACCATCAT	Gmpr	guanosine monophosphate reductase	chr13:45616334-45616393	NM_025508	66355	GMPR	12.8522	13.3498	12.5001	10.6207	10.3516	10.5489
A_52_P336958	-2.39293	10.5453	-19.4731	1.77913e-06	0.00108656	6.00838	ENSMUSG00000033960	Gencode.M18_pc	Jcad	junctional cadherin 5 associated [Source:MGI Symbol;Acc:MGI:2685174]	protein_coding	TGGGAAACCTCTAAAGATGCAACCAGTTCCTGGGAGGGACCATCAGGATTATTTCCATAA	Jcad	junctional cadherin 5 associated	chr18:4682760-4682819	NM_001081963	240185	JCAD	11.9114	11.5173	11.7966	9.31419	9.4476	9.28474
A_55_P2112185	-2.39221	7.21934	-5.92194	0.00119633	0.0221024	-0.742194	ENSMUSG00000039835	Gencode.M18_pc	Nhsl1	NHS-like 1 [Source:MGI Symbol;Acc:MGI:106390]	protein_coding	CACACAGATCATCTCCTGTAAATCTTAGGCCATGTTGACATTTGAATACCTAAAAAAGAT	Nhsl1	NHS-like 1	chr10:18253465-18253524	NM_173390	215819	NHSL1	8.31047	9.19092	7.74496	6.30528	6.19462	5.56982
A_51_P443754	-2.38562	9.0075	-7.3239	0.000399166	0.01264	0.474203	ENSMUSG00000015501	Gencode.M18_pc	Hivep2	human immunodeficiency virus type I enhancer binding protein 2 [Source:MGI Symbol;Acc:MGI:1338076]	protein_coding	TGGATTGCTTTTCTATGTGACGCATGGATTTAACTGTTGCGAAACTAGAACGGAAATGTC	Hivep2	human immunodeficiency virus type I enhancer binding protein 2	chr10:13870069-13870128	NM_010437	15273	HIVEP2	9.90807	10.56	10.1329	7.24204	8.39438	7.80766
A_52_P353478	-2.38466	6.0314	-8.67438	0.000161706	0.00804667	1.46474	ENSMUSG00000034810	Gencode.M18_pc	Scn7a	sodium channel, voltage-gated, type VII, alpha [Source:MGI Symbol;Acc:MGI:102965]	protein_coding	GTCAGTTACATCCTCATATCATGGTTGATCATTGTTAACATGTACATTGTGTTGATCATG	Scn7a	sodium channel, voltage-gated, type VII, alpha	chr2:66514172-66514113	NM_009135	20272	SCN7A	7.54877	6.59534	7.52706	4.71447	4.85758	4.94516
A_52_P408025	-2.38261	6.24421	-5.73429	0.0014066	0.0240469	-0.92227	ENSMUSG00000016386	Gencode.M18_pc	Mpped2	metallophosphoesterase domain containing 2 [Source:MGI Symbol;Acc:MGI:1924265]	protein_coding	TGGAATGTGAGGGACGGTCTACAAACTGCCATTTTTCTAATTATAAACTCACATTCTCTG	Mpped2	metallophosphoesterase domain containing 2	chr2:106707241-106707300	NM_001143683	77015	MPPED2	6.46484	7.82613	8.01557	5.0123	5.18375	4.96267
A_55_P2071626	-2.3791	9.32302	-11.0265	4.35145e-05	0.00426043	2.87268	ENSMUSG00000036377	Gencode.M18_pc	C530008M17Rik	RIKEN cDNA C530008M17 gene [Source:MGI Symbol;Acc:MGI:2444817]	protein_coding	CTTCTGGCAAGGTTATAGATGATTAACCTCTGTTCATAGACTTATATATGGAAGTAGAGT	C530008M17Rik	RIKEN cDNA C530008M17 gene	chr5:77302179-77302238	NM_001163793	320827	C530008M17RIK	10.5083	10.8942	10.1351	7.92956	8.13941	8.33144
A_51_P500882	-2.37839	6.31374	-16.7093	4.23863e-06	0.00153443	5.21328	ENSMUSG00000062524	Gencode.M18_pc	Ncr1	natural cytotoxicity triggering receptor 1 [Source:MGI Symbol;Acc:MGI:1336212]	protein_coding	ATCATGAAGAGGCCAACAGATTAACAAATTGGGAATGCAGGAGAAGATGGAGAATGCAGC	Ncr1	natural cytotoxicity triggering receptor 1	chr7:4296176-4296235	NM_010746	17086	NCR1	7.51244	7.76014	7.23621	5.16386	5.07225	5.13751
A_66_P114768	-2.37142	7.71894	-9.92204	7.78144e-05	0.00551589	2.25488	ENSMUSG00000040270	Gencode.M18_pc	Bach2	BTB and CNC homology, basic leucine zipper transcription factor 2 [Source:MGI Symbol;Acc:MGI:894679]	protein_coding	TGAATTGCTAGTGTTTACTGAATTTTGTCTAGACGCCATTTCTGTTGATGAAATAAAGGC	Bach2	BTB and CNC homology, basic leucine zipper transcription factor 2	chr4:32673009-32673068	NM_001109661	12014	BACH2	9.30564	8.9394	8.46891	6.35987	6.79786	6.44196
A_55_P2155499	-2.36682	10.639	-8.81042	0.000148658	0.0076387	1.55624	ENSMUSG00000026411	Gencode.M18_pc	Tmem9	transmembrane protein 9 [Source:MGI Symbol;Acc:MGI:1913491]	protein_coding	TAGATGGTTGCCATGATTGCATCAGAGACCTGGGCCATGGCTACCAGCTTCTGGGGCTCA	Tmem9	transmembrane protein 9	chr1:137930795-137930854	NM_001160145	66241	TMEM9	11.7166	12.3834	11.3672	9.58327	9.26397	9.51958
A_66_P115580	-2.36676	7.41478	-4.83309	0.00324495	0.0386174	-1.85229	NA	Agilent eArray	1700038P13Rik	RIKEN cDNA 1700038P13 gene	NA	TGGATAACCCGTTCCCAGCGTTGTGTTATTGTCTCATTTACAAATAAAGAGATTCAGAGA	1700038P13Rik	RIKEN cDNA 1700038P13 gene	chr17:80115713-80115772	AK076360	73265	1700038P13RIK	8.01715	8.08961	9.6877	5.9719	6.63867	6.08363
A_51_P256066	-2.36387	11.1928	-6.33219	0.000850823	0.0186959	-0.363528	ENSMUSG00000023800	Gencode.M18_pc	Tiam2	T cell lymphoma invasion and metastasis 2 [Source:MGI Symbol;Acc:MGI:1344338]	protein_coding	GATTTAGTTGGTCAGAATCTGTAAAGTACTAGCACCTATCCCTTTGGAGCAGCAATCAAA	Tiam2	T cell lymphoma invasion and metastasis 2	chr17:3518885-3518944	NM_011878	24001	TIAM2	12.5519	12.8927	11.6797	9.5036	10.2952	10.2338
A_55_P2040830	-2.36363	7.68171	-15.4737	6.54208e-06	0.00170499	4.79761	ENSMUSG00000093939	Gencode.M18_pc	Trav4d-3	T cell receptor alpha variable 4D-3 [Source:MGI Symbol;Acc:MGI:3782037]	TR_V_gene	AATGGGAGGTTAAAGTCAGCATTTGATTCTAAGGAGAGCTACAGCACCCTGCACATTAGG	NA	NA	chr14:53520040-53520099	AF479022	NA	TRAV4D-3	8.80601	9.11943	8.66515	6.36174	6.69467	6.44328
A_55_P2010567	-2.36119	9.45912	-4.65277	0.00388429	0.042653	-2.05215	NA	Agilent eArray	Gm38958	predicted gene, 38958	NA	GAGTTGGAGAACCGACACTTGAGCACTGTGGTGCAAATAAAACCCGCTTTCTCCCAAGTT	Gm38958	predicted gene, 38958	chr11:95685325-95685269	XM_011249375	105242869	GM38958	10.3671	11.7372	9.81486	7.88638	8.50452	8.44467
A_52_P605556	-2.35011	7.98168	-4.53427	0.00438232	0.0459357	-2.18611	ENSMUSG00000021396	Gencode.M18_pc	Nxnl2	nucleoredoxin-like 2 [Source:MGI Symbol;Acc:MGI:1922374]	protein_coding	ATGCAAGATGCTCTTTCCTACAGGAAATTTCTTTGATAAATTGACCTATGGAGGTGATAC	Nxnl2	nucleoredoxin-like 2	chr13:51270403-51270462	NM_029173	75124	NXNL2	8.4995	10.3483	8.62236	7.04073	6.50552	6.87363
A_52_P160005	-2.34923	7.81211	-5.20552	0.0022691	0.0316126	-1.45439	ENSMUSG00000035246	Gencode.M18_pc	Pcyt1b	phosphate cytidylyltransferase 1, choline, beta isoform [Source:MGI Symbol;Acc:MGI:2147987]	protein_coding	CCATGTCTGCCACAAATTGTCAGGATAACCCAGAGACAAAGATAAACCAGGCTTGTGACA	Pcyt1b	phosphate cytidylyltransferase 1, choline, beta isoform	chrX:90994629-90994688	NM_211138	236899	PCYT1B	9.30181	9.6599	7.99845	6.64973	6.31767	6.94508
A_51_P194306	-2.34761	10.0993	-10.1593	6.83508e-05	0.00525069	2.39357	ENSMUSG00000032352	Gencode.M18_pc	Lrrc1	leucine rich repeat containing 1 [Source:MGI Symbol;Acc:MGI:2442313]	protein_coding	CAGTGGATCCATGACTTACGTGTCACAGAAGAATGACTGTTGCCGAAGGAAGCTTAAAAA	Lrrc1	leucine rich repeat containing 1	chr9:77278998-77278939	NM_172528	214345	LRRC1	11.4543	11.5048	10.8601	9.16682	8.60028	9.00932
A_55_P2082703	-2.34469	7.60002	-7.6612	0.000314559	0.0111369	0.736561	ENSMUSG00000058976	Gencode.M18_pc	Usp17lc	ubiquitin specific peptidase 17-like C [Source:MGI Symbol;Acc:MGI:107698]	protein_coding	CACACTGTAGAGATAGATGTTCTTATTCTTTGTGTGTGATCAACAGTTCTTTGACCAAAT	NA	NA	chr7:111802099-111802158	AK155468	NA	USP17LC	9.26788	8.57036	8.47885	6.04288	6.31894	6.92119
A_55_P2305010	-2.34221	9.15966	-5.09589	0.00251636	0.033477	-1.56947	ENSMUSG00000103529	Gencode M18	A730089K16Rik	RIKEN cDNA A730089K16 gene [Source:MGI Symbol;Acc:MGI:2443970]	TEC	GACAGGTGACAGAATATCTTTCTTCCGACTTCTCAAGCGTACTGGTCCATAGTTCATACC	A730089K16Rik	RIKEN cDNA A730089K16 gene	chr5:77085013-77084954	XR_880407	320411	A730089K16RIK	10.0224	11.3067	9.66327	7.91441	7.64452	8.40673
A_55_P2045367	-2.34004	7.68744	-10.0976	7.06763e-05	0.00530251	2.35783	NA	Agilent eArray	G630025P09Rik	RIKEN cDNA G630025P09 gene	NA	AAATGACTATTGCCTTCGGTTTTTTCTAAGCAGGTTGCCCCACGGTAAATCGGTTCACCT	G630025P09Rik	RIKEN cDNA G630025P09 gene	chr11:69618896-69618955	NR_027913	74341	G630025P09RIK	8.51709	9.22246	8.83284	6.58578	6.77823	6.18824
A_51_P227165	-2.33523	7.08739	-4.7072	0.0036773	0.0414223	-1.99131	ENSMUSG00000032062	Gencode.M18_pc	2310030G06Rik	RIKEN cDNA 2310030G06 gene [Source:MGI Symbol;Acc:MGI:1914202]	protein_coding	CTCCAGACCTTATCACAGAGATGGGACTCCAACTGTTGAGCCTCAAAGACTTCAATTTGT	2310030G06Rik	RIKEN cDNA 2310030G06 gene	chr9:50547964-50547905	NM_025865	66952	2310030G06RIK	8.02859	9.08094	7.6555	5.26216	5.82948	6.6677
A_52_P663413	-2.33412	10.1642	-8.49489	0.000181014	0.0084394	1.34186	ENSMUSG00000018906	Gencode.M18_pc	P4ha2	procollagen-proline, 2-oxoglutarate 4-dioxygenase (proline 4-hydroxylase), alpha II polypeptide [Source:MGI Symbol;Acc:MGI:894286]	protein_coding	CAGATATTTCAGGTAGAAGATGTCTCAGTGAAACCAAAGTTCTGATGCTGTTTACATGTG	P4ha2	procollagen-proline, 2-oxoglutarate 4-dioxygenase (proline 4-hydroxylase), alpha II polypeptide	chr11:53945032-53945091	NM_011031	18452	P4HA2	11.4827	11.0634	11.4477	8.83406	9.56388	8.59347
A_55_P1982563	-2.33311	7.65622	-12.3067	2.36416e-05	0.00319567	3.50916	ENSMUSG00000020282	Gencode.M18_pc	Rhbdf1	rhomboid 5 homolog 1 [Source:MGI Symbol;Acc:MGI:104328]	protein_coding	CCGACAACCACCTCATGTGGTCAATAAATGGACTGGGAGCGTTTTAGCTGCCACTAACTC	Rhbdf1	rhomboid 5 homolog 1	chr11:32109646-32109587	NM_010117	13650	RHBDF1	8.47233	9.07316	8.92285	6.29142	6.48197	6.6956
A_55_P2016376	-2.33225	12.6229	-13.2046	1.59514e-05	0.00261473	3.91194	ENSMUSG00000021596	Gencode.M18_pc	Mctp1	multiple C2 domains, transmembrane 1 [Source:MGI Symbol;Acc:MGI:1926021]	protein_coding	CCTCAGATATACCTAGTGGATGCAACCATTAACAGATGACTGATTTTGTTTATTTCATTG	Mctp1	multiple C2 domains, transmembrane 1	chr13:77170944-77171003	NM_030174	78771	MCTP1	13.9125	13.8709	13.5835	11.1368	11.5204	11.713
A_51_P351896	-2.33155	12.0901	-8.49048	0.000181521	0.00845216	1.33881	ENSMUSG00000027955	Gencode.M18_pc	Fam198b	family with sequence similarity 198, member B [Source:MGI Symbol;Acc:MGI:1915909]	protein_coding	ATATATTATGTAGATCAGCTCAATACAAGAAGTCCTAATGAAAGCCAACACTCATGACTG	Fam198b	family with sequence similarity 198, member B	chr3:79746782-79746841	NM_133187	68659	FAM198B	12.9442	13.7087	13.1146	10.5976	11.3484	10.8269
A_51_P270733	-2.32964	11.3577	-6.56627	0.000705844	0.0169146	-0.156271	ENSMUSG00000022415	Gencode.M18_pc	Syngr1	synaptogyrin 1 [Source:MGI Symbol;Acc:MGI:1328323]	protein_coding	ATGTGTACTTCCCGCAGATCAGCAGTGTCAAGGACCGCAAGAAGGCCGTGCTCTCTGACA	Syngr1	synaptogyrin 1	chr15:79941040-79941099	NM_009303	20972	SYNGR1	12.3909	13.2835	11.8931	10.1748	10.0271	10.3767
A_52_P278295	-2.32888	8.9297	-7.48134	0.000356763	0.0119868	0.597988	ENSMUSG00000028073	Gencode.M18_pc	Pear1	platelet endothelial aggregation receptor 1 [Source:MGI Symbol;Acc:MGI:1920432]	protein_coding	TCAGGGTCACATGCACAGCTCAAGCTGCACTCCGATGTGCTTTCCCCTGTTGCTAGATTA	Pear1	platelet endothelial aggregation receptor 1	chr3:87553208-87553149	NM_028460	73182	PEAR1	10.2887	10.5473	9.44634	7.59619	7.62827	8.07131
A_55_P1980262	-2.3258	11.3831	-6.26159	0.000901095	0.019168	-0.427265	ENSMUSG00000067924	Agilent eArray	Cxx1b	CAAX box 1B	protein_coding	TCTGTTCTACCTGTACAGAAGCCTTTTCCTCACGTTGAATAAACATCAGATGCTAAAAAA	Cxx1b	CAAX box 1B	chrX:50972408-50972349	NM_001018063	553127	CXX1B	12.7303	13.1707	11.737	10.0579	10.1591	10.4436
A_55_P2152009	-2.31279	14.5416	-5.81341	0.00131315	0.0232959	-0.845801	ENSMUSG00000029359	Gencode.M18_pc	Tesc	tescalcin [Source:MGI Symbol;Acc:MGI:1930803]	protein_coding	GTGGTGTGTGGGACTCCGATATTTTTATCTCTAATGGTGACAATAAAGGTTTCCTAATGA	Tesc	tescalcin	chr5:118511820-118511879	NM_021344	57816	TESC	15.7173	16.3016	15.075	13.0311	13.1188	14.0056
A_55_P2133266	-2.30863	11.3936	-6.00347	0.00111641	0.0213646	-0.665328	ENSMUSG00000067925	Gencode.M18_pc	Rtl8a	retrotransposon Gag like 8A [Source:MGI Symbol;Acc:MGI:1913408]	protein_coding	CCTGTACAGAAGCCTTTTCCTCACGTTGAATAAACATCAGATGCTATTTAAAAGGAAAAA	Cxx1c	CAAX box 1C	chrX:50912255-50912314	NM_028375	72865	RTL8A	12.7795	13.1616	11.7026	10.0636	10.1641	10.4902
A_55_P2114118	-2.30546	6.52868	-7.86474	0.000273601	0.0102629	0.889833	ENSMUSG00000032076	Gencode.M18_pc	Cadm1	cell adhesion molecule 1 [Source:MGI Symbol;Acc:MGI:1889272]	protein_coding	ATAATCAATGCAGAAGGAGGACAGAACAACTCCGAAGAAAAGAAAGAGTACTTCATCTAG	Cadm1	cell adhesion molecule 1	chr9:47658414-47658473	NM_207675	54725	CADM1	8.35241	7.37081	7.32102	5.22967	5.43451	5.46367
A_55_P2171378	-2.30276	8.11969	-7.86452	0.000273641	0.0102629	0.889672	ENSMUSG00000028716	Gencode.M18_pc	Pdzk1ip1	PDZK1 interacting protein 1 [Source:MGI Symbol;Acc:MGI:1914432]	protein_coding	TGTGAAATAAAGACTTTTTATACTTCTGGGATGGAGACTCTGACCCAGCTTCCAGGCTCT	Pdzk1ip1	PDZK1 interacting protein 1	chr4:114766439-114766498	NM_001164557	67182	PDZK1IP1	9.08904	9.86459	8.85957	6.76621	6.85555	7.28315
A_52_P372151	-2.30033	10.3814	-8.03658	0.000243781	0.009726	1.0164	ENSMUSG00000038816	Gencode.M18_pc	Ctnnal1	catenin (cadherin associated protein), alpha-like 1 [Source:MGI Symbol;Acc:MGI:1859649]	protein_coding	CTGTAAAAGACCATCAAATATGTGGCAACAATACCATTATCTCTGACGACAAAATAGGGT	Ctnnal1	catenin (cadherin associated protein), alpha-like 1	chr4:56823933-56823874	NM_018761	54366	CTNNAL1	11.2499	12.1091	11.2357	9.10706	9.01854	9.56812
A_52_P488437	-2.29592	7.29735	-7.12207	0.000462354	0.0135731	0.311991	ENSMUSG00000021118	Gencode.M18_pc	Plek2	pleckstrin 2 [Source:MGI Symbol;Acc:MGI:1351466]	protein_coding	TAAAGGGAATGTCCAAGGAAATCTCTTCAAAGTGATTACGAAGGATGACACACACTATTA	Plek2	pleckstrin 2	chr12:79990290-79990231	NM_013738	27260	PLEK2	8.05842	8.84909	8.42842	5.6658	6.07439	6.70799
A_52_P574945	-2.29462	8.98955	-5.41527	0.00186951	0.0281484	-1.23883	ENSMUSG00000097383	Gencode M18	1500026H17Rik	RIKEN cDNA 1500026H17 gene [Source:MGI Symbol;Acc:MGI:1916252]	bidirectional_promoter_lncRNA	CAAACAGTCACATCTCCTTAAATGGATCCACTTTCCGATCTTTGAAAATACTTTAGAGCC	1500026H17Rik	RIKEN cDNA 1500026H17 gene	chr10:89151917-89151976	NR_130956	69002	1500026H17RIK	9.95059	10.8628	9.59715	7.18242	8.09561	8.2487
A_52_P469502	-2.2946	10.2946	-4.58058	0.00417952	0.0447414	-2.13351	ENSMUSG00000028755	Gencode.M18_pc	Cda	cytidine deaminase [Source:MGI Symbol;Acc:MGI:1919519]	protein_coding	TGAAGGTTGAAGAATAGAATGTCTGCTGAATGTGCAAGCCCTACCTAAGGAACGGCTCTT	Cda	cytidine deaminase	chr4:137894801-137894742	NM_028176	72269	CDA	11.3538	12.2322	10.7397	8.70313	8.77218	9.96652
A_52_P290783	-2.29165	6.76593	-6.31193	0.000864909	0.0187843	-0.381756	ENSMUSG00000033187	Gencode.M18_pc	BC016579	cDNA sequence, BC016579 [Source:MGI Symbol;Acc:MGI:2384848]	protein_coding	TCTGGGAGAGTTAGTCTCATTGTTGTATAATGAGAAATTCCCTAGTCTGATACCTCAGAT	BC016579	cDNA sequence, BC016579	chr16:45627360-45627301	NM_145389	212998	BC016579	7.65533	8.56445	7.51549	5.24563	5.45636	6.15831
A_51_P342877	-2.28972	7.85366	-12.1676	2.51875e-05	0.00323561	3.44372	ENSMUSG00000019194	Gencode.M18_pc	Scn1b	sodium channel, voltage-gated, type I, beta [Source:MGI Symbol;Acc:MGI:98247]	protein_coding	TACCTGGCCATTACATCCGAGAGCAAAGAAAACTGTACAGGCGTCCAGGTGGCTGAATAG	Scn1b	sodium channel, voltage-gated, type I, beta	chr7:31902307-31902248	NM_011322	20266	SCN1B	9.08217	8.63638	9.27702	6.58403	6.64145	6.90092
A_55_P2035772	-2.28688	7.82958	-8.10774	0.00023255	0.00945493	1.06807	ENSMUSG00000022683	Gencode.M18_pc	Pla2g10	phospholipase A2, group X [Source:MGI Symbol;Acc:MGI:1347522]	protein_coding	GGCTTGGCTGTGGTAATAACATTGCCACATGATACATCTAAGAATTGTAACTGTAATAAA	Pla2g10	phospholipase A2, group X	chr16:13715228-13715169	NM_001291009	26565	PLA2G10	8.61579	9.51684	8.78642	6.60806	6.41961	7.03075
A_51_P219166	-2.28215	8.3036	-6.65704	0.000657453	0.0164028	-0.0775471	ENSMUSG00000031647	Gencode.M18_pc	Mfap3l	microfibrillar-associated protein 3-like [Source:MGI Symbol;Acc:MGI:1918556]	protein_coding	AGAAACACCTGCATTATTTATGAAAGCCATGTCTAATCTTAACTCCGAAAAGCTATGCAT	Mfap3l	microfibrillar-associated protein 3-like	chr8:63150717-63150776	NM_027756	71306	MFAP3L	9.44339	10.048	8.84268	6.8371	7.10522	7.54526
A_52_P156452	-2.28145	8.66252	-5.38146	0.00192811	0.0286378	-1.27317	ENSMUSG00000016756	Gencode.M18_pc	Cmah	cytidine monophospho-N-acetylneuraminic acid hydroxylase [Source:MGI Symbol;Acc:MGI:103227]	protein_coding	CAGGACAATGTTTTCAGCTTTTCAGAGAGCTCTTGGCACCATCTACTTCCCATCTCACTA	Cmah	cytidine monophospho-N-acetylneuraminic acid hydroxylase	chr13:24562356-24562415	NM_007717	12763	CMAH	9.68116	10.6895	9.03901	7.4104	7.33634	7.81863
A_55_P2043182	-2.27812	9.97262	-6.15883	0.000980518	0.0200171	-0.521089	ENSMUSG00000047867	Gencode.M18_pc	Gimap6	GTPase, IMAP family member 6 [Source:MGI Symbol;Acc:MGI:1918876]	protein_coding	AACAAGTCTTGCAACAGATAGGCAGGACACAGCAGAGATCCTGAGGAGTCAAATATGAGA	Gimap6	GTPase, IMAP family member 6	chr6:48651725-48651666	NM_153175	231931	GIMAP6	11.509	11.5386	10.2874	9.12599	8.66586	8.70883
A_52_P517247	-2.2774	6.11105	-7.41917	0.000372853	0.0122542	0.549387	ENSMUSG00000040797	Gencode.M18_pc	Iqsec3	IQ motif and Sec7 domain 3 [Source:MGI Symbol;Acc:MGI:2677208]	protein_coding	TAGCCCAGAGGTATTTTATCTGTTCAATTCCTAGAGTTTTAGAGATTCTATTGAACTGTG	Iqsec3	IQ motif and Sec7 domain 3	chr6:121323017-121322958	NM_001033354	243621	IQSEC3	7.02966	7.91718	6.80242	4.77564	5.19056	4.95086
A_55_P2023484	-2.27132	11.1039	-8.84972	0.000145118	0.00755285	1.58242	ENSMUSG00000037606	Gencode.M18_pc	Osbpl5	oxysterol binding protein-like 5 [Source:MGI Symbol;Acc:MGI:1930265]	protein_coding	CCTTCCCCAATCCTGGGGGTATGTCTGCTCCATGCCTTGAAATAAATGGAAATACATGTA	Osbpl5	oxysterol binding protein-like 5	chr7:150874726-150874667	NM_024289	79196	OSBPL5	12.321	12.6319	11.7658	10.1242	9.65118	10.1293
A_51_P267370	-2.263	14.1467	-15.3374	6.87672e-06	0.00170771	4.74913	ENSMUSG00000026223	Gencode.M18_pc	Itm2c	integral membrane protein 2C [Source:MGI Symbol;Acc:MGI:1927594]	protein_coding	GGATAGGGAAATGTGTCCTGGGTTGGACCCATCAGAGCACAAGAGAAGGTGGCTATCCTG	Itm2c	integral membrane protein 2C	chr1:87804673-87804732	NM_022417	64294	ITM2C	15.523	15.0001	15.3117	12.9434	12.9851	13.1172
A_51_P302520	-2.25913	7.90758	-7.17718	0.000444018	0.0132278	0.356683	ENSMUSG00000024049	Gencode.M18_pc	Myom1	myomesin 1 [Source:MGI Symbol;Acc:MGI:1341430]	protein_coding	AAGTCATCAGATCTCTTATTCCTATAGATGAGGAGGCACCATTGAAGAACACATTAAGGG	Myom1	myomesin 1	chr17:71475839-71475898	NM_010867	17929	MYOM1	9.12946	9.5465	8.43547	6.52761	6.68113	7.1253
A_51_P180974	-2.25331	7.50554	-5.04566	0.00263983	0.0344097	-1.62276	ENSMUSG00000037060	Gencode.M18_pc	Cavin3	caveolae associated 3 [Source:MGI Symbol;Acc:MGI:1923422]	protein_coding	TACTTATAGAGTGCAGCACTTACATCCAAATAAGGAGAGAATCCTGCATCCACTGCCCAG	Cavin3	caveolae associated 3	chr7:112629283-112629224	NM_028444	109042	CAVIN3	8.68445	9.46584	7.74629	6.67426	6.42644	6.03595
A_52_P56682	-2.25129	10.9148	-9.17714	0.000119155	0.00675512	1.7961	ENSMUSG00000027636	Gencode.M18_pc	Sla2	Src-like-adaptor 2 [Source:MGI Symbol;Acc:MGI:1925049]	protein_coding	CAAAGATACACCTCCACCTGTGACTGTGCCAACATCATCACTAAATTGGAAAAAGCTGGA	Sla2	Src-like-adaptor 2	chr2:156700675-156700616	NM_029983	77799	SLA2	12.1685	12.4115	11.5413	9.66287	9.67963	10.0249
A_51_P324651	-2.2497	7.08596	-4.53968	0.00435805	0.0457741	-2.17995	ENSMUSG00000013033	Gencode.M18_pc	Adgrl1	adhesion G protein-coupled receptor L1 [Source:MGI Symbol;Acc:MGI:1929461]	protein_coding	TGTAGTAGGGCCCATGGTTTCTGCCTAGCTGGAATCACTAGCACAGGGAGCAACTTGCTT	Adgrl1	adhesion G protein-coupled receptor L1	chr8:86465269-86465328	NM_181039	330814	ADGRL1	8.29951	9.14837	7.18456	6.11813	5.6468	6.1184
A_55_P1987984	-2.24744	8.37109	-9.044	0.000129001	0.00707746	1.71014	ENSMUSG00000049577	Agilent eArray	Zfpm1	zinc finger protein, multitype 1	protein_coding	TAGAGAGAGTGAAACCTTGTTCTTGCTGAGTCTTCGAGAAAGAGGACCAAGTCCCAAAGT	Zfpm1	zinc finger protein, multitype 1	chr8:124861353-124861412	NM_009569	22761	ZFPM1	9.52061	9.85792	9.1059	7.10579	7.01285	7.62347
A_55_P2172999	-2.24471	7.25656	-5.25419	0.00216831	0.0308278	-1.40383	ENSMUSG00000034573	Gencode.M18_pc	Ptpn13	protein tyrosine phosphatase, non-receptor type 13 [Source:MGI Symbol;Acc:MGI:103293]	protein_coding	TGTCTTCTGCTATCAAGTCATCCTCTATGTCCTGACTCATCTTCAGGCTGAAGAGCAGAA	Ptpn13	protein tyrosine phosphatase, non-receptor type 13	chr5:104026720-104026779	NM_011204	19249	PTPN13	7.72673	9.35796	8.05206	6.04119	6.03965	6.32178
A_51_P150302	-2.24003	7.49402	-4.4495	0.00478311	0.0484118	-2.28322	ENSMUSG00000032021	Gencode.M18_pc	Crtam	cytotoxic and regulatory T cell molecule [Source:MGI Symbol;Acc:MGI:1859822]	protein_coding	TGACAAGAGGCTTCCTGACTAACCATGAGCCAACCTGACAGGCCACTTTTATCCTAATTA	Crtam	cytotoxic and regulatory T cell molecule	chr9:40781069-40781010	NM_019465	54698	CRTAM	8.59068	9.56788	7.68357	5.98063	6.29874	6.84266
A_55_P2046852	-2.23572	14.2242	-6.25566	0.000905472	0.0192047	-0.432647	ENSMUSG00000031162	Gencode.M18_pc	Gata1	GATA binding protein 1 [Source:MGI Symbol;Acc:MGI:95661]	protein_coding	AATAAAACCACCTGGAGACATGCGCTGGTATTTGGTTAAATAAATGTCAGTGTCAAGTGG	Gata1	GATA binding protein 1	chrX:7536451-7536392	NM_008089	14460	GATA1	15.4603	15.6557	14.91	13.3574	12.3991	13.5623
A_52_P217710	-2.2333	8.21633	-7.41195	0.000374775	0.0122542	0.543721	ENSMUSG00000022297	Gencode.M18_pc	Fzd6	frizzled class receptor 6 [Source:MGI Symbol;Acc:MGI:108474]	protein_coding	GGCCGAGCTGTCGATTCCCCTTTTAAGTGTTGAATTAGGATTGAATTATGGCCATTTGTA	Fzd6	frizzled class receptor 6	chr15:38869107-38869166	NM_008056	14368	FZD6	8.68386	9.71948	9.5956	7.08235	7.34384	6.87285
A_55_P2048378	-2.23254	9.62353	-5.16672	0.0023533	0.0322919	-1.49493	ENSMUSG00000114196	Gencode M18	Gm47547	predicted gene, 47547 [Source:MGI Symbol;Acc:MGI:6096561]	antisense	TAAAGGGCTGCAATATATGTGCCGCCACTAGATAGTGCTAAACCTCTTTGTGCACAGCTT	Zfp975	zinc finger protein 975	chr7:49915747-49915689	NM_001008427	434179	GM47547	10.6899	11.6399	9.8896	8.38587	8.46292	8.67298
A_52_P274496	-2.23032	8.54145	-6.83059	0.000575203	0.0153103	0.0704813	ENSMUSG00000027217	Gencode.M18_pc	Tspan18	tetraspanin 18 [Source:MGI Symbol;Acc:MGI:1917186]	protein_coding	TTGGAATTTGTAAATGTCCCTTGCAGTAGGAAACAGAGCTAATTTATCATTGTATCTCCC	Tspan18	tetraspanin 18	chr2:93042040-93041981	NM_183180	241556	TSPAN18	9.3569	10.0694	9.54348	6.97703	8.04588	7.25596
A_55_P2011573	-2.22931	10.4347	-4.75257	0.00351436	0.0404169	-1.94095	ENSMUSG00000050147	Gencode.M18_pc	F2rl3	coagulation factor II (thrombin) receptor-like 3 [Source:MGI Symbol;Acc:MGI:1298207]	protein_coding	TACTACTATGTGTCCCGTGAGTTCAGGGAGAAGGTACGCGCTATGTTGTGTCGCCAGCCG	F2rl3	coagulation factor II (thrombin) receptor-like 3	chr8:75287099-75287158	NM_007975	14065	F2RL3	11.6855	12.4125	10.5501	9.3302	9.08559	9.54434
A_51_P440210	-2.22873	7.43308	-5.13846	0.00241685	0.0326934	-1.52458	ENSMUSG00000052920	Gencode.M18_pc	Prkg1	protein kinase, cGMP-dependent, type I [Source:MGI Symbol;Acc:MGI:108174]	protein_coding	CATGATGCCTTTGATCGATGCTGCTCCAGTAACTACAGTGGCATTAGGACTTATCGCTTA	Prkg1	protein kinase, cGMP-dependent, type I	chr19:30643622-30643563	NM_011160	19091	PRKG1	8.02657	9.52833	8.08745	6.32866	6.04289	6.5846
A_55_P2102095	-2.22491	7.98231	-10.9934	4.42421e-05	0.00428111	2.8552	ENSMUSG00000078607	Gencode.M18_pc	1810010H24Rik	RIKEN cDNA 1810010H24 gene [Source:MGI Symbol;Acc:MGI:1916316]	protein_coding	TAGCTGTCACTTTATCTACAAAATGCTGACAGGTGTGCTTCAGGACACTGTGCGAAAGTC	1810010H24Rik	RIKEN cDNA 1810010H24 gene	chr11:106891169-106891228	NM_001163473	69066	1810010H24RIK	8.91328	9.31315	9.05786	6.78093	6.57758	7.25106
A_55_P1978681	-2.22465	9.62438	-7.19895	0.000437008	0.0131378	0.374255	ENSMUSG00000034127	Gencode.M18_pc	Tspan8	tetraspanin 8 [Source:MGI Symbol;Acc:MGI:2384918]	protein_coding	GCAGTCTACAGATATCTTCACAGGTATTCACTGTATTTAACTGTGAAGGACATAATACAA	Tspan8	tetraspanin 8	chr10:115286563-115286622	NM_146010	216350	TSPAN8	11.0142	10.8955	10.3004	8.00207	8.53349	9.00059
A_52_P349844	-2.22243	6.83385	-4.85868	0.00316433	0.0380647	-1.82432	ENSMUSG00000061462	Gencode.M18_pc	Obscn	obscurin, cytoskeletal calmodulin and titin-interacting RhoGEF [Source:MGI Symbol;Acc:MGI:2681862]	protein_coding	ACCCTCTTTGGCAGAGAGGGAATCCTACTCAGAGTCTGATGTGAAGGACTACCTGTGGCA	Obscn	obscurin, cytoskeletal calmodulin and titin-interacting RhoGEF	chr11:58809307-58809022	NM_001171512	380698	OBSCN	7.93285	8.7519	7.15045	5.36895	5.50961	6.28937
A_55_P2161450	-2.21788	10.2617	-8.02571	0.000245552	0.00976441	1.00847	ENSMUSG00000066364	Gencode.M18_pc	Serpina3b	serine (or cysteine) peptidase inhibitor, clade A, member 3B [Source:MGI Symbol;Acc:MGI:2182835]	protein_coding	ACCTCCACCTCCATCACCCAAAATGAAAGGGAGGAGCAAATGATCAATAAACGTATCCCT	Serpina3b	serine (or cysteine) peptidase inhibitor, clade A, member 3B	chr12:105377694-105377753	NM_173024	271047	SERPINA3B	11.3783	11.8811	10.8526	9.02767	9.02295	9.40772
A_55_P2048388	-2.21694	7.61776	-6.08265	0.00104462	0.0206626	-0.59145	ENSMUSG00000073538	Gencode M18	E330020D12Rik	Riken cDNA E330020D12 gene [Source:MGI Symbol;Acc:MGI:3761270]	processed_transcript	TACACACCAAGGTACAGGACTGGCTCCTGGGTGACAGAACCAGGTCTGCAACTAGGGGAA	E330020D12Rik	Riken cDNA E330020D12 gene	chr1:155255670-155255611	NR_033736	626058	E330020D12RIK	8.57693	9.47067	8.13109	6.43282	6.25181	6.84323
A_55_P2029217	-2.21607	6.88071	-15.247	7.10985e-06	0.00172506	4.71665	ENSMUSG00000076762	Gencode.M18_pc	Trav6-1	T cell receptor alpha variable 6-1 [Source:MGI Symbol;Acc:MGI:3644497]	TR_V_gene	ATATCCTGGAGAAGGTCCACAGCTCCTTTTGAAAGTCACAACAGCCAACAATAAGGGAAG	NA	NA	chr14:53287372-53287431	U21455	NA	TRAV6-1	7.94699	8.26367	7.75557	5.82793	5.66434	5.82574
A_55_P1989076	-2.21481	10.4479	-5.66965	0.00148865	0.024783	-0.985339	ENSMUSG00000038267	Gencode.M18_pc	Slc22a23	solute carrier family 22, member 23 [Source:MGI Symbol;Acc:MGI:1920352]	protein_coding	CTGTGATTCTGGGAGGAAAGACTGATAACACAAAACTCTCTTCTCTAATGTAGTATTTTT	Slc22a23	solute carrier family 22, member 23	chr13:34271140-34271081	NM_001033167	73102	SLC22A23	11.0917	12.3533	11.221	9.2227	9.01162	9.78722
A_55_P2000783	-2.21323	7.0838	-9.95279	7.65058e-05	0.00546647	2.27305	ENSMUSG00000000142	Gencode.M18_pc	Axin2	axin 2 [Source:MGI Symbol;Acc:MGI:1270862]	protein_coding	CTTGGTACAATAATTATTGTAATTAAGAGATGTAGCCTTTATTAAAATTTTATATTTTTC	Axin2	axin 2	chr11:108812034-108812093	NM_015732	12006	AXIN2	7.87433	8.64974	8.04718	6.07305	5.77306	6.08545
A_55_P2052690	-2.21135	7.39593	-6.61189	0.000681024	0.0166021	-0.116587	ENSMUSG00000030554	Gencode.M18_pc	Synm	synemin, intermediate filament protein [Source:MGI Symbol;Acc:MGI:2661187]	protein_coding	GTTACTACGGCTGTGGCTCGTCATCTCTTATACTGTCAGAGATGTGCGGACTTATTTTTT	Synm	synemin, intermediate filament protein	chr7:74876259-74876200	NM_201639	233335	SYNM	8.39832	9.19831	7.90817	6.18871	6.15477	6.52727
A_55_P2017929	-2.20758	14.0281	-7.1483	0.000453521	0.0134226	0.333298	ENSMUSG00000022037	Gencode.M18_pc	Clu	clusterin [Source:MGI Symbol;Acc:MGI:88423]	protein_coding	CTCGGGAAGAACTGATTCCCCCACGCAACTAATCCAATAAAAGCCGCCTTGCGATACGTG	Clu	clusterin	chr14:66600325-66600384	NM_013492	12759	CLU	15.0412	15.6256	14.7288	12.5457	12.8297	13.3975
A_55_P2031466	-2.20681	11.5735	-6.14123	0.000994912	0.0202325	-0.537279	ENSMUSG00000090958	Gencode.M18_pc	Lrrc32	leucine rich repeat containing 32 [Source:MGI Symbol;Acc:MGI:93882]	protein_coding	CCCTGGGACCCGCTCTTTGTATAACTCACATGAATGTATTAAAGTATAATTTTGGAGAAA	Lrrc32	leucine rich repeat containing 32	chr7:105650282-105650341	NM_001113379	434215	LRRC32	12.511	13.303	12.2168	9.95603	10.562	10.8924
A_55_P2214531	-2.20408	7.39908	-8.47278	0.000183573	0.00847534	1.32655	ENSMUSG00000020279	Agilent eArray	Il9r	interleukin 9 receptor	protein_coding	GACACAGTCTCCGCGTATCTCTGCTAGGTGCATCATGTCTGTTTTGGGGAGATGAACGAA	Il9r	interleukin 9 receptor	chr11:32090558-32090499	NM_001134458	16199	IL9R	9.10211	8.16164	8.23961	6.23762	6.35188	6.30161
A_51_P373669	-2.20385	7.52567	-5.14057	0.00241204	0.0326769	-1.52236	ENSMUSG00000005611	Gencode.M18_pc	Mrvi1	MRV integration site 1 [Source:MGI Symbol;Acc:MGI:1338023]	protein_coding	TCCATAACGTCCTCAGCAAACATCTGGTACCACTGCGAACACCGGGAGACCTATCAGAAA	Mrvi1	MRV integration site 1	chr7:118043196-118042501	NM_194464	17540	MRVI1	9.27566	8.92636	7.68076	6.24477	6.28879	6.73768
A_55_P1972648	-2.20036	9.89773	-9.88324	7.95035e-05	0.00552801	2.23187	ENSMUSG00000049687	Gencode.M18_pc	Pheta2	PH domain containing endocytic trafficking adaptor 2 [Source:MGI Symbol;Acc:MGI:2443609]	protein_coding	AATGAAGAATCAGGAGCCTGAGTTGCAAAGCTGGTGTCTGAGGCTAACAATTGAGTCCAA	Fam109b	family with sequence similarity 109, member B	chr15:82175794-82175853	NM_177391	338368	PHETA2	11.0497	11.2918	10.6522	8.90469	8.45314	9.03482
A_55_P2039215	-2.19984	7.39694	-6.16305	0.000977103	0.0199867	-0.517212	ENSMUSG00000060923	Gencode.M18_pc	Acyp2	acylphosphatase 2, muscle type [Source:MGI Symbol;Acc:MGI:1922822]	protein_coding	ACTCACCTATGTTTTAGCAAGCAGAAACTAAATATTATAAAATAAAATGTCATTATAAAT	Acyp2	acylphosphatase 2, muscle type	chr11:30406185-30406126	NM_029344	75572	ACYP2	8.29513	9.19403	8.00143	6.03138	6.12214	6.73755
A_55_P2038183	-2.19897	6.14606	-9.41997	0.000103361	0.00623369	1.94971	ENSMUSG00000048782	Gencode.M18_pc	Insc	INSC spindle orientation adaptor protein [Source:MGI Symbol;Acc:MGI:1917942]	protein_coding	CCAACTTTGAACCAGGGCATTTTAACTGCCCAGCATTTTTTAAAAGTTAGTTTTACTCTT	Insc	inscuteable homolog (Drosophila)	chr7:121993749-121993808	NM_173767	233752	INSC	7.66619	6.93396	7.13648	5.05067	4.76921	5.31984
A_51_P248857	-2.1988	10.6686	-7.05453	0.000486034	0.0139296	0.256802	ENSMUSG00000042106	Gencode.M18_pc	Inka1	inka box actin regulator 1 [Source:MGI Symbol;Acc:MGI:1915426]	protein_coding	AACAGGGGCCGCAGTCGGCAGCCCCTGGTGCTAGGGGATAACTGTTTTGCTGATTTAGTT	Fam212a	family with sequence similarity 212, member A	chr9:107886930-107886871	NM_026597	68176	INKA1	11.5525	12.4736	11.2779	9.53546	9.48651	9.68556
A_65_P05872	-2.19704	6.6867	-6.71032	0.000630837	0.0160033	-0.0317585	ENSMUSG00000072812	Gencode.M18_pc	Ahnak2	AHNAK nucleoprotein 2 [Source:MGI Symbol;Acc:MGI:2144831]	protein_coding	TCTGGGAGGATTCTGTATTGACTGTTACATTTCCCAAACTGAAGGTACCCAGGTTCTCCT	NA	NA	chr12:114012303-114012244	XM_017315330	NA	AHNAK2	8.47576	7.66917	7.21074	5.41938	5.79457	5.55061
A_55_P2002129	-2.1956	7.75302	-4.51291	0.0044796	0.0465647	-2.21048	ENSMUSG00000029101	Gencode.M18_pc	Rgs12	regulator of G-protein signaling 12 [Source:MGI Symbol;Acc:MGI:1918979]	protein_coding	TGTCTCCATGGTGCAAGAGGGCACTACACAGGCCTGGAGGAGGCTATCACCAGAAATGGA	Rgs12	regulator of G-protein signaling 12	chr5:35374884-35374943	NM_173402	71729	RGS12	9.20331	9.61844	7.7307	6.79435	6.67025	6.50106
A_55_P2170210	-2.19396	12.7395	-9.26271	0.000113288	0.00657434	1.85069	ENSMUSG00000054702	Gencode.M18_pc	Ap1s3	adaptor-related protein complex AP-1, sigma 3 [Source:MGI Symbol;Acc:MGI:1891304]	protein_coding	GGGGAACAGCTTACATGGCTTTTAGTGGAAAACCATTATGTGTGTTTTCTTTATTATCAT	Ap1s3	adaptor-related protein complex AP-1, sigma 3	chr1:79603599-79603540	NM_183027	252903	AP1S3	14.1748	14.017	13.3176	11.7069	11.49	11.7305
A_55_P2118866	-2.19334	8.02975	-4.50042	0.00453762	0.0469389	-2.22476	ENSMUSG00000016756	Gencode.M18_pc	Cmah	cytidine monophospho-N-acetylneuraminic acid hydroxylase [Source:MGI Symbol;Acc:MGI:103227]	protein_coding	AATGAGCTCTGCATGGGAGATAAAGCCTAACAGAAGGAAAAGTGAGTGTCAGCACAGTAG	Cmah	cytidine monophospho-N-acetylneuraminic acid hydroxylase	chr13:24562114-24562173	NM_001284519	12763	CMAH	9.03298	10.1602	8.1861	6.80644	6.86794	7.12485
A_55_P2157033	-2.18552	11.5051	-4.82354	0.00327564	0.0388423	-1.86275	ENSMUSG00000040605	Gencode.M18_pc	Bace2	beta-site APP-cleaving enzyme 2 [Source:MGI Symbol;Acc:MGI:1860440]	protein_coding	GACTGTATCTTGATTACTCTTGATTTCCAAGCTTTCAGATCTTTTCTACTTCAGAGAGAA	Bace2	beta-site APP-cleaving enzyme 2	chr16:97658618-97658677	NM_019517	56175	BACE2	12.2665	12.3941	13.133	9.48252	10.9304	10.8241
A_55_P1997595	-2.18541	7.68455	-6.00399	0.00111592	0.0213646	-0.66484	ENSMUSG00000021565	Gencode.M18_pc	Slc6a19	solute carrier family 6 (neurotransmitter transporter), member 19 [Source:MGI Symbol;Acc:MGI:1921588]	protein_coding	CTGAAGAGGGCATATTTATGCACACATGTATATATGCACACATGTGTTATCTAGATGTAT	Slc6a19	solute carrier family 6 (neurotransmitter transporter), member 19	chr13:73818777-73818718	NM_028878	74338	SLC6A19	8.69819	9.55084	8.08273	6.46473	6.66006	6.65073
A_52_P553013	-2.18533	6.43847	-5.64249	0.00152474	0.0250842	-1.01199	ENSMUSG00000005338	Gencode.M18_pc	Cadm3	cell adhesion molecule 3 [Source:MGI Symbol;Acc:MGI:2137858]	protein_coding	CGCTTTTGGGGAAACAACTTTTCCTCTTCGAGCTGAACCACTCTGTCCATATTACACAGA	Cadm3	cell adhesion molecule 3	chr1:175265226-175265167	NM_053199	94332	CADM3	7.35147	8.39976	6.84218	5.3191	5.36428	5.35405
A_55_P2024175	-2.1795	11.6428	-7.69925	0.000306389	0.011044	0.765496	ENSMUSG00000024242	Gencode.M18_pc	Map4k3	mitogen-activated protein kinase kinase kinase kinase 3 [Source:MGI Symbol;Acc:MGI:2154405]	protein_coding	GTGCACACCTCTGACTCTCTTTGGTATATGTTCATATGTTCTTTATATTTTGATGTGAGT	Map4k3	mitogen-activated protein kinase kinase kinase kinase 3	chr17:80980031-80979972	NM_001290345	225028	MAP4K3	12.5744	13.3353	12.288	10.4729	10.415	10.7713
A_52_P308413	-2.17812	12.5913	-6.64101	0.000665709	0.0164614	-0.091377	ENSMUSG00000041707	Gencode.M18_pc	Tmem273	transmembrane protein 273 [Source:MGI Symbol;Acc:MGI:1916319]	protein_coding	TGGTGAAAGAGGAACTATTTTTCAAAACGAAGTGCCGCATTAAAATAACGTCTGGAGTCC	1810011H11Rik	RIKEN cDNA 1810011H11 gene	chr14:33630901-33630960	NM_001163616	69069	TMEM273	13.7415	14.2198	13.0798	11.3916	11.8909	11.2242
A_55_P2003216	-2.17482	7.70832	-10.6896	5.16506e-05	0.00463286	2.69155	ENSMUSG00000000159	Gencode.M18_pc	Igsf5	immunoglobulin superfamily, member 5 [Source:MGI Symbol;Acc:MGI:1919308]	protein_coding	CCCTCCTAAATCTGCTGAAGTCAGCCTTCCAGAAAAACGCAGCAGTAGCCTTCCTTATCA	Igsf5	immunoglobulin superfamily, member 5	chr16:96619511-96619570	NM_001177886	72058	IGSF5	9.08811	8.34271	8.95637	6.54855	6.65418	6.65998
A_66_P122559	-2.17457	8.44706	-5.27963	0.00211769	0.0304547	-1.37754	ENSMUSG00000046916	Gencode.M18_pc	Myct1	myc target 1 [Source:MGI Symbol;Acc:MGI:1915882]	protein_coding	GTCCTTTTGCTTCAAAGACAGGAGTTCACTGGGGGATTCAGAAAGCTTGCCGTTTATGTT	Myct1	myc target 1	chr10:4740516-4740457	NM_026793	68632	MYCT1	9.39431	10.3215	8.88726	6.90909	7.39844	7.77181
A_55_P2063608	-2.17397	7.21874	-12.7826	1.91292e-05	0.00291439	3.72678	ENSMUSG00000093939	Gencode.M18_pc	Trav4d-3	T cell receptor alpha variable 4D-3 [Source:MGI Symbol;Acc:MGI:3782037]	TR_V_gene	TCCCAGGGGCAGCCTCATCAATCTTTTTTACCTGGTTCCAGGAACAAAGGAGAATGGGAG	NA	NA	chr14:54218928-54218987	M73265	NA	TRAV4D-3	8.26175	8.63279	8.02263	6.10333	6.2609	6.03103
A_55_P1954486	-2.1711	8.62579	-10.3225	6.26175e-05	0.0050644	2.487	ENSMUSG00000018411	Gencode.M18_pc	Mapt	microtubule-associated protein tau [Source:MGI Symbol;Acc:MGI:97180]	protein_coding	ATGGTGGACTCACCACAGCTTGCCACACTAGCCGATGAAGTGTCTGCTTCCTTGGCCAAG	Mapt	microtubule-associated protein tau	chr11:104189430-104189489	NM_001285454	17762	MAPT	9.49634	9.6577	9.97997	7.62784	7.16766	7.82521
A_51_P341746	-2.1703	9.15811	-4.89432	0.00305579	0.0373604	-1.78551	ENSMUSG00000006389	Agilent eArray	Mpl	myeloproliferative leukemia virus oncogene	protein_coding	CCACCCCAGCATCTTCAATACTATTTCACGTATGACAGGTGGCAGGACCTCCAATAAATA	Mpl	myeloproliferative leukemia virus oncogene	chr4:118115034-118115020	NM_010823	17480	MPL	10.3307	11.0202	9.37886	7.79061	7.90813	8.52015
A_55_P2024669	-2.16808	6.81362	-6.78606	0.00059511	0.0155882	0.0328128	ENSMUSG00000033577	Gencode.M18_pc	Myo6	myosin VI [Source:MGI Symbol;Acc:MGI:104785]	protein_coding	TGAAGAGATCTGGGAGCGTTGTGGAGGCATCCAGTACCTTCAGAGCGCCATTGAGAGCAG	Myo6	myosin VI	chr9:80155567-80155626	NM_001039546	17920	MYO6	7.93544	8.49985	7.25768	5.52607	5.75133	5.91134
A_55_P1965659	-2.16589	12.5037	-9.61753	9.22892e-05	0.00593831	2.07174	ENSMUSG00000020399	Gencode.M18_pc	Havcr2	hepatitis A virus cellular receptor 2 [Source:MGI Symbol;Acc:MGI:2159682]	protein_coding	GCTCTCATGCAGAAGGGAAAACTAATCTCAAATGTTTTAAAGTAATAAAACTGTACTGGC	Havcr2	hepatitis A virus cellular receptor 2	chr11:46294675-46294734	NM_134250	171285	HAVCR2	13.7655	13.1246	13.8698	11.5975	11.4597	11.205
A_51_P472932	-2.1612	7.67972	-6.46789	0.000762998	0.0175718	-0.242623	ENSMUSG00000039529	Gencode.M18_pc	Atp8b1	ATPase, class I, type 8B, member 1 [Source:MGI Symbol;Acc:MGI:1859665]	protein_coding	GATACCTTTGGGAATATTTTGCAGAGTTCTCTGTTGAAAAGAAACTGCTTGTGTCCCCCT	Atp8b1	ATPase, class I, type 8B, member 1	chr18:64689416-64689357	NM_001001488	54670	ATP8B1	8.12812	9.25205	8.9008	6.17639	6.7785	6.84247
A_51_P214127	-2.15869	17.2512	-16.3114	4.85751e-06	0.0015853	5.08396	ENSMUSG00000001865	Gencode.M18_pc	Cpa3	carboxypeptidase A3, mast cell [Source:MGI Symbol;Acc:MGI:88479]	protein_coding	GCCAAGTATATCCTCAAGAATACTTCCTAATGAATTGCCCTTGTTTTGAAACGTGCTAAT	Cpa3	carboxypeptidase A3, mast cell	chr3:20115733-20115674	NM_007753	12873	CPA3	18.4228	18.3461	18.2227	15.917	16.2863	16.3123
A_51_P241769	-2.15854	7.23601	-4.75494	0.00350608	0.0403948	-1.93832	ENSMUSG00000028825	Gencode.M18_pc	Rhd	Rh blood group, D antigen [Source:MGI Symbol;Acc:MGI:1202882]	protein_coding	TTGGTTTCATGACAGAGACTATTAATACTTTGGGATGAATACACCTCATTAAAGTTCTGG	Rhd	Rh blood group, D antigen	chr4:134452018-134452077	NM_011270	19746	RHD	8.48213	7.59977	8.86393	5.8167	5.72148	6.93204
A_55_P2193512	-2.1545	12.9815	-6.44879	0.000774701	0.0177622	-0.25951	ENSMUSG00000034028	Agilent eArray	Cd226	CD226 antigen	protein_coding	AGAGCAGCTCTTATCCCTCAGTGTACTGTAATCTATTGTTCTCAATGAATAAAACATAGT	Cd226	CD226 antigen	chr18:89441556-89441615	XM_006526464	225825	CD226	13.9948	14.6318	13.5498	11.6379	11.6961	12.3788
A_51_P501069	-2.15179	7.27892	-5.30173	0.00207479	0.0300823	-1.35477	ENSMUSG00000026532	Gencode.M18_pc	Spta1	spectrin alpha, erythrocytic 1 [Source:MGI Symbol;Acc:MGI:98385]	protein_coding	CACTGGAAGACTATACATCATTCCTGATTGACAAGGAGTCAGAGAATATCAAGACCAGCG	Spta1	spectrin alpha, erythrocytic 1	chr1:176176619-176176678	NM_011465	20739	SPTA1	8.02574	8.97321	8.06548	5.66602	6.03403	6.90903
A_55_P2168667	-2.1499	13.4176	-4.79207	0.00337913	0.0395647	-1.89733	ENSMUSG00000032387	Gencode.M18_pc	Rbpms2	RNA binding protein with multiple splicing 2 [Source:MGI Symbol;Acc:MGI:1919223]	protein_coding	CTGTTGTAATTGGTGACCCTGTGAGAATGTGAAACTGGATCATAAATGAAATGCAAAATA	Rbpms2	RNA binding protein with multiple splicing 2	chr9:65508259-65508318	NM_028030	71973	RBPMS2	14.1533	15.3689	13.9556	12.1499	11.95	12.9282
A_51_P401184	-2.14496	10.4912	-4.66369	0.00384171	0.0423523	-2.0399	ENSMUSG00000049404	Gencode.M18_pc	Rarres1	retinoic acid receptor responder (tazarotene induced) 1 [Source:MGI Symbol;Acc:MGI:1924461]	protein_coding	ACATAGCAGATGGATCAACAATTGCTTTGGGAAAAGGTTTCGTCTTTTTTGTTTTGAGTT	Rarres1	retinoic acid receptor responder (tazarotene induced) 1	chr3:67283137-67283078	NM_001164763	109222	RARRES1	11.4534	12.0528	11.1849	8.66391	10.318	9.27433
A_55_P2039684	-2.14186	11.8071	-5.27441	0.00212797	0.0305151	-1.38293	ENSMUSG00000040229	Gencode.M18_pc	Gpr34	G protein-coupled receptor 34 [Source:MGI Symbol;Acc:MGI:1346334]	protein_coding	GACTGAGTTGAAATGTCAGTGAACATGAGTATTACTTCAAAATCTTACATCACTTGATGC	Gpr34	G protein-coupled receptor 34	chrX:13217863-13217922	NM_011823	23890	GPR34	12.2049	13.2538	13.1755	11.1017	10.0493	11.0576
A_55_P2109239	-2.13941	6.06491	-5.12287	0.00245277	0.0329966	-1.54099	ENSMUSG00000093507	Gencode M18	Gm20627	predicted gene 20627 [Source:MGI Symbol;Acc:MGI:5313074]	processed_transcript	GTTTAAAATGTCTTATCTCACTATATTATAATATATTAAATTAATAAAATCGGATTTTAA	Gm20627	predicted gene 20627	chr3:96058605-96058546	XR_375857	102631874	GM20627	7.01588	8.01781	6.37016	5.09848	4.74498	5.14216
A_51_P257675	-2.13919	8.57608	-10.2577	6.48245e-05	0.00510507	2.45009	ENSMUSG00000039485	Gencode.M18_pc	Tspyl4	TSPY-like 4 [Source:MGI Symbol;Acc:MGI:106393]	protein_coding	TGAAAACTGTTGCTATGTCTTGTAAAAGTGGTTTCCAAAAGACAAATGTAACTGTCCTAC	Tspyl4	TSPY-like 4	chr10:34020839-34020898	NM_030203	72480	TSPYL4	9.9594	9.702	9.27564	7.27792	7.50757	7.73397
A_51_P398723	-2.13665	10.453	-7.64471	0.000318176	0.0111764	0.723986	ENSMUSG00000029648	Gencode.M18_pc	Flt1	FMS-like tyrosine kinase 1 [Source:MGI Symbol;Acc:MGI:95558]	protein_coding	AAGTAAAGAAAAGCTATCGGGATTCTCTGGTTCTGCTTAAAGACTTAGCTTTGGAGCCTA	Flt1	FMS-like tyrosine kinase 1	chr5:148373850-148373791	NM_010228	14254	FLT1	11.0351	11.4579	12.071	9.63929	9.28708	9.22766
A_55_P2003393	-2.13566	7.287	-8.20092	0.000218738	0.00924622	1.13508	ENSMUSG00000097974	Gencode M18	Gm10605	predicted gene 10605 [Source:MGI Symbol;Acc:MGI:3642596]	lincRNA	GGAGTTGCCAGTGTATTATGTCCAGTAGGTATTTCAATAAATGTCTGTCTGTTTGATGCT	Gm10605	predicted gene 10605	chr7:106777584-106777643	AK141001	100038557	GM10605	7.96252	8.29265	8.80931	5.87531	6.46515	6.31704
A_52_P37681	-2.13448	8.89442	-5.9352	0.0011829	0.0220178	-0.729641	ENSMUSG00000029781	Gencode.M18_pc	Fkbp9	FK506 binding protein 9 [Source:MGI Symbol;Acc:MGI:1350921]	protein_coding	GGACATTTCCGTTTGAAATGGCGTTTTTTACAAAGTTAAACTGTTTTGTACTGATGTTGC	Fkbp9	FK506 binding protein 9	chr6:56829199-56829258	NM_012056	27055	FKBP9	9.71981	10.749	9.4162	8.00253	7.91562	7.56339
A_55_P2011567	-2.1344	7.73257	-6.92134	0.000536962	0.0147364	0.146612	ENSMUSG00000094220	Agilent eArray	Trav6-3	T cell receptor alpha variable 6-3	TR_V_gene	AAGGCTGTTTTGCTAAACAAGCATGTGAAAGGACATGTGATGAAGGATTCTTCACTAACA	Trav6-3	T cell receptor alpha variable 6-3	chr14:54050372-54050431	AK134090	328483	TRAV6-3	8.97009	9.30139	8.12781	6.83309	6.49797	6.66504
A_51_P487813	-2.13376	14.4947	-11.4654	3.50521e-05	0.00376702	3.09982	ENSMUSG00000047557	Gencode.M18_pc	Lxn	latexin [Source:MGI Symbol;Acc:MGI:107633]	protein_coding	ACTCTTTATGTCTTGGCTACAGTACCGAGCTGCATAGATTCCATAATAAAGAATAGTACT	Lxn	latexin	chr3:67262048-67261989	NM_016753	17035	LXN	15.6827	15.727	15.2751	13.2179	13.7275	13.3381
A_51_P505823	-2.13292	12.4597	-7.05805	0.000484764	0.0139042	0.259693	ENSMUSG00000037419	Gencode.M18_pc	Endod1	endonuclease domain containing 1 [Source:MGI Symbol;Acc:MGI:1919196]	protein_coding	CACTTTAATGAGCGTGAGACAAAACCATGTTGACCGTAACTATGTACAGTGCTGTGCACC	Endod1	endonuclease domain containing 1	chr9:14158543-14158484	NM_028013	71946	ENDOD1	13.3797	14.1813	13.0175	11.2481	11.3799	11.5518
A_51_P148744	-2.13024	9.81654	-5.62464	0.00154903	0.0252962	-1.02957	ENSMUSG00000051246	Gencode.M18_pc	Msantd1	Myb/SANT-like DNA-binding domain containing 1 [Source:MGI Symbol;Acc:MGI:2684990]	protein_coding	CCCCATCTCCAGCATTAATCTAGGGACTCCAAGACGACAGGTAGTGAGAAGGTCCCAGAA	Msantd1	Myb/SANT-like DNA-binding domain containing 1	chr5:35266364-35266423	NM_207277	403174	MSANTD1	10.5882	11.3661	10.6907	8.18543	8.60542	9.46342
A_51_P101545	-2.12394	11.3849	-12.1429	2.54741e-05	0.00325414	3.43201	ENSMUSG00000029102	Gencode.M18_pc	Hgfac	hepatocyte growth factor activator [Source:MGI Symbol;Acc:MGI:1859281]	protein_coding	GGGACTCAGGTGGGCCCTTGGTCTGTGAGAAGAATGGTGTGGCTTACCTGTATGGCATCA	Hgfac	hepatocyte growth factor activator	chr5:35390807-35390866	NM_019447	54426	HGFAC	12.7668	12.099	12.4749	10.3856	10.2689	10.3143
A_51_P209736	-2.12049	7.48334	-5.95115	0.00116697	0.0219481	-0.714561	ENSMUSG00000037621	Gencode.M18_pc	Atoh8	atonal bHLH transcription factor 8 [Source:MGI Symbol;Acc:MGI:1918343]	protein_coding	TCGTCCAAGGAAATTATGGATGAGGCCCCAACAGCACAAAACCACATCATTGCTGCCCTA	Atoh8	atonal bHLH transcription factor 8	chr6:72156875-72156816	NM_153778	71093	ATOH8	8.7649	9.07952	7.78634	6.47798	6.12233	6.66898
A_55_P2372528	-2.11923	6.34776	-30.8832	1.27831e-07	0.00030872	8.04477	NA	Agilent eArray	4122401K19Rik	RIKEN cDNA 4122401K19 gene	NA	GTGAGAAAGGTGAGGTGATTCAACAAAATAAATTTTGTCTGAAACTGGCACAATAAAACC	4122401K19Rik	RIKEN cDNA 4122401K19 gene	chr19:12672668-12672727	AK014465	100306953	4122401K19RIK	7.43276	7.43972	7.34965	5.32084	5.25096	5.29265
A_55_P2054107	-2.11852	6.42662	-5.83444	0.00128952	0.0230688	-0.825609	ENSMUSG00000048191	Gencode.M18_pc	Muc6	mucin 6, gastric [Source:MGI Symbol;Acc:MGI:2663233]	protein_coding	AGTGCAAGAACTGAACAGCAGCAACTGGTTTCTGGGTACCAGAAAATGCCATTCACGATA	Muc6	mucin 6, gastric	chr7:148819961-148819902	NM_001330001	353328	MUC6	7.38227	8.11682	6.95854	5.14946	5.0594	5.89321
A_51_P212782	-2.11786	12.2941	-5.89702	0.00122206	0.0223814	-0.765853	ENSMUSG00000027398	Gencode.M18_pc	Il1b	interleukin 1 beta [Source:MGI Symbol;Acc:MGI:96543]	protein_coding	AGGTTCCTATAATATGGATGAGAATTTTTATGAATGAAGCACCAGCACATTGCTTTGATG	Il1b	interleukin 1 beta	chr2:129190406-129190347	NM_008361	16176	IL1B	13.3839	13.0434	13.6319	10.7728	10.9252	12.0076
A_52_P671769	-2.11577	11.7448	-7.06853	0.00048101	0.0138852	0.268285	ENSMUSG00000039031	Gencode.M18_pc	Arhgap18	Rho GTPase activating protein 18 [Source:MGI Symbol;Acc:MGI:1921160]	protein_coding	CTTTCAGAGTAAGTCTTCAGGGTATGACAATCATTTATGTGAACAAGCTTTTGTCGGTGT	Arhgap18	Rho GTPase activating protein 18	chr10:26637846-26637905	NM_176837	73910	ARHGAP18	12.8258	13.3433	12.239	10.3923	10.8381	10.8304
A_55_P2057777	-2.11491	11.3244	-5.03948	0.0026555	0.0345292	-1.62935	ENSMUSG00000031565	Gencode.M18_pc	Fgfr1	fibroblast growth factor receptor 1 [Source:MGI Symbol;Acc:MGI:95522]	protein_coding	GAGACGCCCAGGGTAGCATCCGTTGCTATATATTAAAAACAAACGAACAGAAAGAAAAAA	Fgfr1	fibroblast growth factor receptor 1	chr8:26685072-26685131	NM_010206	14182	FGFR1	12.6771	11.4855	12.9829	9.94054	10.6257	10.2345
A_51_P431636	-2.11044	10.0352	-4.5952	0.00411774	0.0443296	-2.11697	ENSMUSG00000050147	Gencode.M18_pc	F2rl3	coagulation factor II (thrombin) receptor-like 3 [Source:MGI Symbol;Acc:MGI:1298207]	protein_coding	TCTCACTCTGCATCGGCAGACCTTCCGATTAGCTGGCTCCGATCGCATGCTGTGTCATGA	F2rl3	coagulation factor II (thrombin) receptor-like 3	chr8:75286711-75286770	NM_007975	14065	F2RL3	11.1642	11.9585	10.1486	8.98307	8.71103	9.24584
A_55_P2068125	-2.10942	11.381	-5.28986	0.00209771	0.0302394	-1.36699	ENSMUSG00000046916	Gencode.M18_pc	Myct1	myc target 1 [Source:MGI Symbol;Acc:MGI:1915882]	protein_coding	TTTCCATCCCTTCCTGCAATGCCCACCACTTCCGGTGGAAACGGAGAGTCAGCTGATGAC	Myct1	myc target 1	chr10:4742053-4741994	NM_026793	68632	MYCT1	12.2969	13.2566	11.7536	10.2554	10.0664	10.6571
A_55_P2029581	-2.10845	7.49839	-5.65615	0.00150647	0.024919	-0.998581	NA	Agilent eArray	Gm34249	predicted gene, 34249	NA	AATGATTGAGGAATGTAGGCTGGATACCTGGGAGGAGACGATCCTGGAATCATGGAGAGT	Gm34249	predicted gene, 34249	chr6:54612304-54612363	XR_377701	102637443	GM34249	8.18666	9.37988	8.09132	6.44109	6.18484	6.70658
A_55_P1990022	-2.10285	15.0176	-15.4319	6.64249e-06	0.00170771	4.78282	ENSMUSG00000036172	Gencode.M18_pc	Cd200r3	CD200 receptor 3 [Source:MGI Symbol;Acc:MGI:1921853]	protein_coding	AACTGGCTGTAACTGTTCTCATCGTAGGATTTGCTTTTTTCCAGAAGAGAAATTATTTCA	Cd200r3	CD200 receptor 3	chr16:44957886-44957945	NM_029018	74603	CD200R3	15.9434	16.2541	16.0096	14.1311	13.7555	14.0118
A_55_P2105256	-2.10235	10.8065	-12.0324	2.68043e-05	0.00334403	3.37929	ENSMUSG00000020773	Gencode.M18_pc	Trim47	tripartite motif-containing 47 [Source:MGI Symbol;Acc:MGI:1917374]	protein_coding	TTTCCAGGTCTCTAGAACTACCTGGCACACAGTAGGTGCTCAATAAACATTTGTTAAATG	Trim47	tripartite motif-containing 47	chr11:115967127-115967068	NM_001205081	217333	TRIM47	11.5953	12.093	11.8847	9.51611	9.7754	9.9744
A_55_P2088131	-2.10048	9.24539	-5.15165	0.00238694	0.032544	-1.51073	ENSMUSG00000114196	Gencode M18	Gm47547	predicted gene, 47547 [Source:MGI Symbol;Acc:MGI:6096561]	antisense	ATGTAAAGGGCTGCAATATATGTGCCACCACTAGATAGTGCTAAACCTCTTTGTGCGCAG	Zfp975	zinc finger protein 975	chr7:49915750-49915691	NM_001008427	434179	GM47547	10.2681	11.1362	9.48261	8.16056	8.0845	8.34038
A_51_P126437	-2.10025	9.85943	-10.9018	4.63387e-05	0.00439441	2.80634	ENSMUSG00000041773	Gencode.M18_pc	Enc1	ectodermal-neural cortex 1 [Source:MGI Symbol;Acc:MGI:109610]	protein_coding	TTCTGGTATAATGGGGGAGCCTCTTTTCTCAGGCTTGACACCTGTCTGAATAAGAGTGAT	Enc1	ectodermal-neural cortex 1	chr13:98022739-98022798	NM_007930	13803	ENC1	10.7035	11.3106	10.7146	8.63476	8.88281	8.91035
A_55_P1957700	-2.10003	9.30881	-9.3606	0.000106984	0.00635902	1.91253	ENSMUSG00000026885	Gencode.M18_pc	Ttll11	tubulin tyrosine ligase-like family, member 11 [Source:MGI Symbol;Acc:MGI:1921660]	protein_coding	TTCTTTAACCAGCCTTGAGCTGTACAGCTGTAGAAAGCTATTAAATAAAGCTTTGACTTG	Ttll11	tubulin tyrosine ligase-like family, member 11	chr2:35606820-35606761	NM_029774	74410	TTLL11	10.1805	10.6095	10.2865	7.82162	8.56403	8.39073
A_52_P551011	-2.08962	8.02588	-8.06917	0.00023856	0.00959167	1.04012	ENSMUSG00000078350	Gencode.M18_pc	Smim1	small integral membrane protein 1 [Source:MGI Symbol;Acc:MGI:1916109]	protein_coding	AGCCTCATGCTATAGGAGGATCTCCCAGAAGCTGTGCTCTGGCAAGCTGGGGATAGCCAT	Smim1	small integral membrane protein 1	chr4:153397814-153397521	NM_001163721	68859	SMIM1	8.87178	9.60661	8.73369	6.86448	6.83275	7.24599
A_51_P249118	-2.08815	9.77431	-4.85379	0.00317956	0.0381653	-1.82966	ENSMUSG00000042476	Gencode.M18_pc	Abcb4	ATP-binding cassette, sub-family B (MDR/TAP), member 4 [Source:MGI Symbol;Acc:MGI:97569]	protein_coding	AGCTGCTGGCGCAGAAGGGCATCTATTTCTCAATGGTCAACATCCAGGCCGGCACACAGA	Abcb4	ATP-binding cassette, sub-family B (MDR/TAP), member 4	chr5:8959108-8959167	NM_008830	18670	ABCB4	10.6212	11.585	10.2489	8.62091	8.23866	9.33115
A_66_P128293	-2.08791	10.1593	-10.8008	4.87841e-05	0.00453142	2.75199	ENSMUSG00000049687	Gencode.M18_pc	Pheta2	PH domain containing endocytic trafficking adaptor 2 [Source:MGI Symbol;Acc:MGI:2443609]	protein_coding	TGTTTGTTCCCTAGATCTGTAGGGGAAGCCCGCTGTCCACTGCACCCATTGTACCAATGT	Fam109b	family with sequence similarity 109, member B	chr15:82175900-82175959	NM_177391	338368	PHETA2	11.1863	11.4115	11.012	9.29709	8.74177	9.30723
A_55_P2010788	-2.08742	12.3639	-14.2028	1.05993e-05	0.00215425	4.32307	ENSMUSG00000028542	Gencode.M18_pc	Slc6a9	solute carrier family 6 (neurotransmitter transporter, glycine), member 9 [Source:MGI Symbol;Acc:MGI:95760]	protein_coding	GTGCAGAACTAGGGTTTTAAAGTCCGTAGGTTTTAATGAAATTTCTATTCCTGTCTCTGA	Slc6a9	solute carrier family 6 (neurotransmitter transporter, glycine), member 9	chr4:117541851-117541910	NM_008135	14664	SLC6A9	13.4451	13.3612	13.4167	11.6291	11.2237	11.1079
A_66_P136228	-2.08253	12.3155	-11.8794	2.87831e-05	0.00342992	3.30536	ENSMUSG00000022246	Gencode.M18_pc	Rai14	retinoic acid induced 14 [Source:MGI Symbol;Acc:MGI:1922896]	protein_coding	AAACTTGAGACATTTTGTAGGACGCCTGACAAAGCGTAGCCTTTTTCTTGTGTCAGGATG	Rai14	retinoic acid induced 14	chr15:10498911-10498852	NM_030690	75646	RAI14	13.2575	13.2239	13.5889	11.2524	11.5592	11.0111
A_51_P454993	-2.0794	6.88214	-7.87892	0.000270985	0.0102257	0.900377	ENSMUSG00000042066	Gencode.M18_pc	Tmcc2	transmembrane and coiled-coil domains 2 [Source:MGI Symbol;Acc:MGI:1916125]	protein_coding	TCATGTAAGCCACTAAGATAGAAGGCCAGTCTCAGTTTCCCTAGGGAAGAGCCCATCCTG	Tmcc2	transmembrane and coiled-coil domains 2	chr1:134253773-134253714	NM_178874	68875	TMCC2	7.49013	7.81889	8.4565	5.91703	5.6085	6.00177
A_66_P111021	-2.07824	9.32728	-6.60088	0.000686919	0.0166837	-0.12614	ENSMUSG00000038745	Gencode.M18_pc	Nlrp6	NLR family, pyrin domain containing 6 [Source:MGI Symbol;Acc:MGI:2141990]	protein_coding	AGAACACGATGAAAGATGCTGTAGCCCAAAGTCCCTCTGAATATGACCTCCCCATTCAAA	Nlrp6	NLR family, pyrin domain containing 6	chr7:148113479-148113538	NM_133946	101613	NLRP6	10.5001	10.6334	9.96568	8.07336	7.89348	8.89762
A_52_P72587	-2.07386	12.0458	-8.7295	0.000156265	0.00785138	1.50198	ENSMUSG00000026778	Gencode.M18_pc	Prkcq	protein kinase C, theta [Source:MGI Symbol;Acc:MGI:97601]	protein_coding	CATTTACTTGAAAGATGGTTCCCGATGCTGTGAAAGATTCGAAATGCAGTTCTGCTCTTG	Prkcq	protein kinase C, theta	chr2:11222026-11222085	NM_008859	18761	PRKCQ	13.2203	13.199	12.8289	11.2569	10.5207	11.249
A_55_P1973838	-2.07258	12.6531	-13.056	1.69948e-05	0.00270023	3.84753	ENSMUSG00000028542	Gencode.M18_pc	Slc6a9	solute carrier family 6 (neurotransmitter transporter, glycine), member 9 [Source:MGI Symbol;Acc:MGI:95760]	protein_coding	GCCCAGTGTGTGCAGAACTAGGGTTTTAAAGTCCGTAGGTTTTAATGAAATTTCTATTCC	Slc6a9	solute carrier family 6 (neurotransmitter transporter, glycine), member 9	chr4:117541842-117541901	NM_008135	14664	SLC6A9	13.736	13.6156	13.7165	11.9396	11.5552	11.3557
A_55_P2116536	-2.0724	7.05284	-5.21761	0.00224358	0.0314156	-1.4418	ENSMUSG00000051726	Gencode.M18_pc	Kcnf1	potassium voltage-gated channel, subfamily F, member 1 [Source:MGI Symbol;Acc:MGI:2687399]	protein_coding	TTCATTCCCCTGCTGACAGAGGAGAAGCATCATAGGACCCGCCTACAGAGTTGCAAGTGA	Kcnf1	potassium voltage-gated channel, subfamily F, member 1	chr12:17181566-17181507	NM_201531	382571	KCNF1	8.18481	8.84405	7.23826	5.94456	5.95572	6.14965
A_51_P191354	-2.07223	8.0859	-7.23633	0.000425269	0.0130043	0.404312	ENSMUSG00000043487	Gencode.M18_pc	Acot6	acyl-CoA thioesterase 6 [Source:MGI Symbol;Acc:MGI:1921287]	protein_coding	CAAGCCAGTAGCTTTCACTTCTCTTTTCTCTGAGCGGTAGGCTAAGAACTCTTGCATCTT	Acot6	acyl-CoA thioesterase 6	chr12:85451951-85452010	AK014558	217700	ACOT6	8.71938	9.72811	8.91855	6.94693	6.89089	7.31153
A_65_P20249	-2.07166	13.6672	-7.57499	0.000334021	0.0114912	0.670514	ENSMUSG00000052889	Agilent eArray	Prkcb	protein kinase C, beta	protein_coding	TATCTAAGAGCCAAGTCTATGGCATTAGCTGTGAGAAGTAGTTACCACTGTAATTCACCT	Prkcb	protein kinase C, beta	chr7:129776886-129776945	NM_008855	18751	PRKCB	14.8638	15.1014	14.144	12.3565	12.7329	12.8047
A_55_P2092953	-2.06869	11.0025	-10.544	5.57078e-05	0.00485113	2.61135	ENSMUSG00000026637	Gencode.M18_pc	Traf5	TNF receptor-associated factor 5 [Source:MGI Symbol;Acc:MGI:107548]	protein_coding	AAAGACGACACACTGTTCTTGAAAGTGGCCGTGGATTTAACTGACTTGGAGGATCTGTAG	Traf5	TNF receptor-associated factor 5	chr1:193821370-193821311	NM_011633	22033	TRAF5	11.7689	12.1104	12.2312	9.73734	9.85502	10.3121
A_55_P2137206	-2.06808	12.999	-7.47729	0.000357785	0.0119868	0.594838	ENSMUSG00000007613	Gencode.M18_pc	Tgfbr1	transforming growth factor, beta receptor I [Source:MGI Symbol;Acc:MGI:98728]	protein_coding	TTTCATCCTAACACTACAGTAGAAAATGGAAGCAATGCAAATAAACAACTTTTTCCCACC	Tgfbr1	transforming growth factor, beta receptor I	chr4:47427736-47427795	NM_009370	21812	TGFBR1	13.9183	14.6122	13.5686	11.76	12.0541	12.0807
A_51_P242859	-2.06074	14.4725	-6.07994	0.00104699	0.0206909	-0.593969	ENSMUSG00000021211	Gencode.M18_pc	Akr1c12	aldo-keto reductase family 1, member C12 [Source:MGI Symbol;Acc:MGI:1351661]	protein_coding	AGTAAGCTATTGGATTACTGCAAGTCAAAAGACATTGTTCTTGTTGCTTACGGTGCTCTG	Akr1c12	aldo-keto reductase family 1, member C12	chr13:4272257-4272198	NM_013777	622402	AKR1C12	15.4044	16.0721	15.0321	13.9589	13.1435	13.2239
A_51_P242930	-2.06013	14.1922	-10.7083	5.11546e-05	0.00462558	2.70177	ENSMUSG00000040751	Gencode.M18_pc	Lat2	linker for activation of T cells family, member 2 [Source:MGI Symbol;Acc:MGI:1926479]	protein_coding	ACTCTTTTTGTGGTTAACTGAAGTTGCTGGAGTCGTATTTAATATTGTCAATGTCAGGGG	Lat2	linker for activation of T cells family, member 2	chr5:135076388-135076329	NM_020044	56743	LAT2	15.3703	15.4685	14.8278	13.297	12.9919	13.1973
A_55_P2044653	-2.05378	11.2754	-6.75667	0.00060869	0.0157612	0.00782827	ENSMUSG00000030483	Gencode.M18_pc	Cyp2b10	cytochrome P450, family 2, subfamily b, polypeptide 10 [Source:MGI Symbol;Acc:MGI:88598]	protein_coding	CACTTATCAGCTCTCCATGATCTGGGATCTGTGCTAATGGACTCTGTATAAGGTCTGAAT	Cyp2b10	cytochrome P450, family 2, subfamily b, polypeptide 10	chr7:26711522-26711581	NM_009999	13088	CYP2B10	12.3193	12.4889	12.0988	10.1209	9.73618	10.8885
A_55_P2156062	-2.0473	8.30012	-4.6711	0.00381316	0.0421747	-2.03162	ENSMUSG00000116121	Gencode.M18_pc	Gm49486	predicted gene, 49486 [Source:MGI Symbol;Acc:MGI:6155161]	protein_coding	ACCCACAGTTCAGAGTGTTTGTGGATGGACACAAACTTTTTGATTTTTATCATTGTATTC	Pick1	protein interacting with C kinase 1	chr15:79086401-79086460	XR_875478	18693	GM49486	9.17801	10.2246	8.56872	7.05934	7.10867	7.66139
A_55_P2021704	-2.04401	8.77408	-17.9876	2.79169e-06	0.00133634	5.60217	ENSMUSG00000023960	Gencode.M18_pc	Enpp5	ectonucleotide pyrophosphatase/phosphodiesterase 5 [Source:MGI Symbol;Acc:MGI:1933830]	protein_coding	ATTCTGCACCGTTTCTTGCTAACTTGGAGGCTGTGGATAATACAGCAGTTTACTTACTGA	Enpp5	ectonucleotide pyrophosphatase/phosphodiesterase 5	chr17:44219896-44219955	NM_001329619	83965	ENPP5	9.76945	9.93484	9.68397	7.92534	7.68546	7.64542
A_51_P446131	-2.04125	8.06838	-5.99318	0.00112615	0.0214798	-0.674983	ENSMUSG00000039131	Gencode.M18_pc	Gipc2	GIPC PDZ domain containing family, member 2 [Source:MGI Symbol;Acc:MGI:1889209]	protein_coding	TGATGATCTCCTTGAGCTGTACATGGGGATTCGAGATATTGACTTAGCTACAACCATGTT	Gipc2	GIPC PDZ domain containing family, member 2	chr3:151765629-151757247	NM_016867	54120	GIPC2	9.06531	9.7744	8.42731	6.94975	6.94453	7.24898
A_55_P2004571	-2.04046	9.68572	-4.80655	0.00333107	0.0392683	-1.88141	ENSMUSG00000029406	Gencode.M18_pc	Pitpnm2	phosphatidylinositol transfer protein, membrane-associated 2 [Source:MGI Symbol;Acc:MGI:1336192]	protein_coding	TTAGTGTGCTCTCTGTATACCGTGTCACAGTCTGTTACACCAATTAAAGAAGCAGGAGGC	Pitpnm2	phosphatidylinositol transfer protein, membrane-associated 2	chr5:124568761-124568702	NM_011256	19679	PITPNM2	10.8827	11.4336	9.80157	8.90702	8.37525	8.7142
A_55_P2048448	-2.03323	6.05556	-10.3481	6.17715e-05	0.00505016	2.50149	ENSMUSG00000067599	Gencode.M18_pc	Klra7	killer cell lectin-like receptor, subfamily A, member 7 [Source:MGI Symbol;Acc:MGI:101901]	protein_coding	GATTTTCATATGACAATAAGAGAAAAGATTGGGTATGGATTGACAATGGCCCATCTAAAC	Klra23	killer cell lectin-like receptor subfamily A, member 23	chr6:130248781-130248722	NM_024470	79410	KLRA7	6.64628	7.39444	7.1758	5.07915	5.04976	4.98792
A_51_P371279	-2.03228	6.71138	-8.54187	0.000175713	0.00834893	1.37426	ENSMUSG00000026009	Gencode.M18_pc	Icos	inducible T cell co-stimulator [Source:MGI Symbol;Acc:MGI:1858745]	protein_coding	TAGAACCAACATGCTCTCTTCCAATTCCTAGACTCTAGCTGATCACTGCTTCAGGGCTTA	Icos	inducible T cell co-stimulator	chr1:61055103-61055162	NM_017480	54167	ICOS	8.15894	7.7993	7.22433	5.69591	5.77017	5.61965
A_55_P2131088	-2.02869	13.671	-15.9675	5.47892e-06	0.00164204	4.9688	ENSMUSG00000023186	Gencode.M18_pc	Vwa5a	von Willebrand factor A domain containing 5A [Source:MGI Symbol;Acc:MGI:1915026]	protein_coding	CCCTCAGCTTTCTGATATGATTTAATAAGAATTGCTGATGTCTAGGTAAACCTTCTTAGT	Vwa5a	von Willebrand factor A domain containing 5A	chr9:38550241-38550300	NM_172767	67776	VWA5A	14.7652	14.8018	14.4891	12.4884	12.6892	12.7924
A_55_P2118717	-2.02691	8.18419	-5.66765	0.00149127	0.0248152	-0.987297	ENSMUSG00000068115	Gencode.M18_pc	Ninl	ninein-like [Source:MGI Symbol;Acc:MGI:1925427]	protein_coding	TCTTACTGAAAAAGACTCAGACCCTCAGCAAAGAACAATGGAGAGAAAGTAGGTGAGTAC	Ninl	ninein-like	chr2:150760745-150760686	NM_207204	78177	NINL	9.16758	9.87723	8.54814	6.95777	7.03327	7.52117
A_51_P307168	-2.02383	5.98196	-6.85204	0.000565886	0.0151763	0.0885581	ENSMUSG00000028194	Gencode.M18_pc	Ddah1	dimethylarginine dimethylaminohydrolase 1 [Source:MGI Symbol;Acc:MGI:1916469]	protein_coding	GATGAGCTAGAAGGATTGCATAGTTAGCACTATGTCTTTAACTGGTGGGTTGCTGTACCA	Ddah1	dimethylarginine dimethylaminohydrolase 1	chr3:145556803-145556862	NM_026993	69219	DDAH1	7.65932	6.51548	6.80682	4.88125	4.9835	5.04539
A_55_P2039876	-2.02246	7.38329	-4.52383	0.00442953	0.0462548	-2.198	ENSMUSG00000050761	Gencode.M18_pc	Gp1bb	glycoprotein Ib, beta polypeptide [Source:MGI Symbol;Acc:MGI:107852]	protein_coding	TCAATAGGCAAAGTCTTGGATCAGAGGTGGATGGAAACTCGAGCCAGCGCCCAGAGTGGC	Gp1bb	glycoprotein Ib, beta polypeptide	chr16:18621594-18621535	NM_001001999	14724	GP1BB	8.55323	9.15963	7.4707	6.12007	6.23915	6.75698
A_55_P2289707	-2.02124	7.77113	-7.67319	0.000311956	0.0111103	0.745697	ENSMUSG00000017412	Gencode.M18_pc	Cacnb4	calcium channel, voltage-dependent, beta 4 subunit [Source:MGI Symbol;Acc:MGI:103301]	protein_coding	CGACATAGGCTTTGAGGCTGCCGAAACAAACAAACAAACAAACAAACAAACATCATCTGT	Cacnb4	calcium channel, voltage-dependent, beta 4 subunit	chr2:52290023-52289964	NM_001285427	12298	CACNB4	8.36422	9.01643	8.9646	6.62076	6.46019	7.20058
A_66_P116372	-2.01606	11.9373	-8.18706	0.000220731	0.0092871	1.12516	ENSMUSG00000023045	Gencode.M18_pc	Soat2	sterol O-acyltransferase 2 [Source:MGI Symbol;Acc:MGI:1332226]	protein_coding	ACACGTTTGGTTCTTTCTGCTTCTCCCAATGCAACAATAAAAATCTTAGTCTCGGACTGG	Soat2	sterol O-acyltransferase 2	chr15:101993657-101993716	NM_146064	223920	SOAT2	12.9665	12.4536	13.416	11.0527	10.8229	10.9123
A_51_P329928	-2.01603	11.2939	-7.92372	0.000262912	0.0101304	0.933566	ENSMUSG00000041801	Gencode.M18_pc	Phlda3	pleckstrin homology like domain, family A, member 3 [Source:MGI Symbol;Acc:MGI:1351485]	protein_coding	GTAAGGGTTGGCCCTTTACCATTTCATGCTTATTCCAGAATGAAGAGGCCCAGTTCGTGG	Phlda3	pleckstrin homology like domain, family A, member 3	chr1:137665642-137665701	NM_013750	27280	PHLDA3	12.1239	12.6672	12.1148	9.88056	10.2894	10.6878
A_52_P343856	-2.01464	9.20461	-26.0883	3.35748e-07	0.000419407	7.37141	ENSMUSG00000038648	Gencode.M18_pc	Creb3l2	cAMP responsive element binding protein 3-like 2 [Source:MGI Symbol;Acc:MGI:2442695]	protein_coding	ACCCACAGTGGTACCTTTTACAGTCAGGTTTGGATACTTTGCAGCTCATCCAAAGAGACA	Creb3l2	cAMP responsive element binding protein 3-like 2	chr6:37281267-37281208	NM_178661	208647	CREB3L2	10.1726	10.1454	10.3178	8.22044	8.19889	8.17255
A_55_P1973809	-2.01417	16.0093	-7.27866	0.000412414	0.0128351	0.438185	ENSMUSG00000073940	Gencode.M18_pc	Hbb-bt	hemoglobin, beta adult t chain [Source:MGI Symbol;Acc:MGI:5474850]	protein_coding	TTTTCTGCTATTGTCTATGCACAAAGGTTATATGTCCCCTAGAGAAAAACTGTCAATTGT	Hbb-bt	hemoglobin, beta adult t chain	chr7:110961164-110961105	NM_008220	101488143	HBB-BT	16.6785	16.9318	17.4389	14.8473	14.6973	15.4621
A_52_P52910	-2.01413	6.2721	-5.5133	0.00171084	0.0266224	-1.14013	ENSMUSG00000034871	Gencode.M18_pc	Fam151a	family with sequence simliarity 151, member A [Source:MGI Symbol;Acc:MGI:2657115]	protein_coding	TGCTGGACAGTGGTTATCAGGAGCAGATGGTCACAGATATGCTGGAGCTGTGTCAGGGAC	Fam151a	family with sequence simliarity 151, member A	chr4:106420510-106420569	NM_146149	230579	FAM151A	8.0038	7.30668	6.52702	5.31873	5.12912	5.34727
A_51_P359237	-2.01354	13.1136	-7.06453	0.000482438	0.0138899	0.265008	ENSMUSG00000026411	Gencode.M18_pc	Tmem9	transmembrane protein 9 [Source:MGI Symbol;Acc:MGI:1913491]	protein_coding	TCATTGTATCATGCATGGAGAGAAATGTTTGTCTTTCTGTTGTCTATACATCAAAGAAGC	Tmem9	transmembrane protein 9	chr1:137931523-137931582	NM_025439	66241	TMEM9	13.9628	14.7352	13.6632	12.213	11.9127	12.1948
A_55_P1958140	-2.01158	7.67529	-10.6074	5.38986e-05	0.00473916	2.64639	ENSMUSG00000001039	Gencode.M18_pc	B9d1	B9 protein domain 1 [Source:MGI Symbol;Acc:MGI:1351471]	protein_coding	CAGGCTGGGAAACAGGGGAGCTAAAGGTAGTTTTATATAATAAAGTGTCACATGTTTTTC	B9d1	B9 protein domain 1	chr11:61326368-61326427	NM_013717	27078	B9D1	8.68521	8.90979	8.44824	6.55604	6.45088	7.00157
A_55_P2115310	-2.00374	7.14709	-8.87117	0.000143229	0.00751848	1.59665	ENSMUSG00000045004	Gencode.M18_pc	Spata21	spermatogenesis associated 21 [Source:MGI Symbol;Acc:MGI:3607787]	protein_coding	ACATAGCTCTGACAGCAGAAAGTGGCTTAGCTCCATGCCAGCTCGAACCCACTGACCCTC	Spata21	spermatogenesis associated 21	chr4:140668513-140668572	NM_177867	329972	SPATA21	8.64833	7.91647	7.88209	6.28515	6.03328	6.11723
A_52_P189984	-2.00176	8.36384	-7.63442	0.00032046	0.0112272	0.716118	ENSMUSG00000032352	Gencode.M18_pc	Lrrc1	leucine rich repeat containing 1 [Source:MGI Symbol;Acc:MGI:2442313]	protein_coding	GAGGGCATTGGAAAACTAAAGAAGCTGTCAATCTTGAAGTTGGATCAGAACAGACTCACA	Lrrc1	leucine rich repeat containing 1	chr9:77302974-77300479	NM_172528	214345	LRRC1	9.66848	9.63812	8.78755	7.54644	7.34213	7.20031
A_51_P421303	-2.0015	8.89462	-7.43287	0.000369234	0.012171	0.560135	ENSMUSG00000025468	Gencode.M18_pc	Caly	calcyon neuron-specific vesicular protein [Source:MGI Symbol;Acc:MGI:1915816]	protein_coding	ACCAGCTACTTTGACATGCACACTGCCTGACGCTTCTCCACCCAGTGATTGTGCTCCTGT	Caly	calcyon neuron-specific vesicular protein	chr7:147255924-147255865	NM_026769	68566	CALY	10.5105	9.51675	9.65885	7.9955	7.84507	7.84103
A_51_P206824	-1.99728	5.93899	-11.7694	3.03113e-05	0.00353814	3.25153	ENSMUSG00000038403	Agilent eArray	Hfe2	hemochromatosis type 2 (juvenile)	protein_coding	AGTTTGTCCATTCAAACTGCTAACCTTTGGAGTCACGTGGAGATTCGAGCTGCCTACATT	Hfe2	hemochromatosis type 2 (juvenile)	chr3:96332113-96332172	NM_027126	69585	HFE2	6.66325	6.89443	7.25521	4.81727	4.91567	5.0881
A_55_P1952235	-1.99495	10.7084	-5.36658	0.00195456	0.0288924	-1.28834	ENSMUSG00000037211	Gencode.M18_pc	Spry1	sprouty RTK signaling antagonist 1 [Source:MGI Symbol;Acc:MGI:1345139]	protein_coding	CTCATGTCTGAATATAACATATCACTACTTCAAGAAAAGCAAGGTGACTCGAAGAAAGTA	Spry1	sprouty homolog 1 (Drosophila)	chr3:37543403-37543462	NM_011896	24063	SPRY1	11.5366	12.3857	11.1955	9.19224	10.0233	9.91739
A_51_P377390	-1.99492	11.6069	-5.19618	0.00228904	0.0317552	-1.46412	ENSMUSG00000039308	Gencode.M18_pc	Ndst2	N-deacetylase/N-sulfotransferase (heparan glucosaminyl) 2 [Source:MGI Symbol;Acc:MGI:97040]	protein_coding	GAGGGGATCCATCTCTTTCCCATAGTTTTGGGACCTAATAAAGGGGCTTCCCTTGGCATC	Ndst2	N-deacetylase/N-sulfotransferase (heparan glucosaminyl) 2	chr14:21543317-21543258	NM_010811	17423	NDST2	12.7404	13.2832	11.7896	10.5906	10.3992	10.8385
A_52_P29953	-1.99181	8.20829	-8.12286	0.00023024	0.00940325	1.079	ENSMUSG00000048458	Gencode.M18_pc	Inka2	inka box actin regulator 2 [Source:MGI Symbol;Acc:MGI:1923497]	protein_coding	AAATCTGTAGCTTTTTGCTAGGCAATGTACCTATCTCAGAACGATTAATCAATGGGGTCA	Fam212b	family with sequence similarity 212, member B	chr3:105521608-105521667	NM_175398	109050	INKA2	8.87502	9.68696	9.0506	7.01996	7.12738	7.48981
A_55_P1997450	-1.99074	6.07579	-6.64334	0.000664502	0.0164614	-0.0893655	ENSMUSG00000095718	Gencode.M18_pc	Gm6502	predicted gene 6502 [Source:MGI Symbol;Acc:MGI:3779601]	protein_coding	AGTGCTATGATGAATTTGCTCAAGTCTCTGTAGAAAGATTTGCCCAAGTTTGTCAGGATC	NA	NA	chr5:96034146-96034205	XM_011249641	NA	GM6502	6.85043	7.75812	6.60493	5.13306	5.04106	5.06712
A_55_P2174836	-1.98972	7.72254	-8.71623	0.000157555	0.00788343	1.49304	ENSMUSG00000024924	Gencode.M18_pc	Vldlr	very low density lipoprotein receptor [Source:MGI Symbol;Acc:MGI:98935]	protein_coding	ACAGTGAGACAAAAGATATCAACACAACAGACATTCTACGAACTAGTGGACTGGTTCCTG	Vldlr	very low density lipoprotein receptor	chr19:27321104-27321163	NM_013703	22359	VLDLR	8.41885	9.0308	8.70255	6.55454	7.11793	6.51059
A_52_P125467	-1.98556	7.02982	-4.90045	0.00303755	0.0372526	-1.77885	ENSMUSG00000038555	Gencode.M18_pc	Reep2	receptor accessory protein 2 [Source:MGI Symbol;Acc:MGI:2385070]	protein_coding	GGTAGGGCTGTGTATTCTACCAAAAGAGAGGTGAGATGCTAAGGGTGTGCGTGTTAGGGA	Reep2	receptor accessory protein 2	chr18:35006587-35006646	NM_144865	225362	REEP2	8.0718	8.7611	7.23488	5.97709	5.74198	6.39204
A_66_P130911	-1.98129	7.21662	-4.95545	0.00287936	0.0360303	-1.71937	ENSMUSG00000045319	Gencode.M18_pc	Proser2	proline and serine rich 2 [Source:MGI Symbol;Acc:MGI:2442238]	protein_coding	AATTCCCAGGGCTTTGATTATGGGGGATCTGACCTTTCCCAAGATTCAGTAGTGACTTTA	Proser2	proline and serine rich 2	chr2:6018799-6018740	AK132370	227545	PROSER2	7.88097	9.11327	7.62755	5.99112	6.31517	6.37163
A_55_P1990870	-1.98022	8.7517	-8.29818	0.000205326	0.00894007	1.20427	ENSMUSG00000031698	Gencode.M18_pc	Mylk3	myosin light chain kinase 3 [Source:MGI Symbol;Acc:MGI:2443063]	protein_coding	ATGCTACATACCCATGTGCCATGGGCAGTACTAATTAGTCTGGGGAGGTTAACTAATAGC	Mylk3	myosin light chain kinase 3	chr8:87848405-87848346	XM_006530825	213435	MYLK3	9.61503	9.96056	9.64984	7.85423	7.28313	8.1474
A_55_P2059347	-1.97868	13.639	-10.5807	5.46519e-05	0.00478587	2.63166	ENSMUSG00000038150	Gencode.M18_pc	Ormdl3	ORM1-like 3 (S. cerevisiae) [Source:MGI Symbol;Acc:MGI:1913862]	protein_coding	CTTCTGGTCTTTCTAAGCAAAGTGTGAATAGGATTTTTACTCCCTTTGTACAGTATTCTG	Ormdl3	ORM1-like 3 (S. cerevisiae)	chr11:98442667-98442608	NM_025661	66612	ORMDL3	14.7523	14.833	14.2997	12.4597	12.5872	12.902
A_55_P2007500	-1.97715	6.83064	-8.78406	0.000151087	0.00770588	1.53862	ENSMUSG00000096847	Gencode.M18_pc	Tmem151b	transmembrane protein 151B [Source:MGI Symbol;Acc:MGI:2685169]	protein_coding	TCCAAGCGCAAAGATTGTACAAATCACACTGATGGATAATAAAAGTGTGGATGACTCACT	Tmem151b	transmembrane protein 151B	chr17:45678962-45678903	NM_001013749	210573	TMEM151B	7.84876	8.25328	7.3556	5.82957	5.84789	5.84873
A_51_P103222	-1.97443	12.5544	-10.7874	4.91176e-05	0.00455073	2.74478	ENSMUSG00000063354	Gencode.M18_pc	Slc39a4	solute carrier family 39 (zinc transporter), member 4 [Source:MGI Symbol;Acc:MGI:1919277]	protein_coding	CTCTGCTTTACCTTCTTAAGCCACCTAATTGTTGGCCCCACTACGGGTAGCCAGAGGCTT	Slc39a4	solute carrier family 39 (zinc transporter), member 4	chr15:76442925-76442866	NM_028064	72027	SLC39A4	13.2641	13.6026	13.7582	11.282	11.6526	11.767
A_55_P2100425	-1.97069	6.52321	-29.6228	1.62287e-07	0.000327488	7.88687	ENSMUSG00000029245	Gencode.M18_pc	Epha5	Eph receptor A5 [Source:MGI Symbol;Acc:MGI:99654]	protein_coding	GTTCCCATCTGCATTTGTTTGTGCTTTCAGTTTGTGTACATGTTTTTGTAGTGTAAGATA	Epha5	Eph receptor A5	chr5:84483896-84483837	NM_007937	13839	EPHA5	7.48296	7.51867	7.52403	5.53647	5.58356	5.49357
A_55_P2012960	-1.97018	5.83866	-7.48157	0.000356704	0.0119868	0.59817	ENSMUSG00000028597	Gencode.M18_pc	Gpx7	glutathione peroxidase 7 [Source:MGI Symbol;Acc:MGI:1914555]	protein_coding	AGCATTATTTGTGATAATAAAACCTGAGTTTGACATAAATGTCTAGCCCGTGGAAACCTG	Gpx7	glutathione peroxidase 7	chr4:108073054-108072995	NM_024198	67305	GPX7	7.42113	6.49811	6.55203	4.92411	4.92239	4.71422
A_51_P104418	-1.96851	9.84891	-9.41899	0.000103419	0.00623369	1.9491	ENSMUSG00000039384	Gencode.M18_pc	Dusp10	dual specificity phosphatase 10 [Source:MGI Symbol;Acc:MGI:1927070]	protein_coding	GACTCTATTTTTAATAAGTGTAAGAAGACTGTAACTTTTGATGCGAATGAGACCCACTTC	Dusp10	dual specificity phosphatase 10	chr1:185898608-185898667	NM_022019	63953	DUSP10	10.7492	11.2494	10.5009	8.70413	8.85886	9.03099
A_55_P1981306	-1.96467	8.69604	-6.05971	0.00106485	0.0209168	-0.612772	ENSMUSG00000025104	Gencode.M18_pc	Hdgfl3	HDGF like 3 [Source:MGI Symbol;Acc:MGI:1352760]	protein_coding	ACTGTGTCTAATGTTTTGTGTGGCACCTATCACGTTGTTAGAGTTCAATAAACATTCAAC	Hdgfl3	HDGF like 3	chr7:89026201-89026142	NM_013886	29877	HDGFL3	8.94569	10.1829	9.90652	7.78408	7.78807	7.56898
A_55_P1979674	-1.96367	9.95752	-15.1184	7.45756e-06	0.00175427	4.67004	ENSMUSG00000002578	Gencode.M18_pc	Ikzf4	IKAROS family zinc finger 4 [Source:MGI Symbol;Acc:MGI:1343139]	protein_coding	CCATCCCACTCTCTGCTTCTTTGAGATTCAAACCAAAGGATGTTTTTTCTATATTTAAAG	Ikzf4	IKAROS family zinc finger 4	chr10:128069580-128069521	NM_011772	22781	IKZF4	11.1299	10.735	10.9532	9.11495	8.85519	8.9569
A_55_P2170349	-1.96011	7.19096	-7.74515	0.000296858	0.0108767	0.800229	ENSMUSG00000030178	Gencode M18	Klra13-ps	killer cell lectin-like receptor subfamily A, member 13, pseudogene [Source:MGI Symbol;Acc:MGI:1321090]	transcribed_unprocessed_pseudogene	ATGACATGACAGAGCAGAGGACATCTTCCTTCCTTGTGGAAAATGGACAGATCTTCTCTG	Klra22	killer cell lectin-like receptor subfamily A, member 22	chr6:129922234-129922175	NM_053152	93969	KLRA13-PS	7.64968	8.53568	8.3277	6.35097	5.96576	6.316
A_55_P2088995	-1.95874	15.2231	-9.08566	0.000125822	0.00699083	1.73717	ENSMUSG00000032369	Gencode.M18_pc	Plscr1	phospholipid scramblase 1 [Source:MGI Symbol;Acc:MGI:893575]	protein_coding	GTTCCCGCTAGACCTGGATGTGAAGATGAAAGCTGTGATGCTTGGTGCTTGTTTCCTCAT	Plscr1	phospholipid scramblase 1	chr9:92164754-92164813	NM_011636	22038	PLSCR1	15.9951	16.6243	15.988	14.1823	14.0557	14.4933
A_51_P229676	-1.95864	14.9526	-10.2726	6.43079e-05	0.00509722	2.45862	ENSMUSG00000032369	Gencode.M18_pc	Plscr1	phospholipid scramblase 1 [Source:MGI Symbol;Acc:MGI:893575]	protein_coding	TAACTCCCTGAGAGTTCTTGAGGTTTAAGGACGACAACTTTATGGACCCTGAATGGAAAC	Plscr1	phospholipid scramblase 1	chr9:92166424-92166483	NM_011636	22038	PLSCR1	15.7878	16.2945	15.7133	13.8893	13.8278	14.2026
A_52_P350950	-1.95805	9.10037	-4.87914	0.0031015	0.0375894	-1.80202	ENSMUSG00000007379	Gencode.M18_pc	Dennd2c	DENN/MADD domain containing 2C [Source:MGI Symbol;Acc:MGI:3036254]	protein_coding	GGGATACAACTCACTGACTTGTATAGTATTGTCATTGTCACTCATACTAGGGTGTCTGAA	Dennd2c	DENN/MADD domain containing 2C	chr3:102973199-102973258	NM_177857	329727	DENND2C	9.9024	10.8085	9.52726	7.55847	8.31634	8.48923
A_55_P2119969	-1.95779	7.61523	-4.92186	0.00297483	0.0367802	-1.75565	ENSMUSG00000028167	Gencode.M18_pc	Bdh2	3-hydroxybutyrate dehydrogenase, type 2 [Source:MGI Symbol;Acc:MGI:1917022]	protein_coding	GAGTGTGACTCTTTAATAGTCTCTCGTCTCTTCTGAAGCTGTGGTAAATAAATCAAATAA	Bdh2	3-hydroxybutyrate dehydrogenase, type 2	chr3:134967309-134967368	NM_001172055	69772	BDH2	8.32028	7.95399	9.50811	6.54695	6.65358	6.70846
A_55_P2013043	-1.95774	10.6773	-6.127	0.00100673	0.0203232	-0.550403	ENSMUSG00000042842	Gencode.M18_pc	Serpinb6b	serine (or cysteine) peptidase inhibitor, clade B, member 6b [Source:MGI Symbol;Acc:MGI:894688]	protein_coding	CCTTCATCCTCTCTGCAGCAATACTGGGATCTCAATTTTTTGGTTACTTAGTAATTTATT	Serpinb6b	serine (or cysteine) peptidase inhibitor, clade B, member 6b	chr13:33070776-33070835	NM_011454	20708	SERPINB6B	11.4816	11.1799	12.3069	9.6722	9.42252	10.0005
A_55_P1985693	-1.956	7.58736	-5.80511	0.00132261	0.0233729	-0.853788	ENSMUSG00000041842	Gencode.M18_pc	Fhdc1	FH2 domain containing 1 [Source:MGI Symbol;Acc:MGI:2684972]	protein_coding	CCGAGACAAAGATCCAATAATAGTCTGGACATGTAAGATGACAATTCTTATGTAACAAGT	Fhdc1	FH2 domain containing 1	chr3:84248102-84248043	NM_001205355	229474	FHDC1	8.34167	8.25547	9.09895	6.2094	7.18137	6.4373
A_51_P234788	-1.954	11.0839	-6.28267	0.000885733	0.019078	-0.408172	ENSMUSG00000046668	Gencode.M18_pc	Cxxc5	CXXC finger 5 [Source:MGI Symbol;Acc:MGI:1914643]	protein_coding	TGGAGAGATGAAAATTCTATTCATTTGTTGATCCACTGAGATCTGGAGAGCCCACATCTC	Cxxc5	CXXC finger 5	chr18:36021053-36021112	NM_133687	67393	CXXC5	12.3322	12.5081	11.3423	10.1846	10.1097	10.0263
A_55_P2025038	-1.95312	6.48178	-14.5893	9.11396e-06	0.00197702	4.47286	ENSMUSG00000037852	Gencode.M18_pc	Cpe	carboxypeptidase E [Source:MGI Symbol;Acc:MGI:101932]	protein_coding	TTTGAAGAATGGAATTGTATTAGTCAGCCTGTTAATGCCACTTCAGAGTTTGGGGTTTTG	Cpe	carboxypeptidase E	chr8:67071460-67071401	NM_013494	12876	CPE	7.70856	7.4038	7.26267	5.44542	5.45638	5.61386
A_52_P89064	-1.95205	7.5639	-17.9124	2.8588e-06	0.00133634	5.58035	ENSMUSG00000047205	Gencode.M18_pc	Dusp18	dual specificity phosphatase 18 [Source:MGI Symbol;Acc:MGI:1922469]	protein_coding	GTATGTTTACCCAGTATGAGTTGAGTTGATGAGTTGATGTGACAACAGCCTTAAGATAGC	Dusp18	dual specificity phosphatase 18	chr11:3800543-3800602	NM_173745	75219	DUSP18	8.41147	8.64379	8.56451	6.68536	6.65588	6.42238
A_66_P126293	-1.9494	11.1509	-5.58215	0.00160862	0.0258424	-1.07158	ENSMUSG00000020689	Gencode.M18_pc	Itgb3	integrin beta 3 [Source:MGI Symbol;Acc:MGI:96612]	protein_coding	ACTTATGTGTGTGACGAGTGTGGGGAAATGTGTAATTTAAAACTTGTGATGTGTCTCACA	Itgb3	integrin beta 3	chr11:104528625-104528684	NM_016780	16416	ITGB3	12.4124	12.2542	11.7102	10.0282	9.65183	10.8485
A_51_P516133	-1.94711	14.9218	-10.983	4.44754e-05	0.00428111	2.84965	ENSMUSG00000036181	Gencode.M18_pc	Hist1h1c	histone cluster 1, H1c [Source:MGI Symbol;Acc:MGI:1931526]	protein_coding	TACACTTGCTTTGCCTTATTTTGATCAGCATAGTTGTAGATTAACTTTGTTTTGCCTCAG	Hist1h1c	histone cluster 1, H1c	chr13:23832018-23832077	AK216922	50708	HIST1H1C	15.7699	15.8237	16.0926	13.6173	14.0294	14.1981
A_55_P2025523	-1.94662	13.1317	-8.08946	0.000235377	0.00951648	1.05483	ENSMUSG00000031355	Gencode.M18_pc	Arhgap6	Rho GTPase activating protein 6 [Source:MGI Symbol;Acc:MGI:1196332]	protein_coding	GCCATGATGAGTAAAATGTTAAGTAAAGATTTGTTGTCAGCTCTTAGTTTTCATGTTGGC	Arhgap6	Rho GTPase activating protein 6	chrX:165742243-165742302	NM_009707	11856	ARHGAP6	14.0295	14.5801	13.7055	11.9421	12.2124	12.3206
A_55_P2109382	-1.94214	10.2924	-17.4382	3.32841e-06	0.00141987	5.4398	ENSMUSG00000020178	Gencode.M18_pc	Adora2a	adenosine A2a receptor [Source:MGI Symbol;Acc:MGI:99402]	protein_coding	GCTTGTTTGTTTGTTTGTGTTTTATTTTCCCCCTGAGATAAAATAAAATGAGCCACACTG	Adora2a	adenosine A2a receptor	chr10:74797461-74797520	NM_009630	11540	ADORA2A	11.3084	11.3623	11.1197	9.32486	9.17549	9.46361
A_55_P2044554	-1.94083	9.52861	-5.44929	0.00181262	0.027629	-1.20444	ENSMUSG00000034833	Gencode.M18_pc	Tespa1	thymocyte expressed, positive selection associated 1 [Source:MGI Symbol;Acc:MGI:1914846]	protein_coding	CAAACCTGAAGCCATTCAGAGTAAATTTCAGAATCCAAAATATCAGAATTGTCTGGCAAA	Tespa1	thymocyte expressed, positive selection associated 1	chr10:129801092-129801151	AK163027	67596	TESPA1	10.6529	11.0069	9.83728	9.03622	8.3321	8.30626
A_51_P506733	-1.94033	8.6067	-8.7571	0.00015362	0.00778329	1.52054	ENSMUSG00000029468	Gencode.M18_pc	P2rx7	purinergic receptor P2X, ligand-gated ion channel, 7 [Source:MGI Symbol;Acc:MGI:1339957]	protein_coding	TTTCGGCACTGGAGGAAAATTTGACATCATCCAGCTGGTTGTATACATTGGATCCACCCT	P2rx7	purinergic receptor P2X, ligand-gated ion channel, 7	chr5:123120528-123123413	NM_001038845	18439	P2RX7	9.36211	10.0801	9.28835	7.59418	7.60491	7.71052
A_51_P490023	-1.93814	14.2427	-5.62887	0.00154323	0.0252818	-1.0254	ENSMUSG00000058672	Agilent eArray	Tubb2a	tubulin, beta 2A class IIA	protein_coding	CTTAGTGAACTTCTGTTGTCCTCCAGCATTGGTCTTTCTATTTGTAAATTATGGTGCTCA	Tubb2a	tubulin, beta 2A class IIA	chr13:34166145-34166116	NM_009450	22151	TUBB2A	15.0759	15.5306	15.0287	12.635	13.257	13.9288
A_55_P2070976	-1.93811	11.6024	-5.70699	0.00144061	0.0243538	-0.948844	ENSMUSG00000082757	Gencode M18	Gm6923	predicted pseudogene 6923 [Source:MGI Symbol;Acc:MGI:3647357]	processed_pseudogene	GACACCTATGCCACTTACTCTGGGACCTTGGTGATTATGGGAATGGGCTCTGAGATAATC	NA	NA	chrX:18498047-18498106	NA	NA	GM6923	12.6666	13.1732	11.8746	10.5021	10.4984	10.8996
A_55_P1954758	-1.93791	10.2223	-6.52251	0.000730632	0.017176	-0.194545	ENSMUSG00000036158	Gencode.M18_pc	Prickle1	prickle planar cell polarity protein 1 [Source:MGI Symbol;Acc:MGI:1916034]	protein_coding	TAAAGGTCCCGGTGTCACCCTGGGCTTTTCAGGGAGGTGTTTAATAAAGGCTTAATAAAC	Prickle1	prickle planar cell polarity protein 1	chr15:93329605-93329546	NM_001033217	106042	PRICKLE1	10.8507	11.8755	10.8475	9.37285	9.14084	9.24635
A_51_P261164	-1.93602	9.68309	-5.87495	0.00124539	0.0226369	-0.786879	ENSMUSG00000021675	Agilent eArray	F2rl2	coagulation factor II (thrombin) receptor-like 2	protein_coding	ATTAGCAGTATTCCGATGGCAATGGACGCATTTCTATTTGCCTTCCTGATTCTCCAAGCT	F2rl2	coagulation factor II (thrombin) receptor-like 2	chr13:96471885-96471944	NM_010170	14064	F2RL2	10.8299	11.1845	9.93892	8.67734	8.53509	8.93283
A_55_P2015495	-1.93413	7.2861	-4.48222	0.00462369	0.0473693	-2.24561	ENSMUSG00000057880	Gencode.M18_pc	Abat	4-aminobutyrate aminotransferase [Source:MGI Symbol;Acc:MGI:2443582]	protein_coding	GGTGACCACGTGAACAGTTCCATGAATTAAATGTTTCCTGTGTTAATCAGTATTCTTAAA	Abat	4-aminobutyrate aminotransferase	chr16:8621576-8621635	NM_172961	268860	ABAT	7.86751	9.08788	7.80412	5.78476	6.36255	6.8098
A_55_P2025225	-1.93282	8.89941	-5.71645	0.00142871	0.0242646	-0.93962	ENSMUSG00000040009	Gencode.M18_pc	Gnaz	guanine nucleotide binding protein, alpha z subunit [Source:MGI Symbol;Acc:MGI:95780]	protein_coding	TCATCTGCCCGTCACACCAGCCCACGTTTGAGCATCCCTCGTTGTGACCATTCTGTTTGG	Gnaz	guanine nucleotide binding protein, alpha z subunit	chr10:74454041-74454100	NM_010311	14687	GNAZ	10.2522	10.2618	9.08352	7.90102	7.81711	8.08089
A_51_P141071	-1.93245	9.13541	-4.45142	0.00477357	0.0484067	-2.28101	ENSMUSG00000030319	Gencode.M18_pc	Cand2	cullin-associated and neddylation-dissociated 2 (putative) [Source:MGI Symbol;Acc:MGI:1914338]	protein_coding	TAGTGCCTCATTAGTTAGCAGAGTGAGAACTGTTTACAGGGAAGATAGTGTGGCTCATTG	Cand2	cullin-associated and neddylation-dissociated 2 (putative)	chr6:115754227-115754286	NM_025958	67088	CAND2	10.2332	10.8535	9.21819	7.96939	7.97594	8.56222
A_52_P10017	-1.92616	12.6971	-12.744	1.94553e-05	0.00293662	3.70948	ENSMUSG00000043252	Gencode.M18_pc	Tmem64	transmembrane protein 64 [Source:MGI Symbol;Acc:MGI:2140359]	protein_coding	CTTAGGACTTAGCATACAATAATCCAACATGATTCGTATGGCGTGCACTCATTTATCAGC	Tmem64	transmembrane protein 64	chr4:15211620-15211679	NM_181401	100201	TMEM64	13.5115	13.8934	13.5756	11.9591	11.574	11.6689
A_55_P1985985	-1.92321	6.71767	-4.75536	0.00350461	0.0403948	-1.93786	ENSMUSG00000018914	Agilent eArray	Il3	interleukin 3	protein_coding	ATTCCAAGGAAGACTGGGGCCATGTTCATTTGTCCCTTGTGGAAATAAATAACTTTGAAC	Il3	interleukin 3	chr11:54078646-54078587	NM_010556	16187	IL3	7.29753	7.11211	8.62818	5.67605	5.83002	5.76214
A_51_P361220	-1.92171	9.10133	-6.19595	0.000950935	0.0196737	-0.487056	ENSMUSG00000049791	Gencode.M18_pc	Fzd4	frizzled class receptor 4 [Source:MGI Symbol;Acc:MGI:108520]	protein_coding	ACACACGTAAGGTATCCAGTGGATTTCTCTCTCCTGAAATTTCAACATCCCTAATTCTAG	Fzd4	frizzled class receptor 4	chr7:96557478-96557537	NM_008055	14366	FZD4	9.76301	9.65297	10.7706	8.17597	8.25898	7.98648
A_52_P559748	-1.9216	7.53926	-4.9951	0.00277115	0.0352615	-1.67677	ENSMUSG00000069303	Gencode.M18_pc	Hist1h2br	histone cluster 1 H2br [Source:MGI Symbol;Acc:MGI:3710645]	protein_coding	AAGGCTCTGTACTAAAGAACATTTTTATGATTCTGTGAGGTGATTATAACTTGTCTCAGC	Hist1h2bq	histone cluster 1, H2bq	chr13:21929214-21929273	NM_001097979	665596	HIST1H2BR	8.87077	7.76022	8.86918	6.0588	6.74056	6.93603
A_51_P488991	-1.92078	10.428	-5.22787	0.00222217	0.0312198	-1.43113	ENSMUSG00000032014	Gencode.M18_pc	Oaf	out at first homolog [Source:MGI Symbol;Acc:MGI:94852]	protein_coding	AACTTGAATTCCAGATTTTTAATGCAAAATATTTATCATTTGTACCAGAAATAAAAGTCT	Oaf	out at first homolog	chr9:43030061-43030002	NM_178644	102644	OAF	11.4322	11.962	10.771	9.75214	8.93845	9.71225
A_55_P1956718	-1.9187	14.089	-5.05483	0.0026168	0.0343215	-1.61301	ENSMUSG00000030559	Gencode.M18_pc	Rab38	RAB38, member RAS oncogene family [Source:MGI Symbol;Acc:MGI:1919683]	protein_coding	CTCTGACTCAAGCTGCAGGACTCTTCTGTATGTGGAAGATATATTATATATATTTTTCAC	Rab38	RAB38, member RAS oncogene family	chr7:95639879-95639938	NM_028238	72433	RAB38	14.9002	15.7817	14.4631	13.5832	12.9217	12.884
A_51_P429212	-1.91675	13.5287	-15.8641	5.68366e-06	0.00164311	4.93354	ENSMUSG00000042684	Gencode.M18_pc	Npl	N-acetylneuraminate pyruvate lyase [Source:MGI Symbol;Acc:MGI:1921341]	protein_coding	TTATCAACTATGTGATCAAGCTAGGTTTTGGAGTGTCGCAAACCAAAGCCATCATGACGC	Npl	N-acetylneuraminate pyruvate lyase	chr1:155356265-155350652	NM_028749	74091	NPL	14.5092	14.283	14.669	12.5125	12.6788	12.5195
A_55_P2027421	-1.91287	6.15087	-6.23238	0.000922895	0.0193926	-0.453813	ENSMUSG00000015484	Gencode.M18_pc	Fam163a	family with sequence similarity 163, member A [Source:MGI Symbol;Acc:MGI:3618859]	protein_coding	GTCTTGTTGTATCTTTGATAACTTGGAACACAAACCAAGCGAATGTCAAAATAAAGGAGA	Fam163a	family with sequence similarity 163, member A	chr1:157923165-157923106	NM_177838	329274	FAM163A	7.19484	7.63656	6.49052	4.92393	5.2935	5.36588
A_55_P2032538	-1.9128	13.0527	-15.8025	5.80991e-06	0.00164311	4.91238	ENSMUSG00000030671	Gencode.M18_pc	Pde3b	phosphodiesterase 3B, cGMP-inhibited [Source:MGI Symbol;Acc:MGI:1333863]	protein_coding	CACTTTTGCTACCACAACTACATCATTTGTAAACTGGTCCCACCATATATTACTAAGTAA	Pde3b	phosphodiesterase 3B, cGMP-inhibited	chr7:121681370-121681429	NM_011055	18576	PDE3B	14.0996	14.156	13.7717	12.0371	12.1574	12.0945
A_55_P1994769	-1.90797	7.38302	-9.84134	8.13757e-05	0.00560684	2.20691	ENSMUSG00000073008	Gencode.M18_pc	Gpr174	G protein-coupled receptor 174 [Source:MGI Symbol;Acc:MGI:2685222]	protein_coding	CACAATGGATTTCTGTGGTTATGTATACAAAGCTGAGGCATAAATACAGCCAGGTTTTTT	Gpr174	G protein-coupled receptor 174	chrX:104487705-104487764	NM_001177781	213439	GPR174	8.30736	8.64187	8.0618	6.67824	6.18445	6.42442
A_55_P2004452	-1.90526	11.3956	-7.93138	0.000261559	0.0101304	0.939223	ENSMUSG00000051579	Gencode.M18_pc	Tceal8	transcription elongation factor A (SII)-like 8 [Source:MGI Symbol;Acc:MGI:1913934]	protein_coding	TCTTTTGAGCGCGACATAAATCGAGGTGCAAGAAGAGAGGAAAATCTCCAGGTACCTACA	Tceal8	transcription elongation factor A (SII)-like 8	chrX:132706235-132706176	NM_025703	66684	TCEAL8	12.1657	12.8016	12.0775	10.1235	10.6078	10.5977
A_55_P2047310	-1.90491	9.12348	-6.7387	0.000617166	0.0158286	-0.00748828	ENSMUSG00000000489	Gencode.M18_pc	Pdgfb	platelet derived growth factor, B polypeptide [Source:MGI Symbol;Acc:MGI:97528]	protein_coding	GTTCCTTCTGCTTCCTTCAGTTTGTAAAGTTGGTGATTATATTTTTGGGGGCTTTCTTTT	Pdgfb	platelet derived growth factor, B polypeptide	chr15:79826435-79826376	NM_011057	18591	PDGFB	9.99161	10.594	9.64215	7.89862	8.10463	8.50983
A_55_P2037692	-1.90288	7.06553	-4.66956	0.00381905	0.0421925	-2.03333	ENSMUSG00000075286	Gencode M18	Gm1968	predicted gene 1968 [Source:MGI Symbol;Acc:MGI:3584525]	lincRNA	CACAATGCCCAGCAACCTGGTTGAAACAAAACTCCAGAAACTTATAATTAATCAATTAGA	Gm1968	predicted gene 1968	chr16:29958109-29958050	NR_037689	328657	GM1968	7.7472	8.91112	7.39259	5.81881	6.19683	6.32662
A_55_P2039284	-1.90047	6.9854	-13.1225	1.65186e-05	0.00265957	3.87644	ENSMUSG00000004951	Gencode.M18_pc	Hspb1	heat shock protein 1 [Source:MGI Symbol;Acc:MGI:96240]	protein_coding	GCTCTTTTGATACATACATTTACCTGCTGTTTTTCTCAAATAAAAGTTGCAAGCTACTGC	Hspb1	heat shock protein 1	chr5:136365366-136365425	NM_013560	15507	HSPB1	7.98255	7.89116	7.93319	5.76737	6.30369	6.03444
A_55_P1987590	-1.89991	8.71246	-7.72996	0.000299974	0.0109215	0.788755	ENSMUSG00000107705	Gencode.M18_pc	Gm45062	predicted gene 45062 [Source:MGI Symbol;Acc:MGI:5753638]	protein_coding	TTTGCAGGGAAATTATAGCAAGCACAGGCTTTGAGGCTTCCCTTGTTCTTCAATGTCTGC	Glcci1	glucocorticoid induced transcript 1	chr6:8545916-8545975	NM_133236	170772	GM45062	9.50806	10.1506	9.32855	8.01386	7.53619	7.73747
A_55_P2159710	-1.89892	10.8481	-10.3537	6.15873e-05	0.00505016	2.50467	ENSMUSG00000026836	Gencode.M18_pc	Acvr1	activin A receptor, type 1 [Source:MGI Symbol;Acc:MGI:87911]	protein_coding	ACGCTGTGGGGGGAAATGCATCTTCTTCGGAATTATCCATTACGTGCATTTAAACTCTGC	Acvr1	activin A receptor, type 1	chr2:58298996-58298937	NM_001110204	11477	ACVR1	11.6268	11.8576	11.9085	9.62058	10.2572	9.81829
A_55_P1974019	-1.89454	10.9071	-8.28205	0.000207483	0.00896662	1.19285	ENSMUSG00000021559	Gencode.M18_pc	Dapk1	death associated protein kinase 1 [Source:MGI Symbol;Acc:MGI:1916885]	protein_coding	CTGTCCTGAGAAGCATGTCATGTTACCATATCATCTGTACATATATATATGCACTATGTA	Dapk1	death associated protein kinase 1	chr13:60864370-60864429	NM_029653	69635	DAPK1	11.945	12.0513	11.5667	9.52169	10.1543	10.2034
A_55_P2136880	-1.89392	12.1436	-9.60269	9.3071e-05	0.0059546	2.06266	ENSMUSG00000040435	Gencode.M18_pc	Ppp1r15a	protein phosphatase 1, regulatory subunit 15A [Source:MGI Symbol;Acc:MGI:1927072]	protein_coding	GAGGGAGGCGGGGCTAAGCCTGAGTAGTTTCCTATTATTTATTTATTTATTTATTTGAAT	Ppp1r15a	protein phosphatase 1, regulatory (inhibitor) subunit 15A	chr7:52778379-52778320	NM_008654	17872	PPP1R15A	13.193	12.6607	13.4182	11.2047	11.1845	11.2008
A_51_P425847	-1.889	10.7529	-7.86436	0.000273671	0.0102629	0.889554	ENSMUSG00000079685	Gencode.M18_pc	Ulbp1	UL16 binding protein 1 [Source:MGI Symbol;Acc:MGI:1925027]	protein_coding	ATATTCCTGAGGGGGATATGGGAGCTTTTAATACGAGTTACAAGATATTATTTATCCTTC	Ulbp1	UL16 binding protein 1	chrUn_random:3074042-3074101	AK084712	77777	ULBP1	11.6118	12.0502	11.4303	9.58871	10.2262	9.61038
A_55_P1969367	-1.88878	6.60168	-5.5544	0.00164895	0.0261536	-1.09913	ENSMUSG00000031274	Gencode.M18_pc	Col4a5	collagen, type IV, alpha 5 [Source:MGI Symbol;Acc:MGI:88456]	protein_coding	GACAGTATTTGCTTAGTCTTCTCCCTTCAATTAGAAAAAGCCAATGGACTTTTAAAACCT	Col4a5	collagen, type IV, alpha 5	chrX:138123547-138123606	NM_001163155	12830	COL4A5	7.08488	8.32975	7.22358	5.50953	5.69869	5.76364
A_51_P144349	-1.88531	12.8428	-12.5489	2.12059e-05	0.00306057	3.62111	ENSMUSG00000039982	Gencode.M18_pc	Dtx4	deltex 4, E3 ubiquitin ligase [Source:MGI Symbol;Acc:MGI:2672905]	protein_coding	ACTTATATCTCAGTGGGGGTTTCTGGGAGAGGGCTGGTGAATGTCCAGATGTCAGGTGTT	Dtx4	deltex 4, E3 ubiquitin ligase	chr19:12540994-12540935	NM_172442	207521	DTX4	13.964	13.672	13.7203	11.91	12.1326	11.6579
A_51_P276479	-1.88203	9.77681	-14.0955	1.10609e-05	0.0022016	4.28057	ENSMUSG00000050345	Gencode.M18_pc	4930486L24Rik	RIKEN cDNA 4930486L24 gene [Source:MGI Symbol;Acc:MGI:1922258]	protein_coding	CATGAAGGGATACATAAAGATTGCCAAAGACTGGAACAACCACTGCGGGATTGCTACACT	4930486L24Rik	RIKEN cDNA 4930486L24 gene	chr13:60944319-60944260	NM_178098	214639	4930486L24RIK	10.5025	10.9563	10.6947	8.7396	8.84415	8.92363
A_55_P1986828	-1.88185	6.92636	-5.39789	0.00189937	0.0283621	-1.25646	ENSMUSG00000060621	Gencode.M18_pc	Nkpd1	NTPase, KAP family P-loop domain containing 1 [Source:MGI Symbol;Acc:MGI:1916797]	protein_coding	AGTCCTTAAATTTCAGGAGCGTAGAGGCTGTTTGGGTGTGGGATGGAGAACACCAGCCAC	Nkpd1	NTPase, KAP family P-loop domain containing 1	chr7:20110124-20110183	NM_027116	69547	NKPD1	7.53809	8.68271	7.38105	6.01855	5.91706	6.02068
A_55_P2019457	-1.87999	7.41221	-7.11147	0.00046598	0.0136464	0.303362	ENSMUSG00000004267	Gencode.M18_pc	Eno2	enolase 2, gamma neuronal [Source:MGI Symbol;Acc:MGI:95394]	protein_coding	CCACAGTTGCCACCATCTCCGTGGCTTTGAAATGACCACCACCATTAAAGTCTGAATCAC	Eno2	enolase 2, gamma neuronal	chr6:124710447-124710388	NM_013509	13807	ENO2	8.91696	7.86433	8.27533	6.43034	6.54324	6.44307
A_55_P2015292	-1.87962	12.7391	-6.63679	0.000667908	0.016489	-0.0950317	ENSMUSG00000020377	Gencode.M18_pc	Ltc4s	leukotriene C4 synthase [Source:MGI Symbol;Acc:MGI:107498]	protein_coding	CAAAACGCTGGGGTGCCCGCCCCCGAATCCCAGTTTTTAATTAAAGTTCCCACGACGGTT	Ltc4s	leukotriene C4 synthase	chr11:50050031-50049972	NM_008521	17001	LTC4S	13.7053	13.7125	13.619	11.7898	12.376	11.2322
A_55_P2017561	-1.87923	8.30265	-18.5372	2.35351e-06	0.00123563	5.75781	ENSMUSG00000079450	Gencode.M18_pc	Cldn34c1	claudin 34C1 [Source:MGI Symbol;Acc:MGI:1920311]	protein_coding	GCAGAGCCATGGGATTGGCATACATATCTGCCATATTGTTTTTATTAAGTGCTATAATTT	Cldn34c1	claudin 34C1	chrX:120256770-120256829	NM_028426	73061	CLDN34C1	9.09118	9.31083	9.32478	7.48205	7.30629	7.30078
A_51_P269792	-1.87823	10.7989	-7.00224	0.000505331	0.0142571	0.21376	ENSMUSG00000059060	Gencode.M18_pc	Rad51b	RAD51 paralog B [Source:MGI Symbol;Acc:MGI:1099436]	protein_coding	GGACTGCGCTGCTTGGAAAAAGGAAACGGAAGCCAACATAATGAGGATTAATTGGTTGGT	Rad51b	RAD51 paralog B	chr12:80915000-80915059	NM_009014	19363	RAD51B	11.9696	11.2192	12.0254	9.94599	10.1099	9.5236
A_51_P218774	-1.87777	15.0819	-8.04237	0.000242843	0.00972071	1.02062	ENSMUSG00000030844	Gencode.M18_pc	Rgs10	regulator of G-protein signalling 10 [Source:MGI Symbol;Acc:MGI:1915115]	protein_coding	GACCTTCCCTCTGGATATGTGTATTTTATTAACTGAACAGCAACCTCTGCATGATGCTAA	Rgs10	regulator of G-protein signalling 10	chr7:135517315-135517256	NM_026418	67865	RGS10	15.9885	16.4332	15.6407	13.8641	14.2302	14.3347
A_52_P964651	-1.87166	6.95351	-4.4505	0.00477814	0.0484075	-2.28207	ENSMUSG00000074577	Gencode.M18_pc	Ripor3	RIPOR family member 3 [Source:MGI Symbol;Acc:MGI:1916803]	protein_coding	GCTTTCGAGAAGATGGACAAACTCCACTCGGAACAAGAGGCCTTCTGTCAGGAAGCGGAC	Ripor3	RIPOR family member 3	chr2:167806403-167806344	NM_001080708	69553	RIPOR3	7.94232	8.6974	7.02831	5.86076	5.92213	6.27014
A_51_P185593	-1.8626	6.80414	-5.19905	0.0022829	0.031698	-1.46113	ENSMUSG00000030554	Gencode.M18_pc	Synm	synemin, intermediate filament protein [Source:MGI Symbol;Acc:MGI:2661187]	protein_coding	AGTTCCTCCTGAGATCAGAACTTTTCCCTATAGGTTCAAACTAGGAAGCATGCACTAACT	Synm	synemin, intermediate filament protein	chr7:74875424-74875365	NM_201639	233335	SYNM	7.71205	8.42653	7.06776	5.57169	5.9352	6.11163
A_55_P2251141	-1.85887	6.07299	-8.60952	0.000168393	0.00817645	1.42062	ENSMUSG00000105437	Gencode M18	Gm42450	predicted gene 42450 [Source:MGI Symbol;Acc:MGI:5662587]	lincRNA	GGAGAGGTGAATATGGTCAAATCACAGTGCATAAAATCCTCAAAGAACAATAAAACTGAT	A230098N10Rik	RIKEN cDNA A230098N10 gene	chr5:30213346-30213287	AK039125	97209	GM42450	6.95978	6.61689	7.43061	5.15813	5.2693	5.00323
A_55_P2156490	-1.85736	7.93236	-8.28782	0.000206709	0.00895722	1.19694	NA	Agilent eArray	Gm3146	predicted gene 3146	NA	CACTGTCTTTGAGTCATTTCTGTTCCTGTAAGTAATACCAATAAAACTCACTAGCTCACC	Gm3146	predicted gene 3146	chr2:29981790-29981849	AK046897	100041114	GM3146	8.5324	9.31309	8.73765	6.78443	7.0911	7.13551
A_55_P1991016	-1.85704	12.9445	-11.5315	3.39508e-05	0.00371572	3.13321	ENSMUSG00000045763	Gencode.M18_pc	Basp1	brain abundant, membrane attached signal protein 1 [Source:MGI Symbol;Acc:MGI:1917600]	protein_coding	AGCGACGCGGCCCCGGCGGCTTCAGACTCTAAACCTAGCAGCGCGGAGCCCGCGCCCTCG	Basp1	brain abundant, membrane attached signal protein 1	chr15:25294187-25294128	NM_027395	70350	BASP1	13.8073	13.8187	13.9931	11.6866	12.1241	12.2372
A_52_P476029	-1.85681	10.6738	-7.81051	0.000283874	0.0105581	0.849363	ENSMUSG00000061411	Gencode.M18_pc	Nol4l	nucleolar protein 4-like [Source:MGI Symbol;Acc:MGI:1918765]	protein_coding	GTCATAAGTATGTGGAATCCTTTTCCTTTTGAGACTGTATATCATATACCAGACTGAATC	Nol4l	nucleolar protein 4-like	chr2:153233286-153233227	NM_001001986	329540	NOL4L	11.3764	12.0792	11.351	9.51037	9.73919	9.98661
A_51_P167048	-1.85524	8.54824	-5.21318	0.00225289	0.0314988	-1.44641	ENSMUSG00000045216	Gencode.M18_pc	Hs6st1	heparan sulfate 6-O-sulfotransferase 1 [Source:MGI Symbol;Acc:MGI:1354958]	protein_coding	GTACATGACCTGAACATAGGATCTGTTCTATACATACTGGAATATGTTTTAACATATGCC	Hs6st1	heparan sulfate 6-O-sulfotransferase 1	chr1:36162666-36162725	NM_015818	50785	HS6ST1	8.93266	10.301	9.19395	7.56133	7.63988	7.66066
A_51_P125842	-1.85175	13.2163	-9.27304	0.000112603	0.00656868	1.85725	ENSMUSG00000040616	Gencode.M18_pc	Tmem51	transmembrane protein 51 [Source:MGI Symbol;Acc:MGI:2384874]	protein_coding	CCCCAAGTGCTGCTGGTTCTTTGAAGGTCTAAGGCCTGATGACCTTCAGCGTGCGACACA	Tmem51	transmembrane protein 51	chr4:141587097-141587038	NM_145402	214359	TMEM51	14.2139	14.4085	13.8041	12.3534	12.0192	12.4987
A_51_P261560	-1.85083	7.9284	-5.43273	0.00184005	0.027869	-1.22115	ENSMUSG00000062154	Gencode.M18_pc	Tex33	testis expressed 33 [Source:MGI Symbol;Acc:MGI:1920626]	protein_coding	GAGGAAGACGGATGACCTGGGCCGGTGGCACCGGAAGAATGCTATGAACATGAACTTGCA	Tex33	testis expressed 33	chr15:78209193-78208951	NM_001163612	73376	TEX33	8.49685	9.61402	8.45057	6.84288	6.90549	7.26057
A_51_P362738	-1.84765	7.18158	-9.53343	9.68241e-05	0.00603999	2.02011	ENSMUSG00000047205	Gencode.M18_pc	Dusp18	dual specificity phosphatase 18 [Source:MGI Symbol;Acc:MGI:1922469]	protein_coding	TTTTTTAACAAAGAACTTTATTTGAGCCTTTTTGTCATTAAAAGAAAACATTTGGAGGTG	Dusp18	dual specificity phosphatase 18	chr11:3799075-3799134	NM_173745	75219	DUSP18	7.90909	8.48705	7.92008	6.28373	6.43416	6.05539
A_51_P155152	-1.84752	11.384	-11.3576	3.69368e-05	0.0038729	3.04496	ENSMUSG00000022265	Gencode.M18_pc	Ank	progressive ankylosis [Source:MGI Symbol;Acc:MGI:3045421]	protein_coding	TGCATTGGAAATCCACTTAGTGCAGTATATTTTTCTAAGTTTTGGAAAGCGGGTTTTTTC	Ank	progressive ankylosis	chr15:27523965-27524024	NM_020332	11732	ANK	12.3072	12.5574	12.0587	10.2511	10.5128	10.6168
A_55_P2033278	-1.84423	6.49147	-6.81618	0.000581559	0.0154033	0.0583166	ENSMUSG00000091827	Gencode.M18_pc	Speer4f2	spermatogenesis associated glutamate (E)-rich protein 4f2 [Source:MGI Symbol;Acc:MGI:3781672]	protein_coding	ATGGCTGATTCAGGGTGTTGTTCCCTTTTCTCTTCAGACAACTCCTCTTGACAGAGAACT	Speer5-ps1	spermatogenesis associated glutamate (E)-rich protein 5, pseudogene 1	chr10:43939023-43939082	NR_001582	70365	SPEER4F2	7.17834	8.02868	7.03372	5.68824	5.50637	5.51345
A_52_P137765	-1.84397	13.9053	-13.9389	1.17769e-05	0.00229976	4.21786	ENSMUSG00000028063	Gencode.M18_pc	Lmna	lamin A [Source:MGI Symbol;Acc:MGI:96794]	protein_coding	CAAGCTGGTGCGCTCACTGACCATGGTTGAGGACAATGAGGATGACGACGAGGATGGAGA	Lmna	lamin A	chr3:88287321-88287262	NM_019390	16905	LMNA	15.0116	14.7751	14.6951	12.7987	13.1553	12.996
A_52_P487615	-1.84374	13.6149	-8.03909	0.000243375	0.009726	1.01823	ENSMUSG00000056069	Gencode.M18_pc	Otulinl	OTU deubiquitinase with linear linkage specificity like [Source:MGI Symbol;Acc:MGI:2687281]	protein_coding	CGGGTATTCTCTTCAAGTAAAGATAAAAGTGTTTCGACTGTTCAAGTTTAACTCCAGAGA	Fam105a	family with sequence similarity 105, member A	chr15:27586809-27586750	NM_198301	223433	OTULINL	14.5482	14.9057	14.1565	12.4069	12.9298	12.7426
A_51_P268234	-1.84336	7.08077	-10.3983	6.01456e-05	0.00501087	2.52988	ENSMUSG00000031750	Gencode.M18_pc	Il34	interleukin 34 [Source:MGI Symbol;Acc:MGI:1923777]	protein_coding	AAGAACGACGGGGTGCCTCCTAGGATCCCAGGACTTACTGGGGCTTTTCAGTTGTGCTGA	Il34	interleukin 34	chr8:113265894-113265835	NM_029646	76527	IL34	7.80254	7.86966	8.33517	6.04492	6.05736	6.37498
A_66_P133269	-1.84335	7.63982	-7.91109	0.00026516	0.010154	0.924222	ENSMUSG00000040726	Gencode.M18_pc	Hesx1	homeobox gene expressed in ES cells [Source:MGI Symbol;Acc:MGI:96071]	protein_coding	CATGTTGGCTTCTCTTCCAGTTGTATAGTACAGAAGAAATCAATGGAAATTCCAAGTACT	Hesx1	homeobox gene expressed in ES cells	chr14:27815304-27815363	NM_010420	15209	HESX1	8.22303	9.05871	8.40274	6.87213	6.5597	6.72259
A_52_P73126	-1.84154	5.97098	-7.52061	0.000347014	0.0118037	0.628502	ENSMUSG00000023216	Gencode.M18_pc	Epb42	erythrocyte membrane protein band 4.2 [Source:MGI Symbol;Acc:MGI:95402]	protein_coding	TAACATAGGACCTGAAAGAATAGACTAAACTTATCTATAGCTAGATCTTCATGAGTGCTG	Epb42	erythrocyte membrane protein band 4.2	chr2:120844499-120844440	NM_013513	13828	EPB42	6.61558	6.65468	7.40499	4.89671	4.96334	5.29058
A_55_P2100149	-1.84059	8.47998	-8.67651	0.000161491	0.00804667	1.46619	ENSMUSG00000018411	Gencode.M18_pc	Mapt	microtubule-associated protein tau [Source:MGI Symbol;Acc:MGI:97180]	protein_coding	TTGTGATCAGGCTCCCAGGGCAGTCAATAATCATGGAGAGAAGAGAGAGTGAGAGTGTGG	Mapt	microtubule-associated protein tau	chr11:104189496-104189555	NM_001285455	17762	MAPT	9.07371	9.50291	9.62419	7.68022	7.21093	7.7879
A_55_P1972448	-1.83575	10.2897	-7.68182	0.0003101	0.0110786	0.75226	ENSMUSG00000111201	Gencode M18	Gm47178	predicted gene, 47178 [Source:MGI Symbol;Acc:MGI:6095964]	processed_pseudogene	AACGAAGGAACACCCAAGAACACACAAAAGCAGATGAAGGCCATCCTTCAAGAAGATCCA	NA	NA	chr9:56391584-56391643	NA	NA	GM47178	10.8374	11.6608	11.1246	9.10023	9.51558	9.49973
A_55_P1969027	-1.83528	8.27928	-8.56028	0.000173685	0.00832075	1.38691	ENSMUSG00000020599	Gencode.M18_pc	Rgs9	regulator of G-protein signaling 9 [Source:MGI Symbol;Acc:MGI:1338824]	protein_coding	CAATGTGTTAGACTACGGCCTGGACCGCGTGACCAATCCAAACGAAGTTAAGGTAAACCA	Rgs9	regulator of G-protein signaling 9	chr11:109121201-109121142	AK166518	19739	RGS9	9.1174	9.65639	8.81697	7.37691	7.38348	7.32454
A_51_P455647	-1.8329	14.2545	-7.49017	0.000354544	0.0119868	0.604862	ENSMUSG00000027562	Gencode.M18_pc	Car2	carbonic anhydrase 2 [Source:MGI Symbol;Acc:MGI:88269]	protein_coding	CCTCTCATCCGTTGTGCTTACTAACAAAATGTGAAAAGCAAGACCCAGGTGTCTCATGTG	Car2	carbonic anhydrase 2	chr3:14900206-14900265	NM_009801	12349	CAR2	14.873	15.2252	15.4146	13.5099	12.8722	13.6321
A_55_P2011565	-1.82975	8.49521	-10.5214	5.63724e-05	0.00488552	2.59875	ENSMUSG00000101585	Gencode M18	1600010M07Rik	RIKEN cDNA 1600010M07 gene [Source:MGI Symbol;Acc:MGI:1917031]	antisense	TAAGAAGGAGATTACCTAGGGTAGAGCCTTCTGACCTTGATGGCTCTATTTGCTCTTCTC	1600010M07Rik	RIKEN cDNA 1600010M07 gene	chr7:117142139-117142080	NR_037959	69781	1600010M07RIK	9.50945	9.52532	9.19547	7.3975	7.4386	7.90491
A_55_P2092296	-1.82918	9.40012	-5.31398	0.00205144	0.0298576	-1.34217	ENSMUSG00000041556	Gencode.M18_pc	Fbxo2	F-box protein 2 [Source:MGI Symbol;Acc:MGI:2446216]	protein_coding	GGATCCCGCGCTCCTAGCATTGTGCCTGCCTCAAAGTGGGCACTCAATAAATATTTGTCC	Fbxo2	F-box protein 2	chr4:147540456-147540515	NM_176848	230904	FBXO2	10.1614	10.7903	9.99237	8.13801	8.18202	9.13657
A_55_P2052929	-1.82838	6.62559	-4.94639	0.00290478	0.0362482	-1.72915	ENSMUSG00000030345	Gencode.M18_pc	Dyrk4	dual-specificity tyrosine-(Y)-phosphorylation regulated kinase 4 [Source:MGI Symbol;Acc:MGI:1330292]	protein_coding	CGCCACCAATTTGTATTAGAGAAGGCACTTTGATTGTACAATACTTCACATTGCTTTTTT	Dyrk4	dual-specificity tyrosine-(Y)-phosphorylation regulated kinase 4	chr6:126826304-126826245	NM_207210	101320	DYRK4	6.72978	7.90033	7.98924	5.47462	6.02332	5.63627
A_55_P2106645	-1.82833	6.13899	-4.48262	0.00462175	0.0473628	-2.24515	ENSMUSG00000022840	Gencode.M18_pc	Adcy5	adenylate cyclase 5 [Source:MGI Symbol;Acc:MGI:99673]	protein_coding	GGAGGTGGGAACCCCAACTTGTCTTTTTGTATTTTTTATTTTGTATTATTGAAACCTTGG	Adcy5	adenylate cyclase 5	chr16:35304551-35304610	NM_001012765	224129	ADCY5	7.27132	7.75586	6.13229	5.23377	5.13557	5.30513
A_55_P1995404	-1.82642	6.4613	-5.55943	0.00164156	0.0260937	-1.09413	ENSMUSG00000068686	Gencode.M18_pc	Cd59b	CD59b antigen [Source:MGI Symbol;Acc:MGI:1888996]	protein_coding	CTGCTACTGCAGCACTCTAAAGCCTTTATTATTTTCCAGCTGTATTAATTTAGGAAAGAA	Cd59b	CD59b antigen	chr2:103924849-103924908	NM_181858	333883	CD59B	7.15068	8.12271	6.85015	5.48483	5.64414	5.51531
A_55_P2071952	-1.8262	12.9565	-9.59033	9.37284e-05	0.00595685	2.05509	ENSMUSG00000109916	Gencode M18	Gm45551	predicted gene 45551 [Source:MGI Symbol;Acc:MGI:5791387]	unprocessed_pseudogene	ATGTAAACTTGTACTTTTCCTGCCCAGTTCTCCCCCCTTGAGTTTTACTATATAAGCCTG	Wdr92	WD repeat domain 92	chr11:17134613-17134672	NM_178909	103784	GM45551	14.0679	13.5145	14.0263	12.0435	11.8311	12.2556
A_51_P389864	-1.82505	8.37103	-5.59898	0.0015847	0.0256912	-1.0549	ENSMUSG00000069920	Gencode.M18_pc	B3gnt9	UDP-GlcNAc:betaGal beta-1,3-N-acetylglucosaminyltransferase 9 [Source:MGI Symbol;Acc:MGI:2142841]	protein_coding	CTCATATTCTTCAACTCCAGCTTCAAGGAAATCAACAGCTCACATTTTAGTACAAACAGC	B3gnt9	UDP-GlcNAc:betaGal beta-1,3-N-acetylglucosaminyltransferase 9	chr8:107776997-107776938	NM_178879	97440	B3GNT9	9.11848	9.98623	8.74595	7.25907	7.64475	7.47168
A_55_P2086294	-1.82454	6.9013	-5.81695	0.00130914	0.0232589	-0.842401	ENSMUSG00000074277	Gencode.M18_pc	Phldb3	pleckstrin homology like domain, family B, member 3 [Source:MGI Symbol;Acc:MGI:3642959]	protein_coding	TAGAGGAGGGCTCCTCGTCTCCAAAGGTTTCGGAATGCGCCGTCGAGGTCCAGCCTCAAG	Phldb3	pleckstrin homology like domain, family B, member 3	chr7:25396383-25396442	NM_001102613	232970	PHLDB3	7.88114	8.39212	7.16745	6.14794	5.80459	6.01454
A_51_P248122	-1.82208	11.8278	-15.3601	6.81946e-06	0.00170771	4.75726	ENSMUSG00000002083	Gencode.M18_pc	Bbc3	BCL2 binding component 3 [Source:MGI Symbol;Acc:MGI:2181667]	protein_coding	TGGGAGCGGGGAGGGACGGCCCAGCCTGTAAGATACTGTACATGCACTGCTGTAGATATA	Bbc3	BCL2 binding component 3	chr7:16903403-16903462	NM_133234	170770	BBC3	12.6623	12.7875	12.7668	10.7318	10.8909	11.1277
A_52_P494622	-1.82177	7.82582	-12.391	2.27586e-05	0.00315338	3.5484	ENSMUSG00000026826	Gencode.M18_pc	Nr4a2	nuclear receptor subfamily 4, group A, member 2 [Source:MGI Symbol;Acc:MGI:1352456]	protein_coding	AAAGACCATGTGACTTTCAATAATGGGGGTTTGAACCGACCCAACTACCTGTCTAAACTG	Nr4a2	nuclear receptor subfamily 4, group A, member 2	chr2:56960758-56960699	NM_013613	18227	NR4A2	8.88748	8.82572	8.49692	7.12192	6.83521	6.78767
A_55_P2098805	-1.8168	6.4933	-16.5205	4.51997e-06	0.00155943	5.15244	ENSMUSG00000070469	Gencode.M18_pc	Adamtsl3	ADAMTS-like 3 [Source:MGI Symbol;Acc:MGI:3028499]	protein_coding	CAAACACATCATCACCTGCTGTGCTTTGTAAACCAGCGAAGAATGGTACATCCTGAAGTC	Adamtsl3	ADAMTS-like 3	chr7:89761288-89761347	NM_001190374	269959	ADAMTSL3	7.25378	7.49513	7.45619	5.59545	5.71663	5.4426
A_51_P391716	-1.81607	6.98502	-5.33197	0.0020177	0.0294969	-1.32372	ENSMUSG00000028644	Gencode.M18_pc	Ermap	erythroblast membrane-associated protein [Source:MGI Symbol;Acc:MGI:1349816]	protein_coding	AAATAAATACGAGACTGAAGTTGGCAGGTCAGAGTACTAGAAAGAGACAAGTTTTAGTTG	Ermap	erythroblast membrane-associated protein	chr4:118848599-118848540	NM_013848	27028	ERMAP	8.04772	7.90507	7.72636	5.76511	5.61196	6.85388
A_55_P2003976	-1.81463	6.10725	-11.6971	3.13669e-05	0.00357327	3.21586	ENSMUSG00000096606	Gencode.M18_pc	Tpbgl	trophoblast glycoprotein-like [Source:MGI Symbol;Acc:MGI:3646425]	protein_coding	TCTTCCTCATGGTGCTCTACCTAAACCGCCGCGGCATCCAACGCTGGATGCACAATTTGC	Tpbgl	trophoblast glycoprotein-like	chr7:106774191-106774132	NM_001195529	100503386	TPBGL	7.23222	7.13104	6.68042	5.2014	5.2318	5.16659
A_55_P2016937	-1.81276	6.14171	-4.81138	0.0033152	0.0391566	-1.8761	ENSMUSG00000032503	Gencode.M18_pc	Arpp21	cyclic AMP-regulated phosphoprotein, 21 [Source:MGI Symbol;Acc:MGI:107562]	protein_coding	AGAAACAATAATTACTCACAAAAGCCCCAAACGAAATCCAGTCAGTCAAGGCACCCGGGA	Arpp21	cyclic AMP-regulated phosphoprotein, 21	chr9:112136900-112136841	NM_001177619	74100	ARPP21	6.87806	7.87099	6.39521	5.23481	5.06134	5.40983
A_55_P2073507	-1.81236	8.50085	-5.44517	0.00181939	0.0276778	-1.20859	ENSMUSG00000028536	Gencode.M18_pc	2610528J11Rik	RIKEN cDNA 2610528J11 gene [Source:MGI Symbol;Acc:MGI:1913701]	protein_coding	GCTCCATCTTTGGACACTTCCCTCCATGCCTGGCAGTTTAAAGACAGTGAGTGACTCCTC	2610528J11Rik	RIKEN cDNA 2610528J11 gene	chr4:118202401-118202460	NM_025572	66451	2610528J11RIK	9.0199	10.1542	9.04699	7.42798	7.52906	7.82695
A_55_P2071906	-1.81006	8.38669	-6.98065	0.000513556	0.0143923	0.195908	ENSMUSG00000108589	Gencode M18	Gm45225	predicted gene 45225 [Source:MGI Symbol;Acc:MGI:5753801]	unprocessed_pseudogene	AACACGGAGTTTCATCACCAGAACCTCATTATGTCTGTGCTCGATCTCTTCTTTGCTGGA	NA	NA	chr7:26771212-26771271	NA	NA	GM45225	9.38513	9.42268	9.06735	7.41472	7.03312	7.99715
A_51_P249360	-1.80932	12.8236	-7.12787	0.000460384	0.0135592	0.316708	ENSMUSG00000049858	Gencode.M18_pc	Suox	sulfite oxidase [Source:MGI Symbol;Acc:MGI:2446117]	protein_coding	CCTCTGGGATGCAAGGGGATTTCCCTCTTAGAGTGCTACTTTTAAAACTATTCCAATAAA	Suox	sulfite oxidase	chr10:128107026-128106967	NM_173733	211389	SUOX	13.6217	14.1857	13.3774	12.1676	11.586	12.0032
A_55_P2061620	-1.80774	8.66657	-23.2435	6.49252e-07	0.000665127	6.86084	ENSMUSG00000027221	Gencode.M18_pc	Chst1	carbohydrate (keratan sulfate Gal-6) sulfotransferase 1 [Source:MGI Symbol;Acc:MGI:1924219]	protein_coding	ATCTTAGAAGTTTCTGATTGATCTTGGGGTCCCTCTGTGCTATTTCTTTGTGCCAAAAAA	Chst1	carbohydrate (keratan sulfate Gal-6) sulfotransferase 1	chr2:92455254-92455313	NM_023850	76969	CHST1	9.62596	9.55187	9.53351	7.7209	7.70725	7.85995
A_51_P180140	-1.80701	14.2494	-7.38558	0.000381894	0.0123743	0.522978	ENSMUSG00000050799	Gencode.M18_pc	Hist1h2ba	histone cluster 1, H2ba [Source:MGI Symbol;Acc:MGI:2448375]	protein_coding	CGACACCGGCATCTCCTCCAAGGCCATGAGCATCATGAACTCCTTTGTGACAGACATCTT	Hist1h2ba	histone cluster 1, H2ba	chr13:24025870-24025811	NM_175663	319177	HIST1H2BA	14.6842	15.2081	15.5664	13.1293	13.3545	13.5539
A_55_P1996504	-1.80648	12.5319	-12.4851	2.18179e-05	0.00311171	3.59186	ENSMUSG00000029802	Gencode.M18_pc	Abcg2	ATP binding cassette subfamily G member 2 (Junior blood group) [Source:MGI Symbol;Acc:MGI:1347061]	protein_coding	CCTGGCTTGTATGATTATTATCTTCCTCACAATTGCCTACCTGAAATTGTTGTTTCTTAA	Abcg2	ATP-binding cassette, sub-family G (WHITE), member 2	chr6:58642312-58642371	NM_011920	26357	ABCG2	13.2179	13.3591	13.7285	11.7045	11.59	11.5915
A_55_P2028504	-1.80442	8.1593	-19.2526	1.8981e-06	0.00109203	5.95091	NA	Agilent eArray	Gm14957	predicted gene 14957	NA	CAGTGGAAATCAAAATGTTTCCCCATGTCTGAAAATAAATTTGCAGCATACATAACCTTG	Gm14957	predicted gene 14957	chrX:122736534-122736475	XR_387061	100040410	GM14957	8.93531	9.16274	9.08648	7.21997	7.35882	7.19249
A_52_P42069	-1.80372	7.29295	-5.0211	0.00270272	0.0349161	-1.64895	ENSMUSG00000049409	Gencode.M18_pc	Prokr1	prokineticin receptor 1 [Source:MGI Symbol;Acc:MGI:1929676]	protein_coding	ATTTCCCAGAAAACACATTTCAAAGGACCATTTATGTATTCTTATTCAGCATGCAACAGG	Prokr1	prokineticin receptor 1	chr6:87529154-87529095	NM_021381	58182	PROKR1	7.97259	8.25218	8.35964	5.60715	6.58323	6.98289
A_55_P2019483	-1.80244	9.05203	-5.5588	0.00164247	0.0260937	-1.09475	ENSMUSG00000036564	Gencode.M18_pc	Ndrg4	N-myc downstream regulated gene 4 [Source:MGI Symbol;Acc:MGI:2384590]	protein_coding	GCCTAATTTTGTGTATTCTGTTTGGTGGCTGATAAAGAGACTTTGAGATTACAAAATGCA	Ndrg4	N-myc downstream regulated gene 4	chr8:98238734-98238793	NM_001195006	234593	NDRG4	9.34969	9.89861	10.6115	7.94324	8.18432	8.32489
A_55_P2109122	-1.80047	14.7636	-8.26161	0.000210254	0.00902446	1.17835	ENSMUSG00000018102	Gencode.M18_pc	Hist1h2bc	histone cluster 1, H2bc [Source:MGI Symbol;Acc:MGI:1915274]	protein_coding	GCTGCAAAATTAAGATGCTCCTAGCAAAAGAATGCTTTTAAGTGTTTGTCATGTATGGAT	Hist1h2bc	histone cluster 1, H2bc	chr13:23784254-23784313	NM_023422	68024	HIST1H2BC	15.4004	15.718	15.8733	13.4475	14.0444	14.0983
A_55_P1994128	-1.798	6.17649	-16.684	4.27502e-06	0.00153443	5.2052	ENSMUSG00000036687	Gencode.M18_pc	Tmem184a	transmembrane protein 184a [Source:MGI Symbol;Acc:MGI:2385897]	protein_coding	AGAGTTGCCAGTGCGCCAGCCTACCAGCAACTATCTGCTTATTTATAGATAAACACCTTG	Tmem184a	transmembrane protein 184a	chr5:140280976-140280917	NM_001161548	231832	TMEM184A	7.15032	6.89185	7.18431	5.22306	5.38065	5.22876
A_55_P1958160	-1.79667	10.4831	-7.73473	0.000298991	0.0109076	0.792364	ENSMUSG00000004631	Gencode.M18_pc	Sgce	sarcoglycan, epsilon [Source:MGI Symbol;Acc:MGI:1329042]	protein_coding	GTTATACCTCCCACGCACACAGACAACTACGACAGCACCAACATGCCGTTGATGCAGGCA	Sgce	sarcoglycan, epsilon	chr6:4639643-4639584	NM_001130188	20392	SGCE	10.8766	11.7749	11.4928	9.61736	9.50028	9.6367
A_66_P105074	-1.79559	8.87083	-15.9373	5.53794e-06	0.00164204	4.95851	ENSMUSG00000023960	Gencode.M18_pc	Enpp5	ectonucleotide pyrophosphatase/phosphodiesterase 5 [Source:MGI Symbol;Acc:MGI:1933830]	protein_coding	TCCAGCACTGAAAGGTGAATTCTAAAGATCTTATCTCTATACATTAGTATTGTTCCCTGT	Enpp5	ectonucleotide pyrophosphatase/phosphodiesterase 5	chr17:44223268-44223327	NM_001329619	83965	ENPP5	9.7934	9.92623	9.58623	8.02756	7.86425	8.02729
A_55_P1990866	-1.79201	9.05175	-9.84056	8.14111e-05	0.00560684	2.20645	ENSMUSG00000031698	Gencode.M18_pc	Mylk3	myosin light chain kinase 3 [Source:MGI Symbol;Acc:MGI:2443063]	protein_coding	GCAGATCTGTGAGGGTGTGCATTACCTGCATCAGCACTATATCCTGCACCTGGACCTCAA	Mylk3	myosin light chain kinase 3	chr8:87874322-87874263	NM_175441	213435	MYLK3	9.93751	10.0011	9.9046	8.35761	7.74875	8.36086
A_52_P233441	-1.78991	13.6924	-5.88054	0.00123943	0.0225905	-0.781548	ENSMUSG00000015053	Gencode.M18_pc	Gata2	GATA binding protein 2 [Source:MGI Symbol;Acc:MGI:95662]	protein_coding	AACTGCATAAGCTTAACCCGCTGATGAGTGGTTTTATTTTGAAACTCGTTTTTTGGGTCC	Gata2	GATA binding protein 2	chr6:88156362-88156421	NM_008090	14461	GATA2	14.6769	14.8747	14.2103	13.2268	12.2237	12.9417
A_52_P372013	-1.78988	5.88063	-13.6919	1.30199e-05	0.0024045	4.11717	ENSMUSG00000072623	Gencode.M18_pc	Zfp9	zinc finger protein 9 [Source:MGI Symbol;Acc:MGI:99210]	protein_coding	TGTGACACATGAAGGTTGTACAAAACAAAAGTTCCATATATCTAACTGAAGCACTTTGAG	Zfp9	zinc finger protein 9	chr6:118412437-118412378	NM_011763	22750	ZFP9	6.61562	6.99924	6.71186	4.93356	5.13564	4.88788
A_55_P2008061	-1.78772	13.6863	-6.55314	0.000713175	0.0169937	-0.167727	ENSMUSG00000030287	Gencode.M18_pc	Itpr2	inositol 1,4,5-triphosphate receptor 2 [Source:MGI Symbol;Acc:MGI:99418]	protein_coding	GCCATTTAGCTCCCAGAACAATCCGTAACTGTGTTTGCACGCTTGAGAAGATTCAAGCTT	Itpr2	inositol 1,4,5-triphosphate receptor 2	chr6:146060064-146060005	NM_019923	16439	ITPR2	14.2037	15.0683	14.4685	12.4362	12.8545	13.0866
A_52_P416327	-1.78549	9.92336	-4.86445	0.00314646	0.0379313	-1.81802	ENSMUSG00000034028	Gencode.M18_pc	Cd226	CD226 antigen [Source:MGI Symbol;Acc:MGI:3039602]	protein_coding	TTAGCACATGAAAAGAGATTGATGGTTTTAAGTAGTAGAACACAGTAGTGTAGGAATCTG	Cd226	CD226 antigen	chr18:89439381-89439440	NM_178687	225825	CD226	10.6245	11.6092	10.2146	8.88552	8.91397	9.29235
A_55_P1976278	-1.78386	14.9548	-8.3359	0.000200384	0.00883102	1.2309	ENSMUSG00000052889	Gencode.M18_pc	Prkcb	protein kinase C, beta [Source:MGI Symbol;Acc:MGI:97596]	protein_coding	CCTGTGAATTCGTGTCTCTTGGAGGAAACTTTTTGTTTAAGAATTGGTATGATTAAACTG	Prkcb	protein kinase C, beta	chr7:129777841-129777900	NM_008855	18751	PRKCB	15.8497	16.2168	15.4736	13.8231	14.1781	14.1873
A_51_P109144	-1.78363	10.0451	-8.44904	0.000186367	0.00853998	1.31007	ENSMUSG00000038515	Gencode.M18_pc	Grtp1	GH regulated TBC protein 1 [Source:MGI Symbol;Acc:MGI:1914040]	protein_coding	AAGCAGATCACCAAAGGGGACTTTGTGACAGAGTGTCACGCATTCATGCAGAAAATCTTT	Grtp1	GH regulated TBC protein 1	chr8:13179373-13177134	NM_025768	66790	GRTP1	10.7797	11.3714	10.6595	9.06612	9.03879	9.35484
A_55_P2160810	-1.78353	8.65446	-5.41247	0.00187429	0.0281793	-1.24167	ENSMUSG00000055210	Gencode.M18_pc	Foxd2	forkhead box D2 [Source:MGI Symbol;Acc:MGI:1347471]	protein_coding	GACTTCTCCACTTAGCGGAGACTCTGTGAAATCGTCTGATGGTCTGTATGGAAGAAAAAA	Foxd2	forkhead box D2	chr4:114579003-114578944	NM_008593	17301	FOXD2	9.41545	10.2568	8.96643	7.87823	7.82029	7.58957
A_55_P2011560	-1.78193	5.96683	-14.8608	8.21559e-06	0.00185331	4.57514	ENSMUSG00000094808	Gencode.M18_pc	1810009J06Rik	RIKEN cDNA 1810009J06 gene [Source:MGI Symbol;Acc:MGI:1920876]	protein_coding	CCATTTCTCTTTCTTCTTATGCCTGAAATGAGGTTGAAATAAATACATTTCTGCTGCTCT	1810009J06Rik	RIKEN cDNA 1810009J06 gene	chr6:40918367-40918426	NM_023707	73626	1810009J06RIK	6.80287	6.69203	7.07849	5.01941	5.04478	5.1634
A_55_P2099650	-1.78068	13.8334	-8.30847	0.000203964	0.00892348	1.21155	ENSMUSG00000063873	Gencode.M18_pc	Slc24a3	solute carrier family 24 (sodium/potassium/calcium exchanger), member 3 [Source:MGI Symbol;Acc:MGI:2137513]	protein_coding	ACTTATCATCCATTCGGTATGGTTTTCCCAGTCCCTTGTACACATCCTGGTTTGAATTGT	Slc24a3	solute carrier family 24 (sodium/potassium/calcium exchanger), member 3	chr2:145467614-145467673	NM_053195	94249	SLC24A3	14.4973	15.1422	14.5319	13.0503	12.6855	13.0935
A_51_P209930	-1.78028	6.42859	-6.4131	0.000797133	0.0180368	-0.291182	ENSMUSG00000030401	Gencode.M18_pc	Rtn2	reticulon 2 (Z-band associated protein) [Source:MGI Symbol;Acc:MGI:107612]	protein_coding	CTGAGCGACCCGGACTACATTTCCTAAGAGGCTCTGCTCTAAGAGTCCAGGAAAAGGCCG	Rtn2	reticulon 2 (Z-band associated protein)	chr7:19881261-19881320	NM_013648	20167	RTN2	7.66167	7.58513	6.70938	5.42494	5.43196	5.75845
A_55_P1985793	-1.77762	11.5414	-8.74687	0.000154595	0.0078108	1.51367	ENSMUSG00000032198	Gencode.M18_pc	Dock6	dedicator of cytokinesis 6 [Source:MGI Symbol;Acc:MGI:1914789]	protein_coding	ATGAGCCCCCTGTCTGTCTGCACTGATGGATTCTAAATTTTGTTTTTGTTTGTTTTTAAT	Dock6	dedicator of cytokinesis 6	chr9:21604705-21604646	NM_177030	319899	DOCK6	12.4987	12.7547	12.0374	10.8465	10.5937	10.5176
A_55_P1973965	-1.77721	11.9671	-8.07584	0.000237509	0.00957431	1.04496	ENSMUSG00000021285	Gencode.M18_pc	Ppp1r13b	protein phosphatase 1, regulatory subunit 13B [Source:MGI Symbol;Acc:MGI:1336199]	protein_coding	CTGCCATCCCAGTGCCACCGATGCTGTGTGACGTGCACAATAAACTGCTGTCTCACACCT	Ppp1r13b	protein phosphatase 1, regulatory (inhibitor) subunit 13B	chr12:113066729-113066670	NM_011625	21981	PPP1R13B	12.9075	13.1937	12.4659	11.1375	10.8134	11.2847
A_55_P2151868	-1.77646	6.41145	-7.36857	0.00038657	0.0124479	0.509561	ENSMUSG00000051855	Gencode.M18_pc	Mest	mesoderm specific transcript [Source:MGI Symbol;Acc:MGI:96968]	protein_coding	AAGCCCTGAGATAGTTGTGCTTTTACATGGCTTTCCAACATCCAGCTATGACTGGTACAA	Mest	mesoderm specific transcript	chr6:30692160-30692219	NM_001252292	17294	MEST	7.71677	6.90307	7.2792	5.37196	5.37203	5.82567
A_55_P2183473	-1.77062	6.00534	-5.68541	0.00146815	0.0246457	-0.969918	ENSMUSG00000070473	Gencode.M18_pc	Cldn3	claudin 3 [Source:MGI Symbol;Acc:MGI:1329044]	protein_coding	GCAGGCAAACCATGAAACGGGCCATTTCATATTTTTCAATAAAAGTCTTTCGTTTTTTGC	Cldn3	claudin 3	chr5:135463284-135463342	NM_009902	12739	CLDN3	6.52529	7.57766	6.569	5.0445	4.94901	5.36657
A_52_P256914	-1.76542	7.39852	-5.96115	0.00115711	0.0218888	-0.705128	ENSMUSG00000040660	Gencode.M18_pc	Cyp2b9	cytochrome P450, family 2, subfamily b, polypeptide 9 [Source:MGI Symbol;Acc:MGI:88600]	protein_coding	CAGACAAATTGTCAAAAAACAGCAGGAACTCCTCGACTACATTGCCCATAGTGTGGAGAA	Cyp2b9	cytochrome P450, family 2, subfamily b, polypeptide 9	chr7:26983484-26983543	NM_010000	13094	CYP2B9	8.12055	8.82205	7.90108	6.55964	6.1342	6.85359
A_55_P2183010	-1.76272	10.8887	-4.55485	0.00429084	0.0453579	-2.16269	ENSMUSG00000029468	Gencode.M18_pc	P2rx7	purinergic receptor P2X, ligand-gated ion channel, 7 [Source:MGI Symbol;Acc:MGI:1339957]	protein_coding	GGTCAAAAAGCTCCCCAATCCATGCAACAATCACAAAATTAATGTTAGAGTTTCTTTTAG	P2rx7	purinergic receptor P2X, ligand-gated ion channel, 7	chr5:123105174-123105233	NM_001038887	18439	P2RX7	11.4107	12.6398	11.2598	9.97507	9.7858	10.2613
A_55_P2157048	-1.76025	9.30074	-5.78981	0.00134027	0.0235007	-0.868535	ENSMUSG00000028496	Gencode.M18_pc	Mllt3	myeloid/lymphoid or mixed-lineage leukemia; translocated to, 3 [Source:MGI Symbol;Acc:MGI:1917372]	protein_coding	GCAGCCAGTGTGGTACTCATTTCTTCTTAAAAACAAAACAAAAACAGGACTCAGAATTTT	Mllt3	myeloid/lymphoid or mixed-lineage leukemia; translocated to, 3	chr4:87418929-87418870	NM_027326	70122	MLLT3	9.87755	10.6231	10.0419	8.30982	8.00699	8.94504
A_52_P684138	-1.75739	6.4161	-10.0158	7.39045e-05	0.00541957	2.31007	ENSMUSG00000021221	Gencode.M18_pc	Dpf3	D4, zinc and double PHD fingers, family 3 [Source:MGI Symbol;Acc:MGI:1917377]	protein_coding	GCCGCAGCACGTACCACGGAGGACTTATTCGGTTCCACGTCAGAAAGTGACACCTCAACT	Dpf3	D4, zinc and double PHD fingers, family 3	chr12:84370573-84370514	NM_058212	70127	DPF3	7.15431	7.60452	7.12555	5.52318	5.33457	5.75446
A_66_P103027	-1.75639	7.72045	-6.80237	0.000587727	0.0154395	0.0466352	ENSMUSG00000046080	Gencode.M18_pc	Clec9a	C-type lectin domain family 9, member a [Source:MGI Symbol;Acc:MGI:2444608]	protein_coding	GCAATAGTCTGTAACGCTTTGCAGATTTCAGTTGACCTTGTCCATTGTGCCAAGGAAAAA	Clec9a	C-type lectin domain family 9, member a	chr6:129372492-129372551	NM_001205363	232414	CLEC9A	8.51306	8.38441	8.89845	6.44064	6.76227	7.32385
A_51_P388478	-1.75118	8.7496	-5.83544	0.00128842	0.0230604	-0.824656	ENSMUSG00000031217	Gencode.M18_pc	Efnb1	ephrin B1 [Source:MGI Symbol;Acc:MGI:102708]	protein_coding	TTTTGGACCCTCATGAGACAATGCTGTTCCTAGCAGTGGGGTAGTGACTACCACCCTTCT	Efnb1	ephrin B1	chrX:96343505-96343564	NM_010110	13641	EFNB1	10.2133	9.59697	9.06529	7.78805	8.10872	7.72525
A_51_P300506	-1.74893	11.179	-7.76475	0.000292893	0.0107939	0.815004	ENSMUSG00000051811	Gencode.M18_pc	Cox6b2	cytochrome c oxidase subunit 6B2 [Source:MGI Symbol;Acc:MGI:3044182]	protein_coding	GGAACTTTCCCGGGCAAAATATGACCTTGCACTTGAGCGCTGCTCCCCTGGCGTCATCAA	Cox6b2	cytochrome c oxidase subunit VIb polypeptide 2	chr7:4703547-4703488	NM_183405	333182	COX6B2	11.9257	12.2141	12.0206	9.98741	10.1383	10.7879
A_51_P151732	-1.74477	5.9875	-5.35441	0.0019765	0.0290588	-1.30076	ENSMUSG00000026413	Gencode.M18_pc	Pkp1	plakophilin 1 [Source:MGI Symbol;Acc:MGI:1328359]	protein_coding	CATCTTGTATGAGAACCTTGTGCTGAACGGGCCCAGTTTCCTTGTATGATACACCATGTA	Pkp1	plakophilin 1	chr1:137768086-137768027	NM_019645	18772	PKP1	7.43968	6.99766	6.14231	5.21164	5.06255	5.07115
A_52_P316933	-1.74313	11.2598	-7.40559	0.000376478	0.0122647	0.538722	ENSMUSG00000032261	Gencode.M18_pc	Sh3bgrl2	SH3 domain binding glutamic acid-rich protein like 2 [Source:MGI Symbol;Acc:MGI:1915350]	protein_coding	TTGTATTTGTCTCTCAAGGCATTGGTGAAATCTCAGATTTTATATTCTGCTTTAAAGGGG	Sh3bgrl2	SH3 domain binding glutamic acid-rich protein like 2	chr9:83493811-83493870	NM_172507	212531	SH3BGRL2	11.7246	12.4956	12.1737	10.0768	10.5416	10.5462
A_55_P2142232	-1.74116	7.42475	-9.34791	0.000107778	0.0063716	1.90455	ENSMUSG00000079014	Gencode.M18_pc	Serpina3i	serine (or cysteine) peptidase inhibitor, clade A, member 3I [Source:MGI Symbol;Acc:MGI:2182841]	protein_coding	GCTGCCACAGGAGTCAAAGTTAATCTACGTTGTGGAAAAATCTATTCTATGACAATATAT	Serpina3i	serine (or cysteine) peptidase inhibitor, clade A, member 3I	chr12:105506705-105506764	NM_001199940	628900	SERPINA3I	8.11031	8.54202	8.23365	6.87246	6.48349	6.30656
A_52_P141628	-1.74071	5.86363	-4.90882	0.00301286	0.0370482	-1.76978	ENSMUSG00000024354	Gencode.M18_pc	Slc23a1	solute carrier family 23 (nucleobase transporters), member 1 [Source:MGI Symbol;Acc:MGI:1341903]	protein_coding	CCTTCACATAGGGGAAATAAATCTATACTTTCAGACTAGCTCAGTGATTAAAATGTCTAT	Slc23a1	solute carrier family 23 (nucleobase transporters), member 1	chr18:35774899-35774840	NM_011397	20522	SLC23A1	6.20473	7.55292	6.44429	4.93601	4.93987	5.10393
A_55_P2030752	-1.74056	11.4467	-8.55082	0.000174724	0.00833932	1.38041	ENSMUSG00000024589	Gencode.M18_pc	Nedd4l	neural precursor cell expressed, developmentally down-regulated gene 4-like [Source:MGI Symbol;Acc:MGI:1933754]	protein_coding	CCTCTGCAGGCAAAGCCCTTAATAAATATTTTGCATACTTTCTAATGACAATGAATGGAA	Nedd4l	neural precursor cell expressed, developmentally down-regulated gene 4-like	chr18:65372799-65372858	NM_031881	83814	NEDD4L	12.3502	12.6615	11.9393	10.3728	10.6872	10.6693
A_55_P1957468	-1.73879	7.38098	-7.9035	0.000266521	0.0101738	0.918607	ENSMUSG00000046280	Gencode.M18_pc	She	src homology 2 domain-containing transforming protein E [Source:MGI Symbol;Acc:MGI:1099462]	protein_coding	GTGTGCCTTCCGGAAGATGGTTTACCCTGAAGTGTTACTTTCAATAAATGCTTTGCCAGG	She	src homology 2 domain-containing transforming protein E	chr3:89662699-89662758	NM_172530	214547	SHE	8.55567	8.31409	7.88136	6.22659	6.77584	6.53233
A_55_P2010641	-1.73824	8.90343	-4.61557	0.00403337	0.0438514	-2.09398	ENSMUSG00000031170	Gencode.M18_pc	Slc38a5	solute carrier family 38, member 5 [Source:MGI Symbol;Acc:MGI:2148066]	protein_coding	CCTAGATGAAGCTGTTAGGGTTACCCTGGCGCTAAAAGGGAAGAATAAAGATGCTGAATG	Slc38a5	solute carrier family 38, member 5	chrX:7857241-7857300	NM_172479	209837	SLC38A5	9.34022	10.0749	9.9025	7.56129	7.74114	8.80051
A_52_P148678	-1.73798	10.4752	-4.78828	0.00339187	0.0395984	-1.90151	ENSMUSG00000016933	Gencode.M18_pc	Plcg1	phospholipase C, gamma 1 [Source:MGI Symbol;Acc:MGI:97615]	protein_coding	GAGCTTTTTTGTTTTTATGACAAAGACGACTCGATATGCTTCCCCTTAGGAATGGAGATA	Plcg1	phospholipase C, gamma 1	chr2:160588680-160588739	AK169695	18803	PLCG1	11.5027	11.9496	10.5801	9.70798	9.79379	9.31673
A_66_P138915	-1.73647	9.23927	-11.3058	3.78846e-05	0.0039324	3.01839	ENSMUSG00000019843	Gencode.M18_pc	Fyn	Fyn proto-oncogene [Source:MGI Symbol;Acc:MGI:95602]	protein_coding	AGCGAACTGTGATTCGTTCTTGAAACTTAGGAGTGAGCATTTTAAGCAAAAAGCAGCCAG	Fyn	Fyn proto-oncogene	chr10:39284572-39284631	NM_001122893	14360	FYN	9.83307	10.1219	10.3675	8.34841	8.49791	8.26678
A_55_P2043083	-1.73109	7.02383	-7.84649	0.00027701	0.010356	0.87624	ENSMUSG00000066071	Gencode.M18_pc	Cyp4a12a	cytochrome P450, family 4, subfamily a, polypeptide 12a [Source:MGI Symbol;Acc:MGI:88612]	protein_coding	ATGCATATCTGAAAGAGCCAATTTTCAACCAACCTAACAGAGACCTTCCCTGACTGTCAC	Cyp4a12a	cytochrome P450, family 4, subfamily a, polypeptide 12a	chr4:115005258-115005317	NM_177406	277753	CYP4A12A	7.98773	7.72271	7.95769	5.68679	6.31758	6.4705
A_55_P2004752	-1.73041	6.07414	-5.30027	0.00207759	0.0301017	-1.35627	ENSMUSG00000056457	Gencode.M18_pc	Prl2c3	prolactin family 2, subfamily c, member 3 [Source:MGI Symbol;Acc:MGI:1341833]	protein_coding	GGTTCTTGCAATCTGACAATGAAGATGCTCGCATTCGTTCTTCATATGGCATGATCAGCT	Prl2c5	prolactin family 2, subfamily c, member 5	chr13:13283943-13284002	NM_001311129	107849	PRL2C3	6.72279	6.43705	7.65819	5.00725	5.38255	5.23701
A_66_P121480	-1.72956	7.12291	-4.40373	0.00501668	0.0495189	-2.33611	ENSMUSG00000009614	Gencode.M18_pc	Sardh	sarcosine dehydrogenase [Source:MGI Symbol;Acc:MGI:2183102]	protein_coding	GAGAGCTGACTTTGGATTTACTGTGAACAAGACCATCGCCTATGGCTACATCCGAGACCC	Sardh	sarcosine dehydrogenase	chr2:27047471-27047412	NM_138665	192166	SARDH	7.89915	8.48779	7.57614	5.8129	7.01677	5.94473
A_51_P511431	-1.72822	6.85319	-15.5676	6.32238e-06	0.00167179	4.83072	ENSMUSG00000056055	Gencode.M18_pc	Sag	S-antigen, retina and pineal gland (arrestin) [Source:MGI Symbol;Acc:MGI:98227]	protein_coding	TCTACTCAAGTGACTATTACGTCAAGCCTGTAGCCTCGGAGGAAACACAAGAAAAAGTGC	Sag	S-antigen, retina and pineal gland (arrestin)	chr1:89724996-89728424	NM_009118	20215	SAG	7.69056	7.54209	7.91924	6.01068	5.99219	5.96435
A_55_P2417434	-1.7269	8.65208	-7.00235	0.000505288	0.0142571	0.213854	NA	Agilent eArray	E130215H24Rik	RIKEN cDNA E130215H24 gene	NA	GACCATCAGCTCCGTCATGAAGTTCAAGTTTTTGTTACTGAATAATCAAGAGTAAAAAGA	E130215H24Rik	RIKEN cDNA E130215H24 gene	chr2:150494686-150494745	AK160355	109344	E130215H24RIK	9.54252	9.58771	9.41635	7.94538	7.24144	8.17907
A_52_P84901	-1.72504	6.67456	-6.27342	0.000892436	0.0191115	-0.416543	ENSMUSG00000028412	Gencode.M18_pc	Slc44a1	solute carrier family 44, member 1 [Source:MGI Symbol;Acc:MGI:2140592]	protein_coding	ATTATTGCTACAGAGATAACTGCCCTGTAGTATCCCAATGGATATCACTCCCAGTCTCAA	Slc44a1	solute carrier family 44, member 1	chr4:53635105-53635164	NM_133891	100434	SLC44A1	7.35161	8.01263	7.247	5.41921	5.86048	6.15645
A_51_P498388	-1.72365	8.66768	-19.5541	1.73766e-06	0.00108656	6.02924	ENSMUSG00000042978	Gencode.M18_pc	Sbk1	SH3-binding kinase 1 [Source:MGI Symbol;Acc:MGI:2135937]	protein_coding	AGGCTTAGAAGACAAACCACAGAGGAAACCTCCCCCTTTACAAGTTTTCTGTGAAGTACA	Sbk1	SH3-binding kinase 1	chr7:133438000-133438059	NM_145587	104175	SBK1	9.50978	9.65327	9.42546	7.75977	7.87484	7.78295
A_51_P227275	-1.72281	7.8715	-9.85534	8.07443e-05	0.00560353	2.21527	ENSMUSG00000001622	Gencode.M18_pc	Csn3	casein kappa [Source:MGI Symbol;Acc:MGI:107461]	protein_coding	GCAATTTTCACAGATTCAGATCTTTCTCGTCTTCCCTTACCTTTTACATTAACATCACAG	Csn3	casein kappa	chr5:88361449-88361508	XM_006534765	12994	CSN3	8.80668	8.37414	9.01791	6.90934	7.06992	7.05103
A_55_P2109327	-1.72239	6.80195	-6.38313	0.000816552	0.0183047	-0.317893	ENSMUSG00000023328	Gencode.M18_pc	Ache	acetylcholinesterase [Source:MGI Symbol;Acc:MGI:87876]	protein_coding	TGTATATACACTATTTATTTAAGGGCTGGGATATAATACGACCGAGCCCCCAGGCCCTGT	Ache	acetylcholinesterase	chr5:137735513-137735572	NM_001290010	11423	ACHE	7.85305	8.07144	7.06494	5.82305	5.91475	6.08445
A_55_P1997997	-1.72202	5.8894	-9.77144	8.46141e-05	0.00571872	2.16504	ENSMUSG00000067599	Gencode.M18_pc	Klra7	killer cell lectin-like receptor, subfamily A, member 7 [Source:MGI Symbol;Acc:MGI:101901]	protein_coding	TCATACATCTGTATTTGTAGTAAGAGACTGGATAAATTTCCTCATTGACTCTCCAACGAG	Klra23	killer cell lectin-like receptor subfamily A, member 23	chr6:130241238-130241179	NM_024470	79410	KLRA7	6.40889	7.00258	6.83976	4.96813	4.91458	5.20248
A_55_P2142146	-1.7206	12.9946	-21.8536	9.22836e-07	0.000795968	6.57291	ENSMUSG00000026473	Gencode.M18_pc	Glul	glutamate-ammonia ligase (glutamine synthetase) [Source:MGI Symbol;Acc:MGI:95739]	protein_coding	CGCTTATAAATCAACCTAACATTTATAAGATTTCCTCTGACTTGTTTCTTTGTGGTTCCC	Glul	glutamate-ammonia ligase (glutamine synthetase)	chr1:155756765-155756824	NM_008131	14645	GLUL	13.8398	13.8307	13.8943	12.0599	12.102	12.2412
A_51_P282227	-1.71924	8.03048	-10.2961	6.35058e-05	0.0050785	2.47199	ENSMUSG00000003559	Gencode.M18_pc	As3mt	arsenic (+3 oxidation state) methyltransferase [Source:MGI Symbol;Acc:MGI:1929882]	protein_coding	CCCAAGGTTTACTCAAAGGGCCAAAGGCATCATCAACGTTGTGAGAATTATCTTCCTTCT	As3mt	arsenic (+3 oxidation state) methyltransferase	chr19:46815312-46815371	NM_020577	57344	AS3MT	8.69786	8.77543	9.19701	7.31452	7.22635	6.97171
A_51_P262230	-1.71908	7.61721	-5.01711	0.00271309	0.0349767	-1.65321	ENSMUSG00000041625	Gencode.M18_pc	Ggact	gamma-glutamylamine cyclotransferase [Source:MGI Symbol;Acc:MGI:2385008]	protein_coding	ATTGGGTTGGATCAGTGTAAAAACATCAAGGAAAGCATGTTGTACTTAAACTATGTGCTC	Ggact	gamma-glutamylamine cyclotransferase	chr14:123290220-123290161	NM_145466	223267	GGACT	8.63514	9.05394	7.74116	6.69867	6.98268	6.59167
A_55_P2138792	-1.71898	14.2856	-9.85167	8.09092e-05	0.00560424	2.21308	ENSMUSG00000032051	Gencode.M18_pc	Fdx1	ferredoxin 1 [Source:MGI Symbol;Acc:MGI:103224]	protein_coding	AGGGAACGTTGGCTTGCTCTACTTGTCATCTTATCTTTGAGGATCACATCTATGAGAAGT	Fdx1	ferredoxin 1	chr9:51756802-51756743	NM_007996	14148	FDX1	15.116	15.4517	14.8676	13.4733	13.5678	13.2373
A_55_P2167123	-1.71869	6.39192	-5.92596	0.00119224	0.0220809	-0.738387	ENSMUSG00000083457	Agilent eArray	Cyp4b1-ps2	cytochrome P450, family 4, subfamily b, polypeptide 1, pseudogene 2	unprocessed_pseudogene	GTCTCTAGAACTCATTCCTTCACTCCAAAAACATTTGCTGCCTTGAGAAACTTAATTTAT	Cyp4b1-ps2	cytochrome P450, family 4, subfamily b, polypeptide 1, pseudogene 2	chr4:115254755-115254696	NR_033575	631037	CYP4B1-PS2	6.71917	7.8814	7.15323	5.51345	5.50287	5.58142
A_55_P1997525	-1.71858	6.46528	-4.48634	0.00460402	0.0473221	-2.24088	ENSMUSG00000032503	Gencode.M18_pc	Arpp21	cyclic AMP-regulated phosphoprotein, 21 [Source:MGI Symbol;Acc:MGI:107562]	protein_coding	GCCTCAGTCCAGTACAGTGCTCAGCGGAGTCAGCAAATACCACAGACCACACAGCAAGCA	Arpp21	cyclic AMP-regulated phosphoprotein, 21	chr9:112021747-112021688	NM_001177617	74100	ARPP21	7.51523	7.97356	6.48492	5.4853	5.50816	5.8245
A_55_P2119917	-1.7131	8.79142	-8.90325	0.000140455	0.00746207	1.61788	ENSMUSG00000002578	Gencode.M18_pc	Ikzf4	IKAROS family zinc finger 4 [Source:MGI Symbol;Acc:MGI:1343139]	protein_coding	TTCGTGAGACCATGCAGGAGGAGGCATAGCTCCATTGCAGGTGGAAGTCTCTCTCTCTAA	Ikzf4	IKAROS family zinc finger 4	chr10:128069663-128069604	NM_011772	22781	IKZF4	10.0421	9.37337	9.52846	8.06156	7.77783	7.96521
A_66_P122860	-1.71192	6.6907	-4.49592	0.00455872	0.0470905	-2.22991	ENSMUSG00000034457	Gencode.M18_pc	Eda2r	ectodysplasin A2 receptor [Source:MGI Symbol;Acc:MGI:2442860]	protein_coding	CCTCAGAGAGCCATTCTCAATGGGTCCATACCCCAATTGAATGTACAGAGCTGGACCTGC	Eda2r	ectodysplasin A2 receptor	chrX:94534340-94534281	NM_001161433	245527	EDA2R	7.20198	8.29478	7.14321	5.56434	5.60364	6.33623
A_55_P2177154	-1.71151	14.5755	-8.10047	0.000233669	0.00947918	1.06281	ENSMUSG00000094338	Gencode.M18_pc	Hist1h2bl	histone cluster 1, H2bl [Source:MGI Symbol;Acc:MGI:2448403]	protein_coding	AAGCGCAGCCGCAAGGAGAGCTACTCGGTGTACGTGTACAAGGTGCTAAAGCAAGTGCAC	Hist1h2bm	histone cluster 1, H2bm	chr13:21814057-21814116	NM_178200	319186	HIST1H2BL	15.0348	15.4869	15.7722	13.5205	13.7289	13.91
A_55_P2044659	-1.70936	7.71993	-11.9449	2.79151e-05	0.00340408	3.33716	ENSMUSG00000097712	Gencode M18	Gm10532	predicted gene 10532 [Source:MGI Symbol;Acc:MGI:3641671]	lincRNA	GATCTACCTCCGCTCTCACAACCTTAAGTGCAATTATCCTTAATAAACAAATTGGATTTA	Gm10532	predicted gene 10532	chr18:75682397-75682456	NR_045879	100038353	GM10532	8.57874	8.48418	8.66091	6.74439	6.69529	7.15608
A_51_P435922	-1.70683	9.50269	-14.6594	8.87159e-06	0.00194777	4.49948	ENSMUSG00000023966	Gencode.M18_pc	Rsph9	radial spoke head 9 homolog (Chlamydomonas) [Source:MGI Symbol;Acc:MGI:1922814]	protein_coding	CATCTACGTAGGCACAGGAGAGAAGAACATGGACTTGCCCTTCATGCTGTAGGAAGGCAG	Rsph9	radial spoke head 9 homolog (Chlamydomonas)	chr17:46266338-46266279	NM_029338	75564	RSPH9	10.2661	10.3771	10.4251	8.48627	8.60675	8.8548
A_52_P644690	-1.70651	11.7423	-8.93738	0.000137573	0.00737234	1.64038	ENSMUSG00000110206	Gencode.M18_pc	Flt3l	FMS-like tyrosine kinase 3 ligand [Source:MGI Symbol;Acc:MGI:95560]	protein_coding	ATACTGACTTTAAGAAAAACAGAAAGGAAGAAGGGGGGTGCGTTGTAGCCCTGTGTGGTT	Flt3l	FMS-like tyrosine kinase 3 ligand	chr7:52386662-52386603	NM_013520	14256	FLT3L	12.9228	12.542	12.322	10.8845	10.6712	11.1115
A_51_P235984	-1.70567	11.6636	-7.73019	0.000299926	0.0109215	0.788931	ENSMUSG00000032089	Gencode.M18_pc	Il10ra	interleukin 10 receptor, alpha [Source:MGI Symbol;Acc:MGI:96538]	protein_coding	GTCATGACCCTAATCTGGTACGAGAGCTCCTTCTGGAACTGGGCAAGCTCTTTGAGACCC	Il10ra	interleukin 10 receptor, alpha	chr9:45062296-45062237	NM_008348	16154	IL10RA	12.909	12.2102	12.4301	10.5404	10.8402	11.0517
A_52_P298002	-1.7032	9.17939	-5.21646	0.00224598	0.0314264	-1.44299	ENSMUSG00000037580	Gencode.M18_pc	Gch1	GTP cyclohydrolase 1 [Source:MGI Symbol;Acc:MGI:95675]	protein_coding	CTGAACGACCCTGTTGGGTCATTCTCTAGAAGTGTTCTTAACAAATGCCTGACATCTCCA	Gch1	GTP cyclohydrolase 1	chr14:47773856-47773797	NM_008102	14528	GCH1	9.90993	10.3127	9.87036	8.39865	7.67577	8.90895
A_55_P1991773	-1.70281	6.09961	-7.74419	0.000297054	0.0108767	0.799504	ENSMUSG00000026009	Gencode.M18_pc	Icos	inducible T cell co-stimulator [Source:MGI Symbol;Acc:MGI:1858745]	protein_coding	CTTCTCCATTGTAAAGGGATTCTGCTCCTGAACAGCCAATAAATATGCTTTGTGAGAGAA	Icos	inducible T cell co-stimulator	chr1:61057105-61057164	NM_017480	54167	ICOS	7.37563	6.96871	6.5087	5.30472	5.2613	5.17859
A_55_P2167788	-1.70214	11.8133	-8.95417	0.00013618	0.00733022	1.65142	ENSMUSG00000112963	Gencode M18	Gm6093	predicted gene 6093 [Source:MGI Symbol;Acc:MGI:3648840]	lincRNA	AATGGATGCTATCGCCCTCAATTTGTACTACCCATGGAACAAATAATTGGTTGTACAATC	Gm6093	predicted gene 6093	chr13:33656003-33655944	NR_131140	619715	GM6093	12.7469	12.5172	12.7292	11.1129	10.5612	11.2127
A_52_P54261	-1.70206	6.12386	-6.33542	0.000848604	0.0186652	-0.360629	ENSMUSG00000028132	Gencode.M18_pc	Tmem56	transmembrane protein 56 [Source:MGI Symbol;Acc:MGI:1923195]	protein_coding	TCAGTGTTACTAAGGTATATCAGTAATTAAAGTACAACCTAGGCTCTTCGATTTGGTTTC	Tmem56	transmembrane protein 56	chr3:120905299-120905240	NM_178936	99887	TMEM56	6.64207	6.75371	7.52888	5.19418	5.07293	5.55136
A_55_P2125786	-1.70052	6.02731	-6.03965	0.00108292	0.0210687	-0.631473	ENSMUSG00000046589	Gencode.M18_pc	Lrrc8e	leucine rich repeat containing 8 family, member E [Source:MGI Symbol;Acc:MGI:1919517]	protein_coding	TTTCCTGTGCAGGGGAGCATATACCACTGGGTGCTTAATAAACGAGAACGGTAATTTCCA	Lrrc8e	leucine rich repeat containing 8 family, member E	chr8:4237411-4237470	NM_028175	72267	LRRC8E	7.40281	6.91748	6.31241	5.04834	5.11913	5.36368
A_52_P426768	-1.69859	11.2961	-8.66362	0.000162794	0.00806145	1.45744	ENSMUSG00000070803	Gencode.M18_pc	Cited4	Cbp/p300-interacting transactivator, with Glu/Asp-rich carboxy-terminal domain, 4 [Source:MGI Symbol;Acc:MGI:1861694]	protein_coding	TGACCTTCCTTCTCGAGCAGCCTACTAACCGGATTGGGTCTAGGGAGCCATCTCTCCGTA	Cited4	Cbp/p300-interacting transactivator, with Glu/Asp-rich carboxy-terminal domain, 4	chr4:120340245-120340304	NM_019563	56222	CITED4	12.5013	12.0173	11.9177	10.7084	10.2902	10.342
A_55_P2015670	-1.69778	14.6073	-4.96543	0.00285169	0.0358699	-1.70863	ENSMUSG00000027111	Gencode.M18_pc	Itga6	integrin alpha 6 [Source:MGI Symbol;Acc:MGI:96605]	protein_coding	GAGAATGAGAACCTGGGAGGTCTTGTTGTTGTTGTTGTTCTGACCTTACTTATTTACTGC	Itga6	integrin alpha 6	chr2:71694756-71694815	NM_008397	16403	ITGA6	15.0493	16.2476	15.0715	13.6017	13.8318	13.8416
A_55_P1985514	-1.69619	10.8312	-15.7804	5.8561e-06	0.00164311	4.90475	ENSMUSG00000000881	Gencode.M18_pc	Dlg3	discs large MAGUK scaffold protein 3 [Source:MGI Symbol;Acc:MGI:1888986]	protein_coding	CGAAGTAAGCATGATAATAGTTGGTTTACCAGTGTTCCTTCCAAGGAGACATATATTTTT	Dlg3	discs, large homolog 3 (Drosophila)	chrX:98013667-98013726	NM_016747	53310	DLG3	11.6178	11.5814	11.8386	9.85028	10.0227	10.0762
A_55_P2095019	-1.69297	12.445	-5.84068	0.00128261	0.0230056	-0.819629	ENSMUSG00000032020	Gencode.M18_pc	Ubash3b	ubiquitin associated and SH3 domain containing, B [Source:MGI Symbol;Acc:MGI:1920078]	protein_coding	GTTCAGAGATGACTTAATAAAAAGAAACTGTGCCCTCAGTTGCCCCAGCACAACTACAAA	Ubash3b	ubiquitin associated and SH3 domain containing, B	chr9:40819238-40819181	XM_006510632	72828	UBASH3B	13.0447	13.8841	12.9455	11.2712	11.7699	11.7543
A_55_P1990623	-1.69157	11.3063	-8.00099	0.000249634	0.00988332	0.990397	ENSMUSG00000000617	Gencode.M18_pc	Grm6	glutamate receptor, metabotropic 6 [Source:MGI Symbol;Acc:MGI:1351343]	protein_coding	CCTCTGTGACCTCTTCTAGAGTCAGTTAGCCATGGTCTGAATAAAGGTTTTCTTGCACTT	Grm6	glutamate receptor, metabotropic 6	chr11:50679649-50679708	NM_173372	108072	GRM6	12.0709	12.4472	11.9382	10.6607	10.0835	10.6374
A_55_P2025528	-1.69137	7.601	-5.18061	0.00232274	0.0320914	-1.48039	ENSMUSG00000031355	Gencode.M18_pc	Arhgap6	Rho GTPase activating protein 6 [Source:MGI Symbol;Acc:MGI:1196332]	protein_coding	TAAAAAAGAAAAGGCCAGAGATAAGAAGCTGAGTCTGAATCCTATTTACAGGCAGGTCCC	Arhgap6	Rho GTPase activating protein 6	chrX:165686543-165686602	NM_009707	11856	ARHGAP6	8.94196	8.69113	7.70697	6.68039	6.90882	6.67673
A_52_P306697	-1.69056	5.98644	-5.72491	0.00141818	0.0241537	-0.931387	ENSMUSG00000045103	Gencode.M18_pc	Dmd	dystrophin, muscular dystrophy [Source:MGI Symbol;Acc:MGI:94909]	protein_coding	CGACTTCGCCAAGGTACTAAAAAACAAATTTCGAACCAAAAGGTATTTTGCGAAGCATCC	Dmd	dystrophin, muscular dystrophy	chrX:82389391-82389450	NM_007868	13405	DMD	6.93701	7.35671	6.20143	5.0062	5.14226	5.275
A_51_P314107	-1.68926	7.11288	-5.11481	0.00247157	0.0331822	-1.54949	ENSMUSG00000017204	Gencode.M18_pc	Gsdma	gasdermin A [Source:MGI Symbol;Acc:MGI:1889509]	protein_coding	CTAAGCCCATCTCCTGATGCTTAAATCCTGAAGATACAGAATCATTCAAACCCTTACTAC	Gsdma	gasdermin A	chr11:98537914-98537973	NM_021347	57911	GSDMA	7.29556	8.45408	8.12288	5.9435	6.29142	6.56983
A_55_P1994887	-1.68635	13.5204	-5.05907	0.00260622	0.0342525	-1.60851	ENSMUSG00000049577	Gencode.M18_pc	Zfpm1	zinc finger protein, multitype 1 [Source:MGI Symbol;Acc:MGI:1095400]	protein_coding	GCCTGTGGGGCCGCACCACCAGGACCCTTGACACTTAATAAAGACATTCGGTGTGACAAA	Zfpm1	zinc finger protein, multitype 1	chr8:124861092-124861151	AF006492	22761	ZFPM1	13.9969	15.0282	14.0656	12.6233	12.3454	13.0629
A_55_P2059890	-1.68575	14.1601	-8.94184	0.000137201	0.00737234	1.64332	ENSMUSG00000032051	Gencode.M18_pc	Fdx1	ferredoxin 1 [Source:MGI Symbol;Acc:MGI:103224]	protein_coding	GTCCGACAGTCTGTTGACATGAGCAAGAATTCCTAAGCTACAATAAAAAGAAATATTTTC	Fdx1	ferredoxin 1	chr9:51751675-51751616	NM_007996	14148	FDX1	15.0571	15.2944	14.6574	13.2909	13.5114	13.1493
A_55_P2041140	-1.68462	5.72975	-5.0326	0.00267307	0.0346829	-1.63668	ENSMUSG00000033219	Gencode.M18_pc	Gm9758	predicted gene 9758 [Source:MGI Symbol;Acc:MGI:3704245]	protein_coding	ATTGAACCTGAGTGGTAAAGACGAACAGGAGAACAGCAATCTTGAGACTCCAGAATATCA	Gm9758	predicted gene 9758	chr5:14911400-14911341	NM_198666	381714	GM9758	6.47099	7.29999	5.94518	4.88776	4.9164	4.85815
A_55_P1990864	-1.68269	8.64143	-10.3976	6.01703e-05	0.00501087	2.52944	ENSMUSG00000031698	Gencode.M18_pc	Mylk3	myosin light chain kinase 3 [Source:MGI Symbol;Acc:MGI:2443063]	protein_coding	TGTGTCAGCCAGACAGGGCATCAAATTAAGATCATTGACTTTGGGCTGGCTAGAAGGTAA	NA	NA	chr8:087866611-087866552	NA	NA	MYLK3	9.54544	9.57307	9.32981	7.92805	7.47821	7.99401
A_55_P2109257	-1.68248	12.3802	-7.63897	0.000319447	0.0112026	0.7196	ENSMUSG00000028803	Gencode.M18_pc	Nipal3	NIPA-like domain containing 3 [Source:MGI Symbol;Acc:MGI:1921802]	protein_coding	CATGTGTTATTTTGCAGAAGTGTGTATACTGTGTGCAGATAACATTGTAAAGCGGTATTT	Nipal3	NIPA-like domain containing 3	chr4:135004894-135004835	NM_028995	74552	NIPAL3	13.109	13.6584	12.8969	11.3389	11.5468	11.7311
A_52_P94401	-1.68139	6.54069	-7.35496	0.000390358	0.0125364	0.49881	ENSMUSG00000045287	Gencode.M18_pc	Rtn4rl1	reticulon 4 receptor-like 1 [Source:MGI Symbol;Acc:MGI:2661375]	protein_coding	ACTGTACTCGCAATGAGAGTCACACAGAAGGTGCAGTTTTATACCTATGTCCACTTATAT	Rtn4rl1	reticulon 4 receptor-like 1	chr11:75080214-75080273	NM_177708	237847	RTN4RL1	7.22125	7.63117	7.29174	5.41378	5.52743	6.15879
A_51_P469443	-1.68112	6.48622	-4.83045	0.00325342	0.0386375	-1.85519	ENSMUSG00000046774	Gencode.M18_pc	8030474K03Rik	RIKEN cDNA 8030474K03 gene [Source:MGI Symbol;Acc:MGI:2685988]	protein_coding	CCCATATTCCCTAATGAAGAAAGTCAGCAAGTAATACATGGGACACCAGGTTGTGCACAG	NA	NA	chrX:98992722-98992781	XM_001000772	NA	8030474K03RIK	7.05444	7.88945	7.03647	5.19928	6.21467	5.52304
A_52_P460957	-1.68006	10.3014	-9.10395	0.000124455	0.0069255	1.749	ENSMUSG00000063889	Gencode.M18_pc	Crem	cAMP responsive element modulator [Source:MGI Symbol;Acc:MGI:88495]	protein_coding	GGAAGCTGCTAAAGAATGTCGACGTCGAAAGAAAGAGTATGTGAAGTGTCTTGAGAGTCG	Crem	cAMP responsive element modulator	chr18:3267730-3267671	NM_013498	12916	CREM	10.8714	11.1097	11.4433	9.28029	9.39901	9.70491
A_55_P2266013	-1.6799	7.85597	-9.72864	8.66712e-05	0.0057929	2.13925	ENSMUSG00000085918	Gencode M18	Gm13032	predicted gene 13032 [Source:MGI Symbol;Acc:MGI:3702685]	processed_transcript	GAGCCAGGGAAAAGTTGAAGTTTGGTTCTGAAGGTCCCTGTCACTTGATTACAATTTTTT	Gm13032	predicted gene 13032	chr4:140373346-140373405	NR_045944	100049161	GM13032	8.36188	8.82295	8.90293	6.83703	7.05183	7.15919
A_52_P295067	-1.67544	8.82015	-5.32435	0.00203191	0.0296448	-1.33153	ENSMUSG00000037972	Gencode.M18_pc	Snn	stannin [Source:MGI Symbol;Acc:MGI:1276549]	protein_coding	CCTTTTTAAGTGTATACCAGAGCCGTACACTCCAATGGTTAGTAAGTCATAACTTCTCTT	Snn	stannin	chr16:11074700-11074759	NM_009223	20621	SNN	9.33117	9.32637	10.3161	7.69886	8.28506	7.96335
A_51_P419017	-1.67433	7.98551	-9.73254	8.64812e-05	0.0057929	2.14161	ENSMUSG00000023868	Gencode.M18_pc	Pde10a	phosphodiesterase 10A [Source:MGI Symbol;Acc:MGI:1345143]	protein_coding	GAGAAATCCAAACTGTTGATTACAGGTGCACTACAGGTATGCTCTTTCAGTCTATCTGGG	Pde10a	phosphodiesterase 10A	chr17:9174995-9175054	NM_011866	23984	PDE10A	8.70828	9.19293	8.56682	7.09124	7.20811	7.1457
A_51_P442097	-1.67128	11.6916	-8.50076	0.000180341	0.00842511	1.34592	ENSMUSG00000030089	Gencode.M18_pc	Slc41a3	solute carrier family 41, member 3 [Source:MGI Symbol;Acc:MGI:1918949]	protein_coding	GAAGATGCTGAGGAAGGAGCCTATTGGTGCAACCTAGGTTGGTGATCCATTGGGTGGATC	Slc41a3	solute carrier family 41, member 3	chr6:90596084-90596143	NM_027868	71699	SLC41A3	12.678	12.8053	12.0984	10.83	10.7802	10.9578
A_55_P2153382	-1.6696	6.90921	-5.67512	0.0014815	0.0247208	-0.979985	ENSMUSG00000028644	Gencode.M18_pc	Ermap	erythroblast membrane-associated protein [Source:MGI Symbol;Acc:MGI:1349816]	protein_coding	AAGCTACATCCTGCAAATCAGTAATGTGAGGCTCGAGGACCGAGGGCTATACCAGTGCCA	Ermap	erythroblast membrane-associated protein	chr4:118859813-118859754	NM_013848	27028	ERMAP	7.82089	7.68135	7.72979	5.8678	5.61185	6.74358
A_55_P2004268	-1.66953	6.52207	-6.03995	0.00108265	0.0210687	-0.631196	ENSMUSG00000043099	Gencode.M18_pc	Hic1	hypermethylated in cancer 1 [Source:MGI Symbol;Acc:MGI:1338010]	protein_coding	AGTTTGCTCAACAGCGCAACCTCATCAGCCATATGAAGATGCACGCTGTAGGTGGCGCGG	Hic1	hypermethylated in cancer 1	chr11:74979288-74979229	NM_010430	15248	HIC1	7.55122	7.76774	6.75155	5.61521	5.87507	5.57161
A_51_P243134	-1.66486	9.46261	-9.04222	0.000129139	0.00707746	1.70898	ENSMUSG00000022994	Agilent eArray	Adcy6	adenylate cyclase 6	protein_coding	AGGCAGAGGAGAGGAAGATCAGCTGGTCCAGGCAGAAAATTTCCTGTCTCCCCGAGCCAT	Adcy6	adenylate cyclase 6	chr15:98420418-98420404	NM_007405	11512	ADCY6	10.0784	10.6684	10.1384	8.5821	8.50377	8.80467
A_55_P2086664	-1.66182	9.441	-4.88966	0.00306975	0.0373797	-1.79058	ENSMUSG00000001763	Gencode.M18_pc	Tspan33	tetraspanin 33 [Source:MGI Symbol;Acc:MGI:1919012]	protein_coding	TTTCTACAGTGTAAGAATCGGGAATCTGGCAGAAATGGCAATAAAAGTTTGTTGACATGG	Tspan33	tetraspanin 33	chr6:29668498-29668557	NM_146173	232670	TSPAN33	10.1946	10.237	10.3841	8.31658	8.11825	9.39544
A_55_P2048518	-1.66015	13.4487	-5.15404	0.00238157	0.0325074	-1.50822	ENSMUSG00000049577	Gencode.M18_pc	Zfpm1	zinc finger protein, multitype 1 [Source:MGI Symbol;Acc:MGI:1095400]	protein_coding	AGTGAGCCTGTGGGGCCGCACCACCAGGACCCTTGACACTTAATAAAGACATTCGGTGTG	Zfpm1	zinc finger protein, multitype 1	chr8:124861087-124861146	NM_009569	22761	ZFPM1	13.906	14.9218	14.0084	12.5872	12.2908	12.9778
A_55_P2043013	-1.65785	6.96162	-7.90829	0.000265661	0.0101624	0.922152	NA	Agilent eArray	A930007A09Rik	RIKEN cDNA A930007A09 gene	NA	TTGGGATGCAGATGCAGGATGATTGTTGAAAGTTCAATGTCAATCAAGGCAACCTGTCTC	A930007A09Rik	RIKEN cDNA A930007A09 gene	chr16:13758571-13758628	XR_384707	432999	A930007A09RIK	7.45673	8.18588	7.72902	5.92526	6.30852	6.16432
A_55_P2262136	-1.65604	5.85402	-5.54263	0.0016664	0.0262465	-1.11084	ENSMUSG00000006386	Gencode.M18_pc	Tek	TEK receptor tyrosine kinase [Source:MGI Symbol;Acc:MGI:98664]	protein_coding	AACACCACACTGTATGAGAAGTTTACCTATGCAGGAATTGACTGCTCTGCGGAAGAAGCA	Tek	endothelial-specific receptor tyrosine kinase	chr4:94540624-94540683	NM_013690	21687	TEK	6.85147	7.18276	6.01188	5.09163	4.95468	5.03169
A_52_P49321	-1.65308	5.79175	-5.87537	0.00124494	0.0226369	-0.786479	ENSMUSG00000030022	Gencode.M18_pc	Adamts9	a disintegrin-like and metallopeptidase (reprolysin type) with thrombospondin type 1 motif, 9 [Source:MGI Symbol;Acc:MGI:1916320]	protein_coding	TCAGCATACTCAGAGAACGACAGGAGATCGACCACCTTTTACCTGAAAACTTTGGCCAAT	Adamts9	a disintegrin-like and metallopeptidase (reprolysin type) with thrombospondin type 1 motif, 9	chr6:92723110-92723051	NM_175314	101401	ADAMTS9	6.5633	7.20835	6.08323	4.94697	4.89476	5.05391
A_51_P304478	-1.65041	6.7423	-6.52714	0.00072796	0.0171463	-0.190481	ENSMUSG00000079157	Gencode.M18_pc	Fam155a	family with sequence similarity 155, member A [Source:MGI Symbol;Acc:MGI:2142765]	protein_coding	TCCTCTGCATCATGCTTAACCCTGCGACATGCGTACAGTATGCATATTTTGTTTTGAATA	Fam155a	family with sequence similarity 155, member A	chr8:9206126-9206067	NM_173446	270028	FAM155A	7.1809	8.13082	7.39079	5.82316	5.90139	6.02672
A_55_P1983508	-1.65034	7.20178	-12.2475	2.42849e-05	0.00321146	3.48144	ENSMUSG00000026826	Gencode.M18_pc	Nr4a2	nuclear receptor subfamily 4, group A, member 2 [Source:MGI Symbol;Acc:MGI:1352456]	protein_coding	AAGGGACACATAGTGTTTGTAACACCGCCCAACATTCCTTGTTTGTAAGTGTTGTATGTA	Nr4a2	nuclear receptor subfamily 4, group A, member 2	chr2:56959696-56959637	NM_013613	18227	NR4A2	7.78921	8.16503	8.12663	6.51192	6.23587	6.38204
A_52_P243516	-1.64731	9.54422	-6.24855	0.00091075	0.0192828	-0.439101	ENSMUSG00000036368	Gencode.M18_pc	Rmdn2	regulator of microtubule dynamics 2 [Source:MGI Symbol;Acc:MGI:2147043]	protein_coding	CTGCAACCTGGTTATTCCATGTCCAACTATATGTATACAGCCAAGTGTTATGTTGAACTT	Rmdn2	regulator of microtubule dynamics 2	chr17:80071699-80071847	NM_201361	381110	RMDN2	9.87483	10.931	10.2978	8.70683	8.6975	8.75737
A_55_P2005060	-1.64456	6.51382	-7.2367	0.000425155	0.0130043	0.404609	ENSMUSG00000070291	Gencode.M18_pc	Ddx43	DEAD (Asp-Glu-Ala-Asp) box polypeptide 43 [Source:MGI Symbol;Acc:MGI:3642857]	protein_coding	GTGTTGAAACATACGTCACTATGGAGAGACTTGGCTGATTCTTAAAATAATAGTGTGTTA	Ddx43	DEAD (Asp-Glu-Ala-Asp) box polypeptide 43	chr9:78271285-78271344	NM_001191044	100048658	DDX43	7.28717	7.75743	6.9637	5.44118	5.80411	5.82932
A_55_P2047768	-1.6444	14.3619	-10.2882	6.37737e-05	0.00508808	2.46751	ENSMUSG00000052180	Gencode.M18_pc	Serpinb6c	serine (or cysteine) peptidase inhibitor, clade B, member 6c [Source:MGI Symbol;Acc:MGI:2145481]	protein_coding	GTGGTTTGCCTGAAACCCAAGTGACCTTATCCATAAGTGCAATGACAGCTATGAAATAAA	Serpinb6c	serine (or cysteine) peptidase inhibitor, clade B, member 6c	chr13:33971762-33971703	NM_148942	97848	SERPINB6C	15.2215	15.069	15.2619	13.2586	13.525	13.8356
A_55_P2116973	-1.64427	6.61411	-6.49757	0.000745209	0.0173417	-0.216455	ENSMUSG00000026950	Gencode.M18_pc	Neb	nebulin [Source:MGI Symbol;Acc:MGI:97292]	protein_coding	GAAGCCTGGGACAAAGACAAGACCCAGATCCACATCATGCCTGATACACCAGAAATCATG	Neb	nebulin	chr2:52097608-52097549	NM_010889	17996	NEB	7.21827	7.99158	7.0989	5.60888	5.88548	5.88157
A_52_P137378	-1.64379	6.72702	-6.38064	0.000818193	0.0183302	-0.320121	ENSMUSG00000028518	Gencode.M18_pc	Prkaa2	protein kinase, AMP-activated, alpha 2 catalytic subunit [Source:MGI Symbol;Acc:MGI:1336173]	protein_coding	GTCTTTGTATACTTCCAAAGCTTGATCTCTGTGACCTTCACTGTTGAACCTGATTGGACA	Prkaa2	protein kinase, AMP-activated, alpha 2 catalytic subunit	chr4:104707767-104707708	NM_178143	108079	PRKAA2	7.54416	7.99909	7.10349	5.60077	6.06484	6.04976
A_55_P2148688	-1.64256	11.9626	-6.65914	0.000656381	0.0164016	-0.0757376	ENSMUSG00000028803	Gencode.M18_pc	Nipal3	NIPA-like domain containing 3 [Source:MGI Symbol;Acc:MGI:1921802]	protein_coding	CTGTGTGCAGATAACATTGTAAAGCGGTATTTAATTAAAAATCCAAGCAGTTCTTGCAGA	Nipal3	NIPA-like domain containing 3	chr4:135004866-135004807	XM_006539231	74552	NIPAL3	12.6982	13.2355	12.418	10.834	11.2424	11.3476
A_55_P2148504	-1.64209	10.2913	-6.43418	0.000783796	0.017948	-0.27246	ENSMUSG00000064201	Gencode.M18_pc	Krt2	keratin 2 [Source:MGI Symbol;Acc:MGI:96699]	protein_coding	AAGACTGGCTTCGGCTCTGGGGGTCAAAGTTCTGGAGGAAGAGGGTCTTATGGAGGACGA	Krt2	keratin 2	chr15:101642059-101642000	NM_010668	16681	KRT2	10.5711	11.4621	11.304	9.68508	9.29877	9.42706
A_52_P239320	-1.64152	6.67561	-5.93386	0.00118425	0.0220189	-0.730908	ENSMUSG00000022415	Gencode.M18_pc	Syngr1	synaptogyrin 1 [Source:MGI Symbol;Acc:MGI:1328323]	protein_coding	AGAGATCCTTTGAGAGAATCCTATTTCATCCACGGTCATGCACAGAGTGAGAGATTGGGA	Syngr1	synaptogyrin 1	chr15:79949191-79949250	NM_207708	20972	SYNGR1	7.64689	7.91722	6.92501	5.85159	5.63104	6.08192
A_51_P450888	-1.63967	7.4802	-4.99553	0.00277003	0.0352615	-1.67632	ENSMUSG00000043811	Gencode.M18_pc	Rtn4r	reticulon 4 receptor [Source:MGI Symbol;Acc:MGI:2136886]	protein_coding	TCGCGGTATATAGAGATATGAATTTTATTTTACTTGTGTAAAATATCGGATGACGTGGAA	Rtn4r	reticulon 4 receptor	chr16:18152423-18152482	NM_022982	65079	RTN4R	8.43471	8.86263	7.60276	6.81544	6.7252	6.44044
A_51_P362538	-1.63553	9.44832	-5.8199	0.00130581	0.0232421	-0.83957	ENSMUSG00000036863	Gencode.M18_pc	Syde2	synapse defective 1, Rho GTPase, homolog 2 (C. elegans) [Source:MGI Symbol;Acc:MGI:3036264]	protein_coding	TAGGTTTTAGAATGAGGGAAGGGGTTGGTTACAGCATTCCAAATATTTTAAAAATAAGGC	Syde2	synapse defective 1, Rho GTPase, homolog 2 (C. elegans)	chr3:145683843-145683902	NM_001166064	214804	SYDE2	9.95255	10.9144	9.93127	8.63614	8.72322	8.53229
A_55_P1955147	-1.63491	10.589	-4.7263	0.00360769	0.0409283	-1.97008	ENSMUSG00000039145	Gencode.M18_pc	Camk1d	calcium/calmodulin-dependent protein kinase ID [Source:MGI Symbol;Acc:MGI:2442190]	protein_coding	GGTCTATGTAGCAAATGATTCTCTGCCTTGACAATCATGTATACATATCGATTTCTATCA	Camk1d	calcium/calmodulin-dependent protein kinase ID	chr2:5214625-5214566	NM_177343	227541	CAMK1D	11.9444	10.9685	11.3064	9.30275	9.70612	10.3056
A_52_P463962	-1.63202	10.7499	-7.67282	0.000312035	0.0111103	0.745417	ENSMUSG00000096534	Gencode.M18_pc	Krtap16-3	keratin associated protein 16-3 [Source:MGI Symbol;Acc:MGI:1918619]	protein_coding	GTGGCTCTGGAAGCTATGGATATGGCTCTGGCTTCGGAGGCTTTGGATATGGCTCTGGCT	Krtap16-3	keratin associated protein 16-3	chr16:88962965-88962906	NM_183296	71369	KRTAP16-3	11.2027	11.8523	11.6426	10.2356	9.7581	9.80788
A_52_P562467	-1.63184	6.56989	-10.1252	6.96266e-05	0.00528783	2.37382	ENSMUSG00000001333	Gencode.M18_pc	Sync	syncoilin [Source:MGI Symbol;Acc:MGI:1916078]	protein_coding	GGATCCACAACTTTGTGCTACAGGTATTAGATTTTAAGACTCTGCTCACAAAGCCATCTT	Sync	syncoilin	chr4:128985686-128985745	NM_023485	68828	SYNC	7.19214	7.49669	7.46861	5.7607	6.00991	5.49131
A_55_P2013038	-1.63003	13.3672	-9.03029	0.000130068	0.00711758	1.70121	ENSMUSG00000052180	Gencode.M18_pc	Serpinb6c	serine (or cysteine) peptidase inhibitor, clade B, member 6c [Source:MGI Symbol;Acc:MGI:2145481]	protein_coding	CAAGTGACCTTATCCATAAGTGCAATGACAGCTATGAAATAAAGGGCTTAATGGCACCCC	Serpinb6c	serine (or cysteine) peptidase inhibitor, clade B, member 6c	chr13:33971745-33971686	NM_148942	97848	SERPINB6C	14.2736	14.0802	14.1929	12.1899	12.6058	12.8609
A_55_P2145506	-1.62588	11.4602	-9.89134	7.91475e-05	0.00552447	2.23668	ENSMUSG00000110206	Gencode.M18_pc	Flt3l	FMS-like tyrosine kinase 3 ligand [Source:MGI Symbol;Acc:MGI:95560]	protein_coding	CTATATACAACAAGGCTTTCTTTTCTTCTTTCTTGGTGCTAGAGTTGGGAACCAAAACAA	Flt3l	FMS-like tyrosine kinase 3 ligand	chr7:52386843-52386784	XM_006540608	14256	FLT3L	12.3372	12.3838	12.0986	10.6661	10.3614	10.9143
A_55_P2047345	-1.62529	8.02417	-16.0775	5.2706e-06	0.00164204	5.00598	ENSMUSG00000069835	Gencode.M18_pc	Sat2	spermidine/spermine N1-acetyl transferase 2 [Source:MGI Symbol;Acc:MGI:1916465]	protein_coding	AGAAGCCTTATTAGGAACCACAAATAAAATACTTGCTTTGCCCTCATGGGTAGAGGATGT	Sat2	spermidine/spermine N1-acetyl transferase 2	chr11:69437312-69437371	NM_026991	69215	SAT2	9.018	8.72029	8.77216	7.19632	7.17349	7.26476
A_66_P108810	-1.62408	5.96454	-6.96113	0.000521126	0.0144995	0.179724	ENSMUSG00000042453	Gencode.M18_pc	Reln	reelin [Source:MGI Symbol;Acc:MGI:103022]	protein_coding	TAATTTTGAATCAGCAAGAGTCACTGAAGCCAACTGGGAAACCATCCAGGGTGGAGTGAT	Reln	reelin	chr5:21404974-21404915	NM_001310464	19699	RELN	6.75668	7.18854	6.38453	4.91312	5.15544	5.38894
A_55_P2170225	-1.62041	9.13656	-8.54737	0.000175104	0.00834646	1.37805	ENSMUSG00000032261	Gencode.M18_pc	Sh3bgrl2	SH3 domain binding glutamic acid-rich protein like 2 [Source:MGI Symbol;Acc:MGI:1915350]	protein_coding	CTAGTTGGTGTTAAGCCCGATCCACGTAAAATTCCATTTGATAAATCCCAGGGAGTTTCC	Sh3bgrl2	SH3 domain binding glutamic acid-rich protein like 2	chr9:83492485-83492544	NM_172507	212531	SH3BGRL2	9.76301	10.1142	9.96308	7.94766	8.52293	8.50847
A_51_P104392	-1.61975	7.4181	-5.41187	0.00187531	0.0281793	-1.24228	ENSMUSG00000062309	Gencode.M18_pc	Rpp25	ribonuclease P/MRP 25 subunit [Source:MGI Symbol;Acc:MGI:2143151]	protein_coding	TAACTGAGAGCGGGAGCTACGGAGCTGATTACTTGAGGATGGCCAAGTTGAAAATGTCCG	Rpp25	ribonuclease P/MRP 25 subunit	chr9:57353026-57353085	NM_133982	102614	RPP25	8.25815	8.60922	7.81654	7.13793	6.38921	6.29753
A_52_P487599	-1.61851	6.40189	-6.36657	0.000827516	0.0184364	-0.332696	ENSMUSG00000054474	Agilent eArray	Thnsl2	threonine synthase-like 2 (bacterial)	protein_coding	TGGAAAGATTGTGTAGTGAACCCCTCAGAATAGACAGGCTGGAATGGGATTGAAGACTCT	Thnsl2	threonine synthase-like 2 (bacterial)	chr6:71078656-71078597	NM_178413	232078	THNSL2	6.86639	7.75818	7.00887	5.48178	5.80241	5.4937
A_55_P2096558	-1.6172	6.42275	-10.3576	6.14595e-05	0.00505016	2.50688	ENSMUSG00000032899	Gencode.M18_pc	Styk1	serine/threonine/tyrosine kinase 1 [Source:MGI Symbol;Acc:MGI:2141396]	protein_coding	AATCACCATCAATTGTAGTTTGCTTTCCAGTCCCAAGGGCTGAAGTATAAGTGGTGGACC	Styk1	serine/threonine/tyrosine kinase 1	chr6:131250211-131250152	NM_172891	243659	STYK1	7.26647	6.95017	7.4774	5.46131	5.66283	5.71829
A_51_P209183	-1.61468	5.78227	-6.42913	0.000786965	0.0179695	-0.276937	ENSMUSG00000021508	Gencode.M18_pc	Cxcl14	chemokine (C-X-C motif) ligand 14 [Source:MGI Symbol;Acc:MGI:1888514]	protein_coding	CCTCATTAGAGGCCGCACTGTATGGCTGTGTATCTGCTATGTAAATGCTGAGACCCCTGA	Cxcl14	chemokine (C-X-C motif) ligand 14	chr13:56390137-56390078	NM_019568	57266	CXCL14	6.39125	6.23861	7.13898	4.9267	4.85097	5.14712
A_66_P106113	-1.61463	11.7106	-4.45726	0.00474472	0.0481924	-2.27428	ENSMUSG00000046768	Gencode.M18_pc	Rhoj	ras homolog family member J [Source:MGI Symbol;Acc:MGI:1931551]	protein_coding	AAGTTTGGCCAAAGATCATCCCACAAATGGTTCAGAAGATAGGGGGACTGCTCTTGCAAA	Rhoj	ras homolog family member J	chr12:76501927-76501986	NM_023275	80837	RHOJ	12.189	12.854	12.5107	11.2392	10.1395	11.3311
A_51_P278034	-1.61427	10.7937	-4.55426	0.00429341	0.0453579	-2.16336	ENSMUSG00000051502	Gencode.M18_pc	Ufsp1	UFM1-specific peptidase 1 [Source:MGI Symbol;Acc:MGI:1917490]	protein_coding	ACACTACTGGGGCACTCCAAAAAACCGTTGTGAACTACAAGCTGCTGGATGGGTGGGCTG	Ufsp1	UFM1-specific peptidase 1	chr5:137736545-137736604	NM_027356	70240	UFSP1	11.5037	12.3548	10.944	9.87267	9.93563	10.1514
A_55_P2074647	-1.61413	12.0674	-8.44439	0.00018692	0.0085435	1.30683	ENSMUSG00000009894	Gencode.M18_pc	Snap47	synaptosomal-associated protein, 47 [Source:MGI Symbol;Acc:MGI:1915076]	protein_coding	GTGGACCGGGCAACCCTGAATGTGGACAAGCAAAACCGGCGTATGAGAAAGCTGATGTAG	Snap47	synaptosomal-associated protein, 47	chr11:59221225-59221166	NM_144521	67826	SNAP47	12.8274	12.569	13.2271	11.0578	11.3393	11.384
A_55_P2278604	-1.61359	6.58427	-8.22793	0.000214914	0.00911612	1.15438	ENSMUSG00000097915	Gencode M18	A330009N23Rik	RIKEN cDNA A330009N23 gene [Source:MGI Symbol;Acc:MGI:2443491]	antisense	CCCAGTGAGTCAGTTACTTCAGGGCACAGAACTAGCAAGGATGAATAAATAGCTCTATGG	A330009N23Rik	RIKEN cDNA A330009N23 gene	chr15:101051686-101051627	NR_045326	380977	A330009N23RIK	7.23815	7.79327	7.14177	5.95906	5.72049	5.65286
A_55_P2082653	-1.61298	5.7194	-10.2038	6.67309e-05	0.00520822	2.41917	ENSMUSG00000025529	Gencode.M18_pc	Zfp711	zinc finger protein 711 [Source:MGI Symbol;Acc:MGI:3045342]	protein_coding	GTGGCTGTAAATGATGTACACGCTGTAAAATAAGATTGTTACTGTTACGTGGACTTATTA	Zfp711	zinc finger protein 711	chrX:109748561-109748620	NM_177747	245595	ZFP711	6.41613	6.80875	6.35278	4.72018	4.95958	5.05896
A_52_P496956	-1.6112	10.4285	-12.0442	2.66587e-05	0.00334165	3.38494	ENSMUSG00000032281	Gencode.M18_pc	Acsbg1	acyl-CoA synthetase bubblegum family member 1 [Source:MGI Symbol;Acc:MGI:2385656]	protein_coding	TGACATCTCCAATGCCTTCACGTGCAAGTAGTTTCAATTCTAACCACTGCTCCTGTTCAG	Acsbg1	acyl-CoA synthetase bubblegum family member 1	chr9:54453069-54453010	NM_053178	94180	ACSBG1	11.2367	11.4229	11.0426	9.69114	9.4437	9.73385
A_51_P451516	-1.61057	8.115	-6.16011	0.000979481	0.0200157	-0.519912	ENSMUSG00000019467	Gencode.M18_pc	Arhgef25	Rho guanine nucleotide exchange factor (GEF) 25 [Source:MGI Symbol;Acc:MGI:1277173]	protein_coding	AGGATGAGGGCAGGGACCAGATAGAAATTATTGGCCTGGGTTGTGATTTTGTTTTCGAGT	Arhgef25	Rho guanine nucleotide exchange factor (GEF) 25	chr10:126619670-126619611	NM_028027	52666	ARHGEF25	8.93626	9.36573	8.45886	7.60011	7.06646	7.26257
A_55_P2032192	-1.61017	12.6811	-6.63162	0.000670605	0.016489	-0.099497	ENSMUSG00000032366	Gencode.M18_pc	Tpm1	tropomyosin 1, alpha [Source:MGI Symbol;Acc:MGI:98809]	protein_coding	GAAAACCTTAGTATGCACCAGATGCTGGATCAGACTTTACTGGAGCTAAACAACATGTGA	Tpm1	tropomyosin 1, alpha	chr9:66871225-66871166	NM_001164249	22003	TPM1	13.3755	13.9738	13.1094	12.0306	11.6434	11.9542
A_55_P1959606	-1.60827	12.7891	-5.67262	0.00148476	0.0247448	-0.982433	ENSMUSG00000020541	Gencode.M18_pc	Tom1l1	target of myb1-like 1 (chicken) [Source:MGI Symbol;Acc:MGI:1919193]	protein_coding	CATCAGGTGGCCTAAGATGTAGTTAGTCCTATGTAATGTTTAACATTCTTGCCTTTTATT	Tom1l1	target of myb1-like 1 (chicken)	chr11:90507151-90507092	NM_028011	71943	TOM1L1	13.3492	14.2315	13.1991	12.073	11.824	12.058
A_55_P2049005	-1.60552	7.26192	-7.95982	0.000256609	0.010039	0.960182	ENSMUSG00000032079	Gencode.M18_pc	Apoa5	apolipoprotein A-V [Source:MGI Symbol;Acc:MGI:1913363]	protein_coding	CCAGATTCCTCATGCCTGCTTGACTCTCTTCTTGGGATTGATAAAAACTCTCTCTTTGAG	Apoa5	apolipoprotein A-V	chr9:46079943-46080002	NM_001348095	66113	APOA5	8.09852	8.41487	7.68065	6.60075	6.29634	6.48038
A_51_P118132	-1.60499	10.7184	-7.07911	0.000477258	0.0138092	0.276938	ENSMUSG00000027660	Gencode.M18_pc	Skil	SKI-like [Source:MGI Symbol;Acc:MGI:106203]	protein_coding	TGCCAATGCATATAGTTTTATGATTAAAATTGCTGTGGTTGGTTGCATTACATGACACAC	Skil	SKI-like	chr3:31021203-31021262	NM_011386	20482	SKIL	11.5253	11.1474	11.89	9.80004	9.73412	10.2136
A_55_P2079890	-1.60344	9.96512	-7.8714	0.000272369	0.0102566	0.894785	ENSMUSG00000100605	Gencode M18	Gm29243	predicted gene 29243 [Source:MGI Symbol;Acc:MGI:5579949]	lincRNA	CCAAGGTCTTTCAAGATATGCAAATGAAGCATCCTTTTTAAATTCAAATTGTGGCATAGC	Gm29243	predicted gene 29243	chr8:35289094-35289153	XR_378865	102636691	GM29243	10.7979	10.4728	11.0298	8.87022	9.45099	9.169
A_55_P1978316	-1.60115	7.94305	-6.32962	0.000852595	0.0187025	-0.365838	ENSMUSG00000059901	Gencode.M18_pc	Adamts14	a disintegrin-like and metallopeptidase (reprolysin type) with thrombospondin type 1 motif, 14 [Source:MGI Symbol;Acc:MGI:2179942]	protein_coding	TCAAGTCATGTGTGGACCGGCCTGGAGATGCTGATTTTTAAAACGTTACCTATTTATTAA	Adamts14	a disintegrin-like and metallopeptidase (reprolysin type) with thrombospondin type 1 motif, 14	chr10:60659919-60659860	NM_001081127	237360	ADAMTS14	8.50345	9.2993	8.42813	7.25961	6.95545	7.21238
A_55_P1959718	-1.60103	10.9286	-7.37849	0.000383835	0.0124022	0.51739	ENSMUSG00000034903	Gencode.M18_pc	Cobll1	Cobl-like 1 [Source:MGI Symbol;Acc:MGI:2442894]	protein_coding	GGAGTATCTGTCATCCTGACACATAGGAACCTTTTTCCGTTTAATAAAAGCAAGTTATAT	Cobll1	Cobl-like 1	chr2:64926473-64926414	NM_177025	319876	COBLL1	11.7702	11.4463	11.9708	9.91283	10.522	9.94935
A_55_P2119761	-1.5988	11.2564	-8.78012	0.000151454	0.00770588	1.53598	ENSMUSG00000058172	Gencode.M18_pc	Krtap6-1	keratin associated protein 6-1 [Source:MGI Symbol;Acc:MGI:1330228]	protein_coding	TATGGCTGTGGCTATGGATGTGGCTCTGGCTATGGCTCTGGATTTGGCTACTACTACTGA	Gm10228	predicted gene 10228	chr16:89041482-89041423	NM_001270487	100040214	KRTAP6-1	11.7771	12.2564	12.134	10.7435	10.2586	10.3689
A_66_P102260	-1.59855	12.3154	-7.44977	0.00036483	0.0121139	0.573358	ENSMUSG00000038894	Gencode.M18_pc	Irs2	insulin receptor substrate 2 [Source:MGI Symbol;Acc:MGI:109334]	protein_coding	TGGAGCTTTGCCCTCTGCCAGCACCTATGCAAGCATCGACTTCCTGTCCCATCACTTGAA	Irs2	insulin receptor substrate 2	chr8:11004549-11004490	NM_001081212	384783	IRS2	13.0878	13.4702	12.7858	11.2233	11.6814	11.6436
A_51_P196925	-1.59832	7.37362	-5.9996	0.00112007	0.0214006	-0.668961	ENSMUSG00000031778	Gencode.M18_pc	Cx3cl1	chemokine (C-X3-C motif) ligand 1 [Source:MGI Symbol;Acc:MGI:1097153]	protein_coding	TCCCAGAGCAGAATGTGGGCCGTAACAATCTGAGGAGGACTTTAAAAGTTGTTGATCCTT	Cx3cl1	chemokine (C-X3-C motif) ligand 1	chr8:97306185-97306244	NM_009142	20312	CX3CL1	7.86779	8.02285	8.62771	6.32888	6.40832	6.98619
A_55_P2027278	-1.59731	14.0953	-4.77114	0.00345004	0.0400196	-1.92042	ENSMUSG00000034201	Gencode.M18_pc	Gas2l1	growth arrest-specific 2 like 1 [Source:MGI Symbol;Acc:MGI:1926176]	protein_coding	AGCCAGACCTCAATGCTCTGAACCTGCATATACCAGAACAAGAAACCCTTAAATTGTGCA	Gas2l1	growth arrest-specific 2 like 1	chr11:4960443-4960384	NM_144560	78926	GAS2L1	14.9127	15.431	14.3383	12.8862	13.296	13.7078
A_52_P577388	-1.59681	9.57489	-4.89152	0.00306417	0.037361	-1.78855	ENSMUSG00000002808	Gencode.M18_pc	Epdr1	ependymin related protein 1 (zebrafish) [Source:MGI Symbol;Acc:MGI:2145369]	protein_coding	TCGCTGTGTTTTATTTGCCATGTATCATCTTTTGTTATCAAGAGAAGTGTATGATGCTTG	Epdr1	ependymin related protein 1 (zebrafish)	chr13:19683822-19683763	NM_134065	105298	EPDR1	10.2477	10.9628	9.90939	8.73679	8.40489	9.18779
A_55_P1963434	-1.5898	6.65187	-5.51595	0.00170677	0.0265819	-1.13748	ENSMUSG00000031119	Gencode.M18_pc	Gpc4	glypican 4 [Source:MGI Symbol;Acc:MGI:104902]	protein_coding	TCCTAGTGACTTTGCTTTTTAAATGAATGGACAACAATGTACAGTTTTTACTGTGTGGCC	Gpc4	glypican 4	chrX:49406619-49406560	NM_008150	14735	GPC4	7.09473	7.78382	7.46175	6.04789	5.31881	6.20421
A_55_P2172822	-1.58869	10.5306	-8.2746	0.000208487	0.00898058	1.18757	ENSMUSG00000054619	Gencode.M18_pc	Mettl7a1	methyltransferase like 7A1 [Source:MGI Symbol;Acc:MGI:1916523]	protein_coding	TGAGACAGCGCCATCTCCTGGAACCTACAGACAACAACAGCTGCCTTCCTCCAAAAATCT	Mettl7a1	methyltransferase like 7A1	chr15:100158687-100158746	XM_011245728	70152	METTL7A1	11.198	11.21	11.5668	9.89195	9.37461	9.94215
A_51_P415220	-1.58858	10.4804	-5.9232	0.00119505	0.022099	-0.741004	ENSMUSG00000027663	Gencode.M18_pc	Zmat3	zinc finger matrin type 3 [Source:MGI Symbol;Acc:MGI:1195270]	protein_coding	TCCTTCAGCCTAATAAATACAGAAGTCTGAATGTTATTTAAGCTTAGACCACTTACGTTG	Zmat3	zinc finger matrin type 3	chr3:32233890-32233831	NM_009517	22401	ZMAT3	11.2469	11.6061	10.9711	9.19656	10.0446	9.81719
A_55_P1953301	-1.58789	14.6663	-5.22577	0.00222653	0.0312386	-1.43331	ENSMUSG00000027227	Gencode.M18_pc	Sord	sorbitol dehydrogenase [Source:MGI Symbol;Acc:MGI:98266]	protein_coding	ATCATGGCCCAGACCTGAGCTTTCTCAAACTGCTTCGCATAATAAACTGTTGATGGTGTC	Sord	sorbitol dehydrogenase	chr2:122091013-122091072	NM_146126	20322	SORD	15.7777	15.7966	14.8063	13.7404	13.7184	14.1582
A_51_P449233	-1.58661	5.9999	-4.74246	0.00354996	0.0406371	-1.95215	ENSMUSG00000032289	Gencode.M18_pc	Thsd4	thrombospondin, type I, domain containing 4 [Source:MGI Symbol;Acc:MGI:2672033]	protein_coding	TGTCACCACACAGTTCTTAAGAAGGACAATGATCCTCTTGTAAGTGAGTGTAGGTCAGAG	Thsd4	thrombospondin, type I, domain containing 4	chr9:59818131-59818072	NM_172444	207596	THSD4	6.48357	7.55631	6.33973	5.02452	5.30527	5.28998
A_55_P2143934	-1.58593	10.8545	-7.2879	0.000409667	0.0128018	0.445558	ENSMUSG00000043661	Gencode M18	Gm9785	predicted pseudogene 9785 [Source:MGI Symbol;Acc:MGI:3641899]	transcribed_processed_pseudogene	GAACAGAGGTCTTGTCACCCCCACTCCAAGCCTCTCCTGTAATTGCCACTGCGAACTTAG	NA	NA	chrX:100721363-100721304	BC147682	NA	GM9785	12.0248	11.6258	11.2918	10.3013	9.84104	10.0422
A_55_P2108248	-1.58558	8.99149	-7.4552	0.000363428	0.0120896	0.577598	ENSMUSG00000030217	Gencode.M18_pc	Art4	ADP-ribosyltransferase 4 [Source:MGI Symbol;Acc:MGI:1202710]	protein_coding	GCCTGAACCAGATAGTCAGCTTCATCATTTTCATGGATTAATAAATGATATCTGTGCTAA	Art4	ADP-ribosyltransferase 4	chr6:136797033-136796974	NM_026639	109978	ART4	9.60865	10.0747	9.66949	8.08627	7.93069	8.57914
A_55_P1953851	-1.58282	9.92486	-5.58414	0.00160576	0.0258413	-1.0696	ENSMUSG00000027030	Gencode.M18_pc	Stk39	serine/threonine kinase 39 [Source:MGI Symbol;Acc:MGI:1858416]	protein_coding	CCATTCCATTCTGTTGTTTACACAATTACTCAAAGATGACTGCAAAGGTAAACGGAAAAA	Stk39	serine/threonine kinase 39	chr2:68048583-68048524	NM_016866	53416	STK39	10.6254	11.3139	10.2095	9.06726	9.03989	9.29319
A_52_P663904	-1.57998	5.64292	-8.86027	0.000144185	0.00754807	1.58942	ENSMUSG00000041700	Gencode.M18_pc	Lhfpl1	lipoma HMGIC fusion partner-like 1 [Source:MGI Symbol;Acc:MGI:1891214]	protein_coding	CCGGAGGTAATGCAAACATGCGGGAATGTCTCCAATCAATTTCAGTTAGGAACCTGTAGA	Lhfpl1	lipoma HMGIC fusion partner-like 1	chrX:141761430-141725860	NM_178358	237091	LHFPL1	6.77415	6.42922	6.09536	4.77027	4.87352	4.915
A_66_P140185	-1.57984	6.807	-9.78981	8.37488e-05	0.00569022	2.17608	ENSMUSG00000020599	Gencode.M18_pc	Rgs9	regulator of G-protein signaling 9 [Source:MGI Symbol;Acc:MGI:1338824]	protein_coding	TATAGACTTTGCTATCTCAGCACTCAGGGGCAGCTCATTCCATGCCTTGAGGTCCGACAA	Rgs9	regulator of G-protein signaling 9	chr11:109096441-109096382	NM_001165934	19739	RGS9	7.66527	7.83385	7.29166	6.0129	6.15659	5.88176
A_51_P514913	-1.57886	8.60614	-4.96421	0.00285506	0.0358768	-1.70995	ENSMUSG00000039096	Gencode.M18_pc	Rsad1	radical S-adenosyl methionine domain containing 1 [Source:MGI Symbol;Acc:MGI:3039628]	protein_coding	TCCCATCGCCTGATAATCATTTGACCAGTGACTTTAGCACCTACTAGTGATTCTTTCCCA	Rsad1	radical S-adenosyl methionine domain containing 1	chr11:94402166-94402107	NM_001013381	237926	RSAD1	9.08687	10.1171	8.98271	7.95797	7.63579	7.85636
A_51_P370678	-1.57811	12.2242	-4.39596	0.00505762	0.0497738	-2.34512	ENSMUSG00000026815	Gencode.M18_pc	Gfi1b	growth factor independent 1B [Source:MGI Symbol;Acc:MGI:1276578]	protein_coding	AGCCATGATAGTAGAAGCCTGCTCCTATCAGTTGATGTAAATGTAAATAAAGGTGGGTTT	Gfi1b	growth factor independent 1B	chr2:28465041-28464982	NM_008114	14582	GFI1B	12.8826	13.5534	12.6038	11.4992	10.8566	11.9496
A_52_P602669	-1.57702	9.6304	-8.83028	0.000146857	0.00761691	1.56948	ENSMUSG00000047889	Gencode.M18_pc	Serpinb6d	serine (or cysteine) peptidase inhibitor, clade B, member 6d [Source:MGI Symbol;Acc:MGI:2667783]	protein_coding	AATATCTTCCAAGCAAGACTTGTTTCTGTCCAAGGTCATACATAAGGCCTTTATGGAAGT	Serpinb6d	serine (or cysteine) peptidase inhibitor, clade B, member 6d	chr13:33763131-33763190	NM_001076790	238568	SERPINB6D	10.5908	10.2928	10.3731	8.51712	8.86906	9.13951
A_55_P2136935	-1.57397	6.04111	-5.01804	0.00271067	0.0349579	-1.65222	ENSMUSG00000021719	Gencode.M18_pc	Rgs7bp	regulator of G-protein signalling 7 binding protein [Source:MGI Symbol;Acc:MGI:106334]	protein_coding	CCATTTTAAATGATTTCACACTTGAAAGCAGCTGCCATCAAGGAAAAGAGAAAGAAAGAA	Rgs7bp	regulator of G-protein signalling 7 binding protein	chr13:105741432-105741373	NM_029879	52882	RGS7BP	6.49643	7.55502	6.43285	5.18883	5.37528	5.19826
A_55_P2032916	-1.57125	8.03334	-4.91385	0.00299812	0.0369538	-1.76432	ENSMUSG00000036814	Gencode.M18_pc	Slc6a20a	solute carrier family 6 (neurotransmitter transporter), member 20A [Source:MGI Symbol;Acc:MGI:2143217]	protein_coding	AGTCAGCCACTCTGTTTCACAGTCACTGCCTGCTGGTGGGAACTTCTTGGCTGGAGTGCT	Slc6a20a	solute carrier family 6 (neurotransmitter transporter), member 20A	chr9:123546090-123546031	NM_139142	102680	SLC6A20A	8.54451	8.35816	9.55423	7.28364	7.1302	7.32931
A_55_P2001593	-1.5689	11.1715	-13.7586	1.26699e-05	0.0024045	4.14456	ENSMUSG00000021720	Gencode.M18_pc	Rnf180	ring finger protein 180 [Source:MGI Symbol;Acc:MGI:1919066]	protein_coding	AGACAACCCCGCAAGCACTCCCTGCCCACTGTGCCGGACAATTATTTCTAGAGTCTTTCT	Rnf180	ring finger protein 180	chr13:105971597-105971538	NM_027934	71816	RNF180	12.1186	11.9715	11.7779	10.4881	10.2844	10.3887
A_51_P313157	-1.56499	6.15514	-7.46361	0.000361268	0.0120441	0.584167	ENSMUSG00000033542	Gencode.M18_pc	Arhgef5	Rho guanine nucleotide exchange factor (GEF) 5 [Source:MGI Symbol;Acc:MGI:1858952]	protein_coding	ATGGTACTTGTACATCATCTGCTACTACAGTGCAGATTCAGAGCTGGCCGGATGTAAGTT	Arhgef5	Rho guanine nucleotide exchange factor (GEF) 5	chr6:43239039-43239098	NM_133674	54324	ARHGEF5	6.74317	7.30659	6.76316	5.35068	5.64963	5.11763
A_52_P517029	-1.56232	5.69255	-6.64504	0.000663624	0.0164548	-0.0878993	ENSMUSG00000026109	Gencode.M18_pc	Tmeff2	transmembrane protein with EGF-like and two follistatin-like domains 2 [Source:MGI Symbol;Acc:MGI:1861735]	protein_coding	ATAACCATCATGCAAGTGTTGCTATGAATCACTCTCTTGATAGATAGATATGACAAATCC	Tmeff2	transmembrane protein with EGF-like and two follistatin-like domains 2	chr1:51243808-51243867	NM_019790	56363	TMEFF2	6.3353	6.99613	6.08969	4.91064	4.96058	4.86295
A_55_P2102693	-1.56122	9.03143	-8.65925	0.000163238	0.00806145	1.45448	ENSMUSG00000026836	Gencode.M18_pc	Acvr1	activin A receptor, type 1 [Source:MGI Symbol;Acc:MGI:87911]	protein_coding	ATTAAGACAGTGGCTCTCTGCGTATCTTTCGCGGGTCTCCTAGACACTCCCCACGGGAAG	Acvr1	activin A receptor, type 1	chr2:58299639-58299580	NM_001110204	11477	ACVR1	9.42162	10.0181	9.99642	8.14229	8.32824	8.28194
A_55_P2066727	-1.55974	14.7342	-9.36694	0.00010659	0.00635902	1.91651	ENSMUSG00000060147	Gencode.M18_pc	Serpinb6a	serine (or cysteine) peptidase inhibitor, clade B, member 6a [Source:MGI Symbol;Acc:MGI:103123]	protein_coding	AAGTGACCTTATCCATAAGTGCAATGGCAATTATGAAATAAAGGGCTTTATGGCACCCCA	Serpinb6a	serine (or cysteine) peptidase inhibitor, clade B, member 6a	chr13:34009855-34009796	NM_001164118	20719	SERPINB6A	15.5189	15.4201	15.6033	13.6228	14.0089	14.2312
A_51_P163252	-1.55892	8.64487	-6.63343	0.000669659	0.016489	-0.0979334	ENSMUSG00000102422	Gencode.M18_pc	Iqschfp	Iqcj and Schip1 fusion protein [Source:MGI Symbol;Acc:MGI:5439400]	protein_coding	CATAAGCGAATGTTTGATGAAAAGAAGCTTAAAGCCCACCGACCTGAGAGACATGACTAT	Schip1	schwannomin interacting protein 1	chr3:68422535-68422594	NM_013928	30953	IQSCHFP	9.5397	9.77292	8.96037	8.04936	7.62668	7.92018
A_52_P504268	-1.55824	6.84806	-6.97278	0.000516592	0.0144071	0.18939	ENSMUSG00000043300	Gencode.M18_pc	B3galnt1	UDP-GalNAc:betaGlcNAc beta 1,3-galactosaminyltransferase, polypeptide 1 [Source:MGI Symbol;Acc:MGI:1349405]	protein_coding	TTAATGTGGCGTTAATGTGACATCAAAGGTTATTACTGACTGTCCGTAATCTGTTGAACT	B3galnt1	UDP-GalNAc:betaGlcNAc beta 1,3-galactosaminyltransferase, polypeptide 1	chr3:69378208-69378149	NM_020026	26879	B3GALNT1	7.60616	7.27028	8.0051	5.90107	5.94633	6.3594
A_55_P2280821	-1.55681	6.04552	-6.6303	0.000671295	0.016489	-0.100638	ENSMUSG00000031523	Gencode.M18_pc	Dlc1	deleted in liver cancer 1 [Source:MGI Symbol;Acc:MGI:1354949]	protein_coding	GGAAGAGGTTTATAATTTGCCCTATATCTGTACAGAGTATATTCGGTAAGTGCACTATTA	Dlc1	deleted in liver cancer 1	chr8:37631452-37631393	NM_001194940	50768	DLC1	6.45481	6.92969	7.08727	5.02699	5.65156	5.1228
A_55_P2100155	-1.55647	7.01452	-11.579	3.31855e-05	0.00369901	3.15704	ENSMUSG00000018411	Gencode.M18_pc	Mapt	microtubule-associated protein tau [Source:MGI Symbol;Acc:MGI:97180]	protein_coding	ATGATTTCTTTGGTGATTTTGAGGGTGGGGGGAGGGACACAAATCAGCTTAGCTTAGCTT	Mapt	microtubule-associated protein tau	chr11:104193241-104193300	NM_001285455	17762	MAPT	7.54288	7.94927	7.88612	6.17738	6.16074	6.37074
A_51_P244824	-1.55591	13.1928	-8.17414	0.000222607	0.00931195	1.1159	ENSMUSG00000028159	Gencode.M18_pc	Dapp1	dual adaptor for phosphotyrosine and 3-phosphoinositides 1 [Source:MGI Symbol;Acc:MGI:1347063]	protein_coding	AGGGGGCAATGGTTTTCACTTTTCTCAGTGTGACCAAGATGCTTGTTCCAACATTGTACC	Dapp1	dual adaptor for phosphotyrosine and 3-phosphoinositides 1	chr3:137594708-137594649	NM_011932	26377	DAPP1	14.0137	14.2757	13.623	12.4431	12.2235	12.5781
A_55_P2159189	-1.54782	13.8593	-11.7133	3.1126e-05	0.003557	3.2239	ENSMUSG00000028223	Gencode.M18_pc	Decr1	2,4-dienoyl CoA reductase 1, mitochondrial [Source:MGI Symbol;Acc:MGI:1914710]	protein_coding	GCTACAGATGGACCGTGGTCTTCCACTTGTCTTGGGGGTTAATAAATTGTTTGCTTGATG	Decr1	2,4-dienoyl CoA reductase 1, mitochondrial	chr4:15846134-15846075	NM_026172	67460	DECR1	14.4342	14.8617	14.6038	13.128	13.1696	12.9587
A_55_P2133534	-1.54633	5.93829	-7.17144	0.000445889	0.0132508	0.352041	ENSMUSG00000042156	Gencode.M18_pc	Dzip1	DAZ interacting protein 1 [Source:MGI Symbol;Acc:MGI:1914311]	protein_coding	TATTTTTTATACTTTGTAGAACTATTAGGACTATCTCCAAAAACAAAAAAGGAACCTATT	Dzip1	DAZ interacting protein 1	chr14:119275603-119275544	NM_025943	66573	DZIP1	6.87371	7.02192	6.23873	5.07467	5.13967	5.28103
A_51_P237752	-1.54172	10.4416	-6.84476	0.000569026	0.0152167	0.0824322	ENSMUSG00000004044	Gencode.M18_pc	Cavin1	caveolae associated 1 [Source:MGI Symbol;Acc:MGI:1277968]	protein_coding	TGGGTAAGTGTTGGATGAGGTCCTCTGTGCTGATGGGCTAATGTTGTGGGCAGATGCAGT	Cavin1	caveolae associated 1	chr11:100818188-100818129	NM_008986	19285	CAVIN1	10.8302	11.3121	11.495	9.63971	9.97581	9.3966
A_55_P1961241	-1.5417	5.6844	-8.03083	0.000244716	0.00974186	1.0122	NA	Agilent eArray	Gm32139	predicted gene, 32139	NA	GGGTGTTTAAACTTAGCTATACTGACTAATCGCTCTCTAATAAACCACTAAAAGTTACAC	Gm32139	predicted gene, 32139	chr18:45717782-45717723	XR_386205	102634598	GM32139	6.53952	6.77577	6.05047	4.9961	4.89751	4.84703
A_55_P2048041	-1.53756	8.02373	-4.52613	0.00441911	0.0461744	-2.19539	ENSMUSG00000028412	Gencode.M18_pc	Slc44a1	solute carrier family 44, member 1 [Source:MGI Symbol;Acc:MGI:2140592]	protein_coding	TGATACAAAATACAATGATGGGAGCCCTGGCCGAGAATTCTATATGGACAAAGTGCTGAT	Slc44a1	solute carrier family 44, member 1	chr4:53573963-53574022	NM_133891	100434	SLC44A1	8.72706	9.44163	8.20885	6.93559	7.26561	7.56365
A_55_P2090817	-1.53727	9.9587	-4.50823	0.00450124	0.0467226	-2.21583	ENSMUSG00000068205	Gencode.M18_pc	Macrod2	MACRO domain containing 2 [Source:MGI Symbol;Acc:MGI:1920149]	protein_coding	GCCAAAACCTAAAACATACAGTCTGTGTGTTTATCACTAGACCTTTGTAATGTATTTCTC	Macrod2	MACRO domain containing 2	chr2:140246100-140246159	NM_028387	72899	MACROD2	10.4265	11.4886	10.267	9.3823	8.96376	9.22413
A_55_P2179314	-1.53613	9.10306	-4.44479	0.00480656	0.0484878	-2.28865	ENSMUSG00000078850	Gencode M18	Gm2348	predicted pseudogene 2348 [Source:MGI Symbol;Acc:MGI:3780518]	processed_pseudogene	TATCTGATCTTGTTTTCCAGTCCATTTTGAACCAAGAAAGACTCATTGAAGACTCCTTGA	Macrod2	MACRO domain containing 2	chr2:140245667-140245726	NM_028387	72899	GM2348	9.55768	10.6636	9.39208	8.48294	8.19031	8.33174
A_51_P379976	-1.53587	12.0119	-4.55714	0.00428081	0.045344	-2.16009	ENSMUSG00000047446	Gencode.M18_pc	Arl4a	ADP-ribosylation factor-like 4A [Source:MGI Symbol;Acc:MGI:99437]	protein_coding	TGGAATAGGTTTTCCTGGGTCTGATTTCTGACAAGCTGAAGAGTGTCTACAGCCTGGTTT	Arl4a	ADP-ribosylation factor-like 4A	chr12:40762706-40762647	NM_001039515	11861	ARL4A	12.4547	13.467	12.4177	11.5136	10.8542	11.3639
A_51_P340170	-1.53395	6.45183	-10.3678	6.11285e-05	0.00504642	2.51263	ENSMUSG00000020007	Gencode.M18_pc	Il20ra	interleukin 20 receptor, alpha [Source:MGI Symbol;Acc:MGI:3605069]	protein_coding	TGGGGACTTTATACAGAAGAGCTCACCATGATCCCAGTTTATTATTTTCTAACAGTTATT	Il20ra	interleukin 20 receptor, alpha	chr10:19479702-19479761	NM_172786	237313	IL20RA	7.30219	7.40961	6.94461	5.67591	5.55284	5.8258
A_51_P469951	-1.53205	8.5522	-4.9678	0.00284518	0.0358128	-1.70609	ENSMUSG00000030257	Gencode.M18_pc	Srgap3	SLIT-ROBO Rho GTPase activating protein 3 [Source:MGI Symbol;Acc:MGI:2152938]	protein_coding	CTCGTTCCAGGCAGTGTGACTGTTTACATGGTTTGGCAATAGGTTTGCTTCTGATTGCTT	Srgap3	SLIT-ROBO Rho GTPase activating protein 3	chr6:112668298-112668239	NM_080448	259302	SRGAP3	9.42264	9.83466	8.69737	7.81317	7.52343	8.0219
A_51_P275949	-1.53135	6.0737	-6.6142	0.000679798	0.0165946	-0.114589	ENSMUSG00000034205	Gencode.M18_pc	Loxl2	lysyl oxidase-like 2 [Source:MGI Symbol;Acc:MGI:2137913]	protein_coding	TGAAGTGCCAGAATCAGATTTCTCTAACAACATCATGAAGTGCAGGAGCCGCTATGATGG	Loxl2	lysyl oxidase-like 2	chr14:70092141-70092200	NM_033325	94352	LOXL2	7.25341	6.38191	6.88283	5.17124	5.27841	5.47443
A_51_P169415	-1.53094	6.50237	-5.05866	0.00260723	0.0342525	-1.60894	ENSMUSG00000022438	Gencode.M18_pc	Parvb	parvin, beta [Source:MGI Symbol;Acc:MGI:2153063]	protein_coding	AAGGCACGCCCTGAAGATGTGGTGAACTTGGACCTCAAGTCCACTCTGCGGGTCCTTTAC	Parvb	parvin, beta	chr15:84143190-84143428	NM_133167	170736	PARVB	6.87219	7.92054	7.0108	5.81606	5.47374	5.9209
A_51_P462918	-1.5305	7.59285	-7.98228	0.000252776	0.00993173	0.976684	ENSMUSG00000022853	Gencode.M18_pc	Ehhadh	enoyl-Coenzyme A, hydratase/3-hydroxyacyl Coenzyme A dehydrogenase [Source:MGI Symbol;Acc:MGI:1277964]	protein_coding	ATGGCCAGATTTCAGGAATGTGTTTTCTATACCTCTGACGGTACTTCTATCAGAAAAATT	Ehhadh	enoyl-Coenzyme A, hydratase/3-hydroxyacyl Coenzyme A dehydrogenase	chr16:21761973-21761914	NM_023737	74147	EHHADH	8.19204	8.71111	8.17116	6.59684	7.03619	6.84978
A_66_P107129	-1.52852	9.29617	-4.92008	0.00298001	0.0368191	-1.75758	ENSMUSG00000096965	Gencode M18	3300005D01Rik	RIKEN cDNA 3300005D01 gene [Source:MGI Symbol;Acc:MGI:1925762]	lincRNA	ATAATCAGGAAGGGGTTTGAGATAGCTGCCTTGTGTTTCCAGGCCAGTCCATCTCAAAAT	3300005D01Rik	RIKEN cDNA 3300005D01 gene	chr17:5803166-5803225	NR_045080	78512	3300005D01RIK	9.62228	9.77573	10.7833	8.57844	8.47889	8.5384
A_66_P136801	-1.52841	10.2603	-8.79092	0.000150451	0.00770588	1.54321	ENSMUSG00000106847	Gencode M18	Peg13	paternally expressed 13 [Source:MGI Symbol;Acc:MGI:2663476]	sense_intronic	AAGCTTCCTGTGGAGGGGGTCCCCATTGGATTCATTGATGTGTACTATGTATTTGTTATA	Peg13	paternally expressed 13	chr15:72636131-72636072	NR_002864	353342	PEG13	10.8538	11.3812	10.8385	9.36736	9.4827	9.63826
A_55_P2010401	-1.5252	6.62669	-6.49294	0.000747955	0.0173417	-0.220534	ENSMUSG00000021699	Gencode.M18_pc	Pde4d	phosphodiesterase 4D, cAMP specific [Source:MGI Symbol;Acc:MGI:99555]	protein_coding	GCAGGATGCTTCTGAGTAGCAACATCCCCAAACAGCGCCGCTTCACAGTGGCACATACAT	Pde4d	phosphodiesterase 4D, cAMP specific	chr13:110051079-110051138	XM_006517644	238871	PDE4D	7.22876	7.22106	7.71807	5.91634	6.21027	5.46567
A_55_P2141938	-1.52246	11.8979	-7.21406	0.000432218	0.0130878	0.386423	ENSMUSG00000073155	Gencode M18	1810058I24Rik	RIKEN cDNA 1810058I24 gene [Source:MGI Symbol;Acc:MGI:1914955]	lincRNA	CAGTGATATGACTGCGTTTTCAAAAAACCACTTACTGTGAGCTCTTGGCGAAATCTTCGC	1810058I24Rik	RIKEN cDNA 1810058I24 gene	chr6:35202985-35203044	NR_027875	67705	1810058I24RIK	12.4345	13.0871	12.4559	10.9336	11.1523	11.3242
A_55_P1979645	-1.52102	12.9395	-6.34758	0.000840295	0.0185975	-0.349705	ENSMUSG00000044080	Gencode.M18_pc	S100a1	S100 calcium binding protein A1 [Source:MGI Symbol;Acc:MGI:1338917]	protein_coding	AAGGAACTGGATGAAAACGGAGATGGGGAAGTGGACTTCAAGGAGTATGTTGTGCTGGTG	S100a1	S100 calcium binding protein A1	chr3:90315250-90315191	NM_011309	20193	S100A1	13.775	13.261	14.064	11.9042	12.413	12.2198
A_52_P574720	-1.52028	11.4933	-6.58776	0.000694021	0.0167835	-0.137543	ENSMUSG00000009654	Gencode.M18_pc	Oit3	oncoprotein induced transcript 3 [Source:MGI Symbol;Acc:MGI:1201782]	protein_coding	GACTAAGAGCATAACTCATGATCTCCTAGATACCTAATAATTGTGACCTAAAATCTCAAC	Oit3	oncoprotein induced transcript 3	chr10:58886313-58886254	NM_010959	18302	OIT3	12.1427	11.9136	12.7041	10.5999	10.9861	10.6136
A_55_P1967022	-1.51986	7.49992	-4.64828	0.00390195	0.0428081	-2.05719	ENSMUSG00000031565	Gencode.M18_pc	Fgfr1	fibroblast growth factor receptor 1 [Source:MGI Symbol;Acc:MGI:95522]	protein_coding	AGACCTACGTTCAAGCAGTTGGTGGAAGACCTGGACCGCATTGTGGCCTTGACCTCCAAC	Fgfr1	fibroblast growth factor receptor 1	chr8:26684061-26684120	NM_010206	14182	FGFR1	8.4813	7.5528	8.74547	6.51771	6.97656	6.72571
A_51_P309733	-1.51984	14.8043	-5.79223	0.00133745	0.0234845	-0.866193	ENSMUSG00000032323	Gencode.M18_pc	Cyp11a1	cytochrome P450, family 11, subfamily a, polypeptide 1 [Source:MGI Symbol;Acc:MGI:88582]	protein_coding	CATCCTCCTTATCAATCTGCTGGAGAACTTCAGAATTGAAGTTCAAAATCTCCGTGATGT	Cyp11a1	cytochrome P450, family 11, subfamily a, polypeptide 1	chr9:57874074-57874544	NM_019779	13070	CYP11A1	15.7113	15.8932	15.0882	14.4009	13.781	13.9512
A_52_P672689	-1.51976	5.89958	-6.97273	0.000516612	0.0144071	0.189347	ENSMUSG00000082361	Gencode.M18_pc	Btc	betacellulin, epidermal growth factor family member [Source:MGI Symbol;Acc:MGI:99439]	protein_coding	GGATCCTTGTACATTTTACTTTACAAGAGAGATTCCATAGATTCAAACAAATGCCTGAAC	Btc	betacellulin, epidermal growth factor family member	chr5:91787007-91786948	NM_007568	12223	BTC	6.61955	7.1015	6.25733	5.18842	5.20175	5.02893
A_55_P2250391	-1.51632	6.10637	-5.87533	0.00124497	0.0226369	-0.78651	ENSMUSG00000027799	Gencode.M18_pc	Nbea	neurobeachin [Source:MGI Symbol;Acc:MGI:1347075]	protein_coding	GTACATTTACCCAGGATGTGATGCTGGCATTAGAGCGATGGATTTATCCCATGACCAAAG	Nbea	neurobeachin	chr3:55432423-55432364	NM_030595	26422	NBEA	7.12425	7.19834	6.27101	5.28389	5.42957	5.33118
A_55_P1970120	-1.51363	13.8281	-9.32025	0.000109532	0.00643097	1.88712	ENSMUSG00000037788	Gencode.M18_pc	Vopp1	vesicular, overexpressed in cancer, prosurvival protein 1 [Source:MGI Symbol;Acc:MGI:2141658]	protein_coding	GCAGACTTGTGCATGCTCTTTCTTGGCAACACTTGGCTCATATTTCTTGTTCTCTTTTGA	Vopp1	vesicular, overexpressed in cancer, prosurvival protein 1	chr6:57702368-57702309	NM_146168	232023	VOPP1	14.2692	14.6622	14.8234	13.0061	12.9904	13.2174
A_55_P1969477	-1.5127	7.33193	-6.41605	0.000795253	0.0180143	-0.288561	ENSMUSG00000040584	Gencode.M18_pc	Abcb1a	ATP-binding cassette, sub-family B (MDR/TAP), member 1A [Source:MGI Symbol;Acc:MGI:97570]	protein_coding	ACTCAGACATGGGCACCTGAGTTCAGATCCCTACCACCTAAGTAAGCAGCAAGGTGTGGT	Abcb1a	ATP-binding cassette, sub-family B (MDR/TAP), member 1A	chr5:8748075-8748134	NM_011076	18671	ABCB1A	7.76785	7.88023	8.61675	6.61693	6.65285	6.45697
A_55_P2036240	-1.51128	11.2835	-6.1031	0.00102695	0.0204183	-0.572493	ENSMUSG00000021417	Gencode M18	Eci2	enoyl-Coenzyme A delta isomerase 2 [Source:MGI Symbol;Acc:MGI:1346064]	protein_coding	TTTGAGATAAGGGCCTCCTGGAACAACCTCAGAATGAACCGGGTACACTGCCAAATAATA	Eci2	enoyl-Coenzyme A delta isomerase 2	chr13:35097399-35097340	AK141540	23986	ECI2	12.188	11.5113	12.4181	10.5363	10.3623	10.685
A_55_P1983036	-1.51015	11.8637	-6.21126	0.00093903	0.0195497	-0.473063	ENSMUSG00000022019	Gencode.M18_pc	Tdrd3	tudor domain containing 3 [Source:MGI Symbol;Acc:MGI:2444023]	protein_coding	CGATAGAGCAAAATATCTTTACAAGTGGAAAACTTCTTCTGCCATCAATAAAAGCATTGC	Tdrd3	tudor domain containing 3	chr14:87945240-87945299	NM_172605	219249	TDRD3	12.4279	13.1725	12.256	11.0697	11.1109	11.1454
A_65_P12530	-1.50553	9.23324	-7.44271	0.000366663	0.012141	0.567835	ENSMUSG00000021699	Agilent eArray	Pde4d	phosphodiesterase 4D, cAMP specific	protein_coding	TGCCAATTCATGTAAAATAAAGAATCCATGTCTCTCGAAAATTGTTTTTGTGTGTCCACG	Pde4d	phosphodiesterase 4D, cAMP specific	chr13:110745631-110745690	NM_011056	238871	PDE4D	9.7297	10.3104	9.91789	8.21792	8.75546	8.46804
A_66_P131754	-1.50493	8.76809	-9.62799	9.17425e-05	0.00592418	2.07813	ENSMUSG00000023186	Gencode.M18_pc	Vwa5a	von Willebrand factor A domain containing 5A [Source:MGI Symbol;Acc:MGI:1915026]	protein_coding	GGTTTTTCTGGGATATATAAGAGATGGGAAAAATAATGTTGAAACTTTGCTTCTTCCACC	Vwa5a	von Willebrand factor A domain containing 5A	chr9:38550667-38550726	NM_172767	67776	VWA5A	9.54391	9.59437	9.4234	7.68847	8.14842	8.20999
A_55_P1979330	-1.50481	14.0916	-4.94715	0.00290263	0.0362397	-1.72832	ENSMUSG00000028159	Gencode.M18_pc	Dapp1	dual adaptor for phosphotyrosine and 3-phosphoinositides 1 [Source:MGI Symbol;Acc:MGI:1347063]	protein_coding	ATGGTCAGCACAACTAAACTTCAGGACTTGCTACAAGCACAAGGAAACAGCAGTGCATCA	Dapp1	dual adaptor for phosphotyrosine and 3-phosphoinositides 1	chr3:137595763-137595704	NM_011932	26377	DAPP1	14.9341	15.3749	14.223	13.3933	13.1047	13.5196
A_55_P2035579	-1.50366	7.60222	-7.7877	0.000288329	0.0106582	0.832258	ENSMUSG00000023809	Gencode.M18_pc	Rps6ka2	ribosomal protein S6 kinase, polypeptide 2 [Source:MGI Symbol;Acc:MGI:1342290]	protein_coding	TCTTTCAGTAATGTGAGGTTACCTGCTTTACACTCAGCCTACTCTTGCCAAAGGGATGGA	Gm36117	predicted gene, 36117	chr17:13231828-13231887	XR_876415	102639918	RPS6KA2	8.1425	8.1324	8.78725	6.78075	6.89	6.88042
A_55_P2137211	-1.50139	8.33464	-5.74243	0.00139664	0.024007	-0.914365	ENSMUSG00000007613	Gencode.M18_pc	Tgfbr1	transforming growth factor, beta receptor I [Source:MGI Symbol;Acc:MGI:98728]	protein_coding	CTTTTTATCTCATATGTGCAGATCTTGCAACTGCTTGATTTACATGGTAGCAATGAATTC	Tgfbr1	transforming growth factor, beta receptor I	chr4:47424946-47425005	NM_009370	21812	TGFBR1	9.07665	9.56772	8.61164	7.67627	7.74682	7.32876
A_55_P2029488	-1.49968	6.77152	-5.07479	0.00256741	0.0339442	-1.59182	ENSMUSG00000074388	Gencode M18	Gm5544	predicted gene 5544 [Source:MGI Symbol;Acc:MGI:3648209]	lincRNA	TAAAAAGTCTGATTGCTTGCAATAAACTTGTCTCAACCTTAGGTTTTCGGAGACCCCTTC	Gm5544	predicted gene 5544	chr3:97770882-97770941	NM_001033779	433632	GM5544	7.45837	8.14333	6.96238	5.96006	5.97426	6.13072
A_52_P344290	-1.49768	16.2662	-7.23299	0.000426305	0.0130104	0.401628	ENSMUSG00000048376	Gencode.M18_pc	F2r	coagulation factor II (thrombin) receptor [Source:MGI Symbol;Acc:MGI:101802]	protein_coding	TTTCCAAATACTGTAGAGTCGCTTCCACGAAAGTCCTATGGTTGTATGGTTAACTTGGTT	F2r	coagulation factor II (thrombin) receptor	chr13:96371961-96371902	NM_010169	14062	F2R	17.1516	17.1043	16.7892	15.7891	15.1087	15.6542
A_55_P1971094	-1.49605	5.76759	-6.49648	0.000745855	0.0173417	-0.217415	ENSMUSG00000023443	Gencode.M18_pc	Esx1	extraembryonic, spermatogenesis, homeobox 1 [Source:MGI Symbol;Acc:MGI:1096388]	protein_coding	GCATTACCTGTCAAGAAGCTGTTAAACGAAATGTACAAAGTTAATGCCTTCTTTGTTTTG	Esx1	extraembryonic, spermatogenesis, homeobox 1	chrX:133650024-133649965	NM_007957	13984	ESX1	6.49229	6.98404	6.07052	4.99242	4.97957	5.08672
A_55_P2046807	-1.49588	5.59389	-6.0266	0.00109486	0.0211592	-0.643663	ENSMUSG00000018593	Gencode.M18_pc	Sparc	secreted acidic cysteine rich glycoprotein [Source:MGI Symbol;Acc:MGI:98373]	protein_coding	ACAGCAATGTGAAGAGCTTGACAAGTCTTTCAAAATAAAAAGTAACAACTTAGAAACGGC	Sparc	secreted acidic cysteine rich glycoprotein	chr11:55208061-55208002	NM_009242	20692	SPARC	6.03886	6.90646	6.08018	4.78804	4.9613	4.78853
A_51_P240253	-1.49451	7.85456	-4.96335	0.00285745	0.0358768	-1.71088	ENSMUSG00000031880	Gencode.M18_pc	Rrad	Ras-related associated with diabetes [Source:MGI Symbol;Acc:MGI:1930943]	protein_coding	CATCGAGACATCAGCAGCACTGCATCACAATGTCCAGGCACTATTCGAGGGGGTTGTGCG	Rrad	Ras-related associated with diabetes	chr8:107152591-107152532	NM_019662	56437	RRAD	8.25955	8.65265	8.89325	7.63316	6.58887	7.09989
A_55_P2066463	-1.49335	12.9398	-13.6435	1.32808e-05	0.00240556	4.0972	ENSMUSG00000022995	Gencode.M18_pc	Enah	ENAH actin regulator [Source:MGI Symbol;Acc:MGI:108360]	protein_coding	TGTCTAGATGAGTCTGCACGTTTTCCATAATCCATTGCTAAAATAAAGACGAGAAAGGCT	Enah	enabled homolog (Drosophila)	chr1:183835703-183835644	NM_010135	13800	ENAH	13.4982	13.8605	13.7008	12.224	12.1393	12.2162
A_51_P201661	-1.49302	10.1538	-5.08267	0.00254822	0.0337842	-1.58347	ENSMUSG00000026187	Gencode.M18_pc	Xrcc5	X-ray repair complementing defective repair in Chinese hamster cells 5 [Source:MGI Symbol;Acc:MGI:104517]	protein_coding	AAATTGTTGTTCAGGATGGAGTTACTCTGATCACCAAAGACGAAGCCCCAGGAAGCTCTA	Xrcc5	X-ray repair complementing defective repair in Chinese hamster cells 5	chr1:72430014-72430320	NM_009533	22596	XRCC5	10.7809	11.519	10.4011	9.3746	9.60312	9.24421
A_55_P2024704	-1.49164	7.1995	-10.7086	5.1147e-05	0.00462558	2.70193	ENSMUSG00000037852	Gencode.M18_pc	Cpe	carboxypeptidase E [Source:MGI Symbol;Acc:MGI:101932]	protein_coding	GGGTTTTGTCTTGATTGTAGATTGGCCCAGAATTGCATTCTGATGAATAAAGGCAAAAAA	Cpe	carboxypeptidase E	chr8:67071408-67071349	NM_013494	12876	CPE	8.21753	7.83999	7.77843	6.56405	6.3591	6.43787
A_51_P460710	-1.49156	11.3879	-6.74973	0.000611946	0.0158028	0.00191874	ENSMUSG00000022019	Gencode.M18_pc	Tdrd3	tudor domain containing 3 [Source:MGI Symbol;Acc:MGI:2444023]	protein_coding	AAAGAGGCAGATATTAGGGAAACGATTCAATTTACACAAGGCAATGGGGGGAAATACTGA	Tdrd3	tudor domain containing 3	chr14:87945177-87945236	BC005670	219249	TDRD3	12.0857	12.5933	11.722	10.5847	10.6521	10.6895
A_55_P1954555	-1.48997	6.24967	-4.88183	0.00309333	0.0375533	-1.79909	ENSMUSG00000115333	Gencode M18	Gm34590	predicted gene, 34590 [Source:MGI Symbol;Acc:MGI:5593749]	lincRNA	TAAACGGCATTTGATGGATCCAAGAAGGCAGAGCCACGGATGCCTGGAGAGATGGAGAAG	NA	NA	chr15:36878868-36878927	BY718677	NA	GM34590	6.76935	7.68518	6.52943	5.42102	5.4544	5.63864
A_55_P2097665	-1.48954	11.3799	-4.46935	0.00468566	0.0477745	-2.26039	ENSMUSG00000047446	Gencode.M18_pc	Arl4a	ADP-ribosylation factor-like 4A [Source:MGI Symbol;Acc:MGI:99437]	protein_coding	CTGCAGTTCAACGAATTTGTAAATACCGTACCTACCAAAGGATTTAACACTGAGAAAATT	Arl4a	ADP-ribosylation factor-like 4A	chr12:40763216-40763157	NM_001039515	11861	ARL4A	11.9571	12.8378	11.5791	10.81	10.3957	10.6997
A_55_P2131168	-1.48934	7.52867	-4.61862	0.00402089	0.0437552	-2.09054	ENSMUSG00000051111	Gencode.M18_pc	Sv2c	synaptic vesicle glycoprotein 2c [Source:MGI Symbol;Acc:MGI:1922459]	protein_coding	AATCCATGATGATAGGCATGCTGTGCTTGTATAATGGGCTGACCATCTCAGCGTGGAATT	Sv2c	synaptic vesicle glycoprotein 2c	chr13:96746045-96745986	NM_029210	75209	SV2C	8.24501	8.6754	7.89961	7.37021	6.33682	6.64496
A_51_P113178	-1.4892	7.026	-9.11067	0.000123957	0.0069084	1.75334	ENSMUSG00000048458	Gencode.M18_pc	Inka2	inka box actin regulator 2 [Source:MGI Symbol;Acc:MGI:1923497]	protein_coding	CAGGCACTGTCTCATGAGTCCAAGTAGGCGTGCCCAACCAGCATGGTATTTCATAAAGCA	Fam212b	family with sequence similarity 212, member B	chr3:105520821-105520880	NM_175398	109050	INKA2	7.63683	8.12358	7.55139	6.21824	6.2896	6.33638
A_55_P2090484	-1.48747	7.11427	-7.53945	0.000342446	0.0117286	0.643093	ENSMUSG00000023868	Gencode.M18_pc	Pde10a	phosphodiesterase 10A [Source:MGI Symbol;Acc:MGI:1345143]	protein_coding	AGCAAGAGCACACCTGAGAAGCTGAACGTGAAGGTTGAAGACTGATCCTGAAGTGACGTC	Pde10a	phosphodiesterase 10A	chr17:9174477-9174536	NM_001290707	23984	PDE10A	7.72947	8.29431	7.55023	6.34185	6.37446	6.39529
A_51_P164939	-1.48592	7.18704	-19.67	1.68022e-06	0.00108656	6.0589	ENSMUSG00000055912	Gencode.M18_pc	Tmem150a	transmembrane protein 150A [Source:MGI Symbol;Acc:MGI:2385244]	protein_coding	ATTTTGTACCAAAAACAAGTTTTAGAGAGTATTGTTGGGATCTAGGCTTCCTTACTTCTG	Tmem150a	transmembrane protein 150A	chr6:72309303-72309362	NM_144916	232086	TMEM150A	7.86002	7.9682	7.96179	6.40382	6.52041	6.40802
A_52_P343298	-1.48497	6.66466	-5.17511	0.0023348	0.0321966	-1.48615	ENSMUSG00000025813	Gencode.M18_pc	Homer2	homer scaffolding protein 2 [Source:MGI Symbol;Acc:MGI:1347354]	protein_coding	TGTGTCCAGCCAGTCACTGATTCTTTTTATCCTAATCCTTTTGGTCTGAATTTCATTTGC	Homer2	homer scaffolding protein 2	chr7:88747222-88747163	NM_011983	26557	HOMER2	7.22047	8.04857	6.9524	6.05088	5.84884	5.86679
A_51_P405397	-1.48358	13.9285	-4.9004	0.00303771	0.0372526	-1.77891	ENSMUSG00000028108	Gencode.M18_pc	Ecm1	extracellular matrix protein 1 [Source:MGI Symbol;Acc:MGI:103060]	protein_coding	GTCCAAGGAAGAATGAGTCACCCTGAGCCTCAGAGGATTAGATGGGGGAACTCCGCCCTA	Ecm1	extracellular matrix protein 1	chr3:95538178-95538120	NM_007899	13601	ECM1	15.0237	13.9604	15.0269	13.2141	13.1997	13.1464
A_52_P476754	-1.48316	14.7132	-4.60743	0.00406683	0.0441092	-2.10315	ENSMUSG00000032020	Gencode.M18_pc	Ubash3b	ubiquitin associated and SH3 domain containing, B [Source:MGI Symbol;Acc:MGI:1920078]	protein_coding	AAGCAGTTAAGGAGATTGACATTTGAAAGGATGTTATGTTGGATTCACTATTTGGATCAG	Ubash3b	ubiquitin associated and SH3 domain containing, B	chr9:40822158-40822099	NM_176860	72828	UBASH3B	15.2184	16.1044	15.0414	13.5953	14.1799	14.1395
A_55_P2422248	-1.48273	7.53001	-5.86698	0.00125392	0.0227038	-0.794476	ENSMUSG00000097766	Gencode M18	5730420D15Rik	RIKEN cDNA 5730420D15 gene [Source:MGI Symbol;Acc:MGI:1917773]	bidirectional_promoter_lncRNA	ACATATTTCTTCCAACAAGGCTGTTTTACCCCACTAAACATCTCTACAACCAAGTATTCG	5730420D15Rik	RIKEN cDNA 5730420D15 gene	chr10:94891216-94891274	NR_045338	70523	5730420D15RIK	8.54556	7.7082	8.56037	6.77514	6.94102	6.64979
A_55_P2155546	-1.48138	12.4751	-5.98996	0.00112922	0.0215074	-0.678005	ENSMUSG00000049871	Gencode.M18_pc	Nlrc3	NLR family, CARD domain containing 3 [Source:MGI Symbol;Acc:MGI:2444070]	protein_coding	TACCATCAGTCTCTGTAGTGTTCCTGCCCTGCACACTCCCATGGCTGGCACCATGAGTCT	Nlrc3	NLR family, CARD domain containing 3	chr16:3947020-3946961	NM_001081280	268857	NLRC3	13.7089	13.1575	12.7808	11.7282	11.5651	11.9098
A_55_P1975215	-1.47909	7.06078	-11.7732	3.02567e-05	0.00353814	3.25341	ENSMUSG00000045903	Gencode.M18_pc	Npas4	neuronal PAS domain protein 4 [Source:MGI Symbol;Acc:MGI:2664186]	protein_coding	CTCGTGGTGCTGCGGTGACTTTGTAGCCAACTTTATAATAAAGTCCAGTTTGCCTTTTTG	Npas4	neuronal PAS domain protein 4	chr19:4984415-4984356	NM_153553	225872	NPAS4	7.81171	7.88272	7.70655	6.15296	6.25542	6.55533
A_55_P2096402	-1.47814	8.49066	-12.5189	2.14909e-05	0.0030894	3.60739	ENSMUSG00000026490	Gencode.M18_pc	Cdc42bpa	CDC42 binding protein kinase alpha [Source:MGI Symbol;Acc:MGI:2441841]	protein_coding	TTTTAACCACATAGCACACATGGGTCCTGGAGATGGAATACAGATCCTAAAAGACCTGCC	Cdc42bpa	CDC42 binding protein kinase alpha	chr1:182081345-182081404	NM_001033285	226751	CDC42BPA	9.21316	9.41547	9.06057	7.85431	7.76361	7.63687
A_55_P2018929	-1.4775	12.5182	-5.16874	0.00234881	0.0322501	-1.49281	ENSMUSG00000040447	Gencode.M18_pc	Spns2	spinster homolog 2 [Source:MGI Symbol;Acc:MGI:2384936]	protein_coding	GCTGCTGATTGTGAATCTCAAAGTCTTAAGAGAGAAGCCAAATATATATTCCTCTTGTAA	Spns2	spinster homolog 2	chr11:72265226-72265167	NM_153060	216892	SPNS2	13.5729	13.568	12.6299	11.7982	11.567	11.9731
A_55_P2000553	-1.47745	11.7717	-5.63585	0.00153373	0.0251767	-1.01853	ENSMUSG00000019558	Gencode.M18_pc	Slc6a8	solute carrier family 6 (neurotransmitter transporter, creatine), member 8 [Source:MGI Symbol;Acc:MGI:2147834]	protein_coding	GGGACATTCTTACTGTGCTAAAAAAGCCACTGCAAACATAGCAATAAAAACACTTCATTT	Slc6a8	solute carrier family 6 (neurotransmitter transporter, creatine), member 8	chrX:70927775-70927834	NM_133987	102857	SLC6A8	12.1979	12.4237	12.9096	10.6573	11.0155	11.426
A_52_P708792	-1.47651	10.371	-4.63951	0.0039367	0.0430719	-2.06704	ENSMUSG00000104835	Gencode M18	Gm5547	predicted gene 5547 [Source:MGI Symbol;Acc:MGI:3648206]	lincRNA	GGCTTGTCAGTAAAGTTAAGAATGCCTTAAATCATTCCTCTCTTACTCTATTCATAGAAG	Gm5547	predicted gene 5547	chr3:105620189-105620248	NR_045845	433637	GM5547	10.7532	11.8207	10.7539	9.40944	9.68256	9.8063
A_55_P2046877	-1.47449	6.58003	-5.74351	0.00139532	0.024007	-0.913317	ENSMUSG00000038415	Gencode.M18_pc	Foxq1	forkhead box Q1 [Source:MGI Symbol;Acc:MGI:1298228]	protein_coding	TGTAACTTTACAGAGGATCAAAGCCGTTCTTTTCCATTTCTTGGCCAGGCCTGTACTCTC	Foxq1	forkhead box Q1	chr13:31652206-31652265	NM_008239	15220	FOXQ1	7.12301	6.9578	7.87101	5.64966	5.88179	5.99689
A_65_P01991	-1.47427	7.34776	-4.51402	0.00447446	0.0465246	-2.2092	ENSMUSG00000027171	Gencode.M18_pc	Prrg4	proline rich Gla (G-carboxyglutamic acid) 4 (transmembrane) [Source:MGI Symbol;Acc:MGI:2442211]	protein_coding	AAAGATTTGCTTGTTCAGCTTCTTATGACACATTGCAAGGAATAAAGGAATGATGCATAC	Prrg4	proline rich Gla (G-carboxyglutamic acid) 4 (transmembrane)	chr2:104672660-104672601	NM_178695	228413	PRRG4	7.68962	8.83578	7.72926	6.76862	6.5777	6.48555
A_55_P2049532	-1.47388	8.60654	-8.301	0.000204952	0.00893947	1.20626	ENSMUSG00000021451	Gencode.M18_pc	Sema4d	sema domain, immunoglobulin domain (Ig), transmembrane domain (TM) and short cytoplasmic domain, (semaphorin) 4D [Source:MGI Symbol;Acc:MGI:109244]	protein_coding	AACGCACAGCACCTACTGCACCAAGCTATTGTGTCTTGGCTGGCTCCACACTGCCATTCG	NA	NA	chr13:51781521-51781462	XM_006516891	NA	SEMA4D	9.48746	9.00144	9.54154	7.81725	8.06619	7.72535
A_55_P2288983	-1.47352	6.073	-4.69459	0.00372412	0.0416718	-2.00537	ENSMUSG00000054385	Gencode.M18_pc	Ceacam2	carcinoembryonic antigen-related cell adhesion molecule 2 [Source:MGI Symbol;Acc:MGI:1347246]	protein_coding	AAGATGACAACCTCTCAGGCGGGACTCATCCTCAAAATAGACCCTATTAAGAGGGAAGAT	Ceacam2	carcinoembryonic antigen-related cell adhesion molecule 2	chr7:26312895-26312836	NM_007543	26367	CEACAM2	6.60637	7.50589	6.31701	5.3012	5.20005	5.50746
A_55_P2244722	-1.47167	9.98426	-6.13549	0.000999665	0.0202652	-0.542574	ENSMUSG00000047242	Gencode.M18_pc	Taf9b	TATA-box binding protein associated factor 9B [Source:MGI Symbol;Acc:MGI:3039562]	protein_coding	GCATGATGACGACGATGACAATGACACCATGTAAGGAATAAAGTCTGTTCTGCATACATT	Taf9b	TATA-box binding protein associated factor 9B	chrX:103403866-103403807	NM_001001176	407786	TAF9B	10.6072	11.2294	10.3237	9.38942	9.12969	9.22618
A_52_P514352	-1.47079	8.93689	-6.04576	0.00107738	0.0210401	-0.625774	ENSMUSG00000023243	Gencode.M18_pc	Kcnk5	potassium channel, subfamily K, member 5 [Source:MGI Symbol;Acc:MGI:1336175]	protein_coding	AATATTTTTTAATGAACTGTTATTTTTATACCCAGAGCCAGTAAAGAACAGGGTCCCTGC	Kcnk5	potassium channel, subfamily K, member 5	chr14:20959743-20959684	NM_021542	16529	KCNK5	9.91088	9.80749	9.29848	8.59541	7.8813	8.12776
A_55_P2074353	-1.4697	6.51261	-4.46612	0.00470135	0.0479071	-2.26409	ENSMUSG00000030554	Gencode.M18_pc	Synm	synemin, intermediate filament protein [Source:MGI Symbol;Acc:MGI:2661187]	protein_coding	TGGCAAAATCACAGTTATGAAGTGGCAATGGCGTGATTTTATGGTTGGGGGTCAGCACAA	Synm	synemin, intermediate filament protein	chr7:74877165-74877106	NM_201639	233335	SYNM	7.32556	7.87367	6.54315	5.73663	5.74604	5.85059
A_52_P190763	-1.4666	6.10524	-6.72454	0.000623943	0.0159288	-0.0195849	ENSMUSG00000039545	Gencode M18	Flicr	Foxp3 regulating long intergenic noncoding RNA [Source:MGI Symbol;Acc:MGI:1925435]	antisense	ATCAAGTTCCAGAGGAGTCTCCAAGTCCTAGAACTTCTATGACACTGTTGGCTTCAGGAA	Flicr	Foxp3 regulating long intergenic noncoding RNA	chrX:7155269-7155328	NR_029473	78185	FLICR	6.91852	7.21691	6.38019	5.4794	5.33752	5.29888
A_55_P2004536	-1.46543	5.88278	-7.87506	0.000271694	0.0102418	0.897511	ENSMUSG00000079852	Gencode.M18_pc	Klra4	killer cell lectin-like receptor, subfamily A, member 4 [Source:MGI Symbol;Acc:MGI:101904]	protein_coding	GTATTTGTGGGAAGAGATTGGACAAATTCCCTCATTGACTCTCCAGTGAGTGTTAAAAGT	Klra4	killer cell lectin-like receptor, subfamily A, member 4	chr6:129994094-129994035	NM_010649	16635	KLRA4	6.21089	6.89375	6.74187	5.12959	5.09621	5.22439
A_52_P619248	-1.46488	6.46011	-4.59772	0.00410717	0.0442684	-2.11412	ENSMUSG00000055360	Gencode.M18_pc	Prl2c5	prolactin family 2, subfamily c, member 5 [Source:MGI Symbol;Acc:MGI:1858413]	protein_coding	CAGTCCAGAACGGGGTTAATGCCCTCATGAGCACCATGAATGGAGATGAAGAAAATAAGA	Prl2c5	prolactin family 2, subfamily c, member 5	chr13:13282998-13283933	NM_181852	107849	PRL2C5	6.82314	6.83355	7.92095	5.68266	5.89977	5.60056
A_55_P2078680	-1.46243	11.3567	-4.84897	0.00319463	0.0382828	-1.83492	ENSMUSG00000032366	Gencode.M18_pc	Tpm1	tropomyosin 1, alpha [Source:MGI Symbol;Acc:MGI:98809]	protein_coding	GGAAGAACAGTTAAGAATAATGGATCAGACCTTGAAAGCATTAATGGCTGCAGAGGATAA	Tpm1	tropomyosin 1, alpha	chr9:66880333-66880274	NM_001164251	22003	TPM1	12.0175	12.6804	11.5658	10.8147	10.3433	10.7184
A_55_P2152607	-1.46096	7.62978	-8.30015	0.000205065	0.00893947	1.20566	ENSMUSG00000066071	Gencode.M18_pc	Cyp4a12a	cytochrome P450, family 4, subfamily a, polypeptide 12a [Source:MGI Symbol;Acc:MGI:88612]	protein_coding	CCTTTCAGCTTACATTTAAGAGTCTTGCCATCTTCCCCACAATAAAGTTCATAATGTGGC	Cyp4a12b	cytochrome P450, family 4, subfamily a, polypeptide 12B	chr4:115111580-115111639	NM_172306	13118	CYP4A12A	8.19569	8.22934	8.65575	6.64029	6.99496	7.06263
A_52_P413515	-1.45989	10.6871	-4.50322	0.00452453	0.0469106	-2.22156	ENSMUSG00000025997	Gencode.M18_pc	Ikzf2	IKAROS family zinc finger 2 [Source:MGI Symbol;Acc:MGI:1342541]	protein_coding	CTCAGGAACAAGCATATAATTTGTCCAAGATTTATTTCTTCTCAGAAGTGTAAGTGCAGT	Ikzf2	IKAROS family zinc finger 2	chr1:69577912-69577853	NM_011770	22779	IKZF2	11.4147	11.9962	10.8402	10.221	9.59926	10.0512
A_55_P1979650	-1.45895	12.399	-6.13772	0.000997814	0.0202503	-0.540515	ENSMUSG00000044080	Gencode.M18_pc	S100a1	S100 calcium binding protein A1 [Source:MGI Symbol;Acc:MGI:1338917]	protein_coding	GGGCACAAGAGTGGCAGTCCAGATCTGCCACTTGTTTTAATAAAGCCTTCTCTCTCACCA	S100a1	S100 calcium binding protein A1	chr3:90315018-90314959	NM_011309	20193	S100A1	13.315	12.6276	13.4428	11.456	11.8081	11.7445
A_51_P370510	-1.45893	8.67611	-10.9968	4.41671e-05	0.00428111	2.85699	ENSMUSG00000037594	Gencode.M18_pc	Clba1	clathrin binding box of aftiphilin containing 1 [Source:MGI Symbol;Acc:MGI:2443738]	protein_coding	TCACAGTTGGATCCATGAGTTCAGAAGTCAGAAGATAGCTGCTGATCACTTGCAGGAACA	BC022687	cDNA sequence BC022687	chr12:114054174-114054233	NM_145450	217887	CLBA1	9.219	9.62291	9.37483	7.91131	7.83393	8.09469
A_51_P382789	-1.45571	9.71387	-6.99345	0.000508662	0.0142954	0.206496	ENSMUSG00000074344	Gencode.M18_pc	Tmigd3	transmembrane and immunoglobulin domain containing 3 [Source:MGI Symbol;Acc:MGI:5604098]	protein_coding	CAGAGGGCTCCCGAATGTCCATTCTGATCATTTGTATACTGATTACCAGTTTGGGGATCA	Tmigd3	transmembrane and immunoglobulin domain containing 3	chr3:105721698-105722939	NM_027025	69296	TMIGD3	10.1782	10.5992	10.5478	9.1836	8.5897	9.18476
A_52_P49042	-1.45315	7.47586	-5.3997	0.00189624	0.0283387	-1.25462	ENSMUSG00000019852	Gencode.M18_pc	Arfgef3	ARFGEF family member 3 [Source:MGI Symbol;Acc:MGI:106387]	protein_coding	GGCTGTGATAGAATCATTGTAAGTCTTCAACTACAATATACAGTTGTGAAATGATGGTGT	Arfgef3	ARFGEF family member 3	chr10:18308380-18308321	NM_001033258	215821	ARFGEF3	7.8966	8.18369	8.52702	6.77854	7.17733	6.29199
A_55_P2101216	-1.45141	12.1653	-8.82289	0.000147524	0.00761691	1.56456	ENSMUSG00000019102	Gencode.M18_pc	Aldh3a1	aldehyde dehydrogenase family 3, subfamily A1 [Source:MGI Symbol;Acc:MGI:1353451]	protein_coding	CCTCCCCCCTCTTGTTCTGCTGTTTGCTGAGCACAGAGACCAATAAAAAAGCCTCTAAAG	Aldh3a1	aldehyde dehydrogenase family 3, subfamily A1	chr11:61031857-61031916	NM_001331112	11670	ALDH3A1	12.915	13.0329	12.7251	11.1793	11.729	11.4106
A_51_P384148	-1.45133	8.91912	-4.53098	0.00439712	0.046015	-2.18985	ENSMUSG00000032547	Agilent eArray	Ryk	receptor-like tyrosine kinase	protein_coding	CGCAGAGTGTTTTCTAGATACCACTTTACTAGGTTGAACCAAAAGGGGTTTTGTACATTT	Ryk	receptor-like tyrosine kinase	chr9:102809441-102809501	NM_013649	20187	RYK	9.15125	10.2625	9.52059	8.15859	7.88629	8.53546
A_55_P1968982	-1.45066	11.0228	-5.18551	0.00231208	0.0320025	-1.47527	ENSMUSG00000038718	Gencode.M18_pc	Pbx3	pre B cell leukemia homeobox 3 [Source:MGI Symbol;Acc:MGI:97496]	protein_coding	GCGCTCACTTACTACCTCTGAACAATACTCACGCTGTAGTTTGTCTCTTTCTTATCTTTT	Pbx3	pre B cell leukemia homeobox 3	chr2:34027540-34027481	NM_016768	18516	PBX3	11.3848	12.3558	11.5039	10.4134	10.0638	10.4154
A_55_P2069714	-1.44906	14.6078	-7.28046	0.000411875	0.0128294	0.439629	ENSMUSG00000015837	Gencode.M18_pc	Sqstm1	sequestosome 1 [Source:MGI Symbol;Acc:MGI:107931]	protein_coding	TGTCTTCAAAAGAAGTGGACCCATCTACAGGTGAACTCCAGTCTCTACAGATGCCAGAAT	Sqstm1	sequestosome 1	chr11:50016044-50015985	NM_011018	18412	SQSTM1	15.3955	14.9197	15.6817	13.9199	13.9381	13.7918
A_55_P2308488	-1.44898	11.585	-11.725	3.09545e-05	0.003557	3.22966	ENSMUSG00000002489	Gencode.M18_pc	Tiam1	T cell lymphoma invasion and metastasis 1 [Source:MGI Symbol;Acc:MGI:103306]	protein_coding	CTCCTCCCCATTTCACAATGTCCATTCCTTAAGAAGGGTTTAAATAATATGAAAACTTTG	Tiam1	T cell lymphoma invasion and metastasis 1	chr16:89788065-89788006	NM_009384	21844	TIAM1	12.3948	12.4254	12.1082	11.0095	10.7403	10.8316
A_55_P2024075	-1.44839	14.2164	-5.95245	0.00116568	0.0219366	-0.713334	ENSMUSG00000005034	Gencode.M18_pc	Prkacb	protein kinase, cAMP dependent, catalytic, beta [Source:MGI Symbol;Acc:MGI:97594]	protein_coding	AAAGAAGCCGTGGCTTATGGGTATTGCTGTCTTGTTCTTGGTGTGTACCTGTACTGATTG	Prkacb	protein kinase, cAMP dependent, catalytic, beta	chr3:146392898-146392839	NM_011100	18749	PRKACB	14.9878	15.4027	14.4314	13.4609	13.4781	13.5378
A_55_P1993744	-1.44674	7.65329	-9.69355	8.84013e-05	0.00584384	2.11801	ENSMUSG00000022272	Gencode.M18_pc	Myo10	myosin X [Source:MGI Symbol;Acc:MGI:107716]	protein_coding	GCTGGCCAACACGTACAAGATCGTAGTTGACGAGCGGGAGCTGCTCTTTGAGACGAGTGA	Myo10	myosin X	chr15:25740245-25740304	NM_019472	17909	MYO10	8.34104	8.6109	8.17803	7.13056	6.86994	6.78925
A_51_P406557	-1.44577	6.51986	-7.65136	0.000316712	0.0111506	0.729057	ENSMUSG00000046312	Gencode.M18_pc	AI464131	expressed sequence AI464131 [Source:MGI Symbol;Acc:MGI:2140300]	protein_coding	TGAAGCCTTAGTGGGAAAACCATGTTCTAATTCTGGCCGAGATGTGCTTGGCACATGAAT	AI464131	expressed sequence AI464131	chr4:41443223-41443164	NM_001085515	329828	AI464131	6.87643	7.60514	7.24667	5.72234	5.80819	5.86039
A_66_P134488	-1.44409	8.87267	-8.14457	0.000226972	0.00936822	1.09465	ENSMUSG00000034394	Gencode.M18_pc	Lif	leukemia inhibitory factor [Source:MGI Symbol;Acc:MGI:96787]	protein_coding	AGAGAGAAGCAAAGGGGCCTTTATTTATTATTTAAAACTTCAAACCTGAAAGCACTGAGA	Lif	leukemia inhibitory factor	chr11:4172032-4172091	NM_008501	16878	LIF	9.79242	9.43133	9.5604	8.28605	7.81466	8.35117
A_66_P126563	-1.44386	9.79981	-9.06684	0.000127246	0.00702688	1.72498	ENSMUSG00000097487	Gencode.M18_pc	Ptges3l	prostaglandin E synthase 3 like [Source:MGI Symbol;Acc:MGI:1916146]	protein_coding	CCTTCTTCAACTACTTGGTTTGCATCAAGATCCACAGAGACCTTTGAACTCTTCCAGAAG	Ptges3l	prostaglandin E synthase 3 like	chr11:101280408-101280349	NM_026865	73635	PTGES3L	10.3021	10.7547	10.5084	8.85209	9.13292	9.24862
A_55_P2084691	-1.44361	6.49388	-7.51414	0.000348598	0.0118353	0.623488	ENSMUSG00000069270	Gencode.M18_pc	Hist1h2ac	histone cluster 1, H2ac [Source:MGI Symbol;Acc:MGI:2448287]	protein_coding	TAAAACTTGACAGTATGTGAACAGCTGAAGTCTCAGCCGAGGCCAGCATGGCTTTTATTC	Hist1h2ac	histone cluster 1, H2ac	chr13:23773402-23773343	AK033518	319164	HIST1H2AC	7.12187	6.95723	7.56793	5.75677	5.57281	5.98664
A_51_P391454	-1.44343	6.69876	-14.6233	8.99539e-06	0.00196305	4.4858	ENSMUSG00000040329	Gencode.M18_pc	Il7	interleukin 7 [Source:MGI Symbol;Acc:MGI:96561]	protein_coding	AAGATAGAAATGCACTTATTCCAAAGATACTGAACCTTAGTATTCAGTCGCTTTTGACAC	Il7	interleukin 7	chr3:7573266-7573207	NM_008371	16196	IL7	7.52363	7.34267	7.39511	6.05729	5.82741	6.04644
A_51_P302488	-1.44283	5.95549	-5.18161	0.00232057	0.0320914	-1.47935	ENSMUSG00000029005	Gencode.M18_pc	Draxin	dorsal inhibitory axon guidance protein [Source:MGI Symbol;Acc:MGI:1917683]	protein_coding	CCTTGCATGTGACAGGTGCTAATCATCATCATGAATAGGAGAAACAGTAACGTTGCTCTG	Draxin	dorsal inhibitory axon guidance protein	chr4:147475602-147475543	NM_027426	70433	DRAXIN	6.90225	7.08489	6.04357	5.15485	5.20716	5.3402
A_55_P2008438	-1.44228	13.4668	-4.71726	0.00364047	0.041136	-1.98013	ENSMUSG00000044303	Gencode.M18_pc	Cdkn2a	cyclin dependent kinase inhibitor 2A [Source:MGI Symbol;Acc:MGI:104738]	protein_coding	CTTCTAGCGATGCTAGCGTGTCTAGCATGTGGCTTTAAAAAATACATAATAATGCTTTTT	Cdkn2a	cyclin-dependent kinase inhibitor 2A	chr4:88920602-88920543	NM_009877	12578	CDKN2A	13.6249	14.3788	14.5601	12.4751	12.5871	13.1747
A_55_P2154933	-1.44197	15.0361	-10.4413	5.8795e-05	0.00495843	2.55404	ENSMUSG00000062082	Gencode.M18_pc	Cd200r4	CD200 receptor 4 [Source:MGI Symbol;Acc:MGI:3036289]	protein_coding	ATGGCCCTTTTGGTGATTATTCTTCTTAACGTAGGATTTGCTTTCTTCCAGAAGAGAAAT	Cd200r4	CD200 receptor 4	chr16:44838106-44838165	NM_207244	239849	CD200R4	15.7338	15.731	15.8064	14.5901	14.0924	14.2628
A_55_P1967978	-1.4396	12.4799	-5.00743	0.00273846	0.0351287	-1.66357	ENSMUSG00000027544	Gencode.M18_pc	Nfatc2	nuclear factor of activated T cells, cytoplasmic, calcineurin dependent 2 [Source:MGI Symbol;Acc:MGI:102463]	protein_coding	CACATTCCTATGCAAAACGATTTTAATCTCCGGTTTCCTGCAGTTTATTTTTGCTATATG	Nfatc2	nuclear factor of activated T cells, cytoplasmic, calcineurin dependent 2	chr2:168302033-168301974	NM_001136073	18019	NFATC2	13.2555	13.7331	12.6107	11.7311	11.6247	11.9247
A_52_P80787	-1.43947	5.60445	-8.47823	0.000182939	0.00847534	1.33032	ENSMUSG00000104876	Gencode.M18_pc	Trdc	T cell receptor delta, constant region [Source:MGI Symbol;Acc:MGI:98612]	TR_C_gene	TGTGCACTCGACTGACTTTGAACCATATGCAAATTCTTTCAATAATGAAAAACTACCAGA	NA	NA	chr14:54762764-54763464	AK153587	NA	TRDC	6.24822	6.67447	6.04985	4.95769	4.80288	4.89357
A_51_P458866	-1.43686	13.7025	-6.10483	0.00102547	0.0204002	-0.570895	ENSMUSG00000038235	Agilent eArray	F11r	F11 receptor	protein_coding	ATTAGTCACTCTTCATTTGGCTGGAACTACCGCACGGACCCTTTGAAGATATGTGTGGAT	F11r	F11 receptor	chr1:173393848-173393907	NM_172647	16456	F11R	14.2682	14.8823	14.1122	12.8133	12.8822	13.2567
A_51_P311958	-1.4351	5.7758	-7.88567	0.000269751	0.0102111	0.905386	ENSMUSG00000028359	Gencode.M18_pc	Orm3	orosomucoid 3 [Source:MGI Symbol;Acc:MGI:97445]	protein_coding	TTGTCGACTGGAAAAAGGACAGGTGCAGTGAACAGGAAAAGAAGCATCTTGAGTTGGAGA	Orm3	orosomucoid 3	chr4:63018910-63020393	NM_013623	18407	ORM3	6.31814	6.89179	6.27011	5.0163	5.00507	5.15337
A_55_P2106666	-1.42971	11.1021	-6.04181	0.00108096	0.0210687	-0.62946	ENSMUSG00000005580	Gencode.M18_pc	Adcy9	adenylate cyclase 9 [Source:MGI Symbol;Acc:MGI:108450]	protein_coding	TTCATTTCCACCCATTTCGGTTTTCCTTTACTTGCGTTCCTGGAAGCCTTTTCCTGGAAG	Adcy9	adenylate cyclase 9	chr16:4287737-4287678	NM_009624	11515	ADCY9	11.7915	12.1127	11.5466	9.98398	10.4381	10.7395
A_51_P286106	-1.42941	9.76679	-5.9363	0.00118179	0.0220148	-0.728596	ENSMUSG00000038152	Gencode M18	5033430I15Rik	RIKEN cDNA 5033430I15 gene [Source:MGI Symbol;Acc:MGI:1923250]	lincRNA	AGCAGCGTACAGAATCACCAAGAGAAACGTGTGCGCGTTTAAACTACTGTATTGTGGAGC	5033430I15Rik	RIKEN cDNA 5033430I15 gene	chr13:46061765-46061824	XR_141159	76000	5033430I15RIK	10.7293	10.782	9.93314	9.13312	8.95955	9.06358
A_55_P1966159	-1.42905	5.76906	-8.89293	0.000141341	0.00747475	1.61106	ENSMUSG00000021782	Gencode.M18_pc	Dlg5	discs large MAGUK scaffold protein 5 [Source:MGI Symbol;Acc:MGI:1918478]	protein_coding	GACATGCTGGACTAAAATGTTACTTTGTATCGCAAACAAAACAGACTTCAGTTCAACAAA	Dlg5	discs, large homolog 5 (Drosophila)	chr14:24953253-24953194	NM_001163513	71228	DLG5	6.25839	6.43793	6.75442	4.89007	5.24438	5.02915
A_55_P2227967	-1.42879	11.6488	-7.25905	0.000418312	0.0129298	0.422516	ENSMUSG00000040433	Gencode.M18_pc	Zbtb38	zinc finger and BTB domain containing 38 [Source:MGI Symbol;Acc:MGI:2442866]	protein_coding	GGCCCTTATATGTGGATATTTTTTAAGTGGACTTGTATGCTGATAATTCTAGACCAAAGT	Zbtb38	zinc finger and BTB domain containing 38	chr9:96583698-96583639	AK142305	245007	ZBTB38	12.303	12.7573	12.0293	10.8502	11.0775	10.8755
A_52_P58257	-1.42821	12.8617	-11.3237	3.75551e-05	0.0039094	3.02755	ENSMUSG00000039680	Gencode.M18_pc	Mrps6	mitochondrial ribosomal protein S6 [Source:MGI Symbol;Acc:MGI:2153111]	protein_coding	CTGCTAGGTTGTTGTCTAGGATACTTTAGCCCATGACCATTTTGCTGCAGGAGGTAGAAA	Mrps6	mitochondrial ribosomal protein S6	chr16:92112223-92112282	NM_080456	121022	MRPS6	13.5817	13.6682	13.4774	12.187	12.3323	11.9233
A_55_P2122628	-1.42774	5.68893	-7.25589	0.000419272	0.0129485	0.419986	ENSMUSG00000079146	Gencode M18	Gm15353	predicted gene 15353 [Source:MGI Symbol;Acc:MGI:3705219]	antisense	AGGATTGCTTCTTCGGACAAGAACAAAACCACTAGCTGCAGTCTTTAGCATTTATTCTGA	LOC105243125	uncharacterized LOC105243125	chr8:12879937-12879878	XR_870154	105243125	GM15353	6.53858	6.64117	6.02867	5.06174	4.73836	5.12509
A_55_P2096043	-1.42655	11.5132	-12.1344	2.55734e-05	0.00325414	3.42799	ENSMUSG00000034853	Gencode.M18_pc	Acot11	acyl-CoA thioesterase 11 [Source:MGI Symbol;Acc:MGI:1913736]	protein_coding	GTTGCTACCTCATTCTCTTAAGAGTTCAGCTGTATTCTGCAAATAAAATGCTTGAAACCG	Acot11	acyl-CoA thioesterase 11	chr4:106417244-106417185	NM_025590	329910	ACOT11	12.2628	12.2879	12.1289	10.9224	10.8955	10.5821
A_51_P271439	-1.42472	5.96235	-6.83468	0.000573411	0.0152851	0.0739355	ENSMUSG00000042680	Gencode.M18_pc	Garem1	GRB2 associated regulator of MAPK1 subtype 1 [Source:MGI Symbol;Acc:MGI:2685790]	protein_coding	TTTGTCACTGAAAAGATCGATGGGAATTTGCTTGTTCAATTAACAGAAGAGATCCTCTCA	Garem1	GRB2 associated regulator of MAPK1 subtype 1	chr18:21287760-21287701	NM_001033445	381126	GAREM1	6.53538	7.06559	6.42316	5.00464	5.28208	5.46325
A_51_P467110	-1.4233	7.28044	-4.72605	0.0036086	0.0409283	-1.97035	ENSMUSG00000035000	Gencode.M18_pc	Dpp4	dipeptidylpeptidase 4 [Source:MGI Symbol;Acc:MGI:94919]	protein_coding	CAAAGCACTGACTTCTAAGTAAAACCACAGCAGTTGAATAGACTCCAAAGAAATGCAAGG	Dpp4	dipeptidylpeptidase 4	chr2:62170121-62170062	NM_010074	13482	DPP4	8.06124	7.79293	8.12209	6.76635	5.90857	7.03144
A_55_P1965363	-1.41801	8.55287	-9.6242	9.19398e-05	0.00592636	2.07582	ENSMUSG00000069248	Gencode.M18_pc	Serpinb6e	serine (or cysteine) peptidase inhibitor, clade B, member 6e [Source:MGI Symbol;Acc:MGI:2667778]	protein_coding	GGCCCAAGTGACCTTATCCATAAATATAATGACAGTTATGAAATAAAGGGTTTATGGTAC	Serpinb6e	serine (or cysteine) peptidase inhibitor, clade B, member 6e	chr13:33924277-33924218	NM_001045535	435350	SERPINB6E	9.27494	9.21202	9.29867	7.56097	7.86225	8.10837
A_51_P422893	-1.41793	10.6208	-9.67618	8.92723e-05	0.00584716	2.10748	ENSMUSG00000025933	Gencode.M18_pc	Tmem14a	transmembrane protein 14A [Source:MGI Symbol;Acc:MGI:1922962]	protein_coding	TCTATTCTCAGCACATCAGCATCCTGACACAATGCACTCAGTGTTGAAATAAAATGCATC	Tmem14a	transmembrane protein 14A	chr1:21220180-21220239	NM_029398	75712	TMEM14A	11.1115	11.6275	11.2502	9.8315	9.95507	9.94888
A_51_P348433	-1.41606	6.54935	-6.19629	0.000950667	0.0196737	-0.486743	ENSMUSG00000029602	Agilent eArray	Rasal1	RAS protein activator like 1 (GAP1 like)	protein_coding	TAGGAGCCTTTGGTTAGGGCCCAGTCTTGTACTGACCAAACCTCACTTTCTTCTCTGAGC	Rasal1	RAS protein activator like 1 (GAP1 like)	chr5:121129217-121129275	NM_013832	19415	RASAL1	7.23209	7.70058	6.83949	5.97054	5.67365	5.87978
A_55_P2143251	-1.41508	7.17507	-7.81554	0.000282903	0.0105328	0.853126	ENSMUSG00000032890	Gencode.M18_pc	Rims3	regulating synaptic membrane exocytosis 3 [Source:MGI Symbol;Acc:MGI:2443331]	protein_coding	CTTCACATGGCTTCTGCATGTACAGTATTTGGGCAAAAAACAAAAAATAAAGTCCATTTG	Rims3	regulating synaptic membrane exocytosis 3	chr4:120569114-120569173	XM_006503101	242662	RIMS3	8.23109	7.89168	7.52507	6.47042	6.48398	6.4482
A_55_P2102838	-1.4148	6.10524	-5.14873	0.00239353	0.0325992	-1.51379	ENSMUSG00000102862	Gencode M18	Gm37640	predicted gene, 37640 [Source:MGI Symbol;Acc:MGI:5610868]	antisense	ATCTGCTCACACATGAATGCACACCTGTACAGATGCACACACTCAATAAAAATGTAATAC	NA	NA	chr3:32512374-32512433	BE853708	NA	GM37640	6.87015	7.33275	6.23503	5.44419	5.30984	5.43948
A_51_P479321	-1.41458	12.2615	-8.60092	0.000169304	0.00818321	1.41475	ENSMUSG00000027452	Gencode.M18_pc	Acss1	acyl-CoA synthetase short-chain family member 1 [Source:MGI Symbol;Acc:MGI:1915988]	protein_coding	TGGCCTAGGTTTCTAGGTTACTGATAGAAGCTCTCGGAATGATTTATAGAAATATCCAAA	Acss1	acyl-CoA synthetase short-chain family member 1	chr2:150443930-150443871	NM_080575	68738	ACSS1	12.962	12.8778	13.0663	11.6083	11.2286	11.8257
A_55_P2029846	-1.41446	11.2252	-6.49195	0.000748538	0.0173417	-0.221399	ENSMUSG00000034858	Gencode.M18_pc	Fam214a	family with sequence similarity 214, member A [Source:MGI Symbol;Acc:MGI:2387648]	protein_coding	GTTTTCCTTTATAGTCAAGTGATGTTTGTCTCTAGTGTTCTAATGTAGCACAATCCTATG	Fam214a	family with sequence similarity 214, member A	chr9:74879770-74879829	NM_001113283	235493	FAM214A	11.7028	12.2612	11.8333	10.1698	10.8025	10.5816
A_55_P2050426	-1.40986	10.1155	-7.66266	0.00031424	0.0111369	0.737675	ENSMUSG00000044864	Gencode.M18_pc	Ankrd50	ankyrin repeat domain 50 [Source:MGI Symbol;Acc:MGI:2139777]	protein_coding	GTATGCGAAAACATCCCGATGTACATGAAGTGCAGAATAAATCTATTTGCTTTACAGAAG	Ankrd50	ankyrin repeat domain 50	chr3:38348632-38348573	NM_001167883	99696	ANKRD50	10.8297	10.9855	10.6463	9.0703	9.69883	9.4627
A_51_P247249	-1.40914	15.757	-7.03209	0.000494207	0.0140853	0.238369	ENSMUSG00000025701	Gencode.M18_pc	Alox5	arachidonate 5-lipoxygenase [Source:MGI Symbol;Acc:MGI:87999]	protein_coding	TTTATGCTTCCTCCAATTGCTTGCATAGAGTAGGTGCTTAGAGAAAGTTCTTGGATTAAG	Alox5	arachidonate 5-lipoxygenase	chr6:116360385-116360326	NM_009662	11689	ALOX5	16.5306	16.756	16.0981	15.2561	14.8324	15.0687
A_55_P2101336	-1.40903	5.93498	-9.71843	8.71707e-05	0.00581555	2.13308	ENSMUSG00000001240	Gencode.M18_pc	Ramp2	receptor (calcitonin) activity modifying protein 2 [Source:MGI Symbol;Acc:MGI:1859650]	protein_coding	GCAGCAAAGGGGACTCACGACACAATGTTTGTAGTCTTTAAAATAAAGTTATGTTTTTGT	Ramp2	receptor (calcitonin) activity modifying protein 2	chr11:101109501-101109560	NM_019444	54409	RAMP2	6.78866	6.39772	6.73212	5.42413	5.09584	5.17144
A_51_P423976	-1.40889	9.44611	-7.11847	0.000463583	0.0135982	0.309059	ENSMUSG00000063889	Gencode.M18_pc	Crem	cAMP responsive element modulator [Source:MGI Symbol;Acc:MGI:88495]	protein_coding	TAGATTTTTATAATCGTCACTTTGTAAAGAAAGTATTGTATTGCTGTCCTTGGGTGCCAC	Crem	cAMP responsive element modulator	chr18:3267108-3267049	NM_013498	12916	CREM	9.84523	10.0659	10.5405	8.70702	8.59935	8.91861
A_52_P547662	-1.40487	12.7494	-6.40704	0.000801018	0.0181005	-0.296577	ENSMUSG00000027765	Gencode.M18_pc	P2ry1	purinergic receptor P2Y, G-protein coupled 1 [Source:MGI Symbol;Acc:MGI:105049]	protein_coding	TTGTCTCATCAGTGGTAGCTTAACAACCTCTGGATTGATTGTGTATAATTGTCTTTGTAT	P2ry1	purinergic receptor P2Y, G-protein coupled 1	chr3:60812600-60812659	NM_008772	18441	P2RY1	13.3016	13.7335	13.3203	12.3897	11.6674	12.0838
A_52_P131458	-1.4046	11.004	-7.45974	0.000362261	0.0120618	0.581144	ENSMUSG00000038172	Gencode.M18_pc	Ttc39b	tetratricopeptide repeat domain 39B [Source:MGI Symbol;Acc:MGI:1917113]	protein_coding	ACAAACCTGCCAAAAATACAGGAAGAAATGCACAGTTGTCGAGTCTTTCTCAAGTCTCCT	Ttc39b	tetratricopeptide repeat domain 39B	chr4:82907744-82906818	NM_027238	69863	TTC39B	11.4622	12.1292	11.5274	10.2646	10.3032	10.3372
A_55_P1952182	-1.40457	6.5182	-4.75255	0.00351442	0.0404169	-1.94097	ENSMUSG00000095093	Gencode.M18_pc	Vmn2r111	vomeronasal 2, receptor 111 [Source:MGI Symbol;Acc:MGI:3647034]	protein_coding	AGTGCAGGGATGCTGGGGTGCATCTTTGTTTCTAAATGTTATACAATATTGTTTAGACCA	Vmn2r111	vomeronasal 2, receptor 111	chr17:22685027-22684968	NM_001104573	210876	VMN2R111	6.95625	7.90015	6.80507	5.79774	5.7342	5.91582
A_51_P152040	-1.40449	10.8571	-9.39223	0.000105035	0.00631013	1.93237	ENSMUSG00000000552	Gencode.M18_pc	Zfp385a	zinc finger protein 385A [Source:MGI Symbol;Acc:MGI:1352495]	protein_coding	AGAACATGGATTTTCTTGGCAATAAGCGGACTCTGGGACTCCGGCTCCCCTACCCCAAAC	Zfp385a	zinc finger protein 385A	chr15:103145063-103145004	NM_013866	29813	ZFP385A	11.4056	11.7176	11.5548	10.3981	9.92714	10.1393
A_51_P117794	-1.40371	6.89258	-7.58474	0.000331751	0.0114348	0.678018	ENSMUSG00000016758	Gencode.M18_pc	Bik	BCL2-interacting killer [Source:MGI Symbol;Acc:MGI:1206591]	protein_coding	TTTTCAGGAGCTTGATTCGAAGCCTCACCAACCTCAGGGAAAACATCTGGTCCTGGAGAG	Bik	BCL2-interacting killer	chr15:83374048-83374107	NM_007546	12124	BIK	7.66013	7.85342	7.26975	6.28015	5.9538	6.33821
A_65_P19319	-1.40257	9.01879	-6.89478	0.00054784	0.0149219	0.124422	ENSMUSG00000055485	Agilent eArray	Soga1	suppressor of glucose, autophagy associated 1	protein_coding	TATCCTTGCCCTGTGTCTTATTTTAGACATGAGAACTGTACAGTGTAAACTTACAAAATG	Soga1	suppressor of glucose, autophagy associated 1	chr2:156836280-156836221	NM_001164663	320706	SOGA1	10.1311	9.44414	9.58502	8.23232	8.51838	8.2018
A_55_P2031611	-1.40169	7.03346	-5.66015	0.00150116	0.0249028	-0.994651	ENSMUSG00000097165	Gencode M18	2210008F06Rik	RIKEN cDNA 2210008F06 gene [Source:MGI Symbol;Acc:MGI:1917307]	lincRNA	ACTAGGAGAGGCCGCGAGAATGCCTGTACAATTCCTCATTAAATCGTTTTCAAAACCTTG	2210008F06Rik	RIKEN cDNA 2210008F06 gene	chr11:77304855-77304914	XR_388863	70057	2210008F06RIK	7.35486	7.7901	8.05795	6.3902	6.65006	5.95757
A_55_P1979457	-1.39613	12.8535	-5.80494	0.00132281	0.0233729	-0.853954	ENSMUSG00000025289	Gencode.M18_pc	Prdx4	peroxiredoxin 4 [Source:MGI Symbol;Acc:MGI:1859815]	protein_coding	GCTAAACTGAAAAGTACTTCAGTTATGATGTTTGGACCTTCTCAATAAAGGTCATTGTGT	Prdx4	peroxiredoxin 4	chrX:151758530-151758471	NM_016764	53381	PRDX4	13.5938	13.7339	13.3271	11.6787	12.2522	12.5355
A_52_P932421	-1.39561	6.47114	-4.99881	0.00276127	0.0352132	-1.67279	ENSMUSG00000078444	Gencode M18	Gm10941	predicted gene 10941 [Source:MGI Symbol;Acc:MGI:3779151]	bidirectional_promoter_lncRNA	TTCCTGAAAATACTTAGGACTTGTGTCCAATCGTGGAGAGATCTTTAAAGTCCGGGAGTA	Gm10941	predicted gene 10941	chr10:76721486-76720687	NR_026944	100169878	GM10941	6.86728	7.77402	6.86553	5.53603	5.94898	5.83497
A_55_P1973553	-1.39547	10.0464	-5.09454	0.00251959	0.0334853	-1.5709	ENSMUSG00000051444	Gencode.M18_pc	Bbs12	Bardet-Biedl syndrome 12 (human) [Source:MGI Symbol;Acc:MGI:2686651]	protein_coding	CCCAGCTGTATAAGAACAGCAAGCACTTTTGAGTCATTTCTCCAGACTTAATAAATTTTA	Bbs12	Bardet-Biedl syndrome 12 (human)	chr3:37220248-37220307	NM_001255992	241950	BBS12	10.6784	11.3058	10.2481	9.35047	9.50441	9.19104
A_55_P2169659	-1.39428	8.32122	-5.71219	0.00143405	0.0243124	-0.943773	ENSMUSG00000001930	Gencode.M18_pc	Vwf	Von Willebrand factor [Source:MGI Symbol;Acc:MGI:98941]	protein_coding	TAGTTAAACAGAACAACAGTGAAGGGCGGAGGGTGGAGATTTATTCAACACTGGGAAGAG	Vwf	Von Willebrand factor	chr6:125542106-125542165	AK083237	22371	VWF	8.89519	9.53525	8.62464	7.46033	7.66176	7.75014
A_51_P117130	-1.39367	11.4081	-4.40802	0.00499428	0.0494064	-2.33114	ENSMUSG00000022453	Gencode.M18_pc	Naga	N-acetyl galactosaminidase, alpha [Source:MGI Symbol;Acc:MGI:1261422]	protein_coding	ACTGAAGTCAACTTCACTGTGATCATCAATCCTTCGGGGGTTGTGATGTGGTACCTCTAT	Naga	N-acetyl galactosaminidase, alpha	chr15:82160595-82160536	NM_008669	17939	NAGA	12.8098	11.7003	11.8049	10.5717	10.6222	10.94
A_55_P2105843	-1.393	11.799	-5.85927	0.00126226	0.0227609	-0.801846	ENSMUSG00000024561	Gencode M18	Mbd1	methyl-CpG binding domain protein 1 [Source:MGI Symbol;Acc:MGI:1333811]	protein_coding	CCCCAGAGCTCTGGTCCATGTGCTTTCTTGCTGTTACTTTATTAAATCTTGCCTTCTACA	Mbd1	methyl-CpG binding domain protein 1	chr18:74427300-74427359	XM_006525709	17190	MBD1	12.6062	12.0903	12.7901	11.1049	10.7916	11.4111
A_66_P101724	-1.39202	6.44508	-7.03706	0.000492383	0.014056	0.242456	ENSMUSG00000035184	Gencode.M18_pc	Fam124a	family with sequence similarity 124, member A [Source:MGI Symbol;Acc:MGI:3645930]	protein_coding	CCATGTCATGACCCCAAAGCCACACAGGGTGTCCAAGGCATGCTATTGCCTCCAACAACA	Fam124a	family with sequence similarity 124, member A	chr14:63225391-63225450	NM_001243857	629059	FAM124A	7.30778	6.72918	7.3863	5.6174	5.71182	5.91798
A_52_P603421	-1.38948	8.03543	-4.77584	0.00343398	0.0399546	-1.91523	ENSMUSG00000057176	Gencode.M18_pc	Ccdc189	coiled-coil domain containing 189 [Source:MGI Symbol;Acc:MGI:2685012]	protein_coding	GCAACGTGGAGGAATGCTACCGCTACTTTACCAGCGTTCTCTTTTGTCATGGAATCAGGC	Ccdc189	coiled-coil domain containing 189	chr7:134729026-134728775	NM_001033040	233899	CCDC189	8.76032	9.20526	8.22494	7.18965	7.11461	7.71782
A_55_P2016252	-1.38939	7.83567	-4.48322	0.00461888	0.0473628	-2.24446	ENSMUSG00000038816	Gencode.M18_pc	Ctnnal1	catenin (cadherin associated protein), alpha-like 1 [Source:MGI Symbol;Acc:MGI:1859649]	protein_coding	ATTCAGCCAGTTTGGAAACGAAATGGTGGAGTTTGCACATCTAACGGGAGACCGACAAAA	Ctnnal1	catenin (cadherin associated protein), alpha-like 1	chr4:56854493-56854434	NM_018761	54366	CTNNAL1	8.52782	9.1321	7.93117	7.36369	7.00779	7.05144
A_55_P2000158	-1.38615	7.33286	-5.94361	0.00117447	0.021974	-0.721683	ENSMUSG00000028698	Gencode.M18_pc	Pik3r3	phosphoinositide-3-kinase regulatory subunit 3 [Source:MGI Symbol;Acc:MGI:109277]	protein_coding	TTCTCCAAGACTTGGAATGGTTGGCAGACTTGCTCCAGATGCAATAAAGACATTGCAGTG	Pik3r3	phosphoinositide-3-kinase regulatory subunit 3	chr4:115975600-115975659	NM_181585	18710	PIK3R3	7.58592	8.10796	8.38394	6.67226	6.39271	6.85439
A_52_P489295	-1.38604	7.71044	-6.17567	0.000966969	0.0198467	-0.50563	ENSMUSG00000022893	Gencode.M18_pc	Adamts1	a disintegrin-like and metallopeptidase (reprolysin type) with thrombospondin type 1 motif, 1 [Source:MGI Symbol;Acc:MGI:109249]	protein_coding	GAAAGAGCTCCTGATTTCTTCTTACACCATCTCAGTTCTTAACTATAGTTCATGTTGAGG	Adamts1	a disintegrin-like and metallopeptidase (reprolysin type) with thrombospondin type 1 motif, 1	chr16:85795103-85795044	NM_009621	11504	ADAMTS1	8.52402	8.1366	8.54975	6.73128	6.86726	7.45373
A_55_P2034663	-1.38483	15.6733	-10.6428	5.29174e-05	0.004687	2.66587	ENSMUSG00000071714	Gencode.M18_pc	Csf2rb2	colony stimulating factor 2 receptor, beta 2, low-affinity (granulocyte-macrophage) [Source:MGI Symbol;Acc:MGI:1339760]	protein_coding	TAAAATTGGGCAGGCTCTTGTTGCTCCAAGAATAGACATGGTCCTCTATGGTTGTCTGAA	Csf2rb2	colony stimulating factor 2 receptor, beta 2, low-affinity (granulocyte-macrophage)	chr15:78114156-78114097	NM_007781	12984	CSF2RB2	16.167	16.6228	16.3073	14.9407	15.0295	14.9724
A_55_P2002795	-1.38424	6.28723	-5.76403	0.00137061	0.0237795	-0.893434	ENSMUSG00000054568	Gencode.M18_pc	Usp17la	ubiquitin specific peptidase 17-like A [Source:MGI Symbol;Acc:MGI:107699]	protein_coding	CCTGTAGAGATAGATGCTCTTATTCTTAGTGTGTGATCAACAGTTCTTTGGTCAAATAAA	Usp17la	ubiquitin specific peptidase 17-like A	chr7:112011106-112011165	NM_007887	13531	USP17LA	7.44922	6.89586	6.59295	5.51623	5.43628	5.83282
A_52_P679101	-1.38376	11.5732	-5.17608	0.00233266	0.0321794	-1.48513	ENSMUSG00000024812	Gencode.M18_pc	Tjp2	tight junction protein 2 [Source:MGI Symbol;Acc:MGI:1341872]	protein_coding	GGGACTGGAGTGAAGTTGATTCTGACTTTCTTGAATGAAGAGAAACAGTCTGATAACTGT	Tjp2	tight junction protein 2	chr19:24169790-24169731	NM_011597	21873	TJP2	12.8079	12.1905	11.7968	11.001	10.9686	10.6744
A_51_P415126	-1.38317	7.21239	-5.54691	0.00166004	0.0262	-1.10659	ENSMUSG00000029999	Gencode.M18_pc	Tgfa	transforming growth factor alpha [Source:MGI Symbol;Acc:MGI:98724]	protein_coding	TGGACATACACAGAACCAAACCATGAGTTAGTTTGTCATGTGCCCCAGAAAAAGGTGGGA	Tgfa	transforming growth factor alpha	chr6:86224838-86224897	NM_031199	21802	TGFA	8.15537	7.51543	8.04114	6.13511	6.8683	6.559
A_55_P1975481	-1.38212	12.344	-6.37369	0.000822782	0.0183911	-0.326328	ENSMUSG00000040016	Gencode.M18_pc	Ptger3	prostaglandin E receptor 3 (subtype EP3) [Source:MGI Symbol;Acc:MGI:97795]	protein_coding	ACCAGATCTTGGATCCCTGGGTTTATCTGCTGCTAAGAAAGATCCTTCTTCGGAAGTTCT	Ptger3	prostaglandin E receptor 3 (subtype EP3)	chr3:157268044-157268103	NM_011196	19218	PTGER3	12.9867	13.3427	12.7758	11.9716	11.3255	11.6617
A_51_P148037	-1.38079	11.2975	-7.08079	0.000476662	0.0138092	0.278318	ENSMUSG00000040711	Gencode.M18_pc	Sh3pxd2b	SH3 and PX domains 2B [Source:MGI Symbol;Acc:MGI:2442062]	protein_coding	CTTATTACAGCAATAAACAATTCTAATGCAATGGAGGTGTCCGGATTATGCCTGCAATGC	Sh3pxd2b	SH3 and PX domains 2B	chr11:32327606-32327665	NM_177364	268396	SH3PXD2B	12.0215	11.6101	12.3321	10.4801	10.7369	10.6044
A_55_P1957918	-1.38058	10.6393	-4.82488	0.00327131	0.0388164	-1.86128	ENSMUSG00000052632	Gencode.M18_pc	Asap2	ArfGAP with SH3 domain, ankyrin repeat and PH domain 2 [Source:MGI Symbol;Acc:MGI:2685438]	protein_coding	CAGCGCAACTGTATATACTGTATAACCTAAACGGATTATTTTCATTGTCTTAATGCAGTG	Asap2	ArfGAP with SH3 domain, ankyrin repeat and PH domain 2	chr12:21275888-21275947	NM_001135192	211914	ASAP2	11.1664	11.8548	10.9677	9.69779	10.3449	9.80446
A_51_P434697	-1.37952	8.39203	-5.71207	0.00143421	0.0243124	-0.943893	ENSMUSG00000058317	Gencode.M18_pc	Ube2e2	ubiquitin-conjugating enzyme E2E 2 [Source:MGI Symbol;Acc:MGI:2384997]	protein_coding	TGCTTGTAAATTTCTTAGGGACCTGCCACTTTTGACTGTGGATCAGTTGATGTATACTTG	Ube2e2	ubiquitin-conjugating enzyme E2E 2	chr14:19406189-19406130	NM_144839	218793	UBE2E2	9.154	9.49817	8.5932	7.66495	7.88104	7.56083
A_55_P2083654	-1.37901	10.6288	-8.41869	0.000190012	0.00859702	1.28893	ENSMUSG00000020230	Gencode.M18_pc	Prmt2	protein arginine N-methyltransferase 2 [Source:MGI Symbol;Acc:MGI:1316652]	protein_coding	CCGCGTGTAATGTCTATGGGTAAATTATATGTGGGACTTAGTACATGCTCAATAAATATT	Prmt2	protein arginine N-methyltransferase 2	chr10:75670044-75669985	NM_001302965	15468	PRMT2	11.2267	11.499	11.2292	9.66172	9.94764	10.2085
A_55_P1956687	-1.37841	13.9291	-13.7141	1.29022e-05	0.0024045	4.1263	ENSMUSG00000020732	Gencode.M18_pc	Rab37	RAB37, member RAS oncogene family [Source:MGI Symbol;Acc:MGI:1929945]	protein_coding	ATACATAGCTCTGGGCCTCTGGCATTTCTGTTTTTCCAGAATTAAATTGCAGTATTTTGG	Rab37	RAB37, member RAS oncogene family	chr11:115023483-115023542	NM_001163753	58222	RAB37	14.7618	14.6383	14.455	13.1958	13.2201	13.3039
A_52_P317393	-1.3726	12.0468	-5.11201	0.00247815	0.0332019	-1.55245	ENSMUSG00000031785	Gencode.M18_pc	Adgrg1	adhesion G protein-coupled receptor G1 [Source:MGI Symbol;Acc:MGI:1340051]	protein_coding	TACCAGTTCATTTGTCTTTTGATATTAAAGCTCTTTATAGAGAGTCTGGAAACTGTAGGC	Adgrg1	adhesion G protein-coupled receptor G1	chr8:97537978-97538037	NM_018882	14766	ADGRG1	12.8733	13.1613	12.1646	11.4883	11.157	11.4361
A_51_P305437	-1.37126	13.1468	-6.81129	0.000583735	0.0154033	0.0541806	ENSMUSG00000005973	Gencode.M18_pc	Rcn1	reticulocalbin 1 [Source:MGI Symbol;Acc:MGI:104559]	protein_coding	TAGTGGATTTATTATTTGTTGAGTCCTGAATCTCTGAGCCTGCTTCTAGCACAGCTTATG	Rcn1	reticulocalbin 1	chr2:105227267-105227208	NM_009037	19672	RCN1	13.8813	14.0253	13.5908	12.8375	12.3301	12.216
A_51_P389636	-1.37089	13.4501	-15.3109	6.94397e-06	0.00170771	4.73965	ENSMUSG00000054342	Gencode.M18_pc	Kcnn4	potassium intermediate/small conductance calcium-activated channel, subfamily N, member 4 [Source:MGI Symbol;Acc:MGI:1277957]	protein_coding	GCCACATAGCTCCACATGAACTCACAGAAGAACCAGGCTAAGTACCCAAGGACCGAGCTC	Kcnn4	potassium intermediate/small conductance calcium-activated channel, subfamily N, member 4	chr7:25169184-25169782	NM_008433	16534	KCNN4	14.1193	14.1252	14.1622	12.8533	12.8281	12.6127
A_55_P2066180	-1.37002	6.66025	-5.8682	0.00125261	0.0227038	-0.793313	ENSMUSG00000034586	Gencode.M18_pc	Hid1	HID1 domain containing [Source:MGI Symbol;Acc:MGI:2445087]	protein_coding	GTGTCAGTACAATCTTTGCTCTGTACAATCGGCCACTTTACACAATAAAATGTCCCTCCC	Hid1	HID1 domain containing	chr11:115209083-115209024	NM_175454	217310	HID1	7.02269	7.13968	7.87342	6.06282	5.95258	5.91034
A_55_P1979893	-1.36924	12.2448	-10.4305	5.91309e-05	0.0049626	2.54798	ENSMUSG00000022389	Gencode.M18_pc	Tef	thyrotroph embryonic factor [Source:MGI Symbol;Acc:MGI:98663]	protein_coding	CGGAGTGATGTGTTATGGAGGGAAGTTGGGAATGTATCCTTTTCAAACAAAATTAAATAT	Tef	thyrotroph embryonic factor	chr15:81657221-81657280	NM_017376	21685	TEF	12.7796	13.1363	12.8722	11.558	11.7147	11.4076
A_55_P2166282	-1.36895	8.36304	-6.32143	0.000858269	0.0187172	-0.373201	ENSMUSG00000029648	Gencode.M18_pc	Flt1	FMS-like tyrosine kinase 1 [Source:MGI Symbol;Acc:MGI:95558]	protein_coding	GGAGGGTACTGCCGTTCCTGTGTGGTATTTTTAATATTATAATGTATTGCATCTTAATGT	Flt1	FMS-like tyrosine kinase 1	chr5:148446931-148446872	NA	14254	FLT1	8.92026	8.81977	9.4025	7.98858	7.39377	7.65334
A_55_P2107447	-1.36885	14.0229	-13.2652	1.5548e-05	0.00257811	3.93793	ENSMUSG00000020732	Gencode.M18_pc	Rab37	RAB37, member RAS oncogene family [Source:MGI Symbol;Acc:MGI:1929945]	protein_coding	TAGCTCTGGGCCTCTGGCATTTCTGTTTTTCCAGAATTAAATTGCAGTATTTTGGAAAAT	Rab37	RAB37, member RAS oncogene family	chr11:115023488-115023547	NM_001163753	58222	RAB37	14.8423	14.7486	14.5312	13.2665	13.3678	13.3812
A_55_P2236228	-1.36884	5.9916	-9.59407	9.35286e-05	0.0059546	2.05739	ENSMUSG00000086155	Gencode M18	9430041J12Rik	RIKEN cDNA 9430041J12 gene [Source:MGI Symbol;Acc:MGI:1924573]	antisense	TCAGGAAAATGAATGGAACTGGGGATCATTGTATTCAGGGAAATAAGATAGACCCAGAAA	9430041J12Rik	RIKEN cDNA 9430041J12 gene	chr7:4026164-4026105	AK051461	77323	9430041J12RIK	6.58654	6.95627	6.48524	5.21921	5.28748	5.41486
A_55_P2096395	-1.36817	9.79343	-4.91283	0.00300111	0.0369538	-1.76543	ENSMUSG00000026490	Gencode.M18_pc	Cdc42bpa	CDC42 binding protein kinase alpha [Source:MGI Symbol;Acc:MGI:2441841]	protein_coding	GGATTTCTCACCAATATTTTATGTTGGTATCACCTAATTAACCAGACTTTGATGTTCTGC	Cdc42bpa	CDC42 binding protein kinase alpha	chr1:182095655-182095714	NM_001033285	226751	CDC42BPA	9.99949	11.0601	10.373	8.92107	9.25249	9.15446
A_52_P430274	-1.36576	12.5597	-7.46677	0.00036046	0.012035	0.586634	ENSMUSG00000025857	Gencode.M18_pc	Dnaaf5	dynein, axonemal assembly factor 5 [Source:MGI Symbol;Acc:MGI:3616079]	protein_coding	TCGTGTCCAACAAATTTTAACATTTCTGCTTTGCCATTTATGGAATTAAATTATTTATTA	Dnaaf5	dynein, axonemal assembly factor 5	chr5:139662397-139662456	NM_001081265	433956	DNAAF5	13.2284	13.5915	12.908	11.7668	11.9755	11.8883
A_55_P2167984	-1.36425	11.5607	-6.6316	0.000670616	0.016489	-0.0995157	ENSMUSG00000003948	Gencode.M18_pc	Mmd	monocyte to macrophage differentiation-associated [Source:MGI Symbol;Acc:MGI:1914718]	protein_coding	TTTGAGAACTTGTGCTGTAGGTTAGAATAAAGTTGTTACTTGGGTTGACTCCATTGTCTG	Mmd	monocyte to macrophage differentiation-associated	chr11:90139840-90139899	NA	67468	MMD	12.2491	12.64	11.8395	10.7957	10.9486	10.8916
A_66_P126415	-1.3629	10.0843	-10.1556	6.84864e-05	0.00525069	2.39145	ENSMUSG00000106357	Gencode M18	Gm8013	predicted gene 8013 [Source:MGI Symbol;Acc:MGI:3648644]	lincRNA	AGACGGCTATTATGTCATGTGGTGAGAACTGTGTACGGTGATTTTACAGTGAGGAAACAA	Gm8013	predicted gene 8013	chr5:97363763-97363822	NR_131152	666266	GM8013	10.5111	10.9288	10.8573	9.2845	9.48967	9.43437
A_52_P182298	-1.36283	5.72026	-4.48433	0.00461362	0.0473464	-2.24319	ENSMUSG00000039097	Gencode.M18_pc	Rln1	relaxin 1 [Source:MGI Symbol;Acc:MGI:97931]	protein_coding	AGCCAGCAATGTTGCCACGTCGGTTGTAGCAGAAGATCTATTGCTAAACTCTATTGCTGA	Rln1	relaxin 1	chr19:29406369-29406310	NM_011272	19773	RLN1	5.72132	6.59018	6.89355	5.01864	5.15782	4.94008
A_51_P520718	-1.36242	12.7738	-8.19478	0.000219618	0.0092618	1.13069	ENSMUSG00000040016	Gencode.M18_pc	Ptger3	prostaglandin E receptor 3 (subtype EP3) [Source:MGI Symbol;Acc:MGI:97795]	protein_coding	CTAAATGTTCAGCTAGAGCTGTTAAAAGGAAAACCAGCTAATTATCATTCCAGTCCAATG	Ptger3	prostaglandin E receptor 3 (subtype EP3)	chr3:157307508-157307567	NM_011196	19218	PTGER3	13.4352	13.7527	13.1773	12.1758	11.9305	12.1716
A_55_P2345425	-1.36156	6.81437	-21.0918	1.12956e-06	0.000835093	6.40271	ENSMUSG00000069835	Gencode.M18_pc	Sat2	spermidine/spermine N1-acetyl transferase 2 [Source:MGI Symbol;Acc:MGI:1916465]	protein_coding	TTCTGCAAACGTGGGAGTTGTCTGTGATCTTTGATTTTTGACAGTGAGGCTCGGAATGGC	Sat2	spermidine/spermine N1-acetyl transferase 2	chr11:69435714-69435773	NM_026991	69215	SAT2	7.5095	7.5032	7.47275	6.16962	6.10861	6.12253
A_55_P2079425	-1.36111	12.279	-7.22229	0.000429636	0.0130623	0.393036	ENSMUSG00000027351	Gencode.M18_pc	Spred1	sprouty protein with EVH-1 domain 1, related sequence [Source:MGI Symbol;Acc:MGI:2150016]	protein_coding	GTGATATGCTCCAGCAAACAGGTTAAAAATACTTTGAGGTCAAATTGTCTTGGTTTTGTT	Spred1	sprouty protein with EVH-1 domain 1, related sequence	chr2:117004952-117005011	NM_033524	114715	SPRED1	12.7863	13.3754	12.717	11.5866	11.5281	11.6805
A_66_P106418	-1.35977	12.1402	-4.7541	0.003509	0.0403948	-1.93925	ENSMUSG00000005034	Gencode.M18_pc	Prkacb	protein kinase, cAMP dependent, catalytic, beta [Source:MGI Symbol;Acc:MGI:97594]	protein_coding	CTGCTTGTTGTAAGAATCAAATGAAATAATGTATGTAAAGGCACCTTGTAAACTGTACGC	Prkacb	protein kinase, cAMP dependent, catalytic, beta	chr3:146392748-146392689	NM_011100	18749	PRKACB	12.9782	13.2813	12.2007	11.2763	11.5256	11.579
A_55_P2093595	-1.35937	11.9097	-6.34766	0.000840246	0.0185975	-0.349641	ENSMUSG00000003948	Gencode.M18_pc	Mmd	monocyte to macrophage differentiation-associated [Source:MGI Symbol;Acc:MGI:1914718]	protein_coding	CCACTAAACTGTATTTGAGAACTTGTGCTGTAGGTTAGAATAAAGTTGTTACTTGGGTTG	Mmd	monocyte to macrophage differentiation-associated	chr11:90139827-90139886	NM_026178	67468	MMD	12.5642	13.0202	12.1837	11.1399	11.2699	11.2803
A_51_P439612	-1.35826	10.5011	-11.3547	3.69906e-05	0.0038729	3.04343	ENSMUSG00000026203	Gencode.M18_pc	Dnajb2	DnaJ heat shock protein family (Hsp40) member B2 [Source:MGI Symbol;Acc:MGI:1928739]	protein_coding	ACTTCTTGCTAGACTCGGGTTGAAGTGAGCAGATTCCTGTAGCATCTGAGAGAGTTTGTT	Dnajb2	DnaJ heat shock protein family (Hsp40) member B2	chr1:75241802-75241861	NM_020266	56812	DNAJB2	11.1527	11.3368	11.0511	9.80872	9.67325	9.98386
A_55_P2081055	-1.35755	7.60757	-5.40789	0.00188213	0.0282444	-1.24631	ENSMUSG00000044854	Gencode.M18_pc	1700056E22Rik	RIKEN cDNA 1700056E22 gene [Source:MGI Symbol;Acc:MGI:1920613]	protein_coding	TATCAGGGAAGGTACAGAAGAATGACCCTGGAATTCAAAGGAGTGGAAAAGCCCAGATGA	1700056E22Rik	RIKEN cDNA 1700056E22 gene	chr1:185857094-185857035	NM_028516	73363	1700056E22RIK	8.74481	8.28095	7.83327	6.80149	7.18136	6.80353
A_55_P2083481	-1.35648	10.0307	-6.41544	0.000795643	0.0180143	-0.289105	ENSMUSG00000020593	Gencode.M18_pc	Lpin1	lipin 1 [Source:MGI Symbol;Acc:MGI:1891340]	protein_coding	AGGTCTCATGTGGTCCACATAGTTCACAGGAATGTAATGAAAGCCACTGTCATCTGCTGT	Lpin1	lipin 1	chr12:16543754-16543695	NM_001130412	14245	LPIN1	10.2835	11.023	10.8203	9.16563	9.38018	9.51158
A_55_P2038372	-1.35638	6.9484	-4.97624	0.00282203	0.0356206	-1.69701	ENSMUSG00000043487	Gencode.M18_pc	Acot6	acyl-CoA thioesterase 6 [Source:MGI Symbol;Acc:MGI:1921287]	protein_coding	TGTGCTGATATTGTAGTTCTACACGGTCATGCCTAGTGCTATGCCTTGCCAAGGACAAAA	Acot6	acyl-CoA thioesterase 6	chr12:85450667-85450726	NM_172580	217700	ACOT6	7.45067	8.21267	7.21641	6.46122	6.09991	6.2495
A_55_P1974441	-1.35387	6.44377	-5.68987	0.00146241	0.0245834	-0.965555	ENSMUSG00000000489	Gencode.M18_pc	Pdgfb	platelet derived growth factor, B polypeptide [Source:MGI Symbol;Acc:MGI:97528]	protein_coding	ACTCCAGGCTGCAGGCTTCTCTTGACTCCAAGAACCTGGAACAAGTGTGCAGGAGCCTTG	Pdgfb	platelet derived growth factor, B polypeptide	chr15:79827497-79827438	NM_011057	18591	PDGFB	7.36983	7.39034	6.60195	5.65323	5.69584	5.95145
A_55_P1970105	-1.35356	6.3126	-16.48	4.58315e-06	0.00156631	5.13927	ENSMUSG00000002020	Gencode.M18_pc	Ltbp2	latent transforming growth factor beta binding protein 2 [Source:MGI Symbol;Acc:MGI:99502]	protein_coding	AAATGCACTTCCATACAAGCTAGCTGGGGGTTCAGGAGCATGGGGGAATAAAATGTTCAT	Ltbp2	latent transforming growth factor beta binding protein 2	chr12:86124226-86124167	NM_013589	16997	LTBP2	7.05716	6.8816	7.02939	5.64948	5.56982	5.68816
A_55_P2124153	-1.35308	9.17663	-4.46833	0.00469063	0.0478117	-2.26156	ENSMUSG00000035969	Gencode.M18_pc	Rusc2	RUN and SH3 domain containing 2 [Source:MGI Symbol;Acc:MGI:2140371]	protein_coding	GTCAGAGTAGGGAGGAGCCCGGGCTTCTGTTTATGTATGTATTTATTTATTTATTATTTA	Rusc2	RUN and SH3 domain containing 2	chr4:43439862-43439921	NM_001037709	100213	RUSC2	9.87689	9.87868	9.80394	7.83823	9.05261	8.60945
A_51_P219505	-1.34781	10.5482	-4.44365	0.00481227	0.0484878	-2.28996	ENSMUSG00000034591	Gencode.M18_pc	Slc41a2	solute carrier family 41, member 2 [Source:MGI Symbol;Acc:MGI:2442940]	protein_coding	TAAGACACATGTAGTGGGCAGAAATAGACTCGGACTGAATGCATTGTGAAGGGATATGCA	Slc41a2	solute carrier family 41, member 2	chr10:82694095-82694036	NM_177388	338365	SLC41A2	11.2699	10.5831	11.8132	9.84923	9.903	9.87053
A_51_P187750	-1.34599	11.5151	-8.00294	0.000249309	0.00988127	0.991822	ENSMUSG00000047180	Gencode.M18_pc	Neurl3	neuralized E3 ubiquitin protein ligase 3 [Source:MGI Symbol;Acc:MGI:2429944]	protein_coding	AATTTCCTGATTGGGTTAATTGAGTTGTAAACCCACCTTGAATGTGGCTGGCACCATTTC	Neurl3	neuralized E3 ubiquitin protein ligase 3	chr1:36322313-36322254	NM_153408	214854	NEURL3	12.4607	12.124	11.9795	10.774	10.6733	11.0789
A_55_P2109932	-1.34526	11.2088	-9.69598	8.82799e-05	0.00584384	2.11949	ENSMUSG00000036026	Gencode.M18_pc	Tmem63b	transmembrane protein 63b [Source:MGI Symbol;Acc:MGI:2387609]	protein_coding	CACTGGAAAATGGGGTTTTTGCACTGGGTTTGTTGGTTTTTTGTTTTTGTTTTTGTTTTC	Tmem63b	transmembrane protein 63b	chr17:45797210-45797151	NM_198167	224807	TMEM63B	12.1235	11.7673	11.7533	10.363	10.6154	10.63
A_55_P2115467	-1.34355	9.04016	-11.2517	3.89054e-05	0.00401212	2.99047	ENSMUSG00000036026	Gencode.M18_pc	Tmem63b	transmembrane protein 63b [Source:MGI Symbol;Acc:MGI:2387609]	protein_coding	TTCCAGTCATGCGAGGACAGCCTCATAGAGAATGAGATTCACCAGTAAGGGGAGGGAGGG	Tmem63b	transmembrane protein 63b	chr17:45797785-45797726	NM_198167	224807	TMEM63B	9.9126	9.73292	9.49028	8.35834	8.3733	8.3735
A_55_P2061386	-1.34307	12.0889	-11.1839	4.02297e-05	0.0040595	2.9553	ENSMUSG00000018474	Gencode.M18_pc	Chd3	chromodomain helicase DNA binding protein 3 [Source:MGI Symbol;Acc:MGI:1344395]	protein_coding	CTGTCCCAATCCCTTCTTCTGTATCAGGTTATCGGTTGTACATATAAATTATACTTTCCT	Chd3	chromodomain helicase DNA binding protein 3	chr11:69156837-69156778	NM_146019	216848	CHD3	12.8252	12.8035	12.6526	11.6368	11.2808	11.3344
A_52_P165773	-1.33956	5.73697	-4.6347	0.00395591	0.043203	-2.07244	ENSMUSG00000030350	Gencode.M18_pc	Prmt8	protein arginine N-methyltransferase 8 [Source:MGI Symbol;Acc:MGI:3043083]	protein_coding	AGGAAATCTACGGGACCATATCCATGAAGCCAAATGCCAAAAATGTGCGAGACCTCGATT	Prmt8	protein arginine N-methyltransferase 8	chr6:127640674-127639914	NM_201371	381813	PRMT8	6.53113	6.90528	5.78386	4.9171	5.17876	5.10572
A_55_P2008437	-1.33921	15.1472	-5.44485	0.00181992	0.0276778	-1.20891	ENSMUSG00000044303	Gencode.M18_pc	Cdkn2a	cyclin dependent kinase inhibitor 2A [Source:MGI Symbol;Acc:MGI:104738]	protein_coding	GGCATGAGAAACTGAGCGAAGGCGGCCGCGAAGGGAATAATGGCTGGATTGTTTAAAAAA	Cdkn2a	cyclin-dependent kinase inhibitor 2A	chr4:88920464-88920405	NM_009877	12578	CDKN2A	15.4426	15.9446	16.0632	14.2075	14.3273	14.898
A_55_P2041141	-1.33907	6.8472	-4.73277	0.00358443	0.0408497	-1.96289	ENSMUSG00000033219	Gencode.M18_pc	Gm9758	predicted gene 9758 [Source:MGI Symbol;Acc:MGI:3704245]	protein_coding	CCTGCTGAGCACCATCTCCAGGACCCACAATCTTCCTCGGATGAATCTTCTTCCATATAA	LOC105242399	spermatogenesis associated glutamate (E)-rich protein-like	chr5:14934092-14934033	NM_001310450	105242399	GM9758	7.21895	8.1738	7.15746	6.11668	6.16773	6.24858
A_66_P132249	-1.33902	15.7545	-5.70826	0.001439	0.0243538	-0.947601	ENSMUSG00000021213	Gencode.M18_pc	Akr1c13	aldo-keto reductase family 1, member C13 [Source:MGI Symbol;Acc:MGI:1351662]	protein_coding	TGTGTGGACAGTGATGCTGGCAATATGACCAAGATGGACTGTTGGATGGACTTGTCATTT	Akr1c13	aldo-keto reductase family 1, member C13	chr13:4204668-4204727	NM_013778	27384	AKR1C13	16.42	16.7652	16.0868	15.4573	14.8539	14.9437
A_51_P449824	-1.33859	6.90913	-4.59667	0.00411155	0.0442835	-2.1153	ENSMUSG00000011263	Gencode.M18_pc	Exoc3l2	exocyst complex component 3-like 2 [Source:MGI Symbol;Acc:MGI:1921713]	protein_coding	GCACTTGCACAATTCCACATGTATTTAATCTCAGCGTGGCCATGCTCTGTCATTGTCTGA	Exoc3l2	exocyst complex component 3-like 2	chr7:20081771-20081830	XM_006540475	74463	EXOC3L2	7.73374	8.05858	6.94294	6.19322	6.12603	6.40025
A_55_P2107667	-1.33827	12.1431	-5.47824	0.00176574	0.0271554	-1.17528	ENSMUSG00000022995	Gencode.M18_pc	Enah	ENAH actin regulator [Source:MGI Symbol;Acc:MGI:108360]	protein_coding	CTTTTAATAGAACTAAAGTGAGGCTTAAGTGGTAGGGAGTGTCTGCTGTTACACCCTGAG	Enah	enabled homolog (Drosophila)	chr1:183834635-183834576	NM_010135	13800	ENAH	12.3504	13.278	12.8083	11.6479	11.3288	11.4452
A_55_P1998374	-1.33805	11.9507	-8.07526	0.0002376	0.00957431	1.04454	ENSMUSG00000016487	Gencode.M18_pc	Ppfibp1	PTPRF interacting protein, binding protein 1 (liprin beta 1) [Source:MGI Symbol;Acc:MGI:1914783]	protein_coding	GCAGACTGTTACAGATGCCAAATATTCTTTATCAAGGACAATGTAACAACTGATGATATG	Ppfibp1	PTPRF interacting protein, binding protein 1 (liprin beta 1)	chr6:146980388-146980447	NM_001170433	67533	PPFIBP1	12.5204	12.8138	12.5251	11.0966	11.5935	11.1551
A_55_P2182134	-1.33784	11.2382	-6.78504	0.000595575	0.0155891	0.0319488	ENSMUSG00000021596	Gencode.M18_pc	Mctp1	multiple C2 domains, transmembrane 1 [Source:MGI Symbol;Acc:MGI:1926021]	protein_coding	GACTGCAAGATGACTTTATGGGCTCAGCCTTTCTTGATCTCACTCAGTTGGAGTTAAACA	Mctp1	multiple C2 domains, transmembrane 1	chr13:76851360-76851419	NM_030174	78771	MCTP1	11.6978	12.3259	11.6977	10.514	10.7293	10.4646
A_55_P1987013	-1.33726	6.0496	-4.43713	0.00484498	0.0486518	-2.29748	NA	Agilent eArray	Gm10372	predicted gene 10372	NA	GAAAGGAAAAAACAAAATGGCTGGAAAAGTTCAACAGGTTCATTGAGCTCCAGATGCTAA	Gm10372	predicted gene 10372	chr11:85532530-85532471	AK137618	100038438	GM10372	7.41121	6.39037	6.3531	5.23866	5.45592	5.44832
A_55_P2079430	-1.33549	13.5069	-10.0004	7.45286e-05	0.00542224	2.30108	ENSMUSG00000027351	Gencode.M18_pc	Spred1	sprouty protein with EVH-1 domain 1, related sequence [Source:MGI Symbol;Acc:MGI:2150016]	protein_coding	CATTAATATTTTCAGTTTGTTTAACCACTTTGCTGCTAAGATTTTGCCATCCCGTTCCCA	Spred1	sprouty protein with EVH-1 domain 1, related sequence	chr2:117005906-117005965	NM_033524	114715	SPRED1	14.0517	14.4438	14.0285	12.79	12.7992	12.9283
A_55_P2024366	-1.33516	6.05132	-8.93961	0.000137387	0.00737234	1.64185	ENSMUSG00000035275	Gencode.M18_pc	Raver2	ribonucleoprotein, PTB-binding 2 [Source:MGI Symbol;Acc:MGI:2443623]	protein_coding	GCTGTTAGTTTTCTGTGTCAGCTAATGGTTTGAAATGCTTTTCAAGATGCAAGCTTAATA	Raver2	ribonucleoprotein, PTB-binding 2	chr4:100824894-100824953	NM_183024	242570	RAVER2	6.60217	6.67394	6.88058	5.1752	5.65001	5.326
A_55_P2117741	-1.33493	13.0511	-6.27832	0.000888878	0.0190987	-0.412107	ENSMUSG00000066877	Gencode.M18_pc	Nck2	non-catalytic region of tyrosine kinase adaptor protein 2 [Source:MGI Symbol;Acc:MGI:1306821]	protein_coding	CAATTGAAGAAGGGGTCTTGGGATCCCCTAAACTTGCATACCCGGTTTTTTGAATATTGT	Nck2	non-catalytic region of tyrosine kinase adaptor protein 2	chr1:43627281-43627340	NM_010879	17974	NCK2	13.6344	14.1141	13.4072	12.5025	12.1296	12.5188
A_66_P133204	-1.33278	8.71414	-12.3804	2.28674e-05	0.00315338	3.54349	ENSMUSG00000044864	Gencode.M18_pc	Ankrd50	ankyrin repeat domain 50 [Source:MGI Symbol;Acc:MGI:2139777]	protein_coding	TTCAACTACAAGAAGGAAACGCCCTTGTGAGAGGTTCCAGTTGTATGAGACAGAAGGCAT	Ankrd50	ankyrin repeat domain 50	chr3:38352995-38351401	XM_011249725	99696	ANKRD50	9.49197	9.23947	9.41016	7.90703	8.07321	8.16302
A_55_P2429432	-1.33043	10.5792	-8.49959	0.000180475	0.00842511	1.34511	ENSMUSG00000059482	Gencode.M18_pc	2610301B20Rik	RIKEN cDNA 2610301B20 gene [Source:MGI Symbol;Acc:MGI:1914407]	protein_coding	ACTGGGCACTCTGAAAGGAAGTACATTTTAGCCCAGATATGATCTGCTTGCTTTTCAGTT	2610301B20Rik	RIKEN cDNA 2610301B20 gene	chr4:10826216-10826275	NM_026005	67157	2610301B20RIK	10.9759	11.4746	11.2828	10.0668	9.92954	9.74575
A_55_P2083489	-1.32984	12.4257	-14.2988	1.02057e-05	0.00213406	4.36072	ENSMUSG00000026483	Gencode.M18_pc	Fam129a	family with sequence similarity 129, member A [Source:MGI Symbol;Acc:MGI:2137237]	protein_coding	TAATCACCTTTTAAGGAAACTCAGATGGGGCAAGAGATTTCATTGGCACAAATTAGCCTT	Fam129a	family with sequence similarity 129, member A	chr1:153566107-153566166	NM_022018	63913	FAM129A	13.2516	12.9979	13.0222	11.7495	11.7993	11.7334
A_55_P2141093	-1.32867	12.2517	-12.9827	1.75382e-05	0.00276234	3.81547	ENSMUSG00000017897	Gencode.M18_pc	Eya2	EYA transcriptional coactivator and phosphatase 2 [Source:MGI Symbol;Acc:MGI:109341]	protein_coding	GGCAAGGGTACTCGGCCATGATGGATAAAGGCATTCAATAAAAACCACGTTTACATTTTA	Eya2	EYA transcriptional coactivator and phosphatase 2	chr2:165597072-165597131	NM_010165	14049	EYA2	12.8475	12.8657	13.0348	11.7245	11.5809	11.4566
A_51_P184508	-1.3277	5.78409	-4.99484	0.00277185	0.0352615	-1.67705	ENSMUSG00000091358	Gencode M18	Speer5-ps1	spermatogenesis associated glutamate (E)-rich protein 5, pseudogene 1 [Source:MGI Symbol;Acc:MGI:1917615]	transcribed_processed_pseudogene	TAATATTGAAGCAGGAGAGCAAGGAAGTACAGGCTGATTGGGCCATCATCCATCAATATT	Speer5-ps1	spermatogenesis associated glutamate (E)-rich protein 5, pseudogene 1	chr10:43937974-43938033	NR_001582	70365	SPEER5-PS1	6.37648	7.00478	5.96256	5.14314	4.99559	5.22197
[truncated: 2,670 more rows]
