# Supplementary material for: TGFβ Inhibitor A83-01 Enhances Murine HSPC Expansion for Gene Therapy
Source: Cells. 2023 Jul 31;12(15):1978. doi: 10.3390/cells12151978 (PMC10416825; doi:10.3390/cells12151978)
Supplement: Supplementary file 1 [file cells-12-01978-s001.zip › Supplementary Table S3_GOBP_M5.xlsx]

## Sheet: Sheet1
	pathway	pval	padj	log2err	ES	NES	size
1053	GOBP_DEFENSE_RESPONSE_TO_OTHER_ORGANISM	4.04351e-18	4.3023e-14	1.09593	0.409128	1.78154	900
6938	GOBP_RESPONSE_TO_VIRUS	4.4386e-17	2.36134e-13	1.06721	0.548787	2.20531	300
1983	GOBP_INNATE_IMMUNE_RESPONSE	5.01314e-16	1.77799e-12	1.02767	0.435981	1.86069	651
1054	GOBP_DEFENSE_RESPONSE_TO_SYMBIONT	9.11299e-16	2.42405e-12	1.01754	0.57449	2.28	248
343	GOBP_BIOLOGICAL_PROCESS_INVOLVED_IN_INTERSPECIES_INTERACTION_BETWEEN_ORGANISMS	1.29056e-15	2.7463e-12	1.01754	0.358031	1.57681	1286
10215	GOMF_RNA_BINDING	1.73456e-14	3.07595e-11	0.975995	0.381784	1.67004	967
8430	GOCC_NUCLEAR_PROTEIN_CONTAINING_COMPLEX	1.06195e-13	1.61416e-10	0.954542	0.358281	1.57952	1147
1207	GOBP_DNA_REPAIR	1.88378e-13	2.50542e-10	0.943632	0.453441	1.90153	484
7029	GOBP_RNA_PROCESSING	2.80711e-13	3.31862e-10	0.932595	0.393854	1.70308	782
6834	GOBP_RESPONSE_TO_INTERFERON_BETA	2.71025e-12	2.8837e-09	0.898671	0.862549	2.53091	35
1948	GOBP_IMMUNE_RESPONSE	3.19253e-12	3.08805e-09	0.898671	0.338306	1.47767	1339
7928	GOCC_CHROMOSOMAL_REGION	4.57052e-12	4.05253e-09	0.887075	0.502833	2.02715	295
7929	GOCC_CHROMOSOME	8.62094e-12	7.05591e-09	0.875325	0.354714	1.54925	1024
1048	GOBP_DEFENSE_RESPONSE	1.74529e-11	1.32642e-08	0.863415	0.328519	1.45204	1417
713	GOBP_CELL_ADHESION	9.45818e-11	6.70901e-08	0.839089	-0.404986	-1.54015	1335
8254	GOCC_INTRINSIC_COMPONENT_OF_PLASMA_MEMBRANE	1.46293e-10	9.72847e-08	0.826657	-0.403659	-1.53293	1294
922	GOBP_COAGULATION	1.78654e-10	1.11816e-07	0.826657	-0.619039	-2.09754	173
891	GOBP_CHROMOSOME_ORGANIZATION	2.48281e-10	1.46762e-07	0.814036	0.423806	1.76666	455
7931	GOCC_CHROMOSOME_CENTROMERIC_REGION	2.78506e-10	1.55963e-07	0.814036	0.531426	2.06414	206
3867	GOBP_PATTERN_RECOGNITION_RECEPTOR_SIGNALING_PATHWAY	1.15807e-09	5.88056e-07	0.788187	0.561866	2.13519	160
8396	GOCC_NEURON_PROJECTION	1.16064e-09	5.88056e-07	0.788187	-0.390455	-1.48967	1456
7972	GOCC_CONDENSED_CHROMOSOME	3.54046e-09	1.7123e-06	0.774939	0.492275	1.9405	238
7031	GOBP_RNA_SPLICING	4.74854e-09	2.19672e-06	0.761461	0.434315	1.76428	359
4023	GOBP_PLATELET_ACTIVATION	5.03888e-09	2.2339e-06	0.761461	-0.674991	-2.11191	94
1200	GOBP_DNA_METABOLIC_PROCESS	6.19973e-09	2.63861e-06	0.761461	0.342352	1.48714	882
2088	GOBP_ION_TRANSPORT	6.9052e-09	2.82582e-06	0.761461	-0.385346	-1.46942	1430
4207	GOBP_POSITIVE_REGULATION_OF_CELL_PROJECTION_ORGANIZATION	1.04001e-08	3.68858e-06	0.74774	-0.485607	-1.77326	410
5500	GOBP_REGULATION_OF_BODY_FLUID_LEVELS	9.83404e-09	3.68858e-06	0.74774	-0.507405	-1.82497	342
6931	GOBP_RESPONSE_TO_TYPE_I_INTERFERON	9.44035e-09	3.68858e-06	0.74774	0.736728	2.35333	51
6944	GOBP_RESPONSE_TO_WOUNDING	1.0358e-08	3.68858e-06	0.74774	-0.473893	-1.74286	473
6765	GOBP_RESPONSE_TO_BACTERIUM	1.20527e-08	4.00754e-06	0.74774	0.377405	1.60678	577
8544	GOCC_PRESYNAPSE	1.17734e-08	4.00754e-06	0.74774	-0.454736	-1.68316	565
528	GOBP_CATION_TRANSPORT	1.47371e-08	4.7074e-06	0.74774	-0.405276	-1.53317	1090
6687	GOBP_REGULATION_OF_VIRAL_PROCESS	1.50425e-08	4.7074e-06	0.733762	0.548742	2.03321	143
7752	GOBP_WOUND_HEALING	2.57421e-08	7.60821e-06	0.733762	-0.496436	-1.7915	361
8716	GOCC_SYNAPSE	2.53746e-08	7.60821e-06	0.733762	-0.388575	-1.47941	1365
9080	GOMF_CATALYTIC_ACTIVITY_ACTING_ON_A_NUCLEIC_ACID	2.69342e-08	7.74539e-06	0.733762	0.38689	1.63043	496
2675	GOBP_MRNA_PROCESSING	2.82017e-08	7.89648e-06	0.733762	0.413485	1.70966	405
727	GOBP_CELL_CELL_SIGNALING	3.73817e-08	9.83861e-06	0.719513	-0.376443	-1.43704	1486
893	GOBP_CHROMOSOME_SEGREGATION	3.65671e-08	9.83861e-06	0.719513	0.438134	1.78221	322
1905	GOBP_HOMEOSTATIC_PROCESS	3.79119e-08	9.83861e-06	0.719513	-0.371185	-1.41901	1611
4283	GOBP_POSITIVE_REGULATION_OF_DEVELOPMENTAL_PROCESS	4.19214e-08	1.06201e-05	0.719513	-0.380604	-1.4491	1373
3516	GOBP_NEGATIVE_REGULATION_OF_VIRAL_PROCESS	4.47624e-08	1.10761e-05	0.719513	0.632805	2.17162	85
10274	GOMF_SIGNALING_RECEPTOR_BINDING	5.84375e-08	1.41313e-05	0.719513	-0.380215	-1.44782	1372
1049	GOBP_DEFENSE_RESPONSE_TO_BACTERIUM	6.56148e-08	1.55142e-05	0.704976	0.464061	1.84173	248
169	GOBP_ANATOMICAL_STRUCTURE_FORMATION_INVOLVED_IN_MORPHOGENESIS	7.46689e-08	1.72712e-05	0.704976	-0.387874	-1.46994	1151
6987	GOBP_RIBONUCLEOPROTEIN_COMPLEX_BIOGENESIS	8.01423e-08	1.77504e-05	0.704976	0.409578	1.6711	372
7895	GOCC_CELL_BODY	8.17454e-08	1.77504e-05	0.704976	-0.419184	-1.56986	781
8701	GOCC_SPLICEOSOMAL_COMPLEX	8.12748e-08	1.77504e-05	0.704976	0.508785	1.91842	170
771	GOBP_CELL_MORPHOGENESIS	8.36498e-08	1.78007e-05	0.704976	-0.392097	-1.48239	1077
910	GOBP_CIRCULATORY_SYSTEM_DEVELOPMENT	9.10195e-08	1.82433e-05	0.704976	-0.391364	-1.48211	1103
911	GOBP_CIRCULATORY_SYSTEM_PROCESS	9.25879e-08	1.82433e-05	0.704976	-0.454448	-1.67754	534
1178	GOBP_DIVALENT_INORGANIC_CATION_HOMEOSTASIS	9.04935e-08	1.82433e-05	0.704976	-0.490739	-1.76178	332
1209	GOBP_DNA_REPLICATION	9.07546e-08	1.82433e-05	0.704976	0.454295	1.80616	253
7973	GOCC_CONDENSED_CHROMOSOME_CENTROMERIC_REGION	9.64471e-08	1.86581e-05	0.704976	0.526225	1.95935	149
5629	GOBP_REGULATION_OF_CELL_PROJECTION_ORGANIZATION	1.05878e-07	2.01168e-05	0.704976	-0.422294	-1.57941	708
8413	GOCC_NUCLEAR_CHROMOSOME	1.10957e-07	2.07119e-05	0.704976	0.479586	1.87595	214
718	GOBP_CELL_CELL_ADHESION	1.18214e-07	2.16861e-05	0.704976	-0.410236	-1.53868	802
7549	GOBP_TUBE_DEVELOPMENT	1.3446e-07	2.42484e-05	0.690132	-0.386813	-1.46637	1113
6685	GOBP_REGULATION_OF_VIRAL_GENOME_REPLICATION	1.91806e-07	3.29163e-05	0.690132	0.637522	2.14409	70
7716	GOBP_VIRAL_GENOME_REPLICATION	1.91006e-07	3.29163e-05	0.690132	0.594906	2.12534	102
8521	GOCC_POSTSYNAPSE	1.90248e-07	3.29163e-05	0.690132	-0.414011	-1.54761	703
1641	GOBP_GENERATION_OF_NEURONS	2.11195e-07	3.56685e-05	0.690132	-0.368529	-1.40748	1530
2086	GOBP_ION_HOMEOSTASIS	2.4819e-07	4.12615e-05	0.674963	-0.437987	-1.62238	578
7072	GOBP_SECRETION	2.81076e-07	4.60099e-05	0.674963	-0.391378	-1.479	973
3513	GOBP_NEGATIVE_REGULATION_OF_VIRAL_GENOME_REPLICATION	3.05002e-07	4.917e-05	0.674963	0.729217	2.22851	42
1782	GOBP_G_PROTEIN_COUPLED_RECEPTOR_SIGNALING_PATHWAY	3.59478e-07	5.70872e-05	0.674963	-0.416407	-1.55621	701
3217	GOBP_NEGATIVE_REGULATION_OF_MULTICELLULAR_ORGANISMAL_PROCESS	3.72473e-07	5.8281e-05	0.674963	-0.388095	-1.46832	1085
26	GOBP_ACTIN_FILAMENT_BASED_PROCESS	4.08087e-07	6.29282e-05	0.674963	-0.414325	-1.55193	767
618	GOBP_CELLULAR_RESPONSE_TO_DNA_DAMAGE_STIMULUS	4.35236e-07	6.61559e-05	0.674963	0.339505	1.46549	734
6626	GOBP_REGULATION_OF_TRANSPORT	4.4471e-07	6.66438e-05	0.674963	-0.356094	-1.36355	1774
7144	GOBP_SISTER_CHROMATID_SEGREGATION	4.94492e-07	7.30749e-05	0.659444	0.474857	1.82424	200
5596	GOBP_REGULATION_OF_CELL_ADHESION	5.08623e-07	7.31317e-05	0.659444	-0.408276	-1.52967	755
7718	GOBP_VIRAL_PROCESS	5.06658e-07	7.31317e-05	0.659444	0.42659	1.7161	301
6151	GOBP_REGULATION_OF_MULTICELLULAR_ORGANISMAL_DEVELOPMENT	5.26693e-07	7.47202e-05	0.659444	-0.366341	-1.39574	1414
4467	GOBP_POSITIVE_REGULATION_OF_INTERFERON_BETA_PRODUCTION	5.37092e-07	7.51929e-05	0.659444	0.730763	2.21791	40
4195	GOBP_POSITIVE_REGULATION_OF_CELL_DIFFERENTIATION	6.60092e-07	9.12127e-05	0.659444	-0.396429	-1.49534	927
3379	GOBP_NEGATIVE_REGULATION_OF_RESPONSE_TO_STIMULUS	6.95827e-07	9.4918e-05	0.659444	-0.363981	-1.39017	1511
774	GOBP_CELL_MOTILITY	7.12392e-07	9.59475e-05	0.659444	-0.358775	-1.37206	1606
6639	GOBP_REGULATION_OF_TYPE_I_INTERFERON_MEDIATED_SIGNALING_PATHWAY	7.34945e-07	9.66914e-05	0.659444	0.758117	2.21934	34
7717	GOBP_VIRAL_LIFE_CYCLE	7.3609e-07	9.66914e-05	0.659444	0.461334	1.80167	213
6196	GOBP_REGULATION_OF_NEURON_PROJECTION_DEVELOPMENT	7.7175e-07	0.000100139	0.659444	-0.432895	-1.59776	524
5936	GOBP_REGULATION_OF_IMMUNE_RESPONSE	7.97015e-07	0.000102172	0.659444	0.334978	1.44824	737
7033	GOBP_RNA_SPLICING_VIA_TRANSESTERIFICATION_REACTIONS	8.40792e-07	0.00010599	0.659444	0.439736	1.74359	245
7662	GOBP_VASCULATURE_DEVELOPMENT	8.46727e-07	0.00010599	0.659444	-0.409689	-1.53029	735
5974	GOBP_REGULATION_OF_ION_TRANSPORT	8.60563e-07	0.00010647	0.659444	-0.416091	-1.55593	726
8678	GOCC_SOMATODENDRITIC_COMPARTMENT	8.95962e-07	0.000109575	0.659444	-0.389387	-1.47101	987
3665	GOBP_NUCLEAR_CHROMOSOME_SEGREGATION	9.42082e-07	0.000113906	0.659444	0.435064	1.73145	263
1494	GOBP_EXPORT_FROM_CELL	9.68764e-07	0.000115816	0.643552	-0.391689	-1.47472	900
432	GOBP_CALCIUM_ION_TRANSMEMBRANE_IMPORT_INTO_CYTOSOL	1.07229e-06	0.000125242	0.643552	-0.546703	-1.85704	170
847	GOBP_CHEMICAL_HOMEOSTASIS	1.08292e-06	0.000125242	0.643552	-0.393625	-1.48737	989
2475	GOBP_METAL_ION_HOMEOSTASIS	1.05968e-06	0.000125242	0.643552	-0.446714	-1.64201	484
3557	GOBP_NEUROGENESIS	1.10656e-06	0.000125688	0.643552	-0.356176	-1.36307	1748
5810	GOBP_REGULATION_OF_FAT_CELL_DIFFERENTIATION	1.1104e-06	0.000125688	0.643552	-0.57289	-1.89677	142
5494	GOBP_REGULATION_OF_BLOOD_PRESSURE	1.13392e-06	0.000126999	0.643552	-0.527951	-1.80848	201
2672	GOBP_MRNA_METABOLIC_PROCESS	1.22203e-06	0.000135441	0.643552	0.3432	1.47192	613
6792	GOBP_RESPONSE_TO_ENDOGENOUS_STIMULUS	1.26136e-06	0.00013836	0.643552	-0.369206	-1.4015	1291
7835	GOCC_AXON	1.28705e-06	0.000139737	0.643552	-0.409159	-1.52812	698
1218	GOBP_DNA_TEMPLATED_DNA_REPLICATION	1.32963e-06	0.000142902	0.643552	0.522422	1.93142	132
3946	GOBP_PHENOL_CONTAINING_COMPOUND_METABOLIC_PROCESS	1.34522e-06	0.000143131	0.643552	-0.612872	-1.9717	111
894	GOBP_CHROMOSOME_SEPARATION	1.47674e-06	0.000154	0.643552	0.528173	1.9326	122
2769	GOBP_NCRNA_PROCESSING	1.46986e-06	0.000154	0.643552	0.400002	1.63832	348
7808	GOCC_ANCHORING_JUNCTION	1.49079e-06	0.000154	0.643552	-0.423165	-1.56691	610
1230	GOBP_DOPAMINE_METABOLIC_PROCESS	1.52114e-06	0.000155624	0.643552	-0.749802	-2.07441	42
3381	GOBP_NEGATIVE_REGULATION_OF_RESPONSE_TO_WOUNDING	1.57444e-06	0.000159543	0.643552	-0.647313	-2.01339	89
559	GOBP_CELLULAR_DIVALENT_INORGANIC_CATION_HOMEOSTASIS	1.62691e-06	0.000163305	0.643552	-0.487395	-1.72972	297
1242	GOBP_DOUBLE_STRAND_BREAK_REPAIR	1.88578e-06	0.00018408	0.643552	0.436346	1.73036	243
1376	GOBP_ENZYME_LINKED_RECEPTOR_PROTEIN_SIGNALING_PATHWAY	1.87233e-06	0.00018408	0.643552	-0.392762	-1.48007	905
2020	GOBP_INTERFERON_BETA_PRODUCTION	1.87933e-06	0.00018408	0.643552	0.64316	2.09886	59
7552	GOBP_TUBE_MORPHOGENESIS	2.3813e-06	0.000230337	0.627257	-0.389337	-1.46618	901
8719	GOCC_SYNAPTIC_MEMBRANE	2.4254e-06	0.000232489	0.627257	-0.441498	-1.6195	451
2476	GOBP_METAL_ION_TRANSPORT	2.4802e-06	0.000234877	0.627257	-0.392406	-1.47166	847
8207	GOCC_HOST_CELLULAR_COMPONENT	2.49446e-06	0.000234877	0.627257	0.979954	1.84876	6
7008	GOBP_RIBOSOME_BIOGENESIS	2.7872e-06	0.000260139	0.627257	0.419714	1.67465	267
5667	GOBP_REGULATION_OF_COAGULATION	2.9262e-06	0.000270737	0.627257	-0.666178	-1.99994	71
527	GOBP_CATION_TRANSMEMBRANE_TRANSPORT	3.10119e-06	0.000284454	0.627257	-0.400553	-1.49872	747
8112	GOCC_EXTERNAL_ENCAPSULATING_STRUCTURE	3.53265e-06	0.00032126	0.627257	-0.429317	-1.57869	487
4652	GOBP_POSITIVE_REGULATION_OF_NEURON_PROJECTION_DEVELOPMENT	3.59736e-06	0.000324372	0.627257	-0.515727	-1.77275	210
7565	GOBP_TYPE_I_INTERFERON_PRODUCTION	3.68583e-06	0.000329556	0.627257	0.553374	1.95241	98
526	GOBP_CATECHOL_CONTAINING_COMPOUND_METABOLIC_PROCESS	3.74461e-06	0.000332022	0.627257	-0.698851	-2.02462	55
5613	GOBP_REGULATION_OF_CELL_DIFFERENTIATION	3.89897e-06	0.000340042	0.610527	-0.357301	-1.36531	1560
5627	GOBP_REGULATION_OF_CELL_POPULATION_PROLIFERATION	3.89107e-06	0.000340042	0.610527	-0.354798	-1.3566	1589
2925	GOBP_NEGATIVE_REGULATION_OF_CHROMOSOME_ORGANIZATION	4.25601e-06	0.000368162	0.610527	0.576689	1.96378	84
3944	GOBP_PHENOL_CONTAINING_COMPOUND_BIOSYNTHETIC_PROCESS	4.83455e-06	0.000414836	0.610527	-0.71075	-2.01509	49
735	GOBP_CELL_CYCLE_CHECKPOINT_SIGNALING	4.9903e-06	0.000424774	0.610527	0.474148	1.79098	166
435	GOBP_CALCIUM_ION_TRANSPORT	5.15388e-06	0.000435216	0.610527	-0.441403	-1.61165	412
568	GOBP_CELLULAR_ION_HOMEOSTASIS	5.54998e-06	0.000464975	0.610527	-0.434166	-1.59624	470
8656	GOCC_SIDE_OF_MEMBRANE	5.63861e-06	0.000468709	0.610527	-0.410883	-1.52317	597
4529	GOBP_POSITIVE_REGULATION_OF_LOCOMOTION	5.76002e-06	0.000468885	0.610527	-0.415959	-1.54055	574
5438	GOBP_REGULATION_OF_ANATOMICAL_STRUCTURE_MORPHOGENESIS	5.72997e-06	0.000468885	0.610527	-0.382626	-1.44298	930
7499	GOBP_TRANSMEMBRANE_RECEPTOR_PROTEIN_TYROSINE_KINASE_SIGNALING_PATHWAY	5.77292e-06	0.000468885	0.610527	-0.42009	-1.55464	576
6264	GOBP_REGULATION_OF_PATTERN_RECOGNITION_RECEPTOR_SIGNALING_PATHWAY	5.82727e-06	0.000469713	0.610527	0.562931	1.95908	89
2931	GOBP_NEGATIVE_REGULATION_OF_COAGULATION	6.40722e-06	0.000512577	0.610527	-0.716552	-2.04224	50
1998	GOBP_INORGANIC_ION_TRANSMEMBRANE_TRANSPORT	7.29378e-06	0.000579148	0.610527	-0.400639	-1.49742	714
5121	GOBP_PROTEIN_DNA_COMPLEX_SUBUNIT_ORGANIZATION	7.80489e-06	0.000615141	0.593325	0.458168	1.73306	172
2584	GOBP_MITOTIC_CELL_CYCLE_CHECKPOINT_SIGNALING	8.04134e-06	0.000629116	0.593325	0.496136	1.82551	129
772	GOBP_CELL_MORPHOGENESIS_INVOLVED_IN_DIFFERENTIATION	8.26436e-06	0.000641845	0.593325	-0.392458	-1.47115	788
761	GOBP_CELL_JUNCTION_ORGANIZATION	9.68747e-06	0.000746918	0.593325	-0.397794	-1.48722	723
1495	GOBP_EXTERNAL_ENCAPSULATING_STRUCTURE_ORGANIZATION	1.02929e-05	0.000787885	0.593325	-0.461909	-1.64994	309
556	GOBP_CELLULAR_COMPONENT_MORPHOGENESIS	1.04643e-05	0.000795287	0.593325	-0.385068	-1.44413	807
3523	GOBP_NEGATIVE_REGULATION_OF_WOUND_HEALING	1.06579e-05	0.000804253	0.593325	-0.647728	-1.95044	72
6785	GOBP_RESPONSE_TO_CYTOKINE	1.24252e-05	0.000931018	0.593325	0.316378	1.371	781
6697	GOBP_REGULATION_OF_WOUND_HEALING	1.28305e-05	0.000952473	0.593325	-0.563315	-1.82956	128
8604	GOCC_RIBONUCLEOPROTEIN_COMPLEX	1.28906e-05	0.000952473	0.593325	0.328919	1.40505	619
8163	GOCC_GLUTAMATERGIC_SYNAPSE	1.30534e-05	0.000957852	0.593325	-0.415615	-1.52906	496
124	GOBP_AMEBOIDAL_TYPE_CELL_MIGRATION	1.31582e-05	0.000958928	0.593325	-0.43116	-1.58047	446
2385	GOBP_MDA_5_SIGNALING_PATHWAY	1.35639e-05	0.000981765	0.593325	0.953425	1.84066	7
5656	GOBP_REGULATION_OF_CHROMOSOME_SEGREGATION	1.49586e-05	0.0010754	0.593325	0.515466	1.8792	120
8530	GOCC_POSTSYNAPTIC_MEMBRANE	1.51496e-05	0.00108182	0.593325	-0.458592	-1.64112	314
132	GOBP_AMINE_TRANSPORT	1.5576e-05	0.00109754	0.57561	-0.562433	-1.80921	119
5558	GOBP_REGULATION_OF_CATECHOLAMINE_METABOLIC_PROCESS	1.55171e-05	0.00109754	0.57561	-0.81292	-1.98164	23
2627	GOBP_MONOAMINE_TRANSPORT	1.62599e-05	0.00113694	0.57561	-0.587093	-1.86195	103
5119	GOBP_PROTEIN_DNA_COMPLEX_ASSEMBLY	1.63489e-05	0.00113694	0.57561	0.475919	1.76693	141
578	GOBP_CELLULAR_METAL_ION_HOMEOSTASIS	1.68571e-05	0.00116467	0.57561	-0.445381	-1.61934	386
1358	GOBP_ENDOTHELIAL_CELL_MIGRATION	1.7787e-05	0.00122099	0.57561	-0.497799	-1.71405	218
5943	GOBP_REGULATION_OF_INNATE_IMMUNE_RESPONSE	1.80718e-05	0.00122474	0.57561	0.425542	1.64121	202
7261	GOBP_SPINDLE_CHECKPOINT_SIGNALING	1.80164e-05	0.00122474	0.57561	0.654189	2.05548	46
742	GOBP_CELL_CYCLE_PROCESS	1.90794e-05	0.00128484	0.57561	0.292782	1.28595	1058
763	GOBP_CELL_MATRIX_ADHESION	2.02482e-05	0.0013465	0.57561	-0.486973	-1.67932	222
7043	GOBP_RRNA_METABOLIC_PROCESS	2.01957e-05	0.0013465	0.57561	0.418605	1.64719	225
7349	GOBP_SYNAPTIC_SIGNALING	2.04868e-05	0.00135391	0.57561	-0.393367	-1.46953	737
790	GOBP_CELL_SUBSTRATE_ADHESION	2.23294e-05	0.00146606	0.57561	-0.445735	-1.60341	354
3783	GOBP_ORGANELLE_FISSION	2.24594e-05	0.00146606	0.57561	0.350786	1.45791	458
758	GOBP_CELL_JUNCTION_ASSEMBLY	2.367e-05	0.00153566	0.57561	-0.42786	-1.56268	414
2087	GOBP_ION_TRANSMEMBRANE_TRANSPORT	2.52374e-05	0.00161763	0.57561	-0.377183	-1.42136	905
6021	GOBP_REGULATION_OF_LOCOMOTION	2.52131e-05	0.00161763	0.57561	-0.370463	-1.40107	1009
4948	GOBP_POSITIVE_REGULATION_OF_TYPE_I_INTERFERON_PRODUCTION	2.58064e-05	0.00164419	0.57561	0.593947	1.97617	63
1229	GOBP_DOPAMINE_BIOSYNTHETIC_PROCESS	2.66338e-05	0.00168175	0.57561	-0.864648	-1.92153	15
7449	GOBP_TOLL_LIKE_RECEPTOR_SIGNALING_PATHWAY	2.6712e-05	0.00168175	0.57561	0.505741	1.83205	110
8399	GOCC_NEURON_PROJECTION_TERMINUS	2.71966e-05	0.00170219	0.57561	-0.49529	-1.69806	206
176	GOBP_ANGIOGENESIS	2.79211e-05	0.00173731	0.57561	-0.411694	-1.51279	502
2392	GOBP_MEGAKARYOCYTE_DIFFERENTIATION	2.90988e-05	0.00180006	0.57561	-0.710821	-1.97323	44
358	GOBP_BLOOD_VESSEL_MORPHOGENESIS	2.98722e-05	0.00180591	0.57561	-0.398824	-1.47735	609
524	GOBP_CATECHOL_CONTAINING_COMPOUND_BIOSYNTHETIC_PROCESS	2.98013e-05	0.00180591	0.57561	-0.791022	-1.96844	25
7046	GOBP_RRNA_PROCESSING	2.93704e-05	0.00180591	0.57561	0.436036	1.67714	198
9520	GOMF_INORGANIC_MOLECULAR_ENTITY_TRANSMEMBRANE_TRANSPORTER_ACTIVITY	2.9786e-05	0.00180591	0.57561	-0.394256	-1.46806	661
6443	GOBP_REGULATION_OF_RESPONSE_TO_WOUNDING	3.04238e-05	0.00182887	0.57561	-0.524172	-1.77314	167
1212	GOBP_DNA_REPLICATION_INITIATION	3.14331e-05	0.00187636	0.557332	0.718339	2.01604	29
2225	GOBP_LOCOMOTION	3.15665e-05	0.00187636	0.557332	-0.355437	-1.34885	1289
433	GOBP_CALCIUM_ION_TRANSMEMBRANE_TRANSPORT	3.21357e-05	0.00189958	0.557332	-0.46634	-1.65559	293
4024	GOBP_PLATELET_AGGREGATION	3.30556e-05	0.00193248	0.557332	-0.661833	-1.90674	54
7436	GOBP_TISSUE_MORPHOGENESIS	3.28859e-05	0.00193248	0.557332	-0.390205	-1.45315	673
4614	GOBP_POSITIVE_REGULATION_OF_MULTICELLULAR_ORGANISMAL_PROCESS	3.39032e-05	0.0019712	0.557332	-0.34593	-1.32173	1534
2721	GOBP_MYELOID_CELL_DEVELOPMENT	3.49931e-05	0.00202351	0.557332	-0.606617	-1.8826	88
5657	GOBP_REGULATION_OF_CHROMOSOME_SEPARATION	3.55139e-05	0.00203762	0.557332	0.521865	1.86439	102
6833	GOBP_RESPONSE_TO_INTERFERON_ALPHA	3.56201e-05	0.00203762	0.557332	0.786471	2.03344	21
8117	GOCC_EXTRINSIC_COMPONENT_OF_CYTOPLASMIC_SIDE_OF_PLASMA_MEMBRANE	3.66495e-05	0.0020853	0.557332	-0.578425	-1.82927	102
5595	GOBP_REGULATION_OF_CELL_ACTIVATION	3.75584e-05	0.00212565	0.557332	-0.39792	-1.47609	624
2391	GOBP_MEGAKARYOCYTE_DEVELOPMENT	3.78434e-05	0.00213044	0.557332	-0.79846	-1.95894	24
3395	GOBP_NEGATIVE_REGULATION_OF_SIGNALING	3.95528e-05	0.00221496	0.557332	-0.355036	-1.34928	1303
7907	GOCC_CELL_SURFACE	4.00878e-05	0.00223316	0.557332	-0.372126	-1.3997	881
6628	GOBP_REGULATION_OF_TRANS_SYNAPTIC_SIGNALING	4.0819e-05	0.00226205	0.557332	-0.410592	-1.50863	507
7345	GOBP_SYNAPSE_ORGANIZATION	4.36832e-05	0.00240823	0.557332	-0.416851	-1.53298	468
328	GOBP_BEHAVIOR	4.39872e-05	0.00241249	0.557332	-0.386108	-1.44353	723
7500	GOBP_TRANSMEMBRANE_TRANSPORT	4.44002e-05	0.00242266	0.557332	-0.351365	-1.3328	1267
4636	GOBP_POSITIVE_REGULATION_OF_NATURAL_KILLER_CELL_MEDIATED_IMMUNITY	4.54464e-05	0.00246709	0.557332	-0.744683	-1.9595	31
1023	GOBP_CYTOPLASMIC_PATTERN_RECOGNITION_RECEPTOR_SIGNALING_PATHWAY	4.59943e-05	0.00247493	0.557332	0.649209	2.01511	44
3575	GOBP_NEURON_DEVELOPMENT	4.61891e-05	0.00247493	0.557332	-0.35873	-1.36087	1206
8260	GOCC_INTRINSIC_COMPONENT_OF_SYNAPTIC_MEMBRANE	4.62886e-05	0.00247493	0.557332	-0.482042	-1.67716	240
9084	GOMF_CATALYTIC_ACTIVITY_ACTING_ON_RNA	4.73031e-05	0.00251653	0.557332	0.382811	1.55089	310
9262	GOMF_DOUBLE_STRANDED_RNA_BINDING	4.79084e-05	0.00253605	0.557332	0.563394	1.89479	70
5606	GOBP_REGULATION_OF_CELL_CYCLE_CHECKPOINT	4.85987e-05	0.00255985	0.557332	0.653251	2.04793	45
6814	GOBP_RESPONSE_TO_GROWTH_FACTOR	4.8949e-05	0.00256477	0.557332	-0.393973	-1.46067	618
10447	GOMF_TRANSPORTER_ACTIVITY	4.91741e-05	0.00256477	0.557332	-0.363464	-1.37272	1065
4935	GOBP_POSITIVE_REGULATION_OF_TRANSPORT	4.98675e-05	0.00258825	0.557332	-0.366551	-1.38276	957
3643	GOBP_NONASSOCIATIVE_LEARNING	5.05695e-05	0.00261194	0.557332	-0.930964	-1.85995	9
7785	GOCC_ACTIN_FILAMENT_BUNDLE	5.10372e-05	0.00262336	0.557332	-0.589111	-1.82692	87
4182	GOBP_POSITIVE_REGULATION_OF_CELL_ADHESION	5.13939e-05	0.002629	0.557332	-0.414429	-1.52416	473
8047	GOCC_DISTAL_AXON	5.30207e-05	0.00269924	0.557332	-0.437222	-1.57781	361
7546	GOBP_TRYPTOPHAN_CATABOLIC_PROCESS	5.42066e-05	0.00274647	0.557332	0.938261	1.81138	7
4318	GOBP_POSITIVE_REGULATION_OF_ENDOTHELIAL_CELL_MIGRATION	5.74216e-05	0.00289557	0.557332	-0.570018	-1.8078	103
563	GOBP_CELLULAR_HOMEOSTASIS	5.84851e-05	0.00293529	0.557332	-0.384384	-1.43762	708
8037	GOCC_DENDRITIC_TREE	5.88023e-05	0.00293735	0.557332	-0.380828	-1.42045	680
6453	GOBP_REGULATION_OF_RIBONUCLEASE_ACTIVITY	5.96784e-05	0.00296719	0.557332	0.910996	1.84689	9
7966	GOCC_COLLAGEN_CONTAINING_EXTRACELLULAR_MATRIX	6.09243e-05	0.00301504	0.557332	-0.435024	-1.57233	366
6308	GOBP_REGULATION_OF_PLATELET_ACTIVATION	6.23749e-05	0.00307254	0.538434	-0.684236	-1.93942	48
6431	GOBP_REGULATION_OF_RESPONSE_TO_CYTOKINE_STIMULUS	6.43212e-05	0.00315381	0.538434	0.467279	1.71933	129
6430	GOBP_REGULATION_OF_RESPONSE_TO_BIOTIC_STIMULUS	6.66418e-05	0.00325261	0.538434	0.373601	1.51971	322
7103	GOBP_SEQUESTERING_OF_CALCIUM_ION	6.69802e-05	0.0032542	0.538434	-0.569	-1.83174	113
4494	GOBP_POSITIVE_REGULATION_OF_ION_TRANSPORT	7.06592e-05	0.00341203	0.538434	-0.4448	-1.59448	321
8125	GOCC_EXTRINSIC_COMPONENT_OF_PLASMA_MEMBRANE	7.08702e-05	0.00341203	0.538434	-0.501628	-1.70074	182
4807	GOBP_POSITIVE_REGULATION_OF_RESPONSE_TO_CYTOKINE_STIMULUS	7.37866e-05	0.00350486	0.538434	0.595511	1.93492	57
9283	GOMF_ENDOPEPTIDASE_ACTIVITY	7.32133e-05	0.00350486	0.538434	-0.426119	-1.54381	373
10284	GOMF_SINGLE_STRANDED_RNA_BINDING	7.37176e-05	0.00350486	0.538434	0.534739	1.83508	85
5973	GOBP_REGULATION_OF_ION_TRANSMEMBRANE_TRANSPORT	7.77207e-05	0.00367532	0.538434	-0.399323	-1.46912	496
4639	GOBP_POSITIVE_REGULATION_OF_NERVOUS_SYSTEM_DEVELOPMENT	7.86406e-05	0.00370237	0.538434	-0.436182	-1.56501	336
363	GOBP_BONE_CELL_DEVELOPMENT	8.00641e-05	0.00375278	0.538434	-0.700938	-1.92228	41
778	GOBP_CELL_PROJECTION_ORGANIZATION	8.08205e-05	0.00377162	0.538434	-0.344836	-1.3169	1514
5964	GOBP_REGULATION_OF_INTRACELLULAR_SIGNAL_TRANSDUCTION	8.18837e-05	0.00380455	0.538434	-0.343371	-1.31115	1516
2400	GOBP_MEIOTIC_CELL_CYCLE_PROCESS	8.42177e-05	0.00389598	0.538434	0.427269	1.62597	183
1970	GOBP_INDOLE_CONTAINING_COMPOUND_BIOSYNTHETIC_PROCESS	9.04265e-05	0.00414715	0.538434	-0.945182	-1.76238	7
2706	GOBP_MUSCLE_CONTRACTION	9.00378e-05	0.00414715	0.538434	-0.442406	-1.57917	303
2460	GOBP_MESENCHYME_DEVELOPMENT	9.14635e-05	0.00417049	0.538434	-0.442265	-1.57004	292
7899	GOCC_CELL_CELL_JUNCTION	9.1747e-05	0.00417049	0.538434	-0.407393	-1.49743	481
8822	GOMF_2_5_OLIGOADENYLATE_SYNTHETASE_ACTIVITY	9.21113e-05	0.00417049	0.538434	0.950286	1.79279	6
4703	GOBP_POSITIVE_REGULATION_OF_PATTERN_RECOGNITION_RECEPTOR_SIGNALING_PATHWAY	9.31406e-05	0.00419922	0.538434	0.642827	1.9645	42
773	GOBP_CELL_MORPHOGENESIS_INVOLVED_IN_NEURON_DIFFERENTIATION	9.42034e-05	0.00421597	0.538434	-0.391607	-1.45267	624
3374	GOBP_NEGATIVE_REGULATION_OF_RESPONSE_TO_EXTERNAL_STIMULUS	9.5097e-05	0.00421597	0.538434	-0.429737	-1.55068	363
6183	GOBP_REGULATION_OF_NERVOUS_SYSTEM_DEVELOPMENT	9.49491e-05	0.00421597	0.538434	-0.399468	-1.47317	523
8532	GOCC_POSTSYNAPTIC_SPECIALIZATION	9.44251e-05	0.00421597	0.538434	-0.424417	-1.55041	411
9099	GOMF_CELL_ADHESION_MOLECULE_BINDING	9.6847e-05	0.00427573	0.538434	-0.449919	-1.59364	280
2600	GOBP_MITOTIC_NUCLEAR_DIVISION	0.00010048	0.00441781	0.538434	0.380269	1.52918	282
2227	GOBP_LOCOMOTORY_BEHAVIOR	0.000101698	0.00445293	0.538434	-0.460516	-1.61054	249
10196	GOMF_RETINAL_BINDING	0.000102204	0.00445675	0.538434	-0.838334	-1.89823	17
2396	GOBP_MEIOTIC_CELL_CYCLE	0.000104655	0.00452655	0.538434	0.394161	1.55336	240
7353	GOBP_SYNAPTIC_TRANSMISSION_GLUTAMATERGIC	0.000104373	0.00452655	0.538434	-0.553353	-1.77081	110
5391	GOBP_RECOMBINATIONAL_REPAIR	0.000105837	0.00455913	0.538434	0.452865	1.67429	135
1206	GOBP_DNA_RECOMBINATION	0.000108862	0.00467055	0.538434	0.390326	1.55184	253
5529	GOBP_REGULATION_OF_CALCIUM_ION_TRANSPORT	0.000110584	0.00472535	0.538434	-0.44054	-1.55895	275
1756	GOBP_GRANULOCYTE_ACTIVATION	0.00011222	0.00477607	0.538434	0.642157	1.96462	41
8634	GOCC_SARCOLEMMA	0.000112919	0.0047867	0.538434	-0.50866	-1.70716	161
3971	GOBP_PHOSPHOLIPASE_C_ACTIVATING_G_PROTEIN_COUPLED_RECEPTOR_SIGNALING_PATHWAY	0.000115104	0.00485994	0.538434	-0.575751	-1.78618	91
6547	GOBP_REGULATION_OF_SYNAPTIC_PLASTICITY	0.000119128	0.00500998	0.538434	-0.469986	-1.626	228
31	GOBP_ACTIN_FILAMENT_ORGANIZATION	0.0001208	0.00506029	0.538434	-0.413652	-1.51407	421
313	GOBP_AXON_DEVELOPMENT	0.000122822	0.00506521	0.518848	-0.396907	-1.46167	513
6076	GOBP_REGULATION_OF_MEMBRANE_POTENTIAL	0.000122232	0.00506521	0.518848	-0.408635	-1.49895	451
7783	GOCC_ACTIN_CYTOSKELETON	0.000122682	0.00506521	0.518848	-0.409105	-1.50411	470
9453	GOMF_HEPARAN_SULFATE_SULFOTRANSFERASE_ACTIVITY	0.000121408	0.00506521	0.538434	-0.839667	-1.86602	15
776	GOBP_CELL_PART_MORPHOGENESIS	0.00012404	0.00509569	0.518848	-0.377012	-1.409	713
3482	GOBP_NEGATIVE_REGULATION_OF_TYPE_I_INTERFERON_MEDIATED_SIGNALING_PATHWAY	0.000125209	0.0051235	0.518848	0.799543	1.96149	17
9564	GOMF_ION_TRANSMEMBRANE_TRANSPORTER_ACTIVITY	0.00012568	0.0051235	0.518848	-0.376549	-1.41039	761
711	GOBP_CELL_ACTIVATION	0.000126612	0.00514181	0.518848	-0.359332	-1.35877	1027
4174	GOBP_POSITIVE_REGULATION_OF_CELLULAR_COMPONENT_ORGANIZATION	0.000128979	0.005218	0.518848	-0.359244	-1.35899	1095
10107	GOMF_PROTEIN_CONTAINING_COMPLEX_BINDING	0.000130713	0.00526814	0.518848	-0.342033	-1.30362	1403
697	GOBP_CELLULAR_RESPONSE_TO_VIRUS	0.000133354	0.00533415	0.518848	0.545259	1.83338	68
2959	GOBP_NEGATIVE_REGULATION_OF_DEVELOPMENTAL_PROCESS	0.00013301	0.00533415	0.518848	-0.366827	-1.38321	929
8507	GOCC_PLASMA_MEMBRANE_PROTEIN_COMPLEX	0.000145484	0.00579756	0.518848	-0.393564	-1.45724	552
7161	GOBP_SKELETAL_SYSTEM_DEVELOPMENT	0.000146628	0.00582136	0.518848	-0.391856	-1.44567	531
364	GOBP_BONE_DEVELOPMENT	0.000147207	0.0058226	0.518848	-0.468276	-1.62942	243
2588	GOBP_MITOTIC_CELL_CYCLE_PROCESS	0.000148761	0.00586229	0.518848	0.30948	1.33059	688
9088	GOMF_CATION_TRANSMEMBRANE_TRANSPORTER_ACTIVITY	0.000150881	0.00592387	0.518848	-0.391593	-1.45046	582
8017	GOCC_CYTOPLASMIC_SIDE_OF_MEMBRANE	0.000152787	0.00597668	0.518848	-0.484949	-1.64908	189
642	GOBP_CELLULAR_RESPONSE_TO_INTERFERON_ALPHA	0.000153758	0.00599261	0.518848	0.863423	1.88914	11
30	GOBP_ACTIN_FILAMENT_NETWORK_FORMATION	0.000154926	0.00601611	0.518848	-0.898671	-1.8772	11
9083	GOMF_CATALYTIC_ACTIVITY_ACTING_ON_DNA	0.000155641	0.00602187	0.518848	0.403191	1.56316	209
4188	GOBP_POSITIVE_REGULATION_OF_CELL_CYCLE_CHECKPOINT	0.000158637	0.0060935	0.518848	0.819537	1.92827	14
7699	GOBP_VESICLE_MEDIATED_TRANSPORT_IN_SYNAPSE	0.000158308	0.0060935	0.518848	-0.454233	-1.59221	256
7435	GOBP_TISSUE_MIGRATION	0.000163852	0.00627115	0.518848	-0.432683	-1.54712	313
2760	GOBP_NATURAL_KILLER_CELL_CYTOKINE_PRODUCTION	0.00016454	0.00627491	0.518848	-0.938584	-1.75008	7
1293	GOBP_EMBRYONIC_ORGAN_DEVELOPMENT	0.000166916	0.00634282	0.518848	-0.40141	-1.47594	500
6468	GOBP_REGULATION_OF_SECRETION	0.000168433	0.00637768	0.518848	-0.379311	-1.41607	688
2132	GOBP_KYNURENINE_METABOLIC_PROCESS	0.000171334	0.00646451	0.518848	0.942186	1.77751	6
6595	GOBP_REGULATION_OF_TOLL_LIKE_RECEPTOR_SIGNALING_PATHWAY	0.000173846	0.00653611	0.518848	0.569682	1.89847	65
2904	GOBP_NEGATIVE_REGULATION_OF_CELL_POPULATION_PROLIFERATION	0.000175809	0.00656355	0.518848	-0.382935	-1.42909	684
8509	GOCC_PLASMA_MEMBRANE_REGION	0.000175395	0.00656355	0.518848	-0.349263	-1.32352	1188
9699	GOMF_METAL_ION_TRANSMEMBRANE_TRANSPORTER_ACTIVITY	0.000177513	0.006604	0.518848	-0.41598	-1.51615	402
5170	GOBP_PROTEIN_LOCALIZATION_TO_CELL_JUNCTION	0.000184769	0.00684997	0.518848	-0.528481	-1.70032	114
2603	GOBP_MITOTIC_SISTER_CHROMATID_SEPARATION	0.000186489	0.00688974	0.518848	0.506682	1.77123	91
741	GOBP_CELL_CYCLE_PHASE_TRANSITION	0.000189027	0.00695932	0.518848	0.32309	1.36092	494
5609	GOBP_REGULATION_OF_CELL_CYCLE_PHASE_TRANSITION	0.000192894	0.00707721	0.518848	0.338402	1.39936	388
8552	GOCC_PRESYNAPTIC_MEMBRANE	0.000195245	0.00713887	0.518848	-0.480975	-1.64515	195
1912	GOBP_HOMOTYPIC_CELL_CELL_ADHESION	0.000198878	0.00721797	0.518848	-0.584365	-1.79676	79
4643	GOBP_POSITIVE_REGULATION_OF_NEUROGENESIS	0.00019862	0.00721797	0.518848	-0.439612	-1.55619	282
5048	GOBP_PRIMARY_AMINO_COMPOUND_METABOLIC_PROCESS	0.000199444	0.00721797	0.518848	-0.827158	-1.87292	17
2364	GOBP_MAST_CELL_ACTIVATION	0.00020095	0.00722332	0.518848	-0.587353	-1.79649	77
5570	GOBP_REGULATION_OF_CELLULAR_AMINE_METABOLIC_PROCESS	0.000200696	0.00722332	0.518848	-0.697102	-1.86616	36
8167	GOCC_GLYCOPROTEIN_IB_IX_V_COMPLEX	0.000208655	0.00747504	0.518848	-0.963366	-1.68366	5
4063	GOBP_POSITIVE_REGULATION_OF_3_UTR_MEDIATED_MRNA_STABILIZATION	0.000214477	0.00765782	0.518848	0.985291	1.54887	3
83	GOBP_ADENYLATE_CYCLASE_MODULATING_G_PROTEIN_COUPLED_RECEPTOR_SIGNALING_PATHWAY	0.000217887	0.00772774	0.518848	-0.475937	-1.63175	205
7132	GOBP_SIGNAL_RELEASE	0.000217784	0.00772774	0.518848	-0.38876	-1.43676	549
6129	GOBP_REGULATION_OF_MITOTIC_SISTER_CHROMATID_SEGREGATION	0.000220865	0.00778149	0.518848	0.602317	1.9213	49
7900	GOCC_CELL_CORTEX	0.000220303	0.00778149	0.518848	-0.444235	-1.5696	273
734	GOBP_CELL_CYCLE	0.000221841	0.00778452	0.518848	0.266005	1.16932	1536
5766	GOBP_REGULATION_OF_ENDOTHELIAL_CELL_MIGRATION	0.000222415	0.00778452	0.518848	-0.493794	-1.66253	164
38	GOBP_ACTION_POTENTIAL	0.000225116	0.00782757	0.518848	-0.507939	-1.68862	147
7338	GOBP_SUPRAMOLECULAR_FIBER_ORGANIZATION	0.000224743	0.00782757	0.518848	-0.372086	-1.38999	743
2652	GOBP_MORPHOGENESIS_OF_AN_EPITHELIUM	0.000228722	0.00792706	0.518848	-0.388189	-1.43871	570
5655	GOBP_REGULATION_OF_CHROMOSOME_ORGANIZATION	0.000232002	0.00801461	0.518848	0.393111	1.53972	220
6673	GOBP_REGULATION_OF_VASCULATURE_DEVELOPMENT	0.000236065	0.00812857	0.518848	-0.431178	-1.52666	279
345	GOBP_BIOLOGICAL_PROCESS_INVOLVED_IN_SYMBIOTIC_INTERACTION	0.000237788	0.0081615	0.518848	0.390773	1.52955	215
4206	GOBP_POSITIVE_REGULATION_OF_CELL_POPULATION_PROLIFERATION	0.000242737	0.00830457	0.518848	-0.356975	-1.3464	920
3545	GOBP_NEURAL_PRECURSOR_CELL_PROLIFERATION	0.000253637	0.00864966	0.498493	-0.470408	-1.60712	194
5557	GOBP_REGULATION_OF_CATALYTIC_ACTIVITY	0.00025702	0.00873703	0.498493	-0.334465	-1.27796	1638
2449	GOBP_MESENCHYMAL_CELL_DIFFERENTIATION	0.000259903	0.00880368	0.498493	-0.45619	-1.58674	236
5188	GOBP_PROTEIN_LOCALIZATION_TO_EXTRACELLULAR_REGION	0.000260635	0.00880368	0.498493	-0.412078	-1.48592	362
8259	GOCC_INTRINSIC_COMPONENT_OF_PRESYNAPTIC_MEMBRANE	0.000273303	0.00920236	0.498493	-0.520212	-1.68957	128
1288	GOBP_EMBRYONIC_HEMOPOIESIS	0.000277637	0.00931878	0.498493	-0.735794	-1.91895	30
7071	GOBP_SECOND_MESSENGER_MEDIATED_SIGNALING	0.000285789	0.00956226	0.498493	-0.436433	-1.54587	280
9300	GOMF_ERBB_3_CLASS_RECEPTOR_BINDING	0.00030276	0.0100983	0.498493	0.933965	1.762	6
6249	GOBP_REGULATION_OF_OSTEOBLAST_DIFFERENTIATION	0.000305268	0.0101502	0.498493	-0.511612	-1.66734	133
6062	GOBP_REGULATION_OF_MDA_5_SIGNALING_PATHWAY	0.000308859	0.0102376	0.498493	0.952678	1.7053	5
2850	GOBP_NEGATIVE_REGULATION_OF_CAMP_MEDIATED_SIGNALING	0.000311466	0.0102601	0.498493	-0.824732	-1.83282	15
7438	GOBP_TISSUE_REMODELING	0.00031061	0.0102601	0.498493	-0.474414	-1.61795	192
371	GOBP_BONE_REMODELING	0.000321129	0.0102916	0.498493	-0.539594	-1.7083	100
715	GOBP_CELL_ADHESION_MEDIATED_BY_INTEGRIN	0.000314935	0.0102916	0.498493	-0.567193	-1.7495	82
849	GOBP_CHEMICAL_SYNAPTIC_TRANSMISSION_POSTSYNAPTIC	0.000316872	0.0102916	0.498493	-0.547388	-1.72286	97
2696	GOBP_MULTI_MULTICELLULAR_ORGANISM_PROCESS	0.000316602	0.0102916	0.498493	-0.495268	-1.65397	153
3922	GOBP_PERICARDIUM_MORPHOGENESIS	0.000315672	0.0102916	0.498493	-0.905677	-1.80943	9
4505	GOBP_POSITIVE_REGULATION_OF_KINASE_ACTIVITY	0.000320152	0.0102916	0.498493	-0.405795	-1.48083	409
6323	GOBP_REGULATION_OF_POSTSYNAPTIC_MEMBRANE_POTENTIAL	0.000319768	0.0102916	0.498493	-0.533562	-1.71572	112
6970	GOBP_RETINOL_METABOLIC_PROCESS	0.000320736	0.0102916	0.498493	-0.752861	-1.87348	25
7113	GOBP_SEROTONIN_BIOSYNTHETIC_PROCESS	0.000317558	0.0102916	0.498493	-0.949838	-1.73091	6
7787	GOCC_ACTOMYOSIN	0.000327821	0.0104745	0.498493	-0.571908	-1.77489	88
4493	GOBP_POSITIVE_REGULATION_OF_ION_TRANSMEMBRANE_TRANSPORT	0.000332979	0.0106075	0.498493	-0.465956	-1.59192	194
2768	GOBP_NCRNA_METABOLIC_PROCESS	0.000344858	0.0109531	0.498493	0.319187	1.35463	514
1219	GOBP_DNA_TEMPLATED_DNA_REPLICATION_MAINTENANCE_OF_FIDELITY	0.000358506	0.011319	0.498493	0.621067	1.88498	40
3800	GOBP_ORGANIC_HYDROXY_COMPOUND_TRANSPORT	0.000358042	0.011319	0.498493	-0.440706	-1.54515	258
129	GOBP_AMINE_BIOSYNTHETIC_PROCESS	0.000370114	0.0115484	0.498493	-0.70197	-1.8831	37
5029	GOBP_POTASSIUM_ION_EXPORT_ACROSS_PLASMA_MEMBRANE	0.000369046	0.0115484	0.498493	-0.788781	-1.80805	18
7519	GOBP_TRIGLYCERIDE_METABOLIC_PROCESS	0.000370036	0.0115484	0.498493	0.471952	1.68205	104
8426	GOCC_NUCLEAR_PORE	0.000367943	0.0115484	0.498493	0.521255	1.74921	76
6364	GOBP_REGULATION_OF_PROTEIN_KINASE_ACTIVITY	0.000373768	0.0116283	0.498493	-0.384254	-1.42332	562
4819	GOBP_POSITIVE_REGULATION_OF_RIG_I_SIGNALING_PATHWAY	0.000375735	0.0116554	0.498493	0.862581	1.81343	10
86	GOBP_ADHERENS_JUNCTION_ORGANIZATION	0.000389843	0.0120579	0.498493	-0.644339	-1.82633	48
5575	GOBP_REGULATION_OF_CELLULAR_COMPONENT_BIOGENESIS	0.000397384	0.0122461	0.498493	-0.357753	-1.34814	905
10280	GOMF_SINGLE_STRANDED_DNA_BINDING	0.000398229	0.0122461	0.498493	0.470014	1.67514	104
4754	GOBP_POSITIVE_REGULATION_OF_PROTEIN_KINASE_ACTIVITY	0.000403121	0.0123608	0.498493	-0.410937	-1.47528	338
2108	GOBP_ISOPRENOID_TRANSPORT	0.000412041	0.012598	0.498493	-0.983869	-1.56039	3
1903	GOBP_HOMEOSTASIS_OF_NUMBER_OF_CELLS	0.000413943	0.0126199	0.498493	-0.410715	-1.47449	338
2921	GOBP_NEGATIVE_REGULATION_OF_CHONDROCYTE_DIFFERENTIATION	0.000418453	0.0126847	0.498493	-0.752974	-1.83551	23
8166	GOCC_GLYCOPROTEIN_COMPLEX	0.000418453	0.0126847	0.498493	-0.74766	-1.86053	25
6185	GOBP_REGULATION_OF_NEURAL_PRECURSOR_CELL_PROLIFERATION	0.000423944	0.0128147	0.498493	-0.514689	-1.65595	114
8109	GOCC_EXOCYTIC_VESICLE	0.000430491	0.0129757	0.498493	-0.449589	-1.56689	245
4194	GOBP_POSITIVE_REGULATION_OF_CELL_DEVELOPMENT	0.000432509	0.0129997	0.498493	-0.419998	-1.5133	357
4266	GOBP_POSITIVE_REGULATION_OF_CYTOSOLIC_CALCIUM_ION_CONCENTRATION	0.000437363	0.0131086	0.498493	-0.462793	-1.58964	213
6515	GOBP_REGULATION_OF_SPINDLE_CHECKPOINT	0.000448949	0.0133586	0.498493	0.7373	1.90631	21
7089	GOBP_SENSORY_PERCEPTION	0.00044947	0.0133586	0.498493	-0.382346	-1.41003	530
9956	GOMF_PENTOSYLTRANSFERASE_ACTIVITY	0.00044849	0.0133586	0.498493	0.604981	1.84884	42
1538	GOBP_FAT_CELL_DIFFERENTIATION	0.000451604	0.0133846	0.498493	-0.443521	-1.54766	246
1360	GOBP_ENDOTHELIAL_CELL_PROLIFERATION	0.000456149	0.0134073	0.498493	-0.493342	-1.65261	158
3770	GOBP_ONE_CARBON_COMPOUND_TRANSPORT	0.000456152	0.0134073	0.498493	-0.801589	-1.79487	16
5534	GOBP_REGULATION_OF_CAMP_MEDIATED_SIGNALING	0.000453937	0.0134073	0.498493	-0.656879	-1.82431	43
5495	GOBP_REGULATION_OF_BLOOD_VESSEL_ENDOTHELIAL_CELL_MIGRATION	0.000457506	0.0134101	0.498493	-0.535606	-1.66611	92
208	GOBP_ANTIGEN_PROCESSING_AND_PRESENTATION_OF_PEPTIDE_ANTIGEN	0.000459311	0.013426	0.498493	0.58097	1.83263	47
8293	GOCC_LOW_DENSITY_LIPOPROTEIN_PARTICLE	0.000467554	0.0136295	0.498493	0.820649	1.84624	12
7018	GOBP_RNA_EXPORT_FROM_NUCLEUS	0.000476603	0.0138554	0.498493	0.530861	1.77401	67
3942	GOBP_PHARYNGEAL_SYSTEM_DEVELOPMENT	0.000483115	0.0140064	0.498493	-0.723525	-1.88695	30
6392	GOBP_REGULATION_OF_PROTEIN_SECRETION	0.000485559	0.014039	0.498493	-0.421753	-1.49248	275
6624	GOBP_REGULATION_OF_TRANSMEMBRANE_TRANSPORT	0.000487272	0.0140503	0.498493	-0.381387	-1.41153	587
8049	GOCC_DNA_PACKAGING_COMPLEX	0.000497767	0.0143142	0.477271	0.509018	1.70882	78
4982	GOBP_POSITIVE_REGULATION_OF_VASCULATURE_DEVELOPMENT	0.000501763	0.0143471	0.477271	-0.481806	-1.62217	164
6474	GOBP_REGULATION_OF_SERINE_TYPE_PEPTIDASE_ACTIVITY	0.000500325	0.0143471	0.477271	-0.951912	-1.66364	5
9446	GOMF_HELICASE_ACTIVITY	0.000502958	0.0143471	0.477271	0.429935	1.59621	141
1798	GOBP_HEART_DEVELOPMENT	0.000512724	0.0145866	0.477271	-0.376084	-1.39466	598
8664	GOCC_SMALL_NUCLEAR_RIBONUCLEOPROTEIN_COMPLEX	0.000517557	0.0146848	0.477271	0.535726	1.76886	61
3015	GOBP_NEGATIVE_REGULATION_OF_FAT_CELL_DIFFERENTIATION	0.000524679	0.0148079	0.477271	-0.621274	-1.79987	55
6551	GOBP_REGULATION_OF_SYNAPTIC_TRANSMISSION_GLUTAMATERGIC	0.000524271	0.0148079	0.477271	-0.563641	-1.73828	81
8230	GOCC_INTERCELLULAR_CANALICULUS	0.000526647	0.0148241	0.477271	-0.895416	-1.78893	9
1414	GOBP_EPITHELIUM_DEVELOPMENT	0.000535674	0.0150385	0.477271	-0.341297	-1.29452	1211
5175	GOBP_PROTEIN_LOCALIZATION_TO_CHROMOSOME	0.000541197	0.0151535	0.477271	0.492925	1.70409	87
1802	GOBP_HEART_MORPHOGENESIS	0.00055062	0.0153366	0.477271	-0.423005	-1.48996	266
5879	GOBP_REGULATION_OF_G_PROTEIN_COUPLED_RECEPTOR_SIGNALING_PATHWAY	0.000549305	0.0153366	0.477271	-0.503579	-1.63847	130
6048	GOBP_REGULATION_OF_MACROPHAGE_DIFFERENTIATION	0.00057501	0.0159742	0.477271	-0.750019	-1.7942	22
9409	GOMF_GROWTH_FACTOR_BINDING	0.00058118	0.0161035	0.477271	-0.503033	-1.65642	139
4090	GOBP_POSITIVE_REGULATION_OF_ANIMAL_ORGAN_MORPHOGENESIS	0.000590616	0.0163225	0.477271	-0.662774	-1.81762	41
5441	GOBP_REGULATION_OF_ANGIOTENSIN_LEVELS_IN_BLOOD	0.0006085	0.0167732	0.477271	-0.947161	-1.65534	5
9205	GOMF_DAMAGED_DNA_BINDING	0.000610179	0.016776	0.477271	0.55674	1.79124	53
1909	GOBP_HOMOLOGOUS_RECOMBINATION	0.000612653	0.0168006	0.477271	0.574772	1.81176	48
1788	GOBP_HABITUATION	0.000620399	0.0169693	0.477271	-0.942545	-1.71762	6
4596	GOBP_POSITIVE_REGULATION_OF_MITOTIC_CELL_CYCLE_SPINDLE_ASSEMBLY_CHECKPOINT	0.000624795	0.0170457	0.477271	0.815864	1.83547	12
5690	GOBP_REGULATION_OF_CYTOSOLIC_CALCIUM_ION_CONCENTRATION	0.000628785	0.0171107	0.477271	-0.634737	-1.8095	52
3813	GOBP_OSSIFICATION	0.000638759	0.0173378	0.477271	-0.405335	-1.47078	379
3555	GOBP_NEUROEPITHELIAL_CELL_DIFFERENTIATION	0.000657478	0.0177552	0.477271	-0.659246	-1.80795	41
5731	GOBP_REGULATION_OF_DNA_REPAIR	0.000655965	0.0177552	0.477271	0.40127	1.52913	182
2715	GOBP_MYD88_DEPENDENT_TOLL_LIKE_RECEPTOR_SIGNALING_PATHWAY	0.000660365	0.0177881	0.477271	0.726284	1.85365	20
10259	GOMF_SERINE_HYDROLASE_ACTIVITY	0.000668632	0.0179653	0.477271	-0.472226	-1.60029	174
1034	GOBP_CYTOSKELETON_ORGANIZATION	0.00068383	0.0182355	0.477271	-0.335981	-1.27672	1309
5527	GOBP_REGULATION_OF_CALCIUM_ION_TRANSMEMBRANE_TRANSPORT	0.000683742	0.0182355	0.477271	-0.468806	-1.59396	185
8278	GOCC_LAMELLIPODIUM	0.000682992	0.0182355	0.477271	-0.4769	-1.60057	161
4143	GOBP_POSITIVE_REGULATION_OF_CALCIUM_ION_TRANSPORT	0.000686348	0.0182569	0.477271	-0.479496	-1.58151	140
2892	GOBP_NEGATIVE_REGULATION_OF_CELL_DIFFERENTIATION	0.000705619	0.0187227	0.477271	-0.367183	-1.368	663
4124	GOBP_POSITIVE_REGULATION_OF_BLOOD_VESSEL_ENDOTHELIAL_CELL_MIGRATION	0.000710277	0.0187994	0.477271	-0.614788	-1.78108	55
8865	GOMF_ACTIN_BINDING	0.000712133	0.0188017	0.477271	-0.397306	-1.45172	415
5689	GOBP_REGULATION_OF_CYTOSKELETON_ORGANIZATION	0.00071609	0.0188594	0.477271	-0.380945	-1.40128	499
2587	GOBP_MITOTIC_CELL_CYCLE_PHASE_TRANSITION	0.000720491	0.0189285	0.477271	0.323068	1.33568	413
5579	GOBP_REGULATION_OF_CELLULAR_LOCALIZATION	0.000727087	0.0190547	0.477271	-0.34562	-1.3038	957
7906	GOCC_CELL_SUBSTRATE_JUNCTION	0.000734162	0.0191928	0.477271	-0.471962	-1.59941	177
9141	GOMF_COLLAGEN_BINDING	0.000741642	0.0193409	0.477271	-0.580778	-1.73388	69
4326	GOBP_POSITIVE_REGULATION_OF_EPITHELIAL_CELL_MIGRATION	0.000743523	0.0193425	0.477271	-0.488791	-1.63461	152
149	GOBP_AMMONIUM_ION_METABOLIC_PROCESS	0.000750193	0.0193739	0.477271	-0.730767	-1.8185	25
355	GOBP_BLOOD_VESSEL_ENDOTHELIAL_CELL_MIGRATION	0.00074855	0.0193739	0.477271	-0.502377	-1.61602	119
7659	GOBP_VASCULAR_PROCESS_IN_CIRCULATORY_SYSTEM	0.000749256	0.0193739	0.477271	-0.455404	-1.56968	221
2490	GOBP_METANEPHROS_DEVELOPMENT	0.00076176	0.0195424	0.477271	-0.557119	-1.73285	89
2712	GOBP_MUSCLE_SYSTEM_PROCESS	0.000762227	0.0195424	0.477271	-0.394908	-1.43996	407
8511	GOCC_PLATELET_ALPHA_GRANULE	0.000760246	0.0195424	0.477271	-0.767456	-1.78938	20
3607	GOBP_NEUROTRANSMITTER_TRANSPORT	0.000766887	0.0196146	0.477271	-0.44206	-1.53731	238
4806	GOBP_POSITIVE_REGULATION_OF_RESPONSE_TO_BIOTIC_STIMULUS	0.000779027	0.0198773	0.477271	0.408976	1.55154	165
6851	GOBP_RESPONSE_TO_KETONE	0.000791253	0.0200929	0.477271	-0.501123	-1.61945	124
6886	GOBP_RESPONSE_TO_ORGANIC_CYCLIC_COMPOUND	0.000790868	0.0200929	0.477271	-0.36689	-1.36426	654
9942	GOMF_OXYGEN_CARRIER_ACTIVITY	0.000798929	0.0202395	0.477271	-0.938082	-1.70949	6
87	GOBP_ADHESION_OF_SYMBIONT_TO_HOST	0.000800913	0.0202416	0.477271	0.770571	1.81263	15
6164	GOBP_REGULATION_OF_MYELOID_LEUKOCYTE_DIFFERENTIATION	0.000803652	0.0202627	0.477271	-0.493908	-1.60737	129
4554	GOBP_POSITIVE_REGULATION_OF_MAPK_CASCADE	0.00081783	0.0205714	0.477271	-0.381742	-1.40405	494
9321	GOMF_EXTRACELLULAR_MATRIX_STRUCTURAL_CONSTITUENT	0.000821665	0.0206191	0.477271	-0.490308	-1.63092	146
5439	GOBP_REGULATION_OF_ANATOMICAL_STRUCTURE_SIZE	0.000832987	0.0207564	0.477271	-0.379463	-1.39939	523
8440	GOCC_NUCLEOLUS	0.000830338	0.0207564	0.477271	0.286774	1.24644	801
9436	GOMF_G_PROTEIN_COUPLED_RECEPTOR_BINDING	0.000831935	0.0207564	0.477271	-0.424257	-1.50083	278
9408	GOMF_GROWTH_FACTOR_ACTIVITY	0.000836362	0.0207918	0.477271	-0.50076	-1.63867	135
4235	GOBP_POSITIVE_REGULATION_OF_CHROMOSOME_SEGREGATION	0.000846641	0.0209709	0.477271	0.647439	1.81706	29
8114	GOCC_EXTERNAL_SIDE_OF_PLASMA_MEMBRANE	0.000847509	0.0209709	0.477271	-0.398342	-1.45179	406
7548	GOBP_TRYPTOPHAN_METABOLIC_PROCESS	0.000856545	0.0211453	0.477271	0.845728	1.778	10
7981	GOCC_COP9_SIGNALOSOME	0.00087636	0.0215844	0.477271	-0.68729	-1.80848	31
1210	GOBP_DNA_REPLICATION_CHECKPOINT_SIGNALING	0.00088303	0.0216985	0.477271	0.78341	1.84327	14
4158	GOBP_POSITIVE_REGULATION_OF_CATALYTIC_ACTIVITY	0.000893857	0.0219139	0.477271	-0.341664	-1.29232	1014
1108	GOBP_DETECTION_OF_EXTERNAL_STIMULUS	0.000897435	0.0219511	0.477271	-0.496699	-1.61609	130
6835	GOBP_RESPONSE_TO_INTERFERON_GAMMA	0.000904438	0.0220716	0.477271	0.432782	1.59109	127
9424	GOMF_G_PROTEIN_BETA_GAMMA_SUBUNIT_COMPLEX_BINDING	0.000916807	0.0223223	0.477271	-0.739572	-1.80284	23
5397	GOBP_REGULATED_EXOCYTOSIS	0.000937001	0.0227237	0.477271	-0.432012	-1.52337	267
8673	GOCC_SM_LIKE_PROTEIN_FAMILY_COMPLEX	0.000937567	0.0227237	0.477271	0.512537	1.72204	72
6903	GOBP_RESPONSE_TO_PROTOZOAN	0.000945534	0.0228647	0.477271	0.61532	1.84209	37
4159	GOBP_POSITIVE_REGULATION_OF_CATECHOLAMINE_METABOLIC_PROCESS	0.000951736	0.0229625	0.477271	-0.908646	-1.69426	7
1429	GOBP_ERYTHROCYTE_DEVELOPMENT	0.000971695	0.023391	0.477271	-0.637503	-1.7705	43
6124	GOBP_REGULATION_OF_MITOTIC_CELL_CYCLE_PHASE_TRANSITION	0.000975504	0.0234297	0.477271	0.343796	1.39031	309
4925	GOBP_POSITIVE_REGULATION_OF_TRANSFERASE_ACTIVITY	0.000981174	0.0235128	0.45506	-0.38041	-1.39985	490
7990	GOCC_CORTICAL_CYTOSKELETON	0.000985597	0.0235657	0.45506	-0.505367	-1.62436	115
6561	GOBP_REGULATION_OF_SYSTEMIC_ARTERIAL_BLOOD_PRESSURE	0.000995654	0.0237528	0.45506	-0.520296	-1.66447	109
1981	GOBP_INHIBITORY_POSTSYNAPTIC_POTENTIAL	0.00100227	0.023821	0.45506	-0.746234	-1.76664	21
7116	GOBP_SEROTONIN_TRANSPORT	0.00100299	0.023821	0.45506	-0.727932	-1.83805	26
5172	GOBP_PROTEIN_LOCALIZATION_TO_CELL_PERIPHERY	0.00101086	0.0239394	0.45506	-0.411725	-1.48287	356
8942	GOMF_ANION_SODIUM_SYMPORTER_ACTIVITY	0.00101247	0.0239394	0.45506	-0.788038	-1.76453	16
3472	GOBP_NEGATIVE_REGULATION_OF_TRANSPORT	0.00103897	0.0244867	0.45506	-0.380173	-1.39694	482
7000	GOBP_RIBOSOMAL_LARGE_SUBUNIT_BIOGENESIS	0.00104023	0.0244867	0.45506	0.520351	1.71809	61
4335	GOBP_POSITIVE_REGULATION_OF_ERK1_AND_ERK2_CASCADE	0.00104558	0.0245584	0.45506	-0.442038	-1.51839	214
3202	GOBP_NEGATIVE_REGULATION_OF_MITOTIC_CELL_CYCLE_PHASE_TRANSITION	0.00105068	0.0245699	0.45506	0.407231	1.54435	156
4993	GOBP_POSITIVE_REGULATION_OF_VOLTAGE_GATED_CALCIUM_CHANNEL_ACTIVITY	0.00104889	0.0245699	0.45506	-0.744708	-1.76303	21
5602	GOBP_REGULATION_OF_CELL_CHEMOTAXIS_TO_FIBROBLAST_GROWTH_FACTOR	0.00105651	0.0246519	0.45506	-0.906399	-1.69007	7
6820	GOBP_RESPONSE_TO_HORMONE	0.00106192	0.0247238	0.45506	-0.369228	-1.37179	636
9451	GOMF_HEPARAN_SULFATE_GLUCOSAMINE_3_SULFOTRANSFERASE_1_ACTIVITY	0.00107397	0.02495	0.45506	-0.905683	-1.68873	7
5446	GOBP_REGULATION_OF_ANION_TRANSPORT	0.00107741	0.0249753	0.45506	-0.514864	-1.6406	106
475	GOBP_CARDIAC_CHAMBER_MORPHOGENESIS	0.00110496	0.0255028	0.45506	-0.490434	-1.61494	139
5874	GOBP_REGULATION_OF_GTPASE_ACTIVITY	0.00110386	0.0255028	0.45506	-0.40556	-1.45582	335
736	GOBP_CELL_CYCLE_DNA_REPLICATION	0.00111698	0.0257243	0.45506	0.645054	1.8367	31
8238	GOCC_INTRACELLULAR_CANALICULUS	0.00113242	0.0260236	0.45506	-0.9356	-1.63514	5
3815	GOBP_OSTEOBLAST_DIFFERENTIATION	0.00114452	0.0261886	0.45506	-0.450478	-1.54083	195
9045	GOMF_CALCIUM_ION_TRANSMEMBRANE_TRANSPORTER_ACTIVITY	0.00114277	0.0261886	0.45506	-0.497211	-1.61487	128
8777	GOCC_U2_TYPE_SPLICEOSOMAL_COMPLEX	0.00115813	0.0264432	0.45506	0.480749	1.63101	82
2334	GOBP_MALATE_METABOLIC_PROCESS	0.00117875	0.0268563	0.45506	-0.903781	-1.68519	7
7445	GOBP_TOLL_LIKE_RECEPTOR_4_SIGNALING_PATHWAY	0.00118152	0.0268618	0.45506	0.623339	1.86916	38
5599	GOBP_REGULATION_OF_CELL_CELL_ADHESION	0.0011912	0.0270243	0.45506	-0.385581	-1.41394	458
10334	GOMF_STRUCTURAL_CONSTITUENT_OF_CYTOSKELETON	0.00119922	0.0271484	0.45506	-0.565726	-1.68404	68
7408	GOBP_TETRAPYRROLE_BIOSYNTHETIC_PROCESS	0.00120592	0.0272421	0.45506	-0.679086	-1.78689	31
7476	GOBP_TRANSCRIPTION_INITIATION_AT_RNA_POLYMERASE_II_PROMOTER	0.00121406	0.0273677	0.45506	0.476785	1.63778	86
4516	GOBP_POSITIVE_REGULATION_OF_LEUKOCYTE_PROLIFERATION	0.00122445	0.0274318	0.45506	-0.479263	-1.60544	158
6198	GOBP_REGULATION_OF_NEUROTRANSMITTER_LEVELS	0.00122463	0.0274318	0.45506	-0.431798	-1.5101	249
9438	GOMF_G_PROTEIN_COUPLED_SEROTONIN_RECEPTOR_BINDING	0.00122301	0.0274318	0.45506	-0.934384	-1.63301	5
2598	GOBP_MITOTIC_INTRA_S_DNA_DAMAGE_CHECKPOINT_SIGNALING	0.00123458	0.0275556	0.45506	0.754326	1.81999	16
7843	GOCC_AZUROPHIL_GRANULE	0.00123534	0.0275556	0.45506	0.798828	1.79715	12
1410	GOBP_EPITHELIAL_TO_MESENCHYMAL_TRANSITION	0.00125411	0.0279158	0.45506	-0.475165	-1.58378	149
5625	GOBP_REGULATION_OF_CELL_MORPHOGENESIS	0.00125836	0.0279518	0.45506	-0.405233	-1.45146	317
540	GOBP_CD8_POSITIVE_ALPHA_BETA_T_CELL_PROLIFERATION	0.00126615	0.0280664	0.45506	0.935699	1.6749	5
6609	GOBP_REGULATION_OF_TRANSFERASE_ACTIVITY	0.00127524	0.028209	0.45506	-0.354496	-1.32871	770
5735	GOBP_REGULATION_OF_DNA_TEMPLATED_DNA_REPLICATION	0.00129782	0.028649	0.45506	0.56097	1.79191	51
4173	GOBP_POSITIVE_REGULATION_OF_CELLULAR_COMPONENT_BIOGENESIS	0.00130427	0.0287317	0.45506	-0.380081	-1.39858	489
4545	GOBP_POSITIVE_REGULATION_OF_MACROPHAGE_DIFFERENTIATION	0.00131541	0.0289173	0.45506	-0.779564	-1.74555	16
5732	GOBP_REGULATION_OF_DNA_REPLICATION	0.00131963	0.0289502	0.45506	0.424565	1.57041	131
4691	GOBP_POSITIVE_REGULATION_OF_OSTEOBLAST_DIFFERENTIATION	0.00132695	0.0290509	0.45506	-0.563292	-1.67679	68
9959	GOMF_PEPTIDASE_ACTIVITY	0.00133093	0.0290782	0.45506	-0.36963	-1.36518	535
4453	GOBP_POSITIVE_REGULATION_OF_IMMUNE_RESPONSE	0.00133954	0.0292063	0.45506	0.313188	1.30503	462
7884	GOCC_CATALYTIC_STEP_2_SPLICEOSOME	0.00134287	0.029219	0.45506	0.478627	1.6238	82
1675	GOBP_GLOMERULUS_DEVELOPMENT	0.00135115	0.0293392	0.45506	-0.575485	-1.70164	65
2889	GOBP_NEGATIVE_REGULATION_OF_CELL_CYCLE_PROCESS	0.00138341	0.0299786	0.45506	0.3554	1.41194	264
1261	GOBP_EATING_BEHAVIOR	0.00138932	0.0300454	0.45506	-0.594395	-1.70437	53
562	GOBP_CELLULAR_GLUCURONIDATION	0.00140403	0.0302417	0.45506	0.955959	1.60282	4
1052	GOBP_DEFENSE_RESPONSE_TO_GRAM_POSITIVE_BACTERIUM	0.00140408	0.0302417	0.45506	0.458322	1.60694	96
1024	GOBP_CYTOPLASMIC_PATTERN_RECOGNITION_RECEPTOR_SIGNALING_PATHWAY_IN_RESPONSE_TO_VIRUS	0.00142223	0.0305091	0.45506	0.674132	1.8547	27
4492	GOBP_POSITIVE_REGULATION_OF_INTRINSIC_APOPTOTIC_SIGNALING_PATHWAY_IN_RESPONSE_TO_DNA_DAMAGE	0.00142005	0.0305091	0.45506	-0.861177	-1.77154	10
2394	GOBP_MEIOSIS_I_CELL_CYCLE_PROCESS	0.00143005	0.0306151	0.45506	0.449524	1.61261	108
9444	GOMF_HAPTOGLOBIN_BINDING	0.00143306	0.030618	0.45506	-0.976783	-1.54915	3
6091	GOBP_REGULATION_OF_METAL_ION_TRANSPORT	0.00143958	0.0306957	0.45506	-0.390271	-1.4259	429
4831	GOBP_POSITIVE_REGULATION_OF_SECRETION	0.00144331	0.0307137	0.45506	-0.392768	-1.41718	364
6179	GOBP_REGULATION_OF_NATURAL_KILLER_CELL_MEDIATED_IMMUNITY	0.00145418	0.0308833	0.45506	-0.627486	-1.7884	50
5403	GOBP_REGULATION_OF_ACTIN_FILAMENT_BASED_PROCESS	0.00147456	0.0312537	0.45506	-0.392065	-1.42374	383
182	GOBP_ANIMAL_ORGAN_MORPHOGENESIS	0.00150676	0.0317268	0.45506	-0.339599	-1.28407	1079
284	GOBP_ATTACHMENT_OF_SPINDLE_MICROTUBULES_TO_KINETOCHORE	0.00150881	0.0317268	0.45506	0.603325	1.80618	37
1107	GOBP_DETECTION_OF_EXTERNAL_BIOTIC_STIMULUS	0.0015057	0.0317268	0.45506	0.690702	1.80738	22
5560	GOBP_REGULATION_OF_CATION_TRANSMEMBRANE_TRANSPORT	0.00150311	0.0317268	0.45506	-0.393238	-1.42829	388
6155	GOBP_REGULATION_OF_MUSCLE_CONTRACTION	0.00152113	0.0319227	0.45506	-0.470234	-1.57764	160
7486	GOBP_TRANSFORMING_GROWTH_FACTOR_BETA_ACTIVATION	0.00152522	0.0319456	0.45506	-0.868462	-1.73508	9
8187	GOCC_GTPASE_COMPLEX	0.00154557	0.0323081	0.45506	-0.646156	-1.74327	38
9952	GOMF_PASSIVE_TRANSMEMBRANE_TRANSPORTER_ACTIVITY	0.00157249	0.0328064	0.45506	-0.381218	-1.39838	451
2362	GOBP_MAPK_CASCADE	0.00157687	0.0328335	0.45506	-0.352933	-1.32203	756
9556	GOMF_INTRAMOLECULAR_OXIDOREDUCTASE_ACTIVITY_TRANSPOSING_C_C_BONDS	0.00158646	0.0329687	0.45506	-0.774539	-1.7343	16
6204	GOBP_REGULATION_OF_NEUTROPHIL_ACTIVATION	0.00161848	0.0335684	0.45506	0.773985	1.78319	13
1016	GOBP_CYTOKINE_MEDIATED_SIGNALING_PATHWAY	0.00162912	0.0337234	0.45506	0.318408	1.29876	371
2365	GOBP_MAST_CELL_ACTIVATION_INVOLVED_IN_IMMUNE_RESPONSE	0.00164524	0.033991	0.45506	-0.590267	-1.71817	57
6309	GOBP_REGULATION_OF_PLATELET_AGGREGATION	0.0016876	0.0347985	0.45506	-0.680622	-1.75679	29
855	GOBP_CHEMOREPULSION_OF_AXON	0.00169409	0.0348648	0.45506	-0.929391	-1.62428	5
4184	GOBP_POSITIVE_REGULATION_OF_CELL_CELL_ADHESION	0.00170491	0.0350198	0.45506	-0.413441	-1.46635	294
202	GOBP_ANTIGEN_PROCESSING_AND_PRESENTATION	0.00172257	0.0353144	0.45506	0.474724	1.655	90
520	GOBP_CATECHOLAMINE_SECRETION	0.00173544	0.0355097	0.45506	-0.556038	-1.66928	71
444	GOBP_CAMP_MEDIATED_SIGNALING	0.00174613	0.0356239	0.45506	-0.576004	-1.70081	61
1244	GOBP_DOUBLE_STRAND_BREAK_REPAIR_VIA_BREAK_INDUCED_REPLICATION	0.00174772	0.0356239	0.45506	0.80681	1.76528	11
5922	GOBP_REGULATION_OF_HORMONE_LEVELS	0.00175842	0.0357737	0.45506	-0.372562	-1.36961	506
4723	GOBP_POSITIVE_REGULATION_OF_PLASMA_MEMBRANE_BOUNDED_CELL_PROJECTION_ASSEMBLY	0.00177492	0.0360404	0.45506	-0.506933	-1.60772	103
1232	GOBP_DOPAMINE_SECRETION	0.0017837	0.0361497	0.45506	-0.627443	-1.73589	42
3119	GOBP_NEGATIVE_REGULATION_OF_ION_TRANSPORT	0.00178748	0.0361573	0.45506	-0.457004	-1.54871	177
1291	GOBP_EMBRYONIC_MORPHOGENESIS	0.00180994	0.0365422	0.45506	-0.356623	-1.32136	631
8534	GOCC_POSTSYNAPTIC_SPECIALIZATION_MEMBRANE	0.00185564	0.0373939	0.45506	-0.477286	-1.55547	133
7380	GOBP_TAXIS	0.00188383	0.0378903	0.45506	-0.37103	-1.37324	564
7933	GOCC_CHROMOSOME_TELOMERIC_REGION	0.00188754	0.0378933	0.45506	0.455201	1.61447	101
10201	GOMF_RETINOL_BINDING	0.00189293	0.0379298	0.45506	-0.805188	-1.7646	14
2711	GOBP_MUSCLE_STRUCTURE_DEVELOPMENT	0.00189892	0.0379784	0.45506	-0.35392	-1.31823	660
72	GOBP_ADENOHYPOPHYSIS_DEVELOPMENT	0.00190676	0.0380637	0.45506	-0.769136	-1.7222	16
1295	GOBP_EMBRYONIC_PATTERN_SPECIFICATION	0.001929	0.0384354	0.45506	-0.53777	-1.6585	81
6718	GOBP_RENAL_SYSTEM_VASCULATURE_DEVELOPMENT	0.00195159	0.0387406	0.45506	-0.688528	-1.75743	28
10283	GOMF_SINGLE_STRANDED_DNA_HELICASE_ACTIVITY	0.00195138	0.0387406	0.45506	0.678566	1.79915	23
521	GOBP_CATECHOLAMINE_TRANSPORT	0.00197331	0.0390987	0.431708	-0.525477	-1.62959	87
2036	GOBP_INTERLEUKIN_27_MEDIATED_SIGNALING_PATHWAY	0.00198756	0.039235	0.431708	0.928315	1.66169	5
6187	GOBP_REGULATION_OF_NEUROGENESIS	0.00198718	0.039235	0.431708	-0.377962	-1.3827	435
1110	GOBP_DETECTION_OF_LIGHT_STIMULUS_INVOLVED_IN_SENSORY_PERCEPTION	0.00199495	0.0392504	0.431708	-0.717373	-1.74873	23
6518	GOBP_REGULATION_OF_SPROUTING_ANGIOGENESIS	0.00199572	0.0392504	0.431708	-0.639231	-1.72459	38
7400	GOBP_TERPENOID_CATABOLIC_PROCESS	0.0020078	0.0393426	0.431708	0.898231	1.69458	6
8121	GOCC_EXTRINSIC_COMPONENT_OF_MEMBRANE	0.00200674	0.0393426	0.431708	-0.405113	-1.44673	311
7221	GOBP_SOMITE_DEVELOPMENT	0.00201288	0.0393695	0.431708	-0.521369	-1.63823	96
4626	GOBP_POSITIVE_REGULATION_OF_MYELOID_LEUKOCYTE_DIFFERENTIATION	0.00201762	0.0393898	0.431708	-0.554666	-1.64992	66
3096	GOBP_NEGATIVE_REGULATION_OF_INTERFERON_GAMMA_PRODUCTION	0.00202876	0.0395349	0.431708	-0.661598	-1.77479	37
8565	GOCC_PROTEIN_COMPLEX_INVOLVED_IN_CELL_ADHESION	0.00203299	0.0395447	0.431708	-0.590736	-1.7114	55
3625	GOBP_NEUTROPHIL_MEDIATED_IMMUNITY	0.0020439	0.0396845	0.431708	0.605871	1.81678	38
765	GOBP_CELL_MIGRATION_INVOLVED_IN_GASTRULATION	0.00212117	0.0410817	0.431708	-0.769157	-1.74159	17
1953	GOBP_IMMUNE_RESPONSE_REGULATING_SIGNALING_PATHWAY	0.00212394	0.0410817	0.431708	0.331586	1.35564	347
7623	GOBP_UREA_TRANSPORT	0.00212744	0.0410817	0.431708	-0.859399	-1.71697	9
7212	GOBP_SOMATIC_DIVERSIFICATION_OF_IMMUNE_RECEPTORS_VIA_SOMATIC_MUTATION	0.00214275	0.0413024	0.431708	0.741037	1.74316	15
1422	GOBP_ERBB3_SIGNALING_PATHWAY	0.00215791	0.0414444	0.431708	0.896305	1.69095	6
10198	GOMF_RETINOIC_ACID_4_HYDROXYLASE_ACTIVITY	0.00215791	0.0414444	0.431708	0.89657	1.69145	6
1555	GOBP_FEMALE_PREGNANCY	0.00216861	0.0415747	0.431708	-0.481462	-1.55591	124
1426	GOBP_ERK1_AND_ERK2_CASCADE	0.00218527	0.0418189	0.431708	-0.401147	-1.43815	329
7343	GOBP_SYNAPSE_ASSEMBLY	0.00219422	0.0418395	0.431708	-0.446447	-1.51039	181
8256	GOCC_INTRINSIC_COMPONENT_OF_POSTSYNAPTIC_MEMBRANE	0.00219133	0.0418395	0.431708	-0.44965	-1.52378	174
1419	GOBP_ERBB2_ERBB3_SIGNALING_PATHWAY	0.00221046	0.0420739	0.431708	0.926353	1.65817	5
2492	GOBP_METAPHASE_PLATE_CONGRESSION	0.00224655	0.0425326	0.431708	0.503166	1.66135	61
2916	GOBP_NEGATIVE_REGULATION_OF_CHEMOKINE_PRODUCTION	0.00224181	0.0425326	0.431708	0.692848	1.76831	20
6501	GOBP_REGULATION_OF_SMOOTH_MUSCLE_CONTRACTION	0.00224336	0.0425326	0.431708	-0.552926	-1.64475	66
8635	GOCC_SARCOMERE	0.00231231	0.0436997	0.431708	-0.443876	-1.51227	190
3021	GOBP_NEGATIVE_REGULATION_OF_FIBROBLAST_GROWTH_FACTOR_RECEPTOR_SIGNALING_PATHWAY	0.00232308	0.043801	0.431708	-0.743404	-1.72884	19
4192	GOBP_POSITIVE_REGULATION_OF_CELL_CYCLE_PROCESS	0.0023259	0.043801	0.431708	0.359137	1.41516	236
4642	GOBP_POSITIVE_REGULATION_OF_NEUROBLAST_PROLIFERATION	0.00233343	0.0438653	0.431708	-0.664417	-1.74829	31
8536	GOCC_POTASSIUM_CHANNEL_COMPLEX	0.00234397	0.0439856	0.431708	-0.517037	-1.60688	90
7024	GOBP_RNA_MODIFICATION	0.0023705	0.0444052	0.431708	0.411974	1.51926	128
4768	GOBP_POSITIVE_REGULATION_OF_PROTEIN_LOCALIZATION_TO_SYNAPSE	0.00238527	0.044525	0.431708	-0.922866	-1.61288	5
8724	GOCC_TERMINAL_BOUTON	0.00238157	0.044525	0.431708	-0.529058	-1.63967	86
2321	GOBP_MAINTENANCE_OF_LOCATION_IN_CELL	0.0023926	0.0445836	0.431708	-0.439415	-1.50514	204
8484	GOCC_PHAGOCYTIC_VESICLE_MEMBRANE	0.00239862	0.0446176	0.431708	0.689861	1.76069	20
4487	GOBP_POSITIVE_REGULATION_OF_INTRACELLULAR_SIGNAL_TRANSDUCTION	0.00243654	0.0452439	0.431708	-0.346905	-1.30862	921
5620	GOBP_REGULATION_OF_CELL_JUNCTION_ASSEMBLY	0.00244529	0.0453274	0.431708	-0.430448	-1.4792	211
8754	GOCC_TRANSPORT_VESICLE	0.00246459	0.0456056	0.431708	-0.400014	-1.43183	323
686	GOBP_CELLULAR_RESPONSE_TO_STRESS	0.00249515	0.046091	0.431708	0.250881	1.11989	1702
6459	GOBP_REGULATION_OF_RNA_SPLICING	0.00251497	0.0463766	0.431708	0.386328	1.47157	161
341	GOBP_BIOLOGICAL_PROCESS_INVOLVED_IN_INTERACTION_WITH_HOST	0.00256118	0.0471469	0.431708	0.408747	1.50932	136
3799	GOBP_ORGANIC_HYDROXY_COMPOUND_METABOLIC_PROCESS	0.0025824	0.0472108	0.431708	-0.374019	-1.3755	476
5726	GOBP_REGULATION_OF_DNA_METABOLIC_PROCESS	0.00258234	0.0472108	0.431708	0.304444	1.27674	485
6751	GOBP_RESPONSE_TO_ALCOHOL	0.00257052	0.0472108	0.431708	-0.467915	-1.55643	146
8313	GOCC_MEMBRANE_MICRODOMAIN	0.00258033	0.0472108	0.431708	-0.391048	-1.415	369
2346	GOBP_MAMMARY_GLAND_ALVEOLUS_DEVELOPMENT	0.00260342	0.0475135	0.431708	-0.70721	-1.69179	22
5442	GOBP_REGULATION_OF_ANIMAL_ORGAN_FORMATION	0.00262142	0.0477601	0.431708	-0.658262	-1.74367	34
4140	GOBP_POSITIVE_REGULATION_OF_CALCIUM_ION_TRANSMEMBRANE_TRANSPORT	0.00262659	0.0477726	0.431708	-0.509891	-1.60484	97
6568	GOBP_REGULATION_OF_SYSTEMIC_ARTERIAL_BLOOD_PRESSURE_BY_RENIN_ANGIOTENSIN	0.00263452	0.047835	0.431708	-0.688421	-1.74963	27
4956	GOBP_POSITIVE_REGULATION_OF_T_CELL_RECEPTOR_SIGNALING_PATHWAY	0.00264382	0.0478405	0.431708	-0.760717	-1.70335	16
5586	GOBP_REGULATION_OF_CELLULAR_RESPONSE_TO_HEAT	0.00264018	0.0478405	0.431708	-0.920279	-1.60836	5
7100	GOBP_SENSORY_SYSTEM_DEVELOPMENT	0.00264846	0.0478431	0.431708	-0.378725	-1.38095	407
4181	GOBP_POSITIVE_REGULATION_OF_CELL_ACTIVATION	0.00266395	0.0480413	0.431708	-0.39192	-1.42142	375
47	GOBP_ACTIVATION_OF_INNATE_IMMUNE_RESPONSE	0.00268918	0.0484143	0.431708	0.569943	1.78676	45
3527	GOBP_NEPHRON_DEVELOPMENT	0.00269578	0.0484512	0.431708	-0.459164	-1.53235	156
3201	GOBP_NEGATIVE_REGULATION_OF_MITOTIC_CELL_CYCLE	0.00270499	0.0485347	0.431708	0.363111	1.41202	210
9086	GOMF_CATION_CHANNEL_ACTIVITY	0.00271152	0.0485699	0.431708	-0.40244	-1.44181	318
1197	GOBP_DNA_INTEGRITY_CHECKPOINT_SIGNALING	0.00272682	0.048762	0.431708	0.438536	1.5732	108
2858	GOBP_NEGATIVE_REGULATION_OF_CARTILAGE_DEVELOPMENT	0.00273827	0.0488845	0.431708	-0.682355	-1.77958	30
5778	GOBP_REGULATION_OF_EPITHELIAL_TO_MESENCHYMAL_TRANSITION	0.00275448	0.0490917	0.431708	-0.516674	-1.61239	93
887	GOBP_CHROMOSOME_CONDENSATION	0.00276866	0.049216	0.431708	0.621094	1.79722	33
5744	GOBP_REGULATION_OF_DOUBLE_STRAND_BREAK_REPAIR	0.00277071	0.049216	0.431708	0.434147	1.56584	109
6806	GOBP_RESPONSE_TO_FORSKOLIN	0.00278654	0.0494146	0.431708	-0.772508	-1.71677	15
8717	GOCC_SYNAPSE_ASSOCIATED_EXTRACELLULAR_MATRIX	0.0028032	0.0495679	0.431708	0.847647	1.70231	8
8983	GOMF_ATP_DEPENDENT_ACTIVITY_ACTING_ON_DNA	0.0028045	0.0495679	0.431708	0.430549	1.53448	104
794	GOBP_CELL_SURFACE_RECEPTOR_SIGNALING_PATHWAY_INVOLVED_IN_CELL_CELL_SIGNALING	0.00281468	0.0496654	0.431708	-0.368565	-1.35444	503
209	GOBP_ANTIGEN_PROCESSING_AND_PRESENTATION_OF_PEPTIDE_ANTIGEN_VIA_MHC_CLASS_I	0.00283668	0.0499706	0.431708	0.629118	1.77123	30
1564	GOBP_FIBROBLAST_GROWTH_FACTOR_RECEPTOR_SIGNALING_PATHWAY	0.00285516	0.0502131	0.431708	-0.52238	-1.61128	82
7547	GOBP_TRYPTOPHAN_CATABOLIC_PROCESS_TO_KYNURENINE	0.00289668	0.0508368	0.431708	0.942346	1.57999	4
8384	GOCC_M_BAND	0.00290018	0.0508368	0.431708	-0.739408	-1.69488	18
7838	GOCC_AXONEMAL_DYNEIN_COMPLEX	0.00293223	0.0512661	0.431708	-0.75827	-1.69787	16
8055	GOCC_DNA_REPLICATION_PREINITIATION_COMPLEX	0.00293431	0.0512661	0.431708	0.772583	1.7381	12
4947	GOBP_POSITIVE_REGULATION_OF_TYPE_I_INTERFERON_MEDIATED_SIGNALING_PATHWAY	0.00295603	0.0515609	0.431708	0.717727	1.79257	18
4815	GOBP_POSITIVE_REGULATION_OF_RESPONSE_TO_TUMOR_CELL	0.00296315	0.0516005	0.431708	-0.754304	-1.70796	17
4459	GOBP_POSITIVE_REGULATION_OF_INNATE_IMMUNE_RESPONSE	0.00298036	0.0518154	0.431708	0.411886	1.50711	122
4775	GOBP_POSITIVE_REGULATION_OF_PROTEIN_PHOSPHORYLATION	0.00298606	0.0518299	0.431708	-0.347522	-1.29791	700
7784	GOCC_ACTIN_FILAMENT	0.00300782	0.0521225	0.431708	-0.480954	-1.5579	125
3392	GOBP_NEGATIVE_REGULATION_OF_SECRETION	0.00304236	0.0526353	0.431708	-0.429062	-1.4672	196
1490	GOBP_EXOCYTOSIS	0.00306094	0.0528709	0.431708	-0.390404	-1.41653	381
5222	GOBP_PROTEIN_MONO_ADP_RIBOSYLATION	0.00309846	0.0534321	0.431708	0.772147	1.73712	12
5211	GOBP_PROTEIN_LOCALIZATION_TO_SYNAPSE	0.00310881	0.0535239	0.431708	-0.521908	-1.61525	83
1116	GOBP_DETECTION_OF_OTHER_ORGANISM	0.0031718	0.0543753	0.431708	0.722612	1.74347	16
8039	GOCC_DENSE_CORE_GRANULE	0.00317359	0.0543753	0.431708	-0.652951	-1.7296	34
10538	GOMF_WATER_TRANSMEMBRANE_TRANSPORTER_ACTIVITY	0.0031731	0.0543753	0.431708	-0.768228	-1.70725	15
515	GOBP_CARTILAGE_DEVELOPMENT	0.00318197	0.0544312	0.431708	-0.433455	-1.48473	204
37	GOBP_ACTIN_POLYMERIZATION_OR_DEPOLYMERIZATION	0.00320683	0.0547684	0.431708	-0.446437	-1.5129	177
5612	GOBP_REGULATION_OF_CELL_DEVELOPMENT	0.00321774	0.0548667	0.431708	-0.359882	-1.33158	566
4057	GOBP_PORPHYRIN_CONTAINING_COMPOUND_METABOLIC_PROCESS	0.00322703	0.054937	0.431708	-0.623329	-1.70945	41
1051	GOBP_DEFENSE_RESPONSE_TO_GRAM_NEGATIVE_BACTERIUM	0.00324711	0.0551905	0.431708	0.497482	1.66249	66
6201	GOBP_REGULATION_OF_NEUROTRANSMITTER_TRANSPORT	0.00326178	0.0553514	0.431708	-0.460119	-1.50921	137
747	GOBP_CELL_DIFFERENTIATION_INVOLVED_IN_METANEPHROS_DEVELOPMENT	0.00327504	0.0553997	0.431708	-0.701626	-1.71034	23
5920	GOBP_REGULATION_OF_HOMOTYPIC_CELL_CELL_ADHESION	0.00327137	0.0553997	0.431708	-0.631996	-1.71396	39
6284	GOBP_REGULATION_OF_PHOSPHATIDYLINOSITOL_3_KINASE_SIGNALING	0.00328058	0.0554054	0.431708	-0.502843	-1.57586	95
6192	GOBP_REGULATION_OF_NEURON_DIFFERENTIATION	0.00329571	0.0555727	0.431708	-0.414848	-1.43614	227
7975	GOCC_CONDENSIN_COMPLEX	0.00331286	0.0557735	0.431708	0.841387	1.68974	8
5887	GOBP_REGULATION_OF_HEART_RATE	0.00334495	0.0562248	0.431708	-0.502256	-1.61687	113
8268	GOCC_I_BAND	0.00335057	0.0562304	0.431708	-0.469831	-1.54446	138
1233	GOBP_DOPAMINE_TRANSPORT	0.00336424	0.0563709	0.431708	-0.573092	-1.66818	57
9487	GOMF_HORMONE_RECEPTOR_BINDING	0.00337515	0.0564648	0.431708	-0.676341	-1.72632	28
2000	GOBP_INOSITOL_LIPID_MEDIATED_SIGNALING	0.00340069	0.0568028	0.431708	-0.446281	-1.49859	162
4721	GOBP_POSITIVE_REGULATION_OF_PHOSPHORUS_METABOLIC_PROCESS	0.00341529	0.0569572	0.431708	-0.341306	-1.28013	850
6563	GOBP_REGULATION_OF_SYSTEMIC_ARTERIAL_BLOOD_PRESSURE_BY_CAROTID_SINUS_BARORECEPTOR_FEEDBACK	0.00344132	0.057212	0.431708	-0.910895	-1.59196	5
6571	GOBP_REGULATION_OF_SYSTEM_PROCESS	0.00343604	0.057212	0.431708	-0.351195	-1.30138	621
8478	GOCC_PERINEURONAL_NET	0.0034714	0.057622	0.431708	0.888504	1.67623	6
10559	MP_DECREASED_TUMOR_NECROSIS_FACTOR_SECRETION	0.0034773	0.05763	0.431708	0.401824	1.4708	119
131	GOBP_AMINE_METABOLIC_PROCESS	0.00352589	0.0580735	0.431708	-0.49473	-1.58183	107
5775	GOBP_REGULATION_OF_EPITHELIAL_CELL_MIGRATION	0.00351718	0.0580735	0.431708	-0.4186	-1.45363	233
7362	GOBP_SYNAPTIC_VESICLE_EXOCYTOSIS	0.00351861	0.0580735	0.431708	-0.467555	-1.53169	136
8540	GOCC_PRERIBOSOME	0.00352351	0.0580735	0.431708	0.474777	1.59232	69
4933	GOBP_POSITIVE_REGULATION_OF_TRANSMEMBRANE_TRANSPORT	0.00353266	0.0580908	0.431708	-0.415787	-1.45292	248
6290	GOBP_REGULATION_OF_PHOSPHOLIPASE_C_ACTIVITY	0.00354332	0.0580908	0.431708	-0.649413	-1.72023	34
7747	GOBP_WATER_TRANSPORT	0.00354061	0.0580908	0.431708	-0.722468	-1.68449	20
9665	GOMF_MALATE_DEHYDROGENASE_ACTIVITY	0.00355189	0.0581417	0.431708	-0.910517	-1.65925	6
7184	GOBP_SMOOTH_MUSCLE_CELL_MATRIX_ADHESION	0.00356247	0.0582253	0.431708	-0.878496	-1.63804	7
1215	GOBP_DNA_STRAND_ELONGATION_INVOLVED_IN_DNA_REPLICATION	0.00359093	0.0585106	0.431708	0.767667	1.72704	12
7285	GOBP_STEM_CELL_PROLIFERATION	0.00358989	0.0585106	0.431708	-0.475246	-1.55342	134
2722	GOBP_MYELOID_CELL_DIFFERENTIATION	0.00361371	0.0587021	0.431708	-0.378592	-1.38073	404
7209	GOBP_SODIUM_ION_TRANSPORT	0.00360916	0.0587021	0.431708	-0.413434	-1.43266	230
4267	GOBP_POSITIVE_REGULATION_OF_CYTOSOLIC_CALCIUM_ION_CONCENTRATION_INVOLVED_IN_PHOSPHOLIPASE_C_ACTIVATING_G_PROTEIN_COUPLED_SIGNALING_PATHWAY	0.00363631	0.0588176	0.431708	-0.655606	-1.73311	33
5611	GOBP_REGULATION_OF_CELL_DEATH	0.00362831	0.0588176	0.431708	-0.31674	-1.21081	1617
6186	GOBP_REGULATION_OF_NEUROBLAST_PROLIFERATION	0.0036374	0.0588176	0.431708	-0.59641	-1.67539	46
4601	GOBP_POSITIVE_REGULATION_OF_MOLECULAR_FUNCTION	0.00364682	0.0588804	0.431708	-0.323353	-1.23212	1410
2890	GOBP_NEGATIVE_REGULATION_OF_CELL_DEATH	0.00365326	0.0588949	0.431708	-0.333153	-1.25988	1013
8984	GOMF_ATP_DEPENDENT_ACTIVITY_ACTING_ON_RNA	0.00368011	0.059238	0.431708	0.473942	1.58952	69
8918	GOMF_AMINE_TRANSMEMBRANE_TRANSPORTER_ACTIVITY	0.00369624	0.0594078	0.431708	-0.909394	-1.58934	5
3308	GOBP_NEGATIVE_REGULATION_OF_PLATELET_ACTIVATION	0.00371624	0.0596393	0.431708	-0.732262	-1.70293	19
1597	GOBP_FORMATION_OF_PRIMARY_GERM_LAYER	0.00373076	0.059782	0.431708	-0.491627	-1.56069	104
1669	GOBP_GLIOGENESIS	0.00382143	0.0610692	0.431708	-0.391769	-1.41044	345
2829	GOBP_NEGATIVE_REGULATION_OF_BLOOD_PRESSURE	0.0038283	0.0610692	0.431708	-0.542258	-1.61301	66
3662	GOBP_NOTOCHORD_DEVELOPMENT	0.00382596	0.0610692	0.431708	-0.696504	-1.69785	23
6967	GOBP_RETINOIC_ACID_CATABOLIC_PROCESS	0.00384542	0.0612457	0.431708	0.911428	1.63146	5
7117	GOBP_SEROTONIN_UPTAKE	0.00385088	0.0612457	0.431708	-0.810473	-1.73548	12
2573	GOBP_MITOCHONDRIAL_TRANSLATION	0.00389337	0.0618291	0.431708	0.398852	1.45992	119
10532	GOMF_VOLTAGE_GATED_POTASSIUM_CHANNEL_ACTIVITY_INVOLVED_IN_CARDIAC_MUSCLE_CELL_ACTION_POTENTIAL_REPOLARIZATION	0.00390025	0.061846	0.431708	-0.780528	-1.69251	13
5934	GOBP_REGULATION_OF_IMMATURE_T_CELL_PROLIFERATION	0.0039172	0.0620224	0.407018	-0.762467	-1.69445	15
2671	GOBP_MRNA_EXPORT_FROM_NUCLEUS	0.00399001	0.0629152	0.407018	0.545108	1.73494	50
6802	GOBP_RESPONSE_TO_FIBROBLAST_GROWTH_FACTOR	0.00399133	0.0629152	0.407018	-0.495438	-1.56527	99
7641	GOBP_VACUOLAR_LOCALIZATION	0.00398549	0.0629152	0.407018	-0.518059	-1.59771	81
6562	GOBP_REGULATION_OF_SYSTEMIC_ARTERIAL_BLOOD_PRESSURE_BY_BARORECEPTOR_FEEDBACK	0.00402244	0.0633118	0.407018	-0.907346	-1.65347	6
3244	GOBP_NEGATIVE_REGULATION_OF_NEURON_DIFFERENTIATION	0.00407552	0.0640524	0.407018	-0.51314	-1.59033	86
2639	GOBP_MONONUCLEAR_CELL_MIGRATION	0.00411231	0.0645354	0.407018	-0.442469	-1.50078	169
2815	GOBP_NEGATIVE_REGULATION_OF_ATPASE_COUPLED_CALCIUM_TRANSMEMBRANE_TRANSPORTER_ACTIVITY	0.0041693	0.065046	0.407018	0.932752	1.56391	4
3553	GOBP_NEUROBLAST_PROLIFERATION	0.00416157	0.065046	0.407018	-0.519949	-1.58308	75
6605	GOBP_REGULATION_OF_TRANSCRIPTION_INITIATION_BY_RNA_POLYMERASE_II	0.00416669	0.065046	0.407018	0.471337	1.58482	68
9510	GOMF_IGG_BINDING	0.00415387	0.065046	0.407018	0.850681	1.6423	7
473	GOBP_CARDIAC_CHAMBER_DEVELOPMENT	0.00419221	0.0652939	0.407018	-0.439314	-1.49458	184
813	GOBP_CENTROSOME_DUPLICATION	0.00419746	0.0652939	0.407018	0.49018	1.63809	66
5632	GOBP_REGULATION_OF_CELL_SHAPE	0.00421762	0.0655116	0.407018	-0.454335	-1.51435	149
1822	GOBP_HEPARAN_SULFATE_PROTEOGLYCAN_BIOSYNTHETIC_PROCESS	0.00422652	0.0655542	0.407018	-0.672285	-1.71597	28
5208	GOBP_PROTEIN_LOCALIZATION_TO_PLASMA_MEMBRANE	0.0042422	0.0657017	0.407018	-0.402938	-1.43195	290
1401	GOBP_EPITHELIAL_CELL_PROLIFERATION	0.00427652	0.0658498	0.407018	-0.370379	-1.36173	470
2621	GOBP_MODULATION_OF_INHIBITORY_POSTSYNAPTIC_POTENTIAL	0.0042759	0.0658498	0.407018	-0.838521	-1.67526	9
4096	GOBP_POSITIVE_REGULATION_OF_ANTIGEN_RECEPTOR_MEDIATED_SIGNALING_PATHWAY	0.00427567	0.0658498	0.407018	-0.692496	-1.69897	24
5294	GOBP_PURINE_DEOXYRIBONUCLEOTIDE_CATABOLIC_PROCESS	0.00426396	0.0658498	0.407018	0.748069	1.72348	13
6149	GOBP_REGULATION_OF_MRNA_SPLICING_VIA_SPLICEOSOME	0.00428995	0.065961	0.407018	0.432636	1.53005	100
799	GOBP_CENTRAL_NERVOUS_SYSTEM_DEVELOPMENT	0.00436706	0.0668568	0.407018	-0.33472	-1.26019	897
2468	GOBP_MESODERM_MORPHOGENESIS	0.00436548	0.0668568	0.407018	-0.540914	-1.61829	70
4291	GOBP_POSITIVE_REGULATION_OF_DNA_METABOLIC_PROCESS	0.0043622	0.0668568	0.407018	0.331518	1.34068	297
7281	GOBP_STEM_CELL_DIFFERENTIATION	0.00438272	0.0670002	0.407018	-0.40556	-1.42172	259
7898	GOCC_CELL_CELL_CONTACT_ZONE	0.00439724	0.0671258	0.407018	-0.516534	-1.5954	84
1500	GOBP_EXTRACELLULAR_MATRIX_DISASSEMBLY	0.00443811	0.0676525	0.407018	-0.624711	-1.67237	36
6808	GOBP_RESPONSE_TO_FUNGUS	0.00445561	0.0678221	0.407018	0.510319	1.65278	56
1221	GOBP_DNA_TEMPLATED_TRANSCRIPTION_INITIATION	0.00448777	0.0678649	0.407018	0.396463	1.45117	119
1305	GOBP_EMBRYO_DEVELOPMENT	0.00448922	0.0678649	0.407018	-0.327619	-1.24363	1231
6611	GOBP_REGULATION_OF_TRANSFORMING_GROWTH_FACTOR_BETA_ACTIVATION	0.00449018	0.0678649	0.407018	-0.865919	-1.66882	8
7877	GOCC_CALYX_OF_HELD	0.00447184	0.0678649	0.407018	-0.686289	-1.7329	26
10083	GOMF_PRE_MRNA_BINDING	0.00449031	0.0678649	0.407018	0.58322	1.7113	35
324	GOBP_BASE_EXCISION_REPAIR	0.0045354	0.0684492	0.407018	0.581652	1.74415	38
1839	GOBP_HIGH_DENSITY_LIPOPROTEIN_PARTICLE_CLEARANCE	0.0045677	0.0688391	0.407018	0.80038	1.68266	10
4557	GOBP_POSITIVE_REGULATION_OF_MAST_CELL_ACTIVATION_INVOLVED_IN_IMMUNE_RESPONSE	0.0046059	0.0692487	0.407018	-0.693032	-1.65787	22
9251	GOMF_DNA_REPLICATION_ORIGIN_BINDING	0.0046079	0.0692487	0.407018	0.714798	1.68144	15
8887	GOMF_ADENYLYLTRANSFERASE_ACTIVITY	0.00461824	0.0693062	0.407018	0.639474	1.72869	25
1214	GOBP_DNA_STRAND_ELONGATION	0.0046299	0.0693834	0.407018	0.605264	1.75141	33
2066	GOBP_INTRACELLULAR_RECEPTOR_SIGNALING_PATHWAY	0.00464781	0.0695537	0.407018	0.362399	1.39602	201
2157	GOBP_LENS_DEVELOPMENT_IN_CAMERA_TYPE_EYE	0.00469808	0.0700564	0.407018	-0.5211	-1.6087	85
3853	GOBP_PARACRINE_SIGNALING	0.0047209	0.0700564	0.407018	-0.904945	-1.58156	5
6860	GOBP_RESPONSE_TO_LIPID	0.00470859	0.0700564	0.407018	-0.35315	-1.31244	646
7156	GOBP_SKELETAL_MUSCLE_SATELLITE_CELL_PROLIFERATION	0.0047142	0.0700564	0.407018	-0.774962	-1.68044	13
9060	GOMF_CARBOHYDRATE_PROTON_SYMPORTER_ACTIVITY	0.0047209	0.0700564	0.407018	-0.905186	-1.58198	5
10353	GOMF_SULFOTRANSFERASE_ACTIVITY	0.00471843	0.0700564	0.407018	-0.588958	-1.6617	47
725	GOBP_CELL_CELL_JUNCTION_ORGANIZATION	0.00473041	0.0700997	0.407018	-0.423172	-1.45065	199
10446	GOMF_TRANSMEMBRANE_TRANSPORTER_BINDING	0.00475005	0.0702928	0.407018	-0.45397	-1.49945	141
78	GOBP_ADENYLATE_CYCLASE_ACTIVATING_G_PROTEIN_COUPLED_RECEPTOR_SIGNALING_PATHWAY	0.00477284	0.0703365	0.407018	-0.457422	-1.49073	133
1329	GOBP_ENDODERMAL_CELL_FATE_SPECIFICATION	0.00476864	0.0703365	0.407018	-0.863328	-1.66382	8
2368	GOBP_MAST_CELL_DIFFERENTIATION	0.00476168	0.0703365	0.407018	-0.872279	-1.62645	7
1193	GOBP_DNA_DUPLEX_UNWINDING	0.00478706	0.0704069	0.407018	0.564175	1.71231	40
4556	GOBP_POSITIVE_REGULATION_OF_MAST_CELL_ACTIVATION	0.00479746	0.0704069	0.407018	-0.653812	-1.68759	29
8646	GOCC_SECRETORY_VESICLE	0.00479295	0.0704069	0.407018	-0.362952	-1.34278	563
1963	GOBP_IMPORT_INTO_CELL	0.00482201	0.0706696	0.407018	-0.417698	-1.45329	240
81	GOBP_ADENYLATE_CYCLASE_INHIBITING_G_PROTEIN_COUPLED_RECEPTOR_SIGNALING_PATHWAY	0.00484917	0.0707064	0.407018	-0.536006	-1.59442	66
792	GOBP_CELL_SUBSTRATE_JUNCTION_ORGANIZATION	0.00486018	0.0707064	0.407018	-0.490206	-1.54874	99
2017	GOBP_INTEGRIN_MEDIATED_SIGNALING_PATHWAY	0.00486018	0.0707064	0.407018	-0.498729	-1.56709	96
4835	GOBP_POSITIVE_REGULATION_OF_SIGNALING	0.00486438	0.0707064	0.407018	-0.316209	-1.20956	1660
4840	GOBP_POSITIVE_REGULATION_OF_SKELETAL_MUSCLE_ACETYLCHOLINE_GATED_CHANNEL_CLUSTERING	0.00484539	0.0707064	0.407018	0.929586	1.5586	4
5405	GOBP_REGULATION_OF_ACTIN_FILAMENT_LENGTH	0.00484688	0.0707064	0.407018	-0.451755	-1.50809	151
244	GOBP_AROMATIC_AMINO_ACID_FAMILY_CATABOLIC_PROCESS	0.00487523	0.0707263	0.407018	0.743009	1.74821	14
5504	GOBP_REGULATION_OF_BONE_REMODELING	0.00487905	0.0707263	0.407018	-0.547807	-1.61755	61
3474	GOBP_NEGATIVE_REGULATION_OF_TRIGLYCERIDE_CATABOLIC_PROCESS	0.00489075	0.0707803	0.407018	0.905904	1.62157	5
6887	GOBP_RESPONSE_TO_ORGANOPHOSPHORUS	0.00489608	0.0707803	0.407018	-0.5049	-1.56577	87
4013	GOBP_PLASMA_MEMBRANE_ORGANIZATION	0.00491638	0.0709774	0.407018	-0.455069	-1.5137	146
3961	GOBP_PHOSPHATIDYLINOSITOL_3_KINASE_SIGNALING	0.00494325	0.0712685	0.407018	-0.470604	-1.52438	125
6540	GOBP_REGULATION_OF_SUPRAMOLECULAR_FIBER_ORGANIZATION	0.00495367	0.0713222	0.407018	-0.389018	-1.40168	357
4659	GOBP_POSITIVE_REGULATION_OF_NEUTROPHIL_DEGRANULATION	0.00496542	0.0713946	0.407018	0.905299	1.62049	5
8800	GOCC_VOLTAGE_GATED_POTASSIUM_CHANNEL_COMPLEX	0.00498762	0.0716171	0.407018	-0.532326	-1.62885	76
5576	GOBP_REGULATION_OF_CELLULAR_COMPONENT_SIZE	0.00501183	0.0718678	0.407018	-0.382618	-1.3845	369
1050	GOBP_DEFENSE_RESPONSE_TO_FUNGUS	0.00503721	0.0721345	0.407018	0.538866	1.69313	46
1945	GOBP_IMMATURE_T_CELL_PROLIFERATION	0.00504434	0.0721394	0.407018	-0.732931	-1.65957	17
353	GOBP_BLOOD_COAGULATION_INTRINSIC_PATHWAY	0.00505334	0.0721712	0.407018	-0.771443	-1.67281	13
170	GOBP_ANATOMICAL_STRUCTURE_HOMEOSTASIS	0.00510752	0.0722914	0.407018	-0.391294	-1.39913	313
2058	GOBP_INTESTINE_SMOOTH_MUSCLE_CONTRACTION	0.00508392	0.0722914	0.407018	-0.835729	-1.66968	9
2519	GOBP_MICROTUBULE_ORGANIZING_CENTER_ORGANIZATION	0.00508207	0.0722914	0.407018	0.395194	1.45927	136
4943	GOBP_POSITIVE_REGULATION_OF_TUMOR_NECROSIS_FACTOR_SUPERFAMILY_CYTOKINE_PRODUCTION	0.00509971	0.0722914	0.407018	0.429577	1.53469	102
6671	GOBP_REGULATION_OF_VASCULAR_PERMEABILITY	0.00508624	0.0722914	0.407018	-0.619128	-1.72291	45
6945	GOBP_RESPONSE_TO_XENOBIOTIC_STIMULUS	0.00510932	0.0722914	0.407018	-0.405582	-1.41158	244
7223	GOBP_SOMITOGENESIS	0.00509784	0.0722914	0.407018	-0.52485	-1.60532	77
1413	GOBP_EPITHELIAL_TUBE_MORPHOGENESIS	0.00512613	0.0724329	0.407018	-0.374877	-1.36438	395
883	GOBP_CHROMATIN_ORGANIZATION	0.00514763	0.0724739	0.407018	0.296409	1.24239	481
5053	GOBP_PRIMITIVE_HEMOPOIESIS	0.00514946	0.0724739	0.407018	-0.816642	-1.70585	11
5773	GOBP_REGULATION_OF_EPITHELIAL_CELL_DIFFERENTIATION	0.00513874	0.0724739	0.407018	-0.4407	-1.47893	159
2601	GOBP_MITOTIC_RECOMBINATION	0.0051775	0.0727722	0.407018	0.637717	1.72394	25
548	GOBP_CELLULAR_ANION_HOMEOSTASIS	0.00519212	0.0728815	0.407018	-0.67745	-1.71058	26
6510	GOBP_REGULATION_OF_SOMATIC_STEM_CELL_POPULATION_MAINTENANCE	0.00528587	0.0740997	0.407018	-0.814947	-1.70231	11
5763	GOBP_REGULATION_OF_ENDOTHELIAL_CELL_CHEMOTAXIS	0.00529511	0.0741315	0.407018	-0.687065	-1.67485	23
1668	GOBP_GLIAL_CELL_PROLIFERATION	0.00530288	0.0741428	0.407018	-0.531971	-1.59703	71
584	GOBP_CELLULAR_NITROGEN_COMPOUND_CATABOLIC_PROCESS	0.00533242	0.0743603	0.407018	0.312588	1.28295	376
8593	GOCC_RECEPTOR_COMPLEX	0.00532907	0.0743603	0.407018	-0.375443	-1.37359	417
7275	GOBP_SPROUTING_ANGIOGENESIS	0.00534057	0.0743765	0.407018	-0.47973	-1.54108	117
6499	GOBP_REGULATION_OF_SMOOTH_MUSCLE_CELL_DIFFERENTIATION	0.00535557	0.0743907	0.407018	-0.634918	-1.67067	31
7903	GOCC_CELL_LEADING_EDGE	0.0053542	0.0743907	0.407018	-0.375346	-1.36251	380
9677	GOMF_MAP_KINASE_PHOSPHATASE_ACTIVITY	0.00536977	0.0744907	0.407018	-0.730467	-1.65399	17
7979	GOCC_CONTRACTILE_FIBER	0.00537809	0.074509	0.407018	-0.413734	-1.43138	228
4223	GOBP_POSITIVE_REGULATION_OF_CHEMOTAXIS	0.00538886	0.074561	0.407018	-0.448347	-1.48865	143
6564	GOBP_REGULATION_OF_SYSTEMIC_ARTERIAL_BLOOD_PRESSURE_BY_CIRCULATORY_RENIN_ANGIOTENSIN	0.00540636	0.074706	0.407018	-0.752996	-1.6734	15
8682	GOCC_SPECTRIN	0.00547193	0.0755141	0.407018	-0.898201	-1.63681	6
6088	GOBP_REGULATION_OF_MESONEPHROS_DEVELOPMENT	0.0055992	0.0771703	0.407018	-0.900677	-1.5741	5
2688	GOBP_MULTICELLULAR_ORGANISMAL_SIGNALING	0.00564519	0.0776115	0.407018	-0.445784	-1.49561	160
6909	GOBP_RESPONSE_TO_RETINOIC_ACID	0.0056458	0.0776115	0.407018	-0.516817	-1.58907	79
4787	GOBP_POSITIVE_REGULATION_OF_PSEUDOPODIUM_ASSEMBLY	0.00568995	0.0781175	0.407018	-0.831664	-1.66156	9
3582	GOBP_NEURON_MIGRATION	0.00574445	0.078495	0.407018	-0.429327	-1.45973	185
5745	GOBP_REGULATION_OF_DOUBLE_STRAND_BREAK_REPAIR_VIA_HOMOLOGOUS_RECOMBINATION	0.00574153	0.078495	0.407018	0.508966	1.65702	58
6150	GOBP_REGULATION_OF_MUCUS_SECRETION	0.00573163	0.078495	0.407018	-0.766215	-1.66147	13
6904	GOBP_RESPONSE_TO_PURINE_CONTAINING_COMPOUND	0.00574696	0.078495	0.407018	-0.48275	-1.53251	104
2437	GOBP_MEMBRANE_REPOLARIZATION	0.00575628	0.0785216	0.407018	-0.614975	-1.71135	45
3608	GOBP_NEUROTRANSMITTER_UPTAKE	0.00577365	0.0786576	0.407018	-0.597933	-1.63318	40
3606	GOBP_NEUROTRANSMITTER_SECRETION	0.00578951	0.0787728	0.407018	-0.432425	-1.46611	182
1353	GOBP_ENDOTHELIAL_CELL_CHEMOTAXIS	0.00580764	0.0789186	0.407018	-0.659538	-1.72007	30
8056	GOCC_DOPAMINERGIC_SYNAPSE	0.00582901	0.079108	0.407018	-0.72981	-1.63415	16
2144	GOBP_LATERAL_MESODERM_DEVELOPMENT	0.00589047	0.0796374	0.407018	-0.727491	-1.64725	17
4883	GOBP_POSITIVE_REGULATION_OF_SYNAPTIC_TRANSMISSION	0.00588681	0.0796374	0.407018	-0.427388	-1.45334	189
9954	GOMF_PATTERN_RECOGNITION_RECEPTOR_ACTIVITY	0.00588984	0.0796374	0.407018	0.612449	1.70446	28
582	GOBP_CELLULAR_MONOVALENT_INORGANIC_ANION_HOMEOSTASIS	0.00595556	0.0802899	0.407018	-0.727289	-1.64679	17
2461	GOBP_MESENCHYME_MORPHOGENESIS	0.00595263	0.0802899	0.407018	-0.557844	-1.6238	57
7187	GOBP_SMOOTH_MUSCLE_CONTRACTION	0.00596138	0.0802899	0.407018	-0.470559	-1.51248	115
4627	GOBP_POSITIVE_REGULATION_OF_MYELOID_LEUKOCYTE_MEDIATED_IMMUNITY	0.00599233	0.080503	0.407018	0.64953	1.69965	22
5634	GOBP_REGULATION_OF_CELL_SUBSTRATE_ADHESION	0.00598749	0.080503	0.407018	-0.422164	-1.45009	213
8133	GOCC_FASCIA_ADHERENS	0.00600295	0.080544	0.407018	-0.764473	-1.65769	13
4865	GOBP_POSITIVE_REGULATION_OF_STEM_CELL_PROLIFERATION	0.00602147	0.0806907	0.407018	-0.540327	-1.59546	61
3653	GOBP_NOREPINEPHRINE_METABOLIC_PROCESS	0.00605382	0.0808999	0.407018	-0.749874	-1.66646	15
7886	GOCC_CATION_CHANNEL_COMPLEX	0.00605989	0.0808999	0.407018	-0.413198	-1.41993	211
8526	GOCC_POSTSYNAPTIC_DENSITY_MEMBRANE	0.00604866	0.0808999	0.407018	-0.48666	-1.52515	95
9036	GOMF_CALCIUM_DEPENDENT_CYSTEINE_TYPE_ENDOPEPTIDASE_ACTIVITY	0.00613861	0.0818481	0.407018	-0.763428	-1.65543	13
2816	GOBP_NEGATIVE_REGULATION_OF_ATP_DEPENDENT_ACTIVITY	0.00617255	0.0821976	0.407018	0.661763	1.68898	20
5954	GOBP_REGULATION_OF_INTERLEUKIN_18_PRODUCTION	0.00618567	0.0822693	0.407018	0.819878	1.64655	8
1311	GOBP_ENDOCARDIAL_CUSHION_DEVELOPMENT	0.00621312	0.0825314	0.407018	-0.580558	-1.65625	51
4481	GOBP_POSITIVE_REGULATION_OF_INTERLEUKIN_6_PRODUCTION	0.00623081	0.0826631	0.407018	0.429347	1.50845	97
8720	GOCC_SYNAPTIC_VESICLE_MEMBRANE	0.00624833	0.0826893	0.407018	-0.479689	-1.52851	106
9887	GOMF_ORGANIC_HYDROXY_COMPOUND_TRANSMEMBRANE_TRANSPORTER_ACTIVITY	0.00624348	0.0826893	0.407018	-0.609225	-1.64364	38
9410	GOMF_GROWTH_FACTOR_RECEPTOR_BINDING	0.00626992	0.0828719	0.407018	-0.445691	-1.48554	149
2244	GOBP_LUNG_ALVEOLUS_DEVELOPMENT	0.00627988	0.0829006	0.407018	-0.53707	-1.58409	62
2619	GOBP_MODULATION_BY_SYMBIONT_OF_ENTRY_INTO_HOST	0.00630081	0.0830739	0.407018	0.494895	1.59226	53
3475	GOBP_NEGATIVE_REGULATION_OF_TRIGLYCERIDE_METABOLIC_PROCESS	0.00631001	0.0830922	0.407018	0.752973	1.69398	12
4144	GOBP_POSITIVE_REGULATION_OF_CALCIUM_ION_TRANSPORT_INTO_CYTOSOL	0.00634427	0.0833371	0.407018	-0.727102	-1.62808	16
6434	GOBP_REGULATION_OF_RESPONSE_TO_EXTERNAL_STIMULUS	0.00634086	0.0833371	0.407018	-0.331775	-1.2486	894
94	GOBP_ADULT_BEHAVIOR	0.00638165	0.0836217	0.407018	-0.429008	-1.45307	180
2599	GOBP_MITOTIC_METAPHASE_PLATE_CONGRESSION	0.00638043	0.0836217	0.407018	0.522986	1.66825	49
205	GOBP_ANTIGEN_PROCESSING_AND_PRESENTATION_OF_EXOGENOUS_PEPTIDE_ANTIGEN	0.006397	0.0837197	0.407018	0.614758	1.6691	26
180	GOBP_ANIMAL_ORGAN_FORMATION	0.00641695	0.0838775	0.407018	-0.516951	-1.57435	74
4758	GOBP_POSITIVE_REGULATION_OF_PROTEIN_LOCALIZATION	0.00644488	0.0841393	0.407018	-0.36458	-1.33679	447
469	GOBP_CARBOXYLIC_ACID_TRANSPORT	0.00652229	0.0847751	0.407018	-0.388914	-1.36988	266
4169	GOBP_POSITIVE_REGULATION_OF_CELLULAR_AMINE_METABOLIC_PROCESS	0.0065297	0.0847751	0.407018	-0.796971	-1.70657	12
5406	GOBP_REGULATION_OF_ACTIN_FILAMENT_ORGANIZATION	0.00652706	0.0847751	0.407018	-0.404926	-1.41575	252
7932	GOCC_CHROMOSOME_PASSENGER_COMPLEX	0.00652452	0.0847751	0.407018	0.870783	1.6428	6
9870	GOMF_OLFACTORY_RECEPTOR_BINDING	0.00653342	0.0847751	0.407018	0.89809	1.60759	5
3508	GOBP_NEGATIVE_REGULATION_OF_VASCULAR_PERMEABILITY	0.00657547	0.0850097	0.407018	-0.714867	-1.66248	19
7169	GOBP_SMALL_GTPASE_MEDIATED_SIGNAL_TRANSDUCTION	0.00656033	0.0850097	0.407018	-0.366996	-1.34079	413
7434	GOBP_TISSUE_HOMEOSTASIS	0.00657061	0.0850097	0.407018	-0.400389	-1.40347	256
9056	GOMF_CARBOHYDRATE_CATION_SYMPORTER_ACTIVITY	0.00661341	0.0853965	0.407018	-0.759027	-1.64589	13
957	GOBP_CONNECTIVE_TISSUE_DEVELOPMENT	0.00665579	0.0858396	0.407018	-0.385699	-1.36564	279
1248	GOBP_DOUBLE_STRAND_BREAK_REPAIR_VIA_SYNTHESIS_DEPENDENT_STRAND_ANNEALING	0.00671602	0.0864256	0.407018	0.83853	1.61885	7
2022	GOBP_INTERFERON_GAMMA_PRODUCTION	0.00673373	0.0864256	0.407018	-0.462176	-1.49897	126
5522	GOBP_REGULATION_OF_CALCIUM_ION_BINDING	0.00673021	0.0864256	0.407018	0.94891	1.49168	3
7789	GOCC_ADHERENS_JUNCTION	0.00672363	0.0864256	0.407018	-0.46241	-1.5011	131
3539	GOBP_NEURAL_FOLD_FORMATION	0.00676732	0.0867522	0.407018	-0.823486	-1.64522	9
2583	GOBP_MITOTIC_CELL_CYCLE	0.00680543	0.0871358	0.407018	0.27423	1.19469	823
1825	GOBP_HEPARAN_SULFATE_PROTEOGLYCAN_METABOLIC_PROCESS	0.00684962	0.087572	0.407018	-0.60714	-1.63801	38
6744	GOBP_RESPIRATORY_SYSTEM_DEVELOPMENT	0.00685597	0.087572	0.407018	-0.403622	-1.4084	250
4313	GOBP_POSITIVE_REGULATION_OF_ENDOTHELIAL_CELL_CHEMOTAXIS	0.00686807	0.0876214	0.407018	-0.723933	-1.63919	17
2380	GOBP_MATURATION_OF_SSU_RRNA	0.00690886	0.0877152	0.407018	0.541778	1.69846	45
3587	GOBP_NEURON_PROJECTION_GUIDANCE	0.00690597	0.0877152	0.407018	-0.406173	-1.41733	246
4389	GOBP_POSITIVE_REGULATION_OF_GLUCAGON_SECRETION	0.00691664	0.0877152	0.407018	-0.894711	-1.56367	5
6494	GOBP_REGULATION_OF_SMALL_GTPASE_MEDIATED_SIGNAL_TRANSDUCTION	0.00690989	0.0877152	0.407018	-0.410958	-1.41977	225
8228	GOCC_INTERCALATED_DISC	0.00688798	0.0877152	0.407018	-0.545694	-1.61167	64
8317	GOCC_METHYLTRANSFERASE_COMPLEX	0.00695851	0.0881411	0.407018	0.429852	1.49857	90
10504	GOMF_UREA_TRANSMEMBRANE_TRANSPORTER_ACTIVITY	0.00698983	0.0884325	0.407018	-0.893222	-1.56107	5
2341	GOBP_MALE_MEIOTIC_NUCLEAR_DIVISION	0.00700285	0.0884921	0.407018	0.541057	1.6962	45
6442	GOBP_REGULATION_OF_RESPONSE_TO_TUMOR_CELL	0.00702809	0.0887056	0.407018	-0.653702	-1.66854	28
4907	GOBP_POSITIVE_REGULATION_OF_TOLL_LIKE_RECEPTOR_9_SIGNALING_PATHWAY	0.00705251	0.0889085	0.407018	0.866651	1.63501	6
3286	GOBP_NEGATIVE_REGULATION_OF_OXIDOREDUCTASE_ACTIVITY	0.00707455	0.0890668	0.407018	-0.678037	-1.65284	23
8596	GOCC_REPLICATION_FORK	0.00708182	0.0890668	0.407018	0.467533	1.55556	63
4635	GOBP_POSITIVE_REGULATION_OF_NATURAL_KILLER_CELL_MEDIATED_IMMUNE_RESPONSE_TO_TUMOR_CELL	0.00716012	0.0899453	0.407018	-0.859815	-1.60321	7
8660	GOCC_SITE_OF_DNA_DAMAGE	0.00718673	0.0901731	0.407018	0.448385	1.50799	70
4658	GOBP_POSITIVE_REGULATION_OF_NEUTROPHIL_ACTIVATION	0.00727879	0.0912082	0.407018	0.865297	1.63245	6
6983	GOBP_RHO_PROTEIN_SIGNAL_TRANSDUCTION	0.00728637	0.0912082	0.407018	-0.454129	-1.47494	128
723	GOBP_CELL_CELL_JUNCTION_ASSEMBLY	0.00730261	0.0913041	0.407018	-0.439572	-1.45951	143
5326	GOBP_PYRIMIDINE_CONTAINING_COMPOUND_METABOLIC_PROCESS	0.00733423	0.0915918	0.407018	0.482754	1.5754	59
5375	GOBP_RAS_PROTEIN_SIGNAL_TRANSDUCTION	0.00735447	0.0917368	0.407018	-0.381286	-1.36559	325
1008	GOBP_CYCLIC_NUCLEOTIDE_MEDIATED_SIGNALING	0.0073889	0.0919508	0.407018	-0.50093	-1.55808	89
4624	GOBP_POSITIVE_REGULATION_OF_MYELOID_CELL_DIFFERENTIATION	0.0073889	0.0919508	0.407018	-0.474716	-1.507	104
5181	GOBP_PROTEIN_LOCALIZATION_TO_CONDENSED_CHROMOSOME	0.0074157	0.0921765	0.407018	0.692538	1.67091	16
9545	GOMF_INTERLEUKIN_2_RECEPTOR_BINDING	0.00742898	0.0922337	0.407018	-0.891392	-1.55787	5
3432	GOBP_NEGATIVE_REGULATION_OF_SUPRAMOLECULAR_FIBER_ORGANIZATION	0.00748274	0.092793	0.407018	-0.434281	-1.47195	168
9423	GOMF_G_PROTEIN_ALPHA_SUBUNIT_BINDING	0.00754016	0.0933961	0.407018	-0.604547	-1.63952	39
5639	GOBP_REGULATION_OF_CEREBELLAR_GRANULE_CELL_PRECURSOR_PROLIFERATION	0.00756636	0.0936118	0.407018	-0.754653	-1.6364	13
1664	GOBP_GLIAL_CELL_DIFFERENTIATION	0.00767622	0.0948607	0.407018	-0.407758	-1.4211	245
2557	GOBP_MITOCHONDRIAL_GENE_EXPRESSION	0.00773346	0.0954571	0.407018	0.375671	1.39091	144
1394	GOBP_EPITHELIAL_CELL_DEVELOPMENT	0.00785291	0.0968192	0.38073	-0.407278	-1.40905	228
8306	GOCC_MCM_COMPLEX	0.00786693	0.0968798	0.38073	0.758543	1.65967	11
1548	GOBP_FEEDING_BEHAVIOR	0.00788209	0.0969543	0.38073	-0.458985	-1.48862	126
5159	GOBP_PROTEIN_KINASE_C_ACTIVATING_G_PROTEIN_COUPLED_RECEPTOR_SIGNALING_PATHWAY	0.00790208	0.0970466	0.38073	-0.659524	-1.66531	26
9193	GOMF_CYTOSKELETAL_PROTEIN_BINDING	0.00790784	0.0970466	0.38073	-0.330126	-1.24455	926
1395	GOBP_EPITHELIAL_CELL_DIFFERENTIATION	0.00792304	0.0971212	0.38073	-0.339817	-1.26604	663
8896	GOMF_ALCOHOL_BINDING	0.00797138	0.0976013	0.38073	-0.490275	-1.52042	87
7258	GOBP_SPINDLE_ASSEMBLY	0.00799364	0.0977612	0.38073	0.407359	1.45184	104
4936	GOBP_POSITIVE_REGULATION_OF_TRANSPORTER_ACTIVITY	0.00802024	0.0979109	0.38073	-0.451781	-1.46732	128
8406	GOCC_NMS_COMPLEX	0.00802427	0.0979109	0.38073	0.778714	1.63711	10
9187	GOMF_CYTOKINE_ACTIVITY	0.00812472	0.099023	0.38073	-0.421851	-1.43452	189
3620	GOBP_NEUTROPHIL_DEGRANULATION	0.00815264	0.0992495	0.38073	0.72545	1.7069	14
6366	GOBP_REGULATION_OF_PROTEIN_KINASE_B_SIGNALING	0.00823188	0.1001	0.38073	-0.427198	-1.43451	162
6924	GOBP_RESPONSE_TO_THYROID_HORMONE	0.008248	0.10013	0.38073	-0.751131	-1.62876	13
9214	GOMF_DELTA_3_DELTA_2_ENOYL_COA_ISOMERASE_ACTIVITY	0.00826261	0.10013	0.38073	-0.927426	-1.55196	4
9406	GOMF_GPI_ANCHOR_BINDING	0.00826232	0.10013	0.38073	0.8617	1.62567	6
7927	GOCC_CHROMOCENTER	0.00828303	0.100263	0.38073	0.678206	1.69386	18
788	GOBP_CELL_RECOGNITION	0.00833165	0.100737	0.38073	-0.429693	-1.44199	159
8393	GOCC_NEURONAL_DENSE_CORE_VESICLE	0.00834982	0.100842	0.38073	-0.719582	-1.61124	16
7989	GOCC_CORTICAL_ACTIN_CYTOSKELETON	0.00836177	0.100872	0.38073	-0.496069	-1.53012	82
2483	GOBP_METANEPHRIC_NEPHRON_EPITHELIUM_DEVELOPMENT	0.00837566	0.100925	0.38073	-0.692716	-1.61512	20
496	GOBP_CARDIAC_NEURAL_CREST_CELL_DEVELOPMENT_INVOLVED_IN_OUTFLOW_TRACT_MORPHOGENESIS	0.00839361	0.101027	0.38073	-0.738916	-1.64211	15
6566	GOBP_REGULATION_OF_SYSTEMIC_ARTERIAL_BLOOD_PRESSURE_BY_HORMONE	0.00842561	0.101298	0.38073	-0.59144	-1.62199	41
8866	GOMF_ACTIN_FILAMENT_BINDING	0.00844563	0.101424	0.38073	-0.406	-1.39556	209
2764	GOBP_NATURAL_KILLER_CELL_MEDIATED_IMMUNITY	0.00849234	0.10187	0.38073	-0.517326	-1.53885	66
4725	GOBP_POSITIVE_REGULATION_OF_PLATELET_ACTIVATION	0.0085474	0.102415	0.38073	-0.791979	-1.69588	12
9220	GOMF_DEOXYRIBONUCLEOTIDE_BINDING	0.00856552	0.102516	0.38073	0.861172	1.62467	6
5699	GOBP_REGULATION_OF_DENDRITE_DEVELOPMENT	0.00861287	0.102852	0.38073	-0.455952	-1.47878	126
7720	GOBP_VIRAL_RNA_GENOME_REPLICATION	0.00860947	0.102852	0.38073	0.602482	1.63577	26
6056	GOBP_REGULATION_OF_MAST_CELL_ACTIVATION	0.00862592	0.102892	0.38073	-0.570238	-1.62681	51
206	GOBP_ANTIGEN_PROCESSING_AND_PRESENTATION_OF_EXOGENOUS_PEPTIDE_ANTIGEN_VIA_MHC_CLASS_I	0.00867618	0.103307	0.38073	0.75336	1.64833	11
1151	GOBP_DGMP_METABOLIC_PROCESS	0.00868429	0.103307	0.38073	0.772687	1.62444	10
3605	GOBP_NEUROTRANSMITTER_REUPTAKE	0.00869639	0.103307	0.38073	-0.623219	-1.63989	31
8801	GOCC_VOLTAGE_GATED_SODIUM_CHANNEL_COMPLEX	0.0086995	0.103307	0.38073	-0.712191	-1.61261	17
2125	GOBP_KIDNEY_EPITHELIUM_DEVELOPMENT	0.00874249	0.103646	0.38073	-0.440498	-1.47051	151
7218	GOBP_SOMATIC_STEM_CELL_POPULATION_MAINTENANCE	0.0087476	0.103646	0.38073	-0.495141	-1.5324	83
7478	GOBP_TRANSCRIPTION_PREINITIATION_COMPLEX_ASSEMBLY	0.00879065	0.104041	0.38073	0.464988	1.54091	62
976	GOBP_CORNIFICATION	0.00892938	0.105331	0.38073	0.889522	1.59225	5
1285	GOBP_EMBRYONIC_HEART_TUBE_DEVELOPMENT	0.00892139	0.105331	0.38073	-0.484431	-1.50554	90
1613	GOBP_G2_MI_TRANSITION_OF_MEIOTIC_CELL_CYCLE	0.00892938	0.105331	0.38073	0.88985	1.59283	5
6328	GOBP_REGULATION_OF_POTASSIUM_ION_EXPORT_ACROSS_PLASMA_MEMBRANE	0.0089586	0.105442	0.38073	-0.88682	-1.61607	6
6339	GOBP_REGULATION_OF_PROSTATIC_BUD_FORMATION	0.0089586	0.105442	0.38073	-0.887799	-1.61785	6
5490	GOBP_REGULATION_OF_BIOLOGICAL_PROCESS_INVOLVED_IN_SYMBIOTIC_INTERACTION	0.00899871	0.1057	0.38073	0.463416	1.5357	62
5628	GOBP_REGULATION_OF_CELL_PROJECTION_ASSEMBLY	0.00900043	0.1057	0.38073	-0.419438	-1.42631	189
10501	GOMF_UDP_XYLOSYLTRANSFERASE_ACTIVITY	0.00902031	0.105817	0.38073	0.859833	1.62214	6
1725	GOBP_GLYCOPROTEIN_METABOLIC_PROCESS	0.00903738	0.105901	0.38073	-0.375062	-1.34337	326
3720	GOBP_NUCLEOTIDE_BINDING_OLIGOMERIZATION_DOMAIN_CONTAINING_2_SIGNALING_PATHWAY	0.00905973	0.106046	0.38073	0.726502	1.67379	13
2239	GOBP_LONG_TERM_SYNAPTIC_POTENTIATION	0.00916888	0.106989	0.38073	-0.479382	-1.53359	109
5400	GOBP_REGULATION_OF_ACROSOME_REACTION	0.0091744	0.106989	0.38073	-0.734513	-1.63233	15
6438	GOBP_REGULATION_OF_RESPONSE_TO_OSMOTIC_STRESS	0.0091744	0.106989	0.38073	-0.733633	-1.63037	15
9078	GOMF_CASPASE_BINDING	0.00918052	0.106989	0.38073	0.772089	1.62318	10
7087	GOBP_SENSORY_ORGAN_DEVELOPMENT	0.00919521	0.107043	0.38073	-0.345569	-1.28112	604
6005	GOBP_REGULATION_OF_LEUKOCYTE_PROLIFERATION	0.00930449	0.108197	0.38073	-0.387041	-1.35961	262
2702	GOBP_MUSCLE_CELL_DIFFERENTIATION	0.00931788	0.108215	0.38073	-0.367359	-1.33801	400
3718	GOBP_NUCLEOTIDE_BINDING_DOMAIN_LEUCINE_RICH_REPEAT_CONTAINING_RECEPTOR_SIGNALING_PATHWAY	0.00932638	0.108215	0.38073	0.682436	1.64654	16
4358	GOBP_POSITIVE_REGULATION_OF_FAT_CELL_DIFFERENTIATION	0.00941868	0.109166	0.38073	-0.535072	-1.59303	67
7517	GOBP_TRIGLYCERIDE_BIOSYNTHETIC_PROCESS	0.00944488	0.109351	0.38073	0.541896	1.62228	37
372	GOBP_BONE_RESORPTION	0.00947066	0.1095	0.38073	-0.512345	-1.56771	76
701	GOBP_CELLULAR_RESPONSE_TO_XENOBIOTIC_STIMULUS	0.00948058	0.1095	0.38073	-0.463573	-1.4835	110
2684	GOBP_MULTICELLULAR_ORGANISMAL_HOMEOSTASIS	0.009519	0.1095	0.38073	-0.34231	-1.26317	526
5820	GOBP_REGULATION_OF_FIBROBLAST_GROWTH_FACTOR_RECEPTOR_SIGNALING_PATHWAY	0.00951948	0.1095	0.38073	-0.63278	-1.67277	33
6390	GOBP_REGULATION_OF_PROTEIN_POLYMERIZATION	0.00949936	0.1095	0.38073	-0.429866	-1.46034	188
8203	GOCC_HISTONE_METHYLTRANSFERASE_COMPLEX	0.00949484	0.1095	0.38073	0.456476	1.51878	63
184	GOBP_ANION_HOMEOSTASIS	0.00959104	0.109966	0.38073	-0.547524	-1.56997	53
974	GOBP_COPULATION	0.00958273	0.109966	0.38073	-0.665276	-1.63219	24
5493	GOBP_REGULATION_OF_BLOOD_CIRCULATION	0.0095903	0.109966	0.38073	-0.393876	-1.38698	264
6784	GOBP_RESPONSE_TO_CORTICOSTERONE	0.00961168	0.109966	0.38073	-0.952412	-1.5105	3
9228	GOMF_DINITROSYL_IRON_COMPLEX_BINDING	0.00961168	0.109966	0.38073	-0.952819	-1.51114	3
10320	GOMF_STAT_FAMILY_PROTEIN_BINDING	0.00963394	0.110102	0.38073	0.791788	1.60521	9
10116	GOMF_PROTEIN_DOMAIN_SPECIFIC_BINDING	0.00968053	0.110516	0.38073	-0.330203	-1.23815	789
5585	GOBP_REGULATION_OF_CELLULAR_RESPONSE_TO_GROWTH_FACTOR_STIMULUS	0.00978492	0.111349	0.38073	-0.385372	-1.36837	296
7651	GOBP_VASCULAR_ASSOCIATED_SMOOTH_MUSCLE_CELL_MIGRATION	0.00976514	0.111349	0.38073	-0.615307	-1.63861	35
8234	GOCC_INTERMEDIATE_DENSITY_LIPOPROTEIN_PARTICLE	0.0097783	0.111349	0.38073	0.857001	1.6168	6
1808	GOBP_HEART_VALVE_MORPHOGENESIS	0.00984829	0.111831	0.38073	-0.569837	-1.60074	46
6207	GOBP_REGULATION_OF_NEUTROPHIL_DEGRANULATION	0.00984216	0.111831	0.38073	0.768299	1.61521	10
759	GOBP_CELL_JUNCTION_DISASSEMBLY	0.00990379	0.112143	0.38073	-0.680992	-1.61219	21
4014	GOBP_PLASMA_MEMBRANE_PHOSPHOLIPID_SCRAMBLING	0.00990379	0.112143	0.38073	-0.681104	-1.61245	21
5610	GOBP_REGULATION_OF_CELL_CYCLE_PROCESS	0.00990736	0.112143	0.38073	0.283687	1.2076	644
3655	GOBP_NOREPINEPHRINE_TRANSPORT	0.00996148	0.112602	0.38073	-0.639941	-1.63342	28
4330	GOBP_POSITIVE_REGULATION_OF_EPITHELIAL_TO_MESENCHYMAL_TRANSITION	0.00996912	0.112602	0.38073	-0.566476	-1.60605	49
3554	GOBP_NEUROENDOCRINE_CELL_DIFFERENTIATION	0.0100327	0.11308	0.38073	-0.714272	-1.59936	16
8392	GOCC_NEUROMUSCULAR_JUNCTION	0.0100308	0.11308	0.38073	-0.47075	-1.48151	98
4955	GOBP_POSITIVE_REGULATION_OF_T_CELL_PROLIFERATION	0.0100902	0.113368	0.38073	-0.478052	-1.51184	102
8237	GOCC_INTERSTITIAL_MATRIX	0.0100853	0.113368	0.38073	-0.729485	-1.62116	15
10527	GOMF_VOLTAGE_GATED_CATION_CHANNEL_ACTIVITY	0.010082	0.113368	0.38073	-0.436367	-1.45446	149
2655	GOBP_MORPHOGENESIS_OF_EMBRYONIC_EPITHELIUM	0.010138	0.113785	0.38073	-0.418117	-1.41455	181
9486	GOMF_HORMONE_BINDING	0.0102185	0.114568	0.38073	0.438979	1.50646	85
7622	GOBP_UREA_TRANSMEMBRANE_TRANSPORT	0.0102696	0.115019	0.38073	-0.880727	-1.60497	6
10533	GOMF_VOLTAGE_GATED_POTASSIUM_CHANNEL_ACTIVITY_INVOLVED_IN_VENTRICULAR_CARDIAC_MUSCLE_CELL_ACTION_POTENTIAL_REPOLARIZATION	0.0103159	0.115416	0.38073	-0.801723	-1.64924	10
1009	GOBP_CYCLIC_NUCLEOTIDE_METABOLIC_PROCESS	0.0103793	0.115647	0.38073	-0.625176	-1.61368	29
1124	GOBP_DETECTION_OF_VISIBLE_LIGHT	0.0103793	0.115647	0.38073	-0.612219	-1.61575	32
3978	GOBP_PHOSPHOLIPID_TRANSPORT	0.0103776	0.115647	0.38073	-0.490819	-1.51903	83
8837	GOMF_4_IRON_4_SULFUR_CLUSTER_BINDING	0.01038	0.115647	0.38073	0.536105	1.60494	37
283	GOBP_ATTACHMENT_OF_MITOTIC_SPINDLE_MICROTUBULES_TO_KINETOCHORE	0.0103927	0.115668	0.38073	0.649691	1.63988	19
8712	GOCC_SUPRAMOLECULAR_POLYMER	0.0104137	0.115781	0.38073	-0.331768	-1.24647	863
3345	GOBP_NEGATIVE_REGULATION_OF_PROTEIN_POLYMERIZATION	0.0104676	0.116218	0.38073	-0.505898	-1.54735	77
6789	GOBP_RESPONSE_TO_DOPAMINE	0.0104749	0.116218	0.38073	-0.548513	-1.58562	56
128	GOBP_AMIDE_TRANSPORT	0.0104941	0.116291	0.38073	-0.379581	-1.35878	322
5221	GOBP_PROTEIN_MONOUBIQUITINATION	0.0105084	0.116291	0.38073	0.43675	1.46621	78
6500	GOBP_REGULATION_OF_SMOOTH_MUSCLE_CELL_MATRIX_ADHESION	0.0105182	0.116291	0.38073	-0.880857	-1.53946	5
7012	GOBP_RNA_3_END_PROCESSING	0.0105252	0.116291	0.38073	0.418267	1.46482	92
1092	GOBP_DEOXYRIBONUCLEOTIDE_METABOLIC_PROCESS	0.0105646	0.116605	0.38073	0.514819	1.5793	43
6570	GOBP_REGULATION_OF_SYSTEMIC_ARTERIAL_BLOOD_PRESSURE_MEDIATED_BY_A_CHEMICAL_SIGNAL	0.010608	0.116963	0.38073	-0.57606	-1.64183	50
5736	GOBP_REGULATION_OF_DNA_TEMPLATED_DNA_REPLICATION_INITIATION	0.0106222	0.116981	0.38073	0.746226	1.63272	11
6890	GOBP_RESPONSE_TO_OXYGEN_CONTAINING_COMPOUND	0.0106316	0.116981	0.38073	-0.314731	-1.1984	1362
7631	GOBP_UROGENITAL_SYSTEM_DEVELOPMENT	0.0106611	0.117184	0.38073	-0.366022	-1.32068	364
8305	GOCC_MAST_CELL_GRANULE	0.0107066	0.117441	0.38073	-0.879035	-1.60188	6
8908	GOMF_ALPHA_ADRENERGIC_RECEPTOR_ACTIVITY	0.0107066	0.117441	0.38073	-0.879075	-1.60196	6
7183	GOBP_SMOOTH_MUSCLE_CELL_DIFFERENTIATION	0.0107219	0.117488	0.38073	-0.496991	-1.51318	75
489	GOBP_CARDIAC_MUSCLE_CELL_MEMBRANE_REPOLARIZATION	0.010764	0.117829	0.38073	-0.617457	-1.62473	31
4756	GOBP_POSITIVE_REGULATION_OF_PROTEIN_KINASE_B_SIGNALING	0.0107965	0.117978	0.38073	-0.475414	-1.52089	109
8107	GOCC_EXCITATORY_SYNAPSE	0.0107999	0.117978	0.38073	-0.505404	-1.54584	77
476	GOBP_CARDIAC_CONDUCTION	0.0108385	0.118168	0.38073	-0.513826	-1.534	69
2624	GOBP_MONOACYLGLYCEROL_BIOSYNTHETIC_PROCESS	0.0108395	0.118168	0.38073	0.852757	1.60879	6
24	GOBP_ACTIN_CYTOSKELETON_REORGANIZATION	0.010905	0.118566	0.38073	-0.474982	-1.51951	109
643	GOBP_CELLULAR_RESPONSE_TO_INTERFERON_GAMMA	0.0109293	0.118566	0.38073	0.410124	1.46519	102
871	GOBP_CHONDROCYTE_DIFFERENTIATION	0.010918	0.118566	0.38073	-0.472087	-1.51975	113
4345	GOBP_POSITIVE_REGULATION_OF_EXOCYTOSIS	0.0109369	0.118566	0.38073	-0.478507	-1.50606	97
8894	GOMF_ADRENERGIC_RECEPTOR_BINDING	0.0109428	0.118566	0.38073	-0.659132	-1.61712	24
9435	GOMF_G_PROTEIN_COUPLED_RECEPTOR_ACTIVITY	0.0109274	0.118566	0.38073	-0.380371	-1.36812	347
3494	GOBP_NEGATIVE_REGULATION_OF_T_HELPER_1_TYPE_IMMUNE_RESPONSE	0.0109595	0.118626	0.38073	-0.879952	-1.53788	5
2885	GOBP_NEGATIVE_REGULATION_OF_CELL_CYCLE	0.0109763	0.118687	0.38073	0.304921	1.24079	336
2451	GOBP_MESENCHYMAL_CELL_MIGRATION	0.0110001	0.118824	0.38073	-0.510204	-1.51767	66
484	GOBP_CARDIAC_MUSCLE_CELL_ACTION_POTENTIAL_INVOLVED_IN_CONTRACTION	0.0110165	0.11888	0.38073	-0.574332	-1.58895	42
1486	GOBP_EXOCRINE_SYSTEM_DEVELOPMENT	0.0111654	0.120197	0.38073	-0.535138	-1.54173	54
2444	GOBP_MEMORY	0.0111904	0.120197	0.38073	-0.42831	-1.43036	153
4735	GOBP_POSITIVE_REGULATION_OF_PROGRAMMED_NECROTIC_CELL_DEATH	0.0111804	0.120197	0.38073	0.884517	1.58329	5
7264	GOBP_SPINDLE_MIDZONE_ASSEMBLY	0.0111655	0.120197	0.38073	0.764954	1.60818	10
8567	GOCC_PROTEIN_DNA_COMPLEX	0.011195	0.120197	0.38073	0.376089	1.39349	143
3995	GOBP_PIGMENT_CELL_DIFFERENTIATION	0.0112763	0.120948	0.38073	-0.609131	-1.63405	37
7337	GOBP_SUPPRESSION_OF_VIRAL_RELEASE_BY_HOST	0.0113194	0.121288	0.38073	0.643554	1.6425	20
6780	GOBP_RESPONSE_TO_COCAINE	0.0113351	0.121334	0.38073	-0.581861	-1.59572	41
3629	GOBP_NEUTROPHIL_MIGRATION	0.0113812	0.121583	0.38073	0.38484	1.41015	123
9448	GOMF_HEMOGLOBIN_ALPHA_BINDING	0.0113783	0.121583	0.38073	-0.996737	-1.33918	1
5265	GOBP_PROTEOGLYCAN_METABOLIC_PROCESS	0.0114146	0.121817	0.38073	-0.496492	-1.54084	88
497	GOBP_CARDIAC_NEURAL_CREST_CELL_DIFFERENTIATION_INVOLVED_IN_HEART_DEVELOPMENT	0.0114271	0.121828	0.38073	-0.696532	-1.61984	19
634	GOBP_CELLULAR_RESPONSE_TO_HORMONE_STIMULUS	0.0114619	0.121955	0.38073	-0.356157	-1.3057	461
6715	GOBP_RENAL_SYSTEM_PROCESS	0.0114507	0.121955	0.38073	-0.45423	-1.46562	122
3450	GOBP_NEGATIVE_REGULATION_OF_TOLL_LIKE_RECEPTOR_2_SIGNALING_PATHWAY	0.0114806	0.121963	0.38073	0.881863	1.57854	5
7556	GOBP_TUMOR_NECROSIS_FACTOR_SUPERFAMILY_CYTOKINE_PRODUCTION	0.0114856	0.121963	0.38073	0.348969	1.32501	179
1183	GOBP_DNA_CONFORMATION_CHANGE	0.0115038	0.122035	0.38073	0.47335	1.52294	53
6754	GOBP_RESPONSE_TO_AMINE	0.0115244	0.122131	0.38073	-0.661161	-1.58163	22
4332	GOBP_POSITIVE_REGULATION_OF_EPITHELIAL_TUBE_FORMATION	0.0115714	0.122386	0.38073	-0.805982	-1.61025	9
7872	GOCC_CAJAL_BODY	0.0115602	0.122386	0.38073	0.53901	1.54153	32
2716	GOBP_MYD88_INDEPENDENT_TOLL_LIKE_RECEPTOR_SIGNALING_PATHWAY	0.0116715	0.123199	0.38073	0.717542	1.65315	13
6248	GOBP_REGULATION_OF_OSSIFICATION	0.0116619	0.123199	0.38073	-0.439961	-1.42749	127
3796	GOBP_ORGANIC_CYCLIC_COMPOUND_CATABOLIC_PROCESS	0.0118457	0.124784	0.38073	0.297417	1.22976	415
6162	GOBP_REGULATION_OF_MYELOID_CELL_DIFFERENTIATION	0.0118568	0.124784	0.38073	-0.408411	-1.40021	206
6544	GOBP_REGULATION_OF_SYNAPSE_STRUCTURE_OR_ACTIVITY	0.0118455	0.124784	0.38073	-0.391984	-1.37	254
4003	GOBP_PITUITARY_GLAND_DEVELOPMENT	0.0118832	0.124938	0.38073	-0.590112	-1.60037	39
1139	GOBP_DEVELOPMENTAL_PIGMENTATION	0.0119265	0.125247	0.38073	-0.572388	-1.63136	50
2019	GOBP_INTERFERON_ALPHA_PRODUCTION	0.0119361	0.125247	0.38073	0.577523	1.67114	33
5263	GOBP_PROTEOGLYCAN_BIOSYNTHETIC_PROCESS	0.0119641	0.125416	0.38073	-0.548102	-1.60065	58
5470	GOBP_REGULATION_OF_ATRIAL_CARDIAC_MUSCLE_CELL_MEMBRANE_DEPOLARIZATION	0.0119774	0.125433	0.38073	-0.80426	-1.60681	9
2478	GOBP_METANEPHRIC_EPITHELIUM_DEVELOPMENT	0.0119959	0.125463	0.38073	-0.649192	-1.6155	25
5888	GOBP_REGULATION_OF_HEART_RATE_BY_CARDIAC_CONDUCTION	0.0120039	0.125463	0.38073	-0.58977	-1.59944	39
2906	GOBP_NEGATIVE_REGULATION_OF_CELL_PROLIFERATION_INVOLVED_IN_KIDNEY_DEVELOPMENT	0.0120176	0.125483	0.38073	-0.874186	-1.59305	6
1537	GOBP_FATTY_ACYL_COA_METABOLIC_PROCESS	0.0121195	0.126053	0.38073	0.670267	1.64434	17
3622	GOBP_NEUTROPHIL_EXTRAVASATION	0.0121041	0.126053	0.38073	0.707768	1.6653	14
5158	GOBP_PROTEIN_KINASE_B_SIGNALING	0.0121121	0.126053	0.38073	-0.414001	-1.41265	193
7069	GOBP_SECONDARY_METABOLIC_PROCESS	0.0120884	0.126053	0.38073	-0.572233	-1.58315	42
204	GOBP_ANTIGEN_PROCESSING_AND_PRESENTATION_OF_EXOGENOUS_ANTIGEN	0.0122167	0.126157	0.38073	0.579292	1.63095	30
2268	GOBP_LYMPHOCYTE_MIGRATION	0.0122287	0.126157	0.38073	-0.466358	-1.46769	98
2510	GOBP_MICROTUBULE_BASED_PROTEIN_TRANSPORT	0.0122481	0.126157	0.38073	-0.748034	-1.63934	14
3081	GOBP_NEGATIVE_REGULATION_OF_IMMATURE_T_CELL_PROLIFERATION	0.0121632	0.126157	0.38073	-0.873207	-1.59126	6
3309	GOBP_NEGATIVE_REGULATION_OF_PLATELET_AGGREGATION	0.0122481	0.126157	0.38073	-0.748079	-1.63944	14
4259	GOBP_POSITIVE_REGULATION_OF_CYTOKINE_PRODUCTION	0.0122146	0.126157	0.38073	0.289307	1.20828	448
7148	GOBP_SKELETAL_MUSCLE_CELL_PROLIFERATION	0.0122316	0.126157	0.38073	-0.700837	-1.5869	17
7280	GOBP_STEM_CELL_DEVELOPMENT	0.0121749	0.126157	0.38073	-0.477849	-1.50148	96
9095	GOMF_CD4_RECEPTOR_BINDING	0.0122037	0.126157	0.38073	-0.795307	-1.63604	10
9539	GOMF_INTEGRIN_BINDING	0.0122108	0.126157	0.38073	-0.43684	-1.44287	141
3490	GOBP_NEGATIVE_REGULATION_OF_T_CELL_MIGRATION	0.0122834	0.126236	0.38073	-0.875871	-1.53075	5
4030	GOBP_PLATELET_MORPHOGENESIS	0.01228	0.126236	0.38073	-0.680178	-1.58589	20
6176	GOBP_REGULATION_OF_NATURAL_KILLER_CELL_DIFFERENTIATION	0.0122914	0.126236	0.38073	0.66887	1.64091	17
5994	GOBP_REGULATION_OF_LAMELLIPODIUM_ASSEMBLY	0.012305	0.126253	0.38073	-0.584881	-1.57796	38
9072	GOMF_CARBOXY_LYASE_ACTIVITY	0.0123446	0.126538	0.38073	-0.620141	-1.60068	29
6055	GOBP_REGULATION_OF_MAP_KINASE_ACTIVITY	0.0124996	0.128004	0.38073	-0.41316	-1.40978	193
193	GOBP_ANTEROGRADE_AXONAL_PROTEIN_TRANSPORT	0.0125226	0.128012	0.38073	-0.826955	-1.59372	8
9250	GOMF_DNA_POLYMERASE_BINDING	0.0125245	0.128012	0.38073	0.641963	1.62037	19
2592	GOBP_MITOTIC_DNA_INTEGRITY_CHECKPOINT_SIGNALING	0.0125542	0.128193	0.38073	0.442934	1.48305	74
6523	GOBP_REGULATION_OF_STEM_CELL_PROLIFERATION	0.0125767	0.128299	0.38073	-0.476277	-1.49905	97
1312	GOBP_ENDOCARDIAL_CUSHION_FORMATION	0.0125896	0.128308	0.38073	-0.611321	-1.60858	31
2574	GOBP_MITOCHONDRIAL_TRANSMEMBRANE_TRANSPORT	0.0126905	0.129212	0.38073	0.438369	1.47174	71
751	GOBP_CELL_DIVISION	0.0127361	0.129428	0.38073	0.277904	1.17734	571
2159	GOBP_LENS_FIBER_CELL_DIFFERENTIATION	0.0127353	0.129428	0.38073	-0.58662	-1.5704	36
942	GOBP_COLUMNAR_CUBOIDAL_EPITHELIAL_CELL_DIFFERENTIATION	0.0127483	0.129429	0.38073	-0.438192	-1.42318	128
2645	GOBP_MONOUBIQUITINATED_PROTEIN_DEUBIQUITINATION	0.0127849	0.129583	0.38073	0.577963	1.62721	30
5642	GOBP_REGULATION_OF_CHEMOTAXIS	0.0127878	0.129583	0.38073	-0.398253	-1.37129	218
6002	GOBP_REGULATION_OF_LEUKOCYTE_DIFFERENTIATION	0.0128261	0.129847	0.38073	-0.376562	-1.34797	322
5738	GOBP_REGULATION_OF_DNA_TEMPLATED_TRANSCRIPTION_INITIATION	0.0129008	0.13048	0.38073	0.431077	1.44716	78
3535	GOBP_NEURAL_CREST_CELL_DIFFERENTIATION	0.0129661	0.130832	0.38073	-0.470742	-1.48872	102
4064	GOBP_POSITIVE_REGULATION_OF_ACROSOME_REACTION	0.0129543	0.130832	0.38073	-0.784083	-1.63784	11
4607	GOBP_POSITIVE_REGULATION_OF_MORPHOGENESIS_OF_AN_EPITHELIUM	0.0129725	0.130832	0.38073	-0.585902	-1.58895	39
2224	GOBP_LOCALIZATION_WITHIN_MEMBRANE	0.0130057	0.130919	0.38073	-0.343434	-1.27367	623
3797	GOBP_ORGANIC_HYDROXY_COMPOUND_BIOSYNTHETIC_PROCESS	0.0129968	0.130919	0.38073	-0.405769	-1.39377	213
3595	GOBP_NEUROTRANSMITTER_CATABOLIC_PROCESS	0.0130914	0.131657	0.38073	-0.783975	-1.63762	11
1294	GOBP_EMBRYONIC_ORGAN_MORPHOGENESIS	0.0131848	0.132111	0.38073	-0.373336	-1.33634	323
7092	GOBP_SENSORY_PERCEPTION_OF_MECHANICAL_STIMULUS	0.0131491	0.132111	0.38073	-0.410709	-1.39397	183
9129	GOMF_CILIARY_NEUROTROPHIC_FACTOR_RECEPTOR_ACTIVITY	0.0131863	0.132111	0.38073	0.815164	1.57374	7
9390	GOMF_GLUTAMATE_RECEPTOR_BINDING	0.0131738	0.132111	0.38073	-0.50662	-1.507	66
2646	GOBP_MONOVALENT_INORGANIC_ANION_HOMEOSTASIS	0.013215	0.132274	0.38073	-0.642584	-1.62254	26
1568	GOBP_FLOOR_PLATE_DEVELOPMENT	0.0132825	0.132576	0.38073	-0.792409	-1.63008	10
4848	GOBP_POSITIVE_REGULATION_OF_SMALL_GTPASE_MEDIATED_SIGNAL_TRANSDUCTION	0.0132809	0.132576	0.38073	-0.504986	-1.52062	72
7431	GOBP_THYROID_STIMULATING_HORMONE_SECRETION	0.0132814	0.132576	0.38073	0.875044	1.56633	5
4783	GOBP_POSITIVE_REGULATION_OF_PROTEIN_TYROSINE_KINASE_ACTIVITY	0.0133667	0.133196	0.38073	-0.5705	-1.5837	44
10552	MP_DECREASED_INCIDENCE_OF_TUMORS_BY_CHEMICAL_INDUCTION	0.0133697	0.133196	0.38073	-0.478215	-1.48302	87
733	GOBP_CELL_COMMUNICATION_INVOLVED_IN_CARDIAC_CONDUCTION	0.0134357	0.133729	0.38073	-0.557767	-1.54906	43
237	GOBP_APPENDAGE_DEVELOPMENT	0.0134686	0.13393	0.38073	-0.411257	-1.40329	193
3935	GOBP_PHAGOCYTOSIS	0.0135515	0.134025	0.38073	0.331749	1.30675	228
4229	GOBP_POSITIVE_REGULATION_OF_CHONDROCYTE_DIFFERENTIATION	0.0135662	0.134025	0.38073	-0.664251	-1.57255	21
6382	GOBP_REGULATION_OF_PROTEIN_LOCALIZATION_TO_SYNAPSE	0.0135443	0.134025	0.38073	-0.65164	-1.59873	24
7974	GOCC_CONDENSED_NUCLEAR_CHROMOSOME	0.0135635	0.134025	0.38073	0.438603	1.47364	72
8186	GOCC_GROWTH_FACTOR_COMPLEX	0.0135403	0.134025	0.38073	-0.83914	-1.56466	7
9087	GOMF_CATION_CHLORIDE_SYMPORTER_ACTIVITY	0.0135433	0.134025	0.38073	-0.674634	-1.57296	20
9965	GOMF_PEPTIDE_HORMONE_RECEPTOR_BINDING	0.0135433	0.134025	0.38073	-0.675888	-1.57589	20
1143	GOBP_DEVELOPMENT_OF_PRIMARY_SEXUAL_CHARACTERISTICS	0.0136271	0.134501	0.38073	-0.399108	-1.3714	216
777	GOBP_CELL_PROJECTION_ASSEMBLY	0.0136857	0.134594	0.38073	-0.352328	-1.29503	481
1166	GOBP_DIET_INDUCED_THERMOGENESIS	0.0136844	0.134594	0.38073	0.669731	1.61588	16
2897	GOBP_NEGATIVE_REGULATION_OF_CELL_GROWTH_INVOLVED_IN_CARDIAC_MUSCLE_CELL_DEVELOPMENT	0.013677	0.134594	0.38073	0.725579	1.63236	12
6178	GOBP_REGULATION_OF_NATURAL_KILLER_CELL_MEDIATED_IMMUNE_RESPONSE_TO_TUMOR_CELL	0.013687	0.134594	0.38073	-0.78935	-1.62378	10
2438	GOBP_MEMBRANE_REPOLARIZATION_DURING_ACTION_POTENTIAL	0.0137291	0.134709	0.38073	-0.689365	-1.60317	19
9524	GOMF_INOSITOL_1_4_5_TRISPHOSPHATE_BINDING	0.0137368	0.134709	0.38073	-0.74459	-1.6318	14
10028	GOMF_PHOSPHOLIPASE_A1_ACTIVITY	0.0137199	0.134709	0.38073	0.845586	1.59527	6
9860	GOMF_N_ACETYLGLUCOSAMINE_6_O_SULFOTRANSFERASE_ACTIVITY	0.0137656	0.134867	0.38073	-0.868876	-1.58337	6
1306	GOBP_EMBRYO_DEVELOPMENT_ENDING_IN_BIRTH_OR_EGG_HATCHING	0.0137964	0.135045	0.38073	-0.324755	-1.21814	816
1553	GOBP_FEMALE_MEIOSIS_I	0.0138655	0.135472	0.38073	0.737443	1.6135	11
2330	GOBP_MAINTENANCE_OF_PROTEIN_LOCATION_IN_NUCLEUS	0.0138549	0.135472	0.38073	0.615254	1.60996	22
77	GOBP_ADENYLATE_CYCLASE_ACTIVATING_DOPAMINE_RECEPTOR_SIGNALING_PATHWAY	0.0139139	0.135726	0.38073	-0.780989	-1.63138	11
7849	GOCC_BASEMENT_MEMBRANE	0.0139245	0.135726	0.38073	-0.451699	-1.45186	115
8545	GOCC_PRESYNAPTIC_ACTIVE_ZONE	0.0139298	0.135726	0.38073	-0.474384	-1.49059	96
5077	GOBP_PROSTANOID_CATABOLIC_PROCESS	0.0139659	0.135953	0.38073	-0.909437	-1.52186	4
2320	GOBP_MAINTENANCE_OF_LOCATION	0.0139862	0.136027	0.38073	-0.37938	-1.35218	301
3008	GOBP_NEGATIVE_REGULATION_OF_EXTRINSIC_APOPTOTIC_SIGNALING_PATHWAY	0.0141371	0.137368	0.38073	-0.473129	-1.46781	91
6990	GOBP_RIBONUCLEOPROTEIN_COMPLEX_SUBUNIT_ORGANIZATION	0.0141944	0.137685	0.38073	0.350228	1.33406	161
8915	GOMF_AMIDE_TRANSMEMBRANE_TRANSPORTER_ACTIVITY	0.0141955	0.137685	0.38073	-0.618473	-1.63494	33
8338	GOCC_MICROVILLUS_MEMBRANE	0.014219	0.137787	0.38073	-0.651671	-1.58857	23
7145	GOBP_SKELETAL_MUSCLE_ACETYLCHOLINE_GATED_CHANNEL_CLUSTERING	0.014245	0.137913	0.38073	0.701477	1.65049	14
4648	GOBP_POSITIVE_REGULATION_OF_NEURON_DIFFERENTIATION	0.0143356	0.138665	0.38073	-0.441601	-1.42079	114
3129	GOBP_NEGATIVE_REGULATION_OF_LAMELLIPODIUM_ASSEMBLY	0.01449	0.139777	0.38073	-0.869627	-1.51983	5
3151	GOBP_NEGATIVE_REGULATION_OF_LIPOPROTEIN_METABOLIC_PROCESS	0.01449	0.139777	0.38073	-0.869674	-1.51992	5
4559	GOBP_POSITIVE_REGULATION_OF_MAST_CELL_CYTOKINE_PRODUCTION	0.01449	0.139777	0.38073	-0.87016	-1.52077	5
329	GOBP_BEHAVIORAL_RESPONSE_TO_COCAINE	0.0145558	0.140157	0.38073	-0.669938	-1.56201	20
8342	GOCC_MITOCHONDRIAL_CRISTA	0.0145528	0.140157	0.38073	-0.741594	-1.62523	14
7672	GOBP_VENTRICULAR_CARDIAC_MUSCLE_CELL_ACTION_POTENTIAL	0.0146169	0.140618	0.38073	-0.623527	-1.59152	28
2128	GOBP_KILLING_BY_HOST_OF_SYMBIONT_CELLS	0.0147185	0.141468	0.38073	0.617353	1.63685	23
276	GOBP_ATRIAL_SEPTUM_MORPHOGENESIS	0.0147778	0.141741	0.38073	-0.71246	-1.58332	15
7115	GOBP_SEROTONIN_SECRETION	0.0147778	0.141741	0.38073	-0.713218	-1.585	15
10368	GOMF_SYNTAXIN_1_BINDING	0.0147869	0.141741	0.38073	-0.647443	-1.58844	24
436	GOBP_CALCIUM_ION_TRANSPORT_INTO_CYTOSOL	0.0149361	0.142709	0.38073	-0.614785	-1.6252	33
5719	GOBP_REGULATION_OF_DNA_DAMAGE_CHECKPOINT	0.0149416	0.142709	0.38073	0.612544	1.60286	22
8547	GOCC_PRESYNAPTIC_ACTIVE_ZONE_MEMBRANE	0.0149369	0.142709	0.38073	-0.54226	-1.537	48
10300	GOMF_SODIUM_ION_TRANSMEMBRANE_TRANSPORTER_ACTIVITY	0.0149184	0.142709	0.38073	-0.438796	-1.42847	132
10170	GOMF_PURINE_DEOXYRIBONUCLEOTIDE_BINDING	0.0150231	0.143359	0.38073	0.901063	1.51078	4
4324	GOBP_POSITIVE_REGULATION_OF_EPITHELIAL_CELL_DIFFERENTIATION	0.0151013	0.143976	0.38073	-0.53363	-1.54596	55
7312	GOBP_STRIATED_MUSCLE_TISSUE_DEVELOPMENT	0.0151629	0.144435	0.38073	-0.379837	-1.33989	272
7432	GOBP_TIE_SIGNALING_PATHWAY	0.015227	0.144915	0.38073	-0.867907	-1.51683	5
5638	GOBP_REGULATION_OF_CENTROSOME_DUPLICATION	0.0152517	0.144983	0.38073	0.510234	1.56101	41
10218	GOMF_RNA_METHYLTRANSFERASE_ACTIVITY	0.0152614	0.144983	0.38073	0.485476	1.53139	47
53	GOBP_ACTIVATION_OF_PHOSPHOLIPASE_C_ACTIVITY	0.0153412	0.145223	0.38073	-0.656474	-1.55414	21
2236	GOBP_LONG_CHAIN_FATTY_ACYL_COA_METABOLIC_PROCESS	0.0153251	0.145223	0.38073	0.734232	1.60648	11
4409	GOBP_POSITIVE_REGULATION_OF_GTPASE_ACTIVITY	0.0153324	0.145223	0.38073	-0.388814	-1.35896	251
5709	GOBP_REGULATION_OF_DEOXYRIBONUCLEASE_ACTIVITY	0.0153264	0.145223	0.38073	-0.821882	-1.58395	8
2213	GOBP_LIPOPOLYSACCHARIDE_MEDIATED_SIGNALING_PATHWAY	0.0154902	0.14627	0.38073	0.467974	1.52053	57
6627	GOBP_REGULATION_OF_TRANSPORTER_ACTIVITY	0.0154924	0.14627	0.38073	-0.374937	-1.32979	294
10257	GOMF_SEQUENCE_SPECIFIC_MRNA_BINDING	0.0154931	0.14627	0.38073	0.67415	1.58582	15
2411	GOBP_MELANOCYTE_DIFFERENTIATION	0.0155231	0.146423	0.38073	-0.634097	-1.61157	27
824	GOBP_CEREBELLAR_GRANULAR_LAYER_MORPHOGENESIS	0.015556	0.146591	0.38073	-0.770781	-1.65049	12
4976	GOBP_POSITIVE_REGULATION_OF_VASCULAR_ENDOTHELIAL_CELL_PROLIFERATION	0.0155684	0.146591	0.38073	-0.663953	-1.54806	20
7848	GOCC_BASAL_PART_OF_CELL	0.0155993	0.146622	0.38073	-0.374712	-1.32519	277
9751	GOMF_MRNA_BINDING	0.0155883	0.146622	0.38073	0.318759	1.27857	287
3277	GOBP_NEGATIVE_REGULATION_OF_OSSIFICATION	0.0156144	0.146635	0.38073	-0.551341	-1.53121	43
2589	GOBP_MITOTIC_CHROMOSOME_CONDENSATION	0.0156662	0.146733	0.352488	0.672231	1.5813	15
6389	GOBP_REGULATION_OF_PROTEIN_PHOSPHORYLATION	0.015662	0.146733	0.352488	-0.322039	-1.21769	1040
10324	GOMF_STEROID_DELTA_ISOMERASE_ACTIVITY	0.0156635	0.146733	0.352488	-0.864199	-1.57485	6
5555	GOBP_REGULATION_OF_CARTILAGE_DEVELOPMENT	0.015718	0.147088	0.352488	-0.519855	-1.54773	67
6901	GOBP_RESPONSE_TO_PROGESTERONE	0.0157414	0.147178	0.352488	-0.678815	-1.55599	18
6074	GOBP_REGULATION_OF_MEMBRANE_LIPID_DISTRIBUTION	0.0158036	0.14763	0.352488	-0.532209	-1.54185	55
10191	GOMF_RECEPTOR_RECEPTOR_INTERACTION	0.0158183	0.147638	0.352488	-0.86713	-1.51547	5
144	GOBP_AMINO_ACID_TRANSPORT	0.0158705	0.147913	0.352488	-0.423208	-1.41439	155
3793	GOBP_ORGANIC_ACID_TRANSPORT	0.0158756	0.147913	0.352488	-0.369106	-1.31794	304
6594	GOBP_REGULATION_OF_TOLL_LIKE_RECEPTOR_9_SIGNALING_PATHWAY	0.0158918	0.147934	0.352488	0.766372	1.55369	9
8227	GOCC_INTEGRIN_COMPLEX	0.0159236	0.147971	0.352488	-0.61179	-1.61728	33
8566	GOCC_PROTEIN_COMPLEX_INVOLVED_IN_CELL_MATRIX_ADHESION	0.0159129	0.147971	0.352488	-0.739315	-1.62023	14
5856	GOBP_REGULATION_OF_GLUTAMATE_RECEPTOR_SIGNALING_PATHWAY	0.0159563	0.147987	0.352488	-0.863429	-1.57344	6
8450	GOCC_ORGANELLAR_RIBOSOME	0.015967	0.147987	0.352488	0.422032	1.43713	84
9001	GOMF_BETA_2_MICROGLOBULIN_BINDING	0.0159624	0.147987	0.352488	0.750431	1.57765	10
4466	GOBP_POSITIVE_REGULATION_OF_INTERFERON_ALPHA_PRODUCTION	0.0160309	0.14845	0.352488	0.589098	1.59251	25
8538	GOCC_PRECATALYTIC_SPLICEOSOME	0.0160491	0.148489	0.352488	0.482743	1.52277	47
6644	GOBP_REGULATION_OF_T_CELL_COSTIMULATION	0.016114	0.148958	0.352488	-0.866452	-1.51429	5
9723	GOMF_MISMATCH_REPAIR_COMPLEX_BINDING	0.0161278	0.148958	0.352488	0.750299	1.57737	10
6229	GOBP_REGULATION_OF_NUCLEASE_ACTIVITY	0.0162093	0.149581	0.352488	0.630422	1.60899	20
2780	GOBP_NEGATIVE_REGULATION_OF_ACTIN_FILAMENT_POLYMERIZATION	0.0162517	0.149805	0.352488	-0.510616	-1.50773	61
5631	GOBP_REGULATION_OF_CELL_PROLIFERATION_INVOLVED_IN_KIDNEY_DEVELOPMENT	0.0162617	0.149805	0.352488	-0.688642	-1.54197	16
442	GOBP_CAMKK_AMPK_SIGNALING_CASCADE	0.0162932	0.149906	0.352488	0.749121	1.5749	10
766	GOBP_CELL_MIGRATION_INVOLVED_IN_HEART_DEVELOPMENT	0.0163278	0.149906	0.352488	-0.658473	-1.53528	20
2402	GOBP_MEIOTIC_CHROMOSOME_CONDENSATION	0.0163016	0.149906	0.352488	0.841277	1.58714	6
8264	GOCC_ION_CHANNEL_COMPLEX	0.0163291	0.149906	0.352488	-0.377072	-1.33565	281
9368	GOMF_GAMMA_CATENIN_BINDING	0.0163676	0.150001	0.352488	-0.768467	-1.64554	12
10266	GOMF_SH2_DOMAIN_BINDING	0.0163634	0.150001	0.352488	-0.580873	-1.61645	45
3104	GOBP_NEGATIVE_REGULATION_OF_INTERLEUKIN_4_PRODUCTION	0.0163857	0.150038	0.352488	-0.834292	-1.55562	7
752	GOBP_CELL_FATE_COMMITMENT	0.0164314	0.150327	0.352488	-0.376323	-1.33693	288
1955	GOBP_IMMUNE_SYSTEM_DEVELOPMENT	0.0164614	0.150472	0.352488	-0.319558	-1.20848	1008
1971	GOBP_INDOLE_CONTAINING_COMPOUND_METABOLIC_PROCESS	0.0165264	0.150678	0.352488	-0.643282	-1.57823	24
2683	GOBP_MUCUS_SECRETION	0.0165219	0.150678	0.352488	-0.676682	-1.5511	18
7016	GOBP_RNA_CATABOLIC_PROCESS	0.0165107	0.150678	0.352488	0.333047	1.30953	239
1100	GOBP_DETECTION_OF_BIOTIC_STIMULUS	0.0166353	0.151411	0.352488	0.523372	1.4968	32
1659	GOBP_GLAND_MORPHOGENESIS	0.0166342	0.151411	0.352488	-0.430196	-1.43852	154
2456	GOBP_MESENCHYMAL_STEM_CELL_MAINTENANCE_INVOLVED_IN_NEPHRON_MORPHOGENESIS	0.0166706	0.151603	0.352488	-0.833886	-1.55486	7
5861	GOBP_REGULATION_OF_GLYCOGEN_STARCH_SYNTHASE_ACTIVITY	0.0167325	0.152036	0.352488	-0.819188	-1.57876	8
3552	GOBP_NEUROBLAST_MIGRATION	0.01678	0.152337	0.352488	0.807001	1.55798	7
4156	GOBP_POSITIVE_REGULATION_OF_CARTILAGE_DEVELOPMENT	0.0168278	0.152641	0.352488	-0.622643	-1.62385	30
9311	GOMF_EXONUCLEASE_ACTIVITY_ACTIVE_WITH_EITHER_RIBO_OR_DEOXYRIBONUCLEIC_ACIDS_AND_PRODUCING_5_PHOSPHOMONOESTERS	0.0168735	0.152925	0.352488	0.499385	1.56908	46
1182	GOBP_DNA_CATABOLIC_PROCESS_EXONUCLEOLYTIC	0.0170421	0.153357	0.352488	0.868098	1.5539	5
1635	GOBP_GASTRO_INTESTINAL_SYSTEM_SMOOTH_MUSCLE_CONTRACTION	0.0170009	0.153357	0.352488	-0.734695	-1.61011	14
1910	GOBP_HOMOPHILIC_CELL_ADHESION_VIA_PLASMA_MEMBRANE_ADHESION_MOLECULES	0.0170509	0.153357	0.352488	-0.455103	-1.44474	104
2467	GOBP_MESODERM_DEVELOPMENT	0.0170206	0.153357	0.352488	-0.447824	-1.43858	117
2594	GOBP_MITOTIC_DNA_REPLICATION_CHECKPOINT_SIGNALING	0.0170299	0.153357	0.352488	0.786159	1.57883	8
3652	GOBP_NOREPINEPHRINE_BIOSYNTHETIC_PROCESS	0.0170009	0.153357	0.352488	-0.79337	-1.58505	9
4233	GOBP_POSITIVE_REGULATION_OF_CHROMOSOME_CONDENSATION	0.0170421	0.153357	0.352488	0.866619	1.55125	5
6593	GOBP_REGULATION_OF_TOLL_LIKE_RECEPTOR_7_SIGNALING_PATHWAY	0.0170421	0.153357	0.352488	0.865722	1.54965	5
7814	GOCC_APICAL_PLASMA_MEMBRANE	0.0169887	0.153357	0.352488	-0.363296	-1.304	337
1354	GOBP_ENDOTHELIAL_CELL_DEVELOPMENT	0.0170686	0.153386	0.352488	-0.493152	-1.48049	71
8683	GOCC_SPECTRIN_ASSOCIATED_CYTOSKELETON	0.0171274	0.153785	0.352488	-0.861567	-1.57005	6
666	GOBP_CELLULAR_RESPONSE_TO_ORGANIC_CYCLIC_COMPOUND	0.0171694	0.153912	0.352488	-0.350143	-1.28093	435
1898	GOBP_HISTONE_MONOUBIQUITINATION	0.0171704	0.153912	0.352488	0.539762	1.58012	34
8145	GOCC_FILTRATION_DIAPHRAGM	0.0172729	0.1547	0.352488	-0.792583	-1.58348	9
1795	GOBP_HEAD_DEVELOPMENT	0.0173915	0.15524	0.352488	-0.332669	-1.2427	696
5996	GOBP_REGULATION_OF_LAMELLIPODIUM_ORGANIZATION	0.0173823	0.15524	0.352488	-0.550336	-1.55273	47
6588	GOBP_REGULATION_OF_TISSUE_REMODELING	0.0173632	0.15524	0.352488	-0.477219	-1.47694	83
8510	GOCC_PLASMA_MEMBRANE_SIGNALING_RECEPTOR_COMPLEX	0.0173669	0.15524	0.352488	-0.404891	-1.38085	192
6753	GOBP_RESPONSE_TO_ALKALOID	0.0174881	0.155971	0.352488	-0.480724	-1.46365	75
3440	GOBP_NEGATIVE_REGULATION_OF_SYNCYTIUM_FORMATION_BY_PLASMA_MEMBRANE_FUSION	0.0175203	0.156128	0.352488	0.838493	1.58188	6
1560	GOBP_FIBRINOLYSIS	0.0175935	0.156648	0.352488	-0.645415	-1.54396	22
4937	GOBP_POSITIVE_REGULATION_OF_TRIGLYCERIDE_BIOSYNTHETIC_PROCESS	0.0176938	0.15741	0.352488	0.647852	1.61805	18
2481	GOBP_METANEPHRIC_MESENCHYME_DEVELOPMENT	0.0177711	0.157834	0.352488	-0.770435	-1.60933	11
4321	GOBP_POSITIVE_REGULATION_OF_EPIDERMAL_GROWTH_FACTOR_ACTIVATED_RECEPTOR_ACTIVITY	0.0177711	0.157834	0.352488	-0.770517	-1.6095	11
4528	GOBP_POSITIVE_REGULATION_OF_LIPOPROTEIN_PARTICLE_CLEARANCE	0.017825	0.158048	0.352488	0.838128	1.58119	6
4715	GOBP_POSITIVE_REGULATION_OF_PHOSPHATIDYLINOSITOL_3_KINASE_SIGNALING	0.0178212	0.158048	0.352488	-0.498063	-1.49977	72
4236	GOBP_POSITIVE_REGULATION_OF_CHROMOSOME_SEPARATION	0.0178987	0.15857	0.352488	0.570925	1.5889	28
4837	GOBP_POSITIVE_REGULATION_OF_SIGNAL_TRANSDUCTION	0.0179313	0.158726	0.352488	-0.311582	-1.18768	1441
10534	GOMF_VOLTAGE_GATED_SODIUM_CHANNEL_ACTIVITY	0.0180175	0.159357	0.352488	-0.639217	-1.56826	24
5619	GOBP_REGULATION_OF_CELL_GROWTH_INVOLVED_IN_CARDIAC_MUSCLE_CELL_DEVELOPMENT	0.0180364	0.159392	0.352488	0.596014	1.63978	27
822	GOBP_CEREBELLAR_GRANULAR_LAYER_DEVELOPMENT	0.018083	0.159651	0.352488	-0.685388	-1.53468	16
8771	GOCC_T_TUBULE	0.0180958	0.159651	0.352488	-0.499307	-1.49381	70
1717	GOBP_GLYCINE_IMPORT_ACROSS_PLASMA_MEMBRANE	0.0181836	0.160293	0.352488	-0.861413	-1.50548	5
3616	GOBP_NEUTROPHIL_ACTIVATION_INVOLVED_IN_IMMUNE_RESPONSE	0.0182015	0.160318	0.352488	0.625303	1.59592	20
8011	GOCC_CYTOPLASMIC_EXOSOME_RNASE_COMPLEX	0.0182662	0.160754	0.352488	0.666384	1.56755	15
6003	GOBP_REGULATION_OF_LEUKOCYTE_MEDIATED_IMMUNITY	0.018298	0.160901	0.352488	-0.389121	-1.34985	231
4008	GOBP_PLASMACYTOID_DENDRITIC_CELL_ANTIGEN_PROCESSING_AND_PRESENTATION	0.0183596	0.161005	0.352488	0.888197	1.4892	4
8136	GOCC_FEMALE_PRONUCLEUS	0.0183701	0.161005	0.352488	0.758161	1.53704	9
10313	GOMF_SPHINGOLIPID_FLOPPASE_ACTIVITY	0.0183703	0.161005	0.352488	-0.900049	-1.50615	4
10315	GOMF_SPHINGOLIPID_TRANSPORTER_ACTIVITY	0.018361	0.161005	0.352488	-0.729676	-1.59911	14
5295	GOBP_PURINE_DEOXYRIBONUCLEOTIDE_METABOLIC_PROCESS	0.0183887	0.161033	0.352488	0.624956	1.57744	19
6781	GOBP_RESPONSE_TO_COLD	0.0185141	0.161998	0.352488	0.507966	1.5767	44
648	GOBP_CELLULAR_RESPONSE_TO_KETONE	0.0186733	0.163024	0.352488	-0.475579	-1.47393	86
4110	GOBP_POSITIVE_REGULATION_OF_AUTOPHAGY	0.0186772	0.163024	0.352488	0.368609	1.36852	141
5897	GOBP_REGULATION_OF_HEMOPOIESIS	0.0186626	0.163024	0.352488	-0.356376	-1.29834	401
9679	GOMF_MAP_KINASE_TYROSINE_SERINE_THREONINE_PHOSPHATASE_ACTIVITY	0.0187695	0.163694	0.352488	-0.720729	-1.56284	13
1118	GOBP_DETECTION_OF_STIMULUS_INVOLVED_IN_SENSORY_PERCEPTION	0.0188109	0.163922	0.352488	-0.451508	-1.43195	103
62	GOBP_ACTOMYOSIN_STRUCTURE_ORGANIZATION	0.0189901	0.165347	0.352488	-0.397331	-1.36225	205
3073	GOBP_NEGATIVE_REGULATION_OF_HORMONE_SECRETION	0.0191153	0.165833	0.352488	-0.475203	-1.47276	86
3100	GOBP_NEGATIVE_REGULATION_OF_INTERLEUKIN_17_PRODUCTION	0.0191238	0.165833	0.352488	-0.669362	-1.53432	18
9741	GOMF_MONOAMINE_TRANSMEMBRANE_TRANSPORTER_ACTIVITY	0.0191075	0.165833	0.352488	-0.777577	-1.59957	10
10277	GOMF_SIGNALING_RECEPTOR_REGULATOR_ACTIVITY	0.0190726	0.165833	0.352488	-0.352131	-1.29119	442
10338	GOMF_STRUCTURAL_CONSTITUENT_OF_NUCLEAR_PORE	0.0191106	0.165833	0.352488	0.594827	1.55651	22
2812	GOBP_NEGATIVE_REGULATION_OF_APOPTOTIC_SIGNALING_PATHWAY	0.0191582	0.165996	0.352488	-0.394909	-1.36116	221
595	GOBP_CELLULAR_RESPONSE_TO_ALCOHOL	0.0192575	0.166721	0.352488	-0.4855	-1.48496	77
2349	GOBP_MAMMARY_GLAND_DEVELOPMENT	0.0193008	0.16696	0.352488	-0.436381	-1.42638	134
4634	GOBP_POSITIVE_REGULATION_OF_NATURAL_KILLER_CELL_DIFFERENTIATION	0.0193937	0.167491	0.352488	0.723562	1.58313	11
10084	GOMF_PRE_MRNA_INTRONIC_BINDING	0.0193937	0.167491	0.352488	0.725674	1.58775	11
2404	GOBP_MEIOTIC_CHROMOSOME_SEPARATION	0.0194746	0.168053	0.352488	0.592641	1.55078	22
6432	GOBP_REGULATION_OF_RESPONSE_TO_DNA_DAMAGE_STIMULUS	0.019601	0.169007	0.352488	0.308302	1.23776	272
9917	GOMF_OXIDOREDUCTASE_ACTIVITY_ACTING_ON_PAIRED_DONORS_WITH_INCORPORATION_OR_REDUCTION_OF_MOLECULAR_OXYGEN_ANOTHER_COMPOUND_AS_ONE_DONOR_AND_INCORPORATION_OF_ONE_ATOM_OF_OXYGEN	0.0196619	0.169258	0.352488	-0.859239	-1.50168	5
9962	GOMF_PEPTIDE_ANTIGEN_BINDING	0.0196578	0.169258	0.352488	0.659545	1.55146	15
2798	GOBP_NEGATIVE_REGULATION_OF_AMINE_TRANSPORT	0.0196917	0.169377	0.352488	-0.586908	-1.57443	37
6137	GOBP_REGULATION_OF_MONONUCLEAR_CELL_MIGRATION	0.0197368	0.169628	0.352488	-0.455173	-1.45614	109
9876	GOMF_ONCOSTATIN_M_RECEPTOR_ACTIVITY	0.0197567	0.169662	0.352488	0.858669	1.53702	5
2174	GOBP_LEUKOCYTE_CELL_CELL_ADHESION	0.019801	0.169905	0.352488	-0.358592	-1.30216	378
2381	GOBP_MATURATION_OF_SSU_RRNA_FROM_TRICISTRONIC_RRNA_TRANSCRIPT_SSU_RRNA_5_8S_RRNA_LSU_RRNA	0.0198345	0.170056	0.352488	0.554908	1.6057	33
1843	GOBP_HINDBRAIN_MORPHOGENESIS	0.0198625	0.170158	0.352488	-0.519775	-1.51298	57
553	GOBP_CELLULAR_COMPONENT_DISASSEMBLY	0.0200347	0.171495	0.352488	-0.355488	-1.29567	402
5755	GOBP_REGULATION_OF_ENDODEOXYRIBONUCLEASE_ACTIVITY	0.0200902	0.171832	0.352488	-0.826923	-1.54188	7
7844	GOCC_A_BAND	0.0201537	0.172006	0.352488	-0.570728	-1.52785	36
8459	GOCC_OUTER_KINETOCHORE	0.0201588	0.172006	0.352488	0.712208	1.60228	12
9695	GOMF_METAL_CATION_MONOATOMIC_CATION_ANTIPORTER_ACTIVITY	0.020159	0.172006	0.352488	-0.643776	-1.52408	21
5940	GOBP_REGULATION_OF_INFLAMMATORY_RESPONSE	0.0201772	0.172024	0.352488	-0.361959	-1.29865	330
4123	GOBP_POSITIVE_REGULATION_OF_BLOOD_PRESSURE	0.0202467	0.172374	0.352488	-0.534178	-1.52394	51
8909	GOMF_ALPHA_CATENIN_BINDING	0.0202508	0.172374	0.352488	-0.763147	-1.59411	11
1421	GOBP_ERBB2_SIGNALING_PATHWAY	0.0203537	0.172476	0.352488	0.6574	1.54642	15
3278	GOBP_NEGATIVE_REGULATION_OF_OSTEOBLAST_DIFFERENTIATION	0.0203038	0.172476	0.352488	-0.515587	-1.4854	54
6476	GOBP_REGULATION_OF_SEROTONIN_UPTAKE	0.0203478	0.172476	0.352488	-0.855589	-1.55916	6
9386	GOMF_GLUCURONOSYL_N_ACETYLGALACTOSAMINYL_PROTEOGLYCAN_4_BETA_N_ACETYLGALACTOSAMINYLTRANSFERASE_ACTIVITY	0.0203478	0.172476	0.352488	-0.855605	-1.55919	6
9567	GOMF_ISOCITRATE_DEHYDROGENASE_NAD_P_PLUS_ACTIVITY	0.0203599	0.172476	0.352488	0.855349	1.53108	5
9690	GOMF_METALLODIPEPTIDASE_ACTIVITY	0.020356	0.172476	0.352488	0.753674	1.52794	9
10517	GOMF_VITAMIN_BINDING	0.0203914	0.172605	0.352488	-0.436824	-1.41496	125
2713	GOBP_MUSCLE_TISSUE_DEVELOPMENT	0.0204239	0.172725	0.352488	-0.354873	-1.30177	445
3614	GOBP_NEUTRAL_LIPID_CATABOLIC_PROCESS	0.0204543	0.172725	0.352488	0.483696	1.48383	43
9188	GOMF_CYTOKINE_BINDING	0.0204387	0.172725	0.352488	-0.424804	-1.39164	136
4641	GOBP_POSITIVE_REGULATION_OF_NEURAL_PRECURSOR_CELL_PROLIFERATION	0.0204957	0.172938	0.352488	-0.495956	-1.47635	68
1231	GOBP_DOPAMINE_RECEPTOR_SIGNALING_PATHWAY	0.0205893	0.173553	0.352488	-0.567164	-1.53016	38
4319	GOBP_POSITIVE_REGULATION_OF_ENDOTHELIAL_CELL_PROLIFERATION	0.0206013	0.173553	0.352488	-0.46221	-1.44242	93
8231	GOCC_INTERCHROMATIN_GRANULE	0.0206616	0.173786	0.352488	0.854778	1.53006	5
9061	GOMF_CARBOHYDRATE_TRANSMEMBRANE_TRANSPORTER_ACTIVITY	0.0206566	0.173786	0.352488	-0.584221	-1.53727	31
445	GOBP_CAMP_METABOLIC_PROCESS	0.020809	0.17461	0.352488	-0.724633	-1.58806	14
1085	GOBP_DEOXYRIBONUCLEOSIDE_METABOLIC_PROCESS	0.0208252	0.17461	0.352488	0.710108	1.59755	12
5724	GOBP_REGULATION_OF_DNA_DUPLEX_UNWINDING	0.0207873	0.17461	0.352488	0.883671	1.48162	4
10443	GOMF_TRANSMEMBRANE_RECEPTOR_PROTEIN_TYROSINE_KINASE_ACTIVATOR_ACTIVITY	0.020809	0.17461	0.352488	-0.724389	-1.58752	14
6285	GOBP_REGULATION_OF_PHOSPHATIDYLINOSITOL_BIOSYNTHETIC_PROCESS	0.0208446	0.174635	0.352488	-0.858656	-1.50066	5
5637	GOBP_REGULATION_OF_CENTROSOME_CYCLE	0.021008	0.175866	0.352488	0.493189	1.56969	50
2126	GOBP_KIDNEY_MESENCHYME_DEVELOPMENT	0.0210811	0.176338	0.352488	-0.722211	-1.58275	14
9111	GOMF_CHEMOKINE_BINDING	0.021108	0.176425	0.352488	-0.597012	-1.54098	29
5929	GOBP_REGULATION_OF_HYDROGEN_PEROXIDE_MEDIATED_PROGRAMMED_CELL_DEATH	0.0211617	0.176458	0.352488	0.69573	1.6029	13
6896	GOBP_RESPONSE_TO_PEPTIDOGLYCAN	0.0211584	0.176458	0.352488	0.707439	1.59155	12
9572	GOMF_JUN_KINASE_KINASE_KINASE_ACTIVITY	0.0211584	0.176458	0.352488	0.709367	1.59588	12
3071	GOBP_NEGATIVE_REGULATION_OF_HOMOTYPIC_CELL_CELL_ADHESION	0.0212052	0.176683	0.352488	-0.66547	-1.5254	18
2644	GOBP_MONOUBIQUITINATED_HISTONE_DEUBIQUITINATION	0.0212919	0.177266	0.352488	0.572703	1.54818	25
5376	GOBP_REACTIVE_NITROGEN_SPECIES_METABOLIC_PROCESS	0.0213251	0.177403	0.352488	-0.463783	-1.43826	87
10632	MP_INCREASED_TUMOR_GROWTH_SIZE	0.021355	0.177514	0.352488	-0.544875	-1.55332	52
3128	GOBP_NEGATIVE_REGULATION_OF_KINASE_ACTIVITY	0.0213956	0.177712	0.352488	-0.390478	-1.34223	210
7638	GOBP_UV_DAMAGE_EXCISION_REPAIR	0.0214916	0.17837	0.352488	0.706133	1.58861	12
2367	GOBP_MAST_CELL_CYTOKINE_PRODUCTION	0.0216251	0.179161	0.352488	-0.785122	-1.56857	9
9463	GOMF_HISTONE_BINDING	0.0216268	0.179161	0.352488	0.31449	1.23336	223
9533	GOMF_INSULIN_LIKE_GROWTH_FACTOR_BINDING	0.0216374	0.179161	0.352488	-0.632623	-1.54213	23
2377	GOBP_MATURATION_OF_5_8S_RRNA_FROM_TRICISTRONIC_RRNA_TRANSCRIPT_SSU_RRNA_5_8S_RRNA_LSU_RRNA	0.0216687	0.179176	0.352488	0.599343	1.5891	23
8702	GOCC_SPLICEOSOMAL_TRI_SNRNP_COMPLEX	0.0217234	0.179176	0.352488	0.535519	1.50295	29
8755	GOCC_TRANSPORT_VESICLE_MEMBRANE	0.0217101	0.179176	0.352488	-0.421927	-1.40203	144
9225	GOMF_DICARBOXYLIC_ACID_TRANSMEMBRANE_TRANSPORTER_ACTIVITY	0.0217234	0.179176	0.352488	0.534578	1.50031	29
9506	GOMF_HYDRO_LYASE_ACTIVITY	0.0216978	0.179176	0.352488	-0.539946	-1.52342	47
346	GOBP_BIOMINERALIZATION	0.0218723	0.180264	0.352488	-0.401491	-1.36041	173
2131	GOBP_KINETOCHORE_ORGANIZATION	0.0219592	0.18084	0.352488	0.608124	1.53496	19
1618	GOBP_GAMMA_AMINOBUTYRIC_ACID_BIOSYNTHETIC_PROCESS	0.0220272	0.180841	0.352488	-0.856119	-1.49623	5
2728	GOBP_MYELOID_LEUKOCYTE_ACTIVATION	0.0220158	0.180841	0.352488	-0.38807	-1.34981	236
5654	GOBP_REGULATION_OF_CHROMOSOME_CONDENSATION	0.0220012	0.180841	0.352488	0.719336	1.57388	11
6587	GOBP_REGULATION_OF_TIMING_OF_NEURON_DIFFERENTIATION	0.0220272	0.180841	0.352488	-0.85607	-1.49614	5
6867	GOBP_RESPONSE_TO_MECHANICAL_STIMULUS	0.0220675	0.181031	0.352488	-0.421949	-1.39368	141
3721	GOBP_NUCLEOTIDE_EXCISION_REPAIR	0.0221086	0.181142	0.352488	0.421639	1.41175	74
4710	GOBP_POSITIVE_REGULATION_OF_PEPTIDYL_TYROSINE_PHOSPHORYLATION	0.0221214	0.181142	0.352488	-0.395903	-1.34372	183
6427	GOBP_REGULATION_OF_RESPIRATORY_GASEOUS_EXCHANGE	0.022132	0.181142	0.352488	-0.619379	-1.54131	25
9048	GOMF_CALMODULIN_BINDING	0.0221792	0.181388	0.352488	-0.403434	-1.37068	186
4490	GOBP_POSITIVE_REGULATION_OF_INTRINSIC_APOPTOTIC_SIGNALING_PATHWAY	0.02222	0.181583	0.352488	-0.506015	-1.49448	64
7022	GOBP_RNA_LOCALIZATION	0.0222436	0.181636	0.352488	0.350771	1.31503	152
933	GOBP_COLLAGEN_ACTIVATED_TYROSINE_KINASE_RECEPTOR_SIGNALING_PATHWAY	0.0223194	0.181726	0.352488	-0.756326	-1.61954	12
6676	GOBP_REGULATION_OF_VENTRICULAR_CARDIAC_MUSCLE_CELL_ACTION_POTENTIAL	0.0223194	0.181726	0.352488	-0.755922	-1.61867	12
6951	GOBP_RETINAL_BLOOD_VESSEL_MORPHOGENESIS	0.0223229	0.181726	0.352488	-0.855445	-1.49505	5
9200	GOMF_C_X3_C_CHEMOKINE_BINDING	0.0223229	0.181726	0.352488	-0.855294	-1.49479	5
6658	GOBP_REGULATION_OF_T_HELPER_1_TYPE_IMMUNE_RESPONSE	0.0223677	0.181952	0.352488	-0.581408	-1.52987	31
932	GOBP_COLLAGEN_ACTIVATED_SIGNALING_PATHWAY	0.0224805	0.18259	0.352488	-0.676103	-1.53089	17
2649	GOBP_MORPHOGENESIS_OF_AN_EPITHELIAL_BUD	0.0224805	0.18259	0.352488	-0.672819	-1.52346	17
1976	GOBP_INFLAMMATORY_RESPONSE	0.0225926	0.183271	0.352488	-0.328206	-1.22535	689
3158	GOBP_NEGATIVE_REGULATION_OF_LYASE_ACTIVITY	0.0225989	0.183271	0.352488	0.632088	1.57868	18
6344	GOBP_REGULATION_OF_PROTEIN_AUTOPHOSPHORYLATION	0.0226347	0.183309	0.352488	-0.537611	-1.49308	43
9062	GOMF_CARBONATE_DEHYDRATASE_ACTIVITY	0.022638	0.183309	0.352488	-0.808063	-1.55731	8
6592	GOBP_REGULATION_OF_TOLL_LIKE_RECEPTOR_4_SIGNALING_PATHWAY	0.0226954	0.183634	0.352488	0.612749	1.58428	21
4250	GOBP_POSITIVE_REGULATION_OF_CORTICOSTEROID_HORMONE_SECRETION	0.0227595	0.184013	0.352488	0.778822	1.5641	8
439	GOBP_CALMODULIN_DEPENDENT_KINASE_SIGNALING_PATHWAY	0.0228243	0.184397	0.352488	0.701627	1.57847	12
2705	GOBP_MUSCLE_CELL_PROLIFERATION	0.022883	0.184731	0.352488	-0.382924	-1.33184	242
1299	GOBP_EMBRYONIC_RETINA_MORPHOGENESIS_IN_CAMERA_TYPE_EYE	0.0229398	0.185049	0.352488	-0.822297	-1.53325	7
804	GOBP_CENTRAL_NERVOUS_SYSTEM_NEURON_DIFFERENTIATION	0.0230261	0.185398	0.352488	-0.39647	-1.35861	198
2304	GOBP_MACROPHAGE_INFLAMMATORY_PROTEIN_1_ALPHA_PRODUCTION	0.0230527	0.185398	0.352488	0.794245	1.53335	7
7410	GOBP_TETRAPYRROLE_METABOLIC_PROCESS	0.0230072	0.185398	0.352488	-0.548922	-1.56448	50
7793	GOCC_ALVEOLAR_LAMELLAR_BODY	0.0230527	0.185398	0.352488	0.794028	1.53293	7
628	GOBP_CELLULAR_RESPONSE_TO_FATTY_ACID	0.0231146	0.185668	0.352488	0.613647	1.56617	20
8661	GOCC_SITE_OF_DOUBLE_STRAND_BREAK	0.0231213	0.185668	0.352488	0.451002	1.45104	53
388	GOBP_BRANCHING_INVOLVED_IN_SALIVARY_GLAND_MORPHOGENESIS	0.0232149	0.185847	0.352488	-0.60502	-1.54428	28
811	GOBP_CENTROMERE_COMPLEX_ASSEMBLY	0.0232084	0.185847	0.352488	0.584686	1.60861	27
2015	GOBP_INTEGRIN_ACTIVATION	0.0232149	0.185847	0.352488	-0.60544	-1.54535	28
3503	GOBP_NEGATIVE_REGULATION_OF_VASCULAR_ASSOCIATED_SMOOTH_MUSCLE_CELL_MIGRATION	0.0234015	0.185847	0.352488	-0.754716	-1.61609	12
4222	GOBP_POSITIVE_REGULATION_OF_CHEMOKINE_PRODUCTION	0.0233238	0.185847	0.352488	0.420738	1.41469	68
4772	GOBP_POSITIVE_REGULATION_OF_PROTEIN_MODIFICATION_PROCESS	0.0231666	0.185847	0.352488	-0.321447	-1.21357	948
5105	GOBP_PROTEIN_CONTAINING_COMPLEX_REMODELING	0.0232346	0.185847	0.352488	0.530205	1.48804	29
5857	GOBP_REGULATION_OF_GLUTAMATE_SECRETION	0.0233684	0.185847	0.352488	-0.617472	-1.53656	25
6191	GOBP_REGULATION_OF_NEURONAL_SYNAPTIC_PLASTICITY	0.0233977	0.185847	0.352488	-0.489583	-1.46162	69
6288	GOBP_REGULATION_OF_PHOSPHOLIPASE_ACTIVITY	0.0234055	0.185847	0.352488	-0.525007	-1.51766	56
7654	GOBP_VASCULAR_ENDOTHELIAL_CELL_PROLIFERATION	0.0233456	0.185847	0.352488	-0.579834	-1.52573	31
8868	GOMF_ACTIVE_ION_TRANSMEMBRANE_TRANSPORTER_ACTIVITY	0.023383	0.185847	0.352488	-0.386305	-1.33156	220
9190	GOMF_CYTOKINE_RECEPTOR_BINDING	0.0232612	0.185847	0.352488	-0.380685	-1.32387	238
9246	GOMF_DNA_HELICASE_ACTIVITY	0.0232962	0.185847	0.352488	0.436614	1.45906	67
10317	GOMF_SPHINGOSINE_1_PHOSPHATE_PHOSPHATASE_ACTIVITY	0.0233095	0.185847	0.352488	0.945459	1.35689	2
688	GOBP_CELLULAR_RESPONSE_TO_THYROID_HORMONE_STIMULUS	0.0234439	0.186013	0.352488	-0.768922	-1.58176	10
4777	GOBP_POSITIVE_REGULATION_OF_PROTEIN_POLYUBIQUITINATION	0.0234849	0.1862	0.352488	0.648551	1.5256	15
1472	GOBP_ESTROGEN_BIOSYNTHETIC_PROCESS	0.0236142	0.187085	0.352488	0.829442	1.56481	6
8773	GOCC_U1_SNRNP	0.0236499	0.187229	0.352488	0.629502	1.57222	18
5006	GOBP_POSTSYNAPTIC_DENSITY_PROTEIN_95_CLUSTERING	0.0237149	0.187325	0.352488	-0.768004	-1.57987	10
5426	GOBP_REGULATION_OF_ALKALINE_PHOSPHATASE_ACTIVITY	0.0237149	0.187325	0.352488	-0.767514	-1.57887	10
8270	GOCC_JUXTAPARANODE_REGION_OF_AXON	0.0237149	0.187325	0.352488	-0.767961	-1.57979	10
9921	GOMF_OXIDOREDUCTASE_ACTIVITY_ACTING_ON_PAIRED_DONORS_WITH_INCORPORATION_OR_REDUCTION_OF_MOLECULAR_OXYGEN_REDUCED_PTERIDINE_AS_ONE_DONOR_AND_INCORPORATION_OF_ONE_ATOM_OF_OXYGEN	0.0237947	0.187816	0.352488	-0.820919	-1.53068	7
5399	GOBP_REGULATION_OF_3_UTR_MEDIATED_MRNA_STABILIZATION	0.0238219	0.187891	0.352488	0.878839	1.47351	4
6036	GOBP_REGULATION_OF_LYMPHOCYTE_MEDIATED_IMMUNITY	0.0238551	0.188013	0.352488	-0.404535	-1.36366	165
1420	GOBP_ERBB2_ERBB4_SIGNALING_PATHWAY	0.0239794	0.188853	0.352488	0.851931	1.52496	5
2474	GOBP_MESONEPHROS_DEVELOPMENT	0.0240469	0.188977	0.352488	-0.43898	-1.41226	111
6158	GOBP_REGULATION_OF_MUSCLE_SYSTEM_PROCESS	0.0240479	0.188977	0.352488	-0.386487	-1.34483	243
8869	GOMF_ACTIVE_TRANSMEMBRANE_TRANSPORTER_ACTIVITY	0.0240483	0.188977	0.352488	-0.361078	-1.29849	351
5432	GOBP_REGULATION_OF_AMINO_ACID_TRANSPORT	0.0241263	0.189449	0.352488	-0.528151	-1.50674	51
240	GOBP_ARF_PROTEIN_SIGNAL_TRANSDUCTION	0.0241751	0.189692	0.352488	-0.644251	-1.50212	20
9015	GOMF_BIOACTIVE_LIPID_RECEPTOR_ACTIVITY	0.0241935	0.189697	0.352488	-0.689768	-1.53289	15
1695	GOBP_GLUTAMATE_RECEPTOR_SIGNALING_PATHWAY	0.0243351	0.190239	0.352488	-0.534827	-1.50898	47
3628	GOBP_NEUTROPHIL_MEDIATED_KILLING_OF_GRAM_NEGATIVE_BACTERIUM	0.0243073	0.190239	0.352488	0.790536	1.52619	7
4555	GOBP_POSITIVE_REGULATION_OF_MAP_KINASE_ACTIVITY	0.024352	0.190239	0.352488	-0.42252	-1.37228	128
4812	GOBP_POSITIVE_REGULATION_OF_RESPONSE_TO_INTERFERON_GAMMA	0.0243073	0.190239	0.352488	0.790489	1.5261	7
8525	GOCC_POSTSYNAPTIC_DENSITY_INTRACELLULAR_COMPONENT	0.0243173	0.190239	0.352488	-0.582067	-1.53618	32
5597	GOBP_REGULATION_OF_CELL_ADHESION_MEDIATED_BY_INTEGRIN	0.0244834	0.191125	0.352488	-0.567695	-1.57978	45
8541	GOCC_PRERIBOSOME_LARGE_SUBUNIT_PRECURSOR	0.024511	0.1912	0.352488	0.608	1.572	21
1137	GOBP_DEVELOPMENTAL_INDUCTION	0.0245714	0.191531	0.352488	-0.53316	-1.48072	43
6292	GOBP_REGULATION_OF_PHOSPHOLIPID_CATABOLIC_PROCESS	0.0246209	0.191777	0.352488	0.790001	1.52516	7
939	GOBP_COLLATERAL_SPROUTING_IN_ABSENCE_OF_INJURY	0.0246882	0.19216	0.352488	-0.852152	-1.48929	5
2440	GOBP_MEMBRANE_REPOLARIZATION_DURING_CARDIAC_MUSCLE_CELL_ACTION_POTENTIAL	0.0247542	0.192291	0.352488	-0.751567	-1.60935	12
6947	GOBP_RESPONSE_TO_YEAST	0.0247705	0.192291	0.352488	0.686403	1.58141	13
7224	GOBP_SPECIFICATION_OF_ANIMAL_ORGAN_IDENTITY	0.0247773	0.192291	0.352488	-0.543765	-1.50439	42
7262	GOBP_SPINDLE_ELONGATION	0.0247684	0.192291	0.352488	0.737359	1.55017	10
1552	GOBP_FEMALE_MEIOSIS_CHROMOSOME_SEGREGATION	0.0249346	0.192668	0.352488	0.789553	1.52429	7
2466	GOBP_MESODERMAL_CELL_MIGRATION	0.0248877	0.192668	0.352488	-0.802235	-1.54608	8
3562	GOBP_NEUROMUSCULAR_PROCESS_CONTROLLING_POSTURE	0.0249345	0.192668	0.352488	-0.643198	-1.49967	20
6629	GOBP_REGULATION_OF_TRIGLYCERIDE_BIOSYNTHETIC_PROCESS	0.0248723	0.192668	0.352488	0.577214	1.55252	24
6670	GOBP_REGULATION_OF_VASCULAR_ENDOTHELIAL_GROWTH_FACTOR_RECEPTOR_SIGNALING_PATHWAY	0.0249345	0.192668	0.352488	-0.600337	-1.53233	28
10545	GOMF_XYLOSYLTRANSFERASE_ACTIVITY	0.0249346	0.192668	0.352488	0.789557	1.5243	7
8050	GOCC_DNA_POLYMERASE_COMPLEX	0.0250514	0.193389	0.352488	0.62352	1.55728	18
9964	GOMF_PEPTIDE_HORMONE_BINDING	0.0250642	0.193389	0.352488	0.445412	1.43305	53
2604	GOBP_MITOTIC_SPINDLE_ASSEMBLY	0.0252829	0.194794	0.352488	0.445869	1.4487	57
6084	GOBP_REGULATION_OF_MESENCHYMAL_STEM_CELL_PROLIFERATION	0.0252795	0.194794	0.352488	-0.849902	-1.48536	5
9218	GOMF_DEOXYRIBONUCLEASE_ACTIVITY	0.0253468	0.195145	0.352488	0.446207	1.43752	55
947	GOBP_COMMON_BILE_DUCT_DEVELOPMENT	0.0254501	0.195516	0.352488	-0.80083	-1.54338	8
4025	GOBP_PLATELET_DEGRANULATION	0.0254501	0.195516	0.352488	-0.800882	-1.54348	8
5956	GOBP_REGULATION_OF_INTERLEUKIN_4_PRODUCTION	0.0254282	0.195516	0.352488	-0.601282	-1.56814	30
7850	GOCC_BASOLATERAL_PLASMA_MEMBRANE	0.0256032	0.19655	0.352488	-0.386093	-1.33386	225
1090	GOBP_DEOXYRIBONUCLEOTIDE_BIOSYNTHETIC_PROCESS	0.0257408	0.196764	0.352488	0.634176	1.5558	17
1658	GOBP_GLAND_DEVELOPMENT	0.0259455	0.196764	0.352488	-0.353625	-1.29598	441
2571	GOBP_MITOCHONDRIAL_RNA_PROCESSING	0.0259204	0.196764	0.352488	0.643126	1.51284	15
2579	GOBP_MITOCHONDRION_LOCALIZATION	0.0256641	0.196764	0.352488	0.46608	1.46915	48
3686	GOBP_NUCLEOBASE_BIOSYNTHETIC_PROCESS	0.0259204	0.196764	0.352488	0.643278	1.5132	15
3688	GOBP_NUCLEOBASE_CONTAINING_COMPOUND_TRANSPORT	0.0257901	0.196764	0.352488	0.33544	1.2708	174
3732	GOBP_NUCLEUS_ORGANIZATION	0.0259223	0.196764	0.352488	0.367455	1.33961	120
4386	GOBP_POSITIVE_REGULATION_OF_GLIOGENESIS	0.0259448	0.196764	0.352488	-0.4646	-1.42961	80
4778	GOBP_POSITIVE_REGULATION_OF_PROTEIN_SECRETION	0.0257679	0.196764	0.352488	-0.420128	-1.3967	147
5038	GOBP_PRESYNAPTIC_DENSE_CORE_VESICLE_EXOCYTOSIS	0.0257313	0.196764	0.352488	-0.800148	-1.54206	8
5622	GOBP_REGULATION_OF_CELL_MATRIX_ADHESION	0.0257059	0.196764	0.352488	-0.428791	-1.38169	121
7153	GOBP_SKELETAL_MUSCLE_SATELLITE_CELL_ACTIVATION	0.0257313	0.196764	0.352488	-0.800269	-1.54229	8
8195	GOCC_HAUS_COMPLEX	0.0259426	0.196764	0.352488	0.774251	1.55491	8
8684	GOCC_SPERMATOPROTEASOME_COMPLEX	0.0257892	0.196764	0.352488	0.847727	1.51743	5
9157	GOMF_CREATINE_KINASE_ACTIVITY	0.0258708	0.196764	0.352488	-0.848243	-1.48246	5
9345	GOMF_FLAP_ENDONUCLEASE_ACTIVITY	0.0258755	0.196764	0.352488	0.786776	1.51893	7
9643	GOMF_LYSOPHOSPHATIDIC_ACID_RECEPTOR_ACTIVITY	0.0258708	0.196764	0.352488	-0.847842	-1.48176	5
785	GOBP_CELL_PROLIFERATION_IN_HINDBRAIN	0.0260465	0.19739	0.352488	-0.653686	-1.5202	19
2618	GOBP_MODULATION_BY_HOST_OF_VIRAL_RNA_GENOME_REPLICATION	0.0260908	0.197444	0.352488	0.84451	1.51168	5
6933	GOBP_RESPONSE_TO_UV	0.0260788	0.197444	0.352488	0.360592	1.33315	135
1761	GOBP_GRANULOCYTE_MIGRATION	0.0261958	0.197536	0.352488	0.352581	1.32873	153
6631	GOBP_REGULATION_OF_TRIGLYCERIDE_METABOLIC_PROCESS	0.026162	0.197536	0.352488	0.479967	1.53102	49
8427	GOCC_NUCLEAR_PORE_CENTRAL_TRANSPORT_CHANNEL	0.0261891	0.197536	0.352488	0.785569	1.5166	7
9793	GOMF_NEUREXIN_FAMILY_PROTEIN_BINDING	0.0261675	0.197536	0.352488	-0.708488	-1.5363	13
10421	GOMF_TRANSFERASE_ACTIVITY_TRANSFERRING_SULPHUR_CONTAINING_GROUPS	0.0261776	0.197536	0.352488	-0.490081	-1.4471	61
9778	GOMF_NADP_BINDING	0.0262982	0.198168	0.352488	0.471771	1.44724	43
1068	GOBP_DENDRITIC_CELL_CHEMOTAXIS	0.0264089	0.198702	0.352488	-0.655129	-1.50169	18
1670	GOBP_GLOMERULAR_BASEMENT_MEMBRANE_DEVELOPMENT	0.0264252	0.198702	0.352488	-0.763854	-1.57134	10
2602	GOBP_MITOTIC_SISTER_CHROMATID_COHESION	0.0263906	0.198702	0.352488	0.582237	1.52356	22
4514	GOBP_POSITIVE_REGULATION_OF_LEUKOCYTE_MEDIATED_IMMUNITY	0.0264695	0.198755	0.352488	-0.419721	-1.36562	130
6831	GOBP_RESPONSE_TO_INSECTICIDE	0.0264621	0.198755	0.352488	-0.847158	-1.48057	5
10281	GOMF_SINGLE_STRANDED_DNA_ENDODEOXYRIBONUCLEASE_ACTIVITY	0.0264895	0.198765	0.352488	0.693392	1.55994	12
425	GOBP_CALCIUM_INDEPENDENT_CELL_CELL_ADHESION_VIA_PLASMA_MEMBRANE_CELL_ADHESION_MOLECULES	0.026575	0.199006	0.352488	-0.798974	-1.5398	8
2605	GOBP_MITOTIC_SPINDLE_ELONGATION	0.0265792	0.199006	0.352488	0.773134	1.55267	8
7185	GOBP_SMOOTH_MUSCLE_CELL_MIGRATION	0.0265965	0.199006	0.352488	-0.43865	-1.39483	105
8208	GOCC_IGG_IMMUNOGLOBULIN_COMPLEX	0.026553	0.199006	0.352488	0.874876	1.46687	4
919	GOBP_CLEAVAGE_INVOLVED_IN_RRNA_PROCESSING	0.0266185	0.199031	0.352488	0.557278	1.51304	26
9027	GOMF_CADHERIN_BINDING	0.0266409	0.199058	0.352488	-0.483589	-1.44373	69
122	GOBP_ALTERNATIVE_MRNA_SPLICING_VIA_SPLICEOSOME	0.0267	0.199059	0.352488	0.402808	1.35551	75
1505	GOBP_EXTRATHYMIC_T_CELL_DIFFERENTIATION	0.0266612	0.199059	0.352488	0.940422	1.34966	2
2833	GOBP_NEGATIVE_REGULATION_OF_BONE_MINERALIZATION	0.0266874	0.199059	0.352488	-0.663946	-1.50337	17
3685	GOBP_NUCLEIC_ACID_PHOSPHODIESTER_BOND_HYDROLYSIS	0.0267158	0.199059	0.352488	0.397131	1.3845	90
1857	GOBP_HISTONE_DEUBIQUITINATION	0.0267983	0.199534	0.352488	0.515009	1.54432	38
2403	GOBP_MEIOTIC_CHROMOSOME_SEGREGATION	0.0268469	0.199598	0.352488	0.408719	1.3721	78
5643	GOBP_REGULATION_OF_CHLORIDE_TRANSPORT	0.0268632	0.199598	0.352488	-0.751959	-1.57074	11
6441	GOBP_REGULATION_OF_RESPONSE_TO_STRESS	0.0268318	0.199598	0.282013	-0.306832	-1.16409	1273
2704	GOBP_MUSCLE_CELL_MIGRATION	0.0268861	0.199629	0.352488	-0.430214	-1.38696	120
9128	GOMF_CHROMO_SHADOW_DOMAIN_BINDING	0.0269659	0.200081	0.352488	0.825579	1.55752	6
9430	GOMF_G_PROTEIN_COUPLED_GLUTAMATE_RECEPTOR_BINDING	0.0269896	0.200118	0.352488	-0.70536	-1.52951	13
5163	GOBP_PROTEIN_LIPID_COMPLEX_SUBUNIT_ORGANIZATION	0.0270774	0.20063	0.352488	0.468138	1.4361	43
9967	GOMF_PEPTIDE_N_ACETYLTRANSFERASE_ACTIVITY	0.0271481	0.200974	0.352488	0.501223	1.52125	40
10203	GOMF_RIBOFLAVIN_TRANSMEMBRANE_TRANSPORTER_ACTIVITY	0.0271617	0.200974	0.352488	-0.931355	-1.4771	3
9995	GOMF_PHOSPHATIDYLETHANOLAMINE_FLIPPASE_ACTIVITY	0.0273491	0.20222	0.352488	-0.846363	-1.47918	5
389	GOBP_BRANCHING_MORPHOGENESIS_OF_AN_EPITHELIAL_TUBE	0.0273887	0.20228	0.352488	-0.391763	-1.33844	194
8417	GOCC_NUCLEAR_EXOSOME_RNASE_COMPLEX	0.0273952	0.20228	0.352488	0.681842	1.5709	13
5983	GOBP_REGULATION_OF_I_KAPPAB_PHOSPHORYLATION	0.0274186	0.202312	0.352488	-0.79499	-1.53212	8
9254	GOMF_DNA_TRANSLOCASE_ACTIVITY	0.0274634	0.202502	0.352488	0.873547	1.46464	4
2371	GOBP_MAST_CELL_PROLIFERATION	0.0275093	0.20256	0.352488	-0.761606	-1.56671	10
6469	GOBP_REGULATION_OF_SEMAPHORIN_PLEXIN_SIGNALING_PATHWAY	0.0274946	0.20256	0.352488	0.915002	1.43838	3
753	GOBP_CELL_FATE_COMMITMENT_INVOLVED_IN_FORMATION_OF_PRIMARY_GERM_LAYER	0.0275389	0.202637	0.352488	-0.576765	-1.52219	32
4193	GOBP_POSITIVE_REGULATION_OF_CELL_DEATH	0.0275634	0.202678	0.287857	-0.328367	-1.21989	648
2273	GOBP_LYMPH_VESSEL_MORPHOGENESIS	0.0275844	0.202692	0.352488	-0.610469	-1.51914	25
9888	GOMF_ORGANOPHOSPHATE_ESTER_TRANSMEMBRANE_TRANSPORTER_ACTIVITY	0.0278117	0.204221	0.352488	0.571202	1.57151	27
1636	GOBP_GASTRULATION	0.0280307	0.205687	0.352488	-0.405213	-1.37642	170
186	GOBP_ANION_TRANSPORT	0.0280715	0.205845	0.352488	-0.347718	-1.27539	453
9033	GOMF_CALCIUM_CATION_ANTIPORTER_ACTIVITY	0.028156	0.206322	0.352488	-0.775659	-1.54967	9
5327	GOBP_PYRIMIDINE_CONTAINING_COMPOUND_TRANSMEMBRANE_TRANSPORT	0.028194	0.206395	0.352488	0.706616	1.54605	11
6686	GOBP_REGULATION_OF_VIRAL_INDUCED_CYTOPLASMIC_PATTERN_RECOGNITION_RECEPTOR_SIGNALING_PATHWAY	0.0282047	0.206395	0.352488	0.616012	1.53853	18
9614	GOMF_LIPID_BINDING	0.0282302	0.206439	0.282013	-0.323985	-1.21024	741
3111	GOBP_NEGATIVE_REGULATION_OF_INTRACELLULAR_SIGNAL_TRANSDUCTION	0.0283447	0.207121	0.287857	-0.340853	-1.25315	486
6668	GOBP_REGULATION_OF_VASCULAR_ASSOCIATED_SMOOTH_MUSCLE_CELL_DIFFERENTIATION	0.0283623	0.207121	0.352488	-0.701488	-1.52112	13
3291	GOBP_NEGATIVE_REGULATION_OF_PEPTIDE_SECRETION	0.0284941	0.207869	0.352488	-0.485737	-1.43427	61
9867	GOMF_N_N_DIMETHYLANILINE_MONOOXYGENASE_ACTIVITY	0.0285038	0.207869	0.352488	0.841517	1.50632	5
2457	GOBP_MESENCHYMAL_STEM_CELL_PROLIFERATION	0.0285454	0.208029	0.352488	-0.842746	-1.53575	6
5234	GOBP_PROTEIN_POLYMERIZATION	0.0285751	0.208104	0.352488	-0.377945	-1.32177	249
5505	GOBP_REGULATION_OF_BONE_RESORPTION	0.0286959	0.20884	0.352488	-0.532974	-1.51939	52
8698	GOCC_SPINDLE_POLE	0.028731	0.208953	0.352488	0.36039	1.32422	126
2299	GOBP_MACROPHAGE_COLONY_STIMULATING_FACTOR_PRODUCTION	0.0288275	0.209073	0.352488	-0.841854	-1.4713	5
3526	GOBP_NEPHRIC_DUCT_FORMATION	0.0288275	0.209073	0.352488	-0.841107	-1.46999	5
8431	GOCC_NUCLEAR_REPLICATION_FORK	0.0288287	0.209073	0.352488	0.509771	1.50904	36
9248	GOMF_DNA_N_GLYCOSYLASE_ACTIVITY	0.0288458	0.209073	0.352488	0.701951	1.53585	11
9388	GOMF_GLUTAMATE_GATED_CALCIUM_ION_CHANNEL_ACTIVITY	0.0288275	0.209073	0.352488	-0.840856	-1.46955	5
8314	GOCC_MEMBRANE_PROTEIN_COMPLEX	0.0289428	0.209633	0.352488	-0.313587	-1.1863	1084
4112	GOBP_POSITIVE_REGULATION_OF_AXONOGENESIS	0.0290065	0.209809	0.352488	-0.437622	-1.37725	98
9318	GOMF_EXTRACELLULAR_MATRIX_BINDING	0.0289972	0.209809	0.352488	-0.505774	-1.45026	53
8823	GOMF_2_ACYLGLYCEROL_O_ACYLTRANSFERASE_ACTIVITY	0.029107	0.210393	0.352488	0.84115	1.50566	5
5997	GOBP_REGULATION_OF_LENS_FIBER_CELL_DIFFERENTIATION	0.0291434	0.210513	0.352488	-0.758	-1.55929	10
6733	GOBP_REPRODUCTIVE_BEHAVIOR	0.0291822	0.210651	0.352488	-0.507747	-1.4828	58
5787	GOBP_REGULATION_OF_ESTABLISHMENT_OF_PROTEIN_LOCALIZATION	0.0292463	0.21097	0.282013	-0.33726	-1.24503	525
2677	GOBP_MRNA_SPLICE_SITE_SELECTION	0.0293386	0.211493	0.352488	0.551041	1.49611	26
10269	GOMF_SHORT_CHAIN_FATTY_ACID_TRANSMEMBRANE_TRANSPORTER_ACTIVITY	0.0294237	0.211962	0.352488	-0.950214	-1.40449	2
115	GOBP_ALLANTOIN_METABOLIC_PROCESS	0.0294977	0.212171	0.352488	0.699275	1.52999	11
125	GOBP_AMELOBLAST_DIFFERENTIATION	0.0294968	0.212171	0.352488	-0.814312	-1.51836	7
483	GOBP_CARDIAC_MUSCLE_CELL_ACTION_POTENTIAL	0.0295573	0.212171	0.352488	-0.506446	-1.48814	59
486	GOBP_CARDIAC_MUSCLE_CELL_CONTRACTION	0.0295573	0.212171	0.352488	-0.484001	-1.44076	68
2272	GOBP_LYMPH_VESSEL_DEVELOPMENT	0.0295236	0.212171	0.352488	-0.573642	-1.51394	32
2826	GOBP_NEGATIVE_REGULATION_OF_BIOMINERALIZATION	0.0295724	0.212171	0.352488	-0.607039	-1.5106	25
288	GOBP_AUTOCRINE_SIGNALING	0.0297165	0.212346	0.352488	-0.840835	-1.53227	6
2376	GOBP_MATURATION_OF_5_8S_RRNA	0.029657	0.212346	0.352488	0.531543	1.53809	33
6651	GOBP_REGULATION_OF_T_CELL_PROLIFERATION	0.029715	0.212346	0.352488	-0.398284	-1.349	180
7098	GOBP_SENSORY_PERCEPTION_OF_TOUCH	0.0297165	0.212346	0.352488	-0.840394	-1.53147	6
8480	GOCC_PERINUCLEAR_REGION_OF_CYTOPLASM	0.0296378	0.212346	0.276501	-0.328799	-1.22182	639
10086	GOMF_PRIMARY_AMINE_OXIDASE_ACTIVITY	0.0297144	0.212346	0.352488	-0.83915	-1.46657	5
8441	GOCC_NUCLEOSOME	0.0298829	0.213392	0.352488	0.48621	1.48752	41
8302	GOCC_MALE_PRONUCLEUS	0.0299528	0.213748	0.352488	0.779808	1.50548	7
1962	GOBP_IMPORT_ACROSS_PLASMA_MEMBRANE	0.0300693	0.213942	0.352488	-0.389615	-1.3298	191
3692	GOBP_NUCLEOBASE_METABOLIC_PROCESS	0.0300348	0.213942	0.352488	0.517988	1.51989	35
4597	GOBP_POSITIVE_REGULATION_OF_MITOTIC_CYTOKINESIS	0.0300128	0.213942	0.352488	0.820514	1.54797	6
5891	GOBP_REGULATION_OF_HELICASE_ACTIVITY	0.0300806	0.213942	0.352488	0.764736	1.53581	8
9403	GOMF_GLYCOSAMINOGLYCAN_BINDING	0.0300735	0.213942	0.352488	0.323652	1.24824	202
2730	GOBP_MYELOID_LEUKOCYTE_DIFFERENTIATION	0.0302233	0.214595	0.352488	-0.383774	-1.32585	225
3347	GOBP_NEGATIVE_REGULATION_OF_PROTEIN_SECRETION	0.0302036	0.214595	0.352488	-0.47815	-1.46308	76
8884	GOMF_ADENYLATE_CYCLASE_ACTIVITY	0.0302329	0.214595	0.352488	-0.754427	-1.55194	10
7389	GOBP_TELOMERE_MAINTENANCE_VIA_RECOMBINATION	0.0303069	0.214977	0.352488	0.629784	1.5195	16
2880	GOBP_NEGATIVE_REGULATION_OF_CELL_ADHESION	0.0304136	0.21499	0.287857	-0.363119	-1.28904	291
2968	GOBP_NEGATIVE_REGULATION_OF_DNA_RECOMBINATION	0.0304126	0.21499	0.352488	0.519868	1.45902	29
4547	GOBP_POSITIVE_REGULATION_OF_MACROPHAGE_MIGRATION	0.0303656	0.21499	0.352488	-0.593983	-1.5491	30
6214	GOBP_REGULATION_OF_NITRIC_OXIDE_METABOLIC_PROCESS	0.03043	0.21499	0.352488	-0.473701	-1.43551	73
6774	GOBP_RESPONSE_TO_CATECHOLAMINE	0.0303431	0.21499	0.352488	-0.479326	-1.44335	72
10590	MP_INCREASED_INTESTINAL_ADENOMA_INCIDENCE	0.0303947	0.21499	0.352488	0.574861	1.50426	22
5813	GOBP_REGULATION_OF_FEEDING_BEHAVIOR	0.0304592	0.215054	0.352488	-0.558241	-1.51394	39
1571	GOBP_FOCAL_ADHESION_ASSEMBLY	0.0305083	0.215257	0.352488	-0.462025	-1.42992	83
2441	GOBP_MEMBRANE_REPOLARIZATION_DURING_VENTRICULAR_CARDIAC_MUSCLE_CELL_ACTION_POTENTIAL	0.0306422	0.215773	0.352488	-0.812118	-1.51427	7
2503	GOBP_MICROGLIA_DEVELOPMENT	0.0306152	0.215773	0.352488	0.837847	1.49975	5
10525	GOMF_VOLTAGE_GATED_CALCIUM_CHANNEL_ACTIVITY_INVOLVED_IN_POSITIVE_REGULATION_OF_PRESYNAPTIC_CYTOSOLIC_CALCIUM_LEVELS	0.0306422	0.215773	0.352488	-0.811649	-1.5134	7
10514	GOMF_VINCULIN_BINDING	0.0307219	0.216191	0.352488	-0.740749	-1.58618	12
7529	GOBP_TRNA_CATABOLIC_PROCESS	0.0307526	0.216264	0.352488	0.727543	1.52953	10
4613	GOBP_POSITIVE_REGULATION_OF_MUCUS_SECRETION	0.0307776	0.216297	0.352488	-0.752611	-1.54821	10
8	GOBP_9_CIS_RETINOIC_ACID_METABOLIC_PROCESS	0.0308933	0.216681	0.352488	-0.837918	-1.52696	6
9792	GOMF_NEUREGULIN_BINDING	0.0308933	0.216681	0.352488	-0.837248	-1.52573	6
10049	GOMF_PHOSPHOTRANSFERASE_ACTIVITY_NITROGENOUS_GROUP_AS_ACCEPTOR	0.0308933	0.216681	0.352488	-0.837571	-1.52632	6
9373	GOMF_GATED_CHANNEL_ACTIVITY	0.0309524	0.216952	0.282013	-0.352161	-1.26167	318
264	GOBP_ASTROCYTE_DIFFERENTIATION	0.0310062	0.217043	0.352488	-0.467646	-1.44368	85
2184	GOBP_LEUKOCYTE_PROLIFERATION	0.031001	0.217043	0.352488	-0.357268	-1.28409	348
1554	GOBP_FEMALE_MEIOTIC_NUCLEAR_DIVISION	0.0311682	0.217837	0.352488	0.528653	1.52973	33
4823	GOBP_POSITIVE_REGULATION_OF_RNA_SPLICING	0.0311517	0.217837	0.352488	0.472228	1.44315	42
10150	GOMF_PROTEIN_SERINE_THREONINE_KINASE_BINDING	0.0311809	0.217837	0.352488	0.90672	1.42536	3
22	GOBP_ACROSOME_REACTION	0.0312701	0.218173	0.321776	-0.578804	-1.53319	34
6139	GOBP_REGULATION_OF_MORPHOGENESIS_OF_AN_EPITHELIUM	0.0312557	0.218173	0.321776	-0.478405	-1.44057	72
7762	GOBP_XENOBIOTIC_TRANSPORT_ACROSS_BLOOD_BRAIN_BARRIER	0.0314817	0.219506	0.321776	-0.836498	-1.52437	6
317	GOBP_AXO_DENDRITIC_PROTEIN_TRANSPORT	0.031867	0.220752	0.321776	-0.750184	-1.54322	10
443	GOBP_CAMP_BIOSYNTHETIC_PROCESS	0.0318415	0.220752	0.321776	-0.744485	-1.55513	11
1098	GOBP_DESMOSOME_ORGANIZATION	0.031867	0.220752	0.321776	-0.750414	-1.54369	10
4779	GOBP_POSITIVE_REGULATION_OF_PROTEIN_SERINE_THREONINE_KINASE_ACTIVITY	0.0318679	0.220752	0.321776	-0.393875	-1.34192	190
5052	GOBP_PRIMITIVE_ERYTHROCYTE_DIFFERENTIATION	0.0317877	0.220752	0.321776	-0.809469	-1.50933	7
6351	GOBP_REGULATION_OF_PROTEIN_CONTAINING_COMPLEX_ASSEMBLY	0.0316901	0.220752	0.276501	-0.346995	-1.26033	388
6475	GOBP_REGULATION_OF_SEROTONIN_SECRETION	0.031867	0.220752	0.321776	-0.750765	-1.54441	10
6734	GOBP_REPRODUCTIVE_SYSTEM_DEVELOPMENT	0.0317073	0.220752	0.282013	-0.360085	-1.27995	298
8261	GOCC_INTRINSIC_COMPONENT_OF_SYNAPTIC_VESICLE_MEMBRANE	0.0317634	0.220752	0.321776	-0.501287	-1.45226	55
8458	GOCC_OUTER_DYNEIN_ARM	0.0317877	0.220752	0.321776	-0.810895	-1.51199	7
10427	GOMF_TRANSITION_METAL_ION_BINDING	0.0319489	0.221169	0.261664	-0.315996	-1.18577	842
9429	GOMF_G_PROTEIN_COUPLED_GLUTAMATE_RECEPTOR_ACTIVITY	0.0319829	0.22126	0.321776	-0.769866	-1.5381	9
7518	GOBP_TRIGLYCERIDE_CATABOLIC_PROCESS	0.0320313	0.221451	0.321776	0.530859	1.51154	31
2802	GOBP_NEGATIVE_REGULATION_OF_AMYLOID_PRECURSOR_PROTEIN_BIOSYNTHETIC_PROCESS	0.0320702	0.221534	0.321776	-0.834943	-1.52153	6
10346	GOMF_STRUCTURAL_MOLECULE_ACTIVITY	0.032085	0.221534	0.321776	-0.333237	-1.23418	574
2379	GOBP_MATURATION_OF_LSU_RRNA_FROM_TRICISTRONIC_RRNA_TRANSCRIPT_SSU_RRNA_5_8S_RRNA_LSU_RRNA	0.0321829	0.222066	0.321776	0.631494	1.48548	15
2651	GOBP_MORPHOGENESIS_OF_AN_EPITHELIAL_SHEET	0.0322339	0.222274	0.321776	-0.500263	-1.4493	55
4506	GOBP_POSITIVE_REGULATION_OF_LAMELLIPODIUM_ASSEMBLY	0.0323406	0.222865	0.321776	-0.592336	-1.51191	28
1803	GOBP_HEART_PROCESS	0.032419	0.223071	0.282013	-0.374264	-1.30782	248
4908	GOBP_POSITIVE_REGULATION_OF_TOLL_LIKE_RECEPTOR_SIGNALING_PATHWAY	0.0324149	0.223071	0.321776	0.55994	1.54053	27
4997	GOBP_POSITIVE_REGULATION_OF_WOUND_HEALING	0.0324506	0.223071	0.321776	-0.49897	-1.45242	57
9737	GOMF_MOLECULAR_FUNCTION_REGULATOR_ACTIVITY	0.0324544	0.223071	0.252961	-0.300836	-1.14981	1643
8235	GOCC_INTERMEDIATE_FILAMENT	0.0324782	0.223091	0.321776	-0.421188	-1.35901	122
8129	GOCC_EXTRINSIC_COMPONENT_OF_PRESYNAPTIC_MEMBRANE	0.0325296	0.2233	0.321776	-0.767792	-1.53395	9
5176	GOBP_PROTEIN_LOCALIZATION_TO_CHROMOSOME_CENTROMERIC_REGION	0.0325787	0.223349	0.321776	0.56866	1.48803	22
7199	GOBP_SNRNA_PROCESSING	0.0325787	0.223349	0.321776	0.595315	1.51938	20
4294	GOBP_POSITIVE_REGULATION_OF_DNA_REPAIR	0.0326194	0.223484	0.321776	0.365983	1.33388	116
3103	GOBP_NEGATIVE_REGULATION_OF_INTERLEUKIN_2_PRODUCTION	0.0327166	0.224006	0.321776	-0.611793	-1.50097	24
3509	GOBP_NEGATIVE_REGULATION_OF_VASCULAR_WOUND_HEALING	0.0327869	0.224199	0.321776	-0.879807	-1.47227	4
5279	GOBP_PSYCHOMOTOR_BEHAVIOR	0.0327869	0.224199	0.321776	-0.879791	-1.47225	4
3263	GOBP_NEGATIVE_REGULATION_OF_NUCLEAR_DIVISION	0.0328458	0.224457	0.321776	0.425085	1.40354	61
1639	GOBP_GAS_TRANSPORT	0.0328969	0.224662	0.321776	-0.737628	-1.5795	12
4164	GOBP_POSITIVE_REGULATION_OF_CD4_POSITIVE_ALPHA_BETA_T_CELL_PROLIFERATION	0.0329565	0.224924	0.321776	-0.747123	-1.53692	10
4565	GOBP_POSITIVE_REGULATION_OF_MELANOCYTE_DIFFERENTIATION	0.0329813	0.224949	0.321776	-0.835111	-1.45951	5
4104	GOBP_POSITIVE_REGULATION_OF_ASTROCYTE_DIFFERENTIATION	0.0330763	0.225309	0.321776	-0.700027	-1.53413	14
7045	GOBP_RRNA_MODIFICATION	0.0330572	0.225309	0.321776	0.512185	1.43746	29
5501	GOBP_REGULATION_OF_BONE_DEVELOPMENT	0.0332644	0.226155	0.321776	0.731962	1.48393	9
6049	GOBP_REGULATION_OF_MACROPHAGE_FUSION	0.0332411	0.226155	0.321776	0.865215	1.45067	4
10355	GOMF_SULFURTRANSFERASE_ACTIVITY	0.0332644	0.226155	0.321776	0.731873	1.48375	9
6875	GOBP_RESPONSE_TO_MURAMYL_DIPEPTIDE	0.033342	0.226538	0.321776	0.621017	1.52352	17
454	GOBP_CARBOHYDRATE_BIOSYNTHETIC_PROCESS	0.033432	0.226919	0.321776	-0.389726	-1.32778	190
7633	GOBP_UTERINE_SMOOTH_MUSCLE_CONTRACTION	0.0334406	0.226919	0.321776	-0.737347	-1.5789	12
5444	GOBP_REGULATION_OF_ANION_CHANNEL_ACTIVITY	0.0335027	0.227072	0.321776	-0.74091	-1.54766	11
8715	GOCC_SYMMETRIC_SYNAPSE	0.0335059	0.227072	0.321776	-0.805034	-1.50106	7
4398	GOBP_POSITIVE_REGULATION_OF_GLYCOGEN_STARCH_SYNTHASE_ACTIVITY	0.0335756	0.22711	0.321776	-0.83388	-1.45736	5
8220	GOCC_INSULIN_LIKE_GROWTH_FACTOR_BINDING_PROTEIN_COMPLEX	0.0335756	0.22711	0.321776	-0.834468	-1.45839	5
9310	GOMF_EXONUCLEASE_ACTIVITY	0.0335548	0.22711	0.321776	0.425118	1.42064	67
1430	GOBP_ERYTHROCYTE_HOMEOSTASIS	0.0336927	0.227758	0.287857	-0.402852	-1.34001	146
224	GOBP_APICAL_JUNCTION_ASSEMBLY	0.0337832	0.227935	0.321776	-0.468697	-1.43357	77
8470	GOCC_PCG_PROTEIN_COMPLEX	0.0337761	0.227935	0.321776	0.482121	1.49648	44
9308	GOMF_EXODEOXYRIBONUCLEASE_ACTIVITY	0.0337419	0.227935	0.321776	0.591215	1.49228	19
3435	GOBP_NEGATIVE_REGULATION_OF_SYNAPTIC_PLASTICITY	0.0338355	0.228143	0.321776	-0.832161	-1.51646	6
437	GOBP_CALCIUM_MEDIATED_SIGNALING	0.033867	0.228211	0.321776	-0.398846	-1.35163	177
5931	GOBP_REGULATION_OF_HYDROLASE_ACTIVITY	0.0340064	0.229005	0.252961	-0.315349	-1.18472	865
7053	GOBP_SALIVARY_GLAND_DEVELOPMENT	0.0340361	0.22906	0.321776	-0.538146	-1.47584	41
4449	GOBP_POSITIVE_REGULATION_OF_HYDROLASE_ACTIVITY	0.0341297	0.229545	0.261664	-0.335052	-1.23274	509
560	GOBP_CELLULAR_EXTRAVASATION	0.0342284	0.229628	0.321776	0.406303	1.36346	76
3983	GOBP_PHOTORECEPTOR_CELL_DIFFERENTIATION	0.0342284	0.229628	0.321776	0.406386	1.36374	76
4851	GOBP_POSITIVE_REGULATION_OF_SMOOTH_MUSCLE_CELL_APOPTOTIC_PROCESS	0.0341697	0.229628	0.321776	-0.694817	-1.52272	14
5883	GOBP_REGULATION_OF_HEART_CONTRACTION	0.0342047	0.229628	0.321776	-0.391623	-1.34271	197
1696	GOBP_GLUTAMATE_SECRETION	0.034272	0.229665	0.321776	-0.574574	-1.52199	34
6771	GOBP_RESPONSE_TO_CAMP	0.0342771	0.229665	0.321776	-0.511703	-1.47921	56
2378	GOBP_MATURATION_OF_LSU_RRNA	0.0343329	0.229895	0.321776	0.557007	1.53246	27
1314	GOBP_ENDOCARDIAL_CUSHION_MORPHOGENESIS	0.034358	0.229917	0.321776	-0.554921	-1.50493	39
8561	GOCC_PROTEASOME_CORE_COMPLEX_BETA_SUBUNIT_COMPLEX	0.0343932	0.230009	0.321776	0.692992	1.51625	11
10449	GOMF_TRIGLYCERIDE_LIPASE_ACTIVITY	0.0344813	0.230453	0.321776	0.57167	1.51573	23
1904	GOBP_HOMEOSTASIS_OF_NUMBER_OF_CELLS_WITHIN_A_TISSUE	0.0345258	0.230461	0.321776	-0.544927	-1.47017	38
3318	GOBP_NEGATIVE_REGULATION_OF_PROTEASOMAL_UBIQUITIN_DEPENDENT_PROTEIN_CATABOLIC_PROCESS	0.0345104	0.230461	0.321776	0.506482	1.48269	34
6891	GOBP_RESPONSE_TO_OXYGEN_LEVELS	0.0345711	0.230617	0.276501	-0.374982	-1.29548	225
7311	GOBP_STRIATED_MUSCLE_CONTRACTION	0.0346667	0.230617	0.282013	-0.391911	-1.31951	164
7530	GOBP_TRNA_METABOLIC_PROCESS	0.0346793	0.230617	0.321776	0.343531	1.2798	147
7588	GOBP_T_CELL_PROLIFERATION	0.0346357	0.230617	0.321776	-0.379935	-1.30955	221
9044	GOMF_CALCIUM_ION_BINDING	0.0346756	0.230617	0.257206	-0.329511	-1.21952	585
9407	GOMF_GPI_LINKED_EPHRIN_RECEPTOR_ACTIVITY	0.0346514	0.230617	0.321776	-0.803069	-1.4974	7
3905	GOBP_PEPTIDYL_LYSINE_OXIDATION	0.034764	0.230702	0.321776	-0.833633	-1.45693	5
5492	GOBP_REGULATION_OF_BLOOD_BRAIN_BARRIER_PERMEABILITY	0.0347607	0.230702	0.321776	-0.788493	-1.5196	8
9152	GOMF_CORECEPTOR_ACTIVITY	0.0347788	0.230702	0.321776	0.54437	1.478	26
10131	GOMF_PROTEIN_LYSINE_6_OXIDASE_ACTIVITY	0.034764	0.230702	0.321776	-0.833633	-1.45693	5
460	GOBP_CARBOHYDRATE_HOMEOSTASIS	0.0348259	0.230717	0.271289	-0.37039	-1.295	252
746	GOBP_CELL_DIFFERENTIATION_INVOLVED_IN_KIDNEY_DEVELOPMENT	0.0348453	0.230717	0.321776	-0.515089	-1.46948	51
1362	GOBP_ENDOTHELIUM_DEVELOPMENT	0.0348675	0.230717	0.287857	-0.415306	-1.35749	134
4215	GOBP_POSITIVE_REGULATION_OF_CENTRIOLE_REPLICATION	0.0348678	0.230717	0.321776	0.757262	1.5208	8
4258	GOBP_POSITIVE_REGULATION_OF_CYTOKINESIS	0.0348955	0.230757	0.321776	0.497345	1.49135	38
3126	GOBP_NEGATIVE_REGULATION_OF_KERATINOCYTE_DIFFERENTIATION	0.0349259	0.230786	0.321776	0.729427	1.47879	9
6393	GOBP_REGULATION_OF_PROTEIN_SERINE_THREONINE_KINASE_ACTIVITY	0.0349433	0.230786	0.321776	-0.354923	-1.27243	329
8502	GOCC_PIGMENT_GRANULE	0.0349816	0.230896	0.321776	-0.56493	-1.49095	32
2040	GOBP_INTERLEUKIN_4_PRODUCTION	0.0350974	0.231183	0.321776	-0.554996	-1.48883	37
3717	GOBP_NUCLEOSOME_ORGANIZATION	0.0351119	0.231183	0.321776	0.409928	1.37729	72
6450	GOBP_REGULATION_OF_RETROGRADE_TRANSPORT_ENDOSOME_TO_GOLGI	0.0350708	0.231183	0.321776	0.864235	1.44903	4
7701	GOBP_VESICLE_ORGANIZATION	0.0350665	0.231183	0.266351	-0.358451	-1.27443	289
702	GOBP_CELLULAR_RESPONSE_TO_X_RAY	0.035164	0.231382	0.321776	-0.738244	-1.54209	11
8875	GOMF_ACYLGLYCEROL_O_ACYLTRANSFERASE_ACTIVITY	0.035212	0.231555	0.321776	0.607462	1.51717	18
8796	GOCC_VESICLE_LUMEN	0.0352789	0.231851	0.321776	0.672792	1.55005	13
5324	GOBP_PYRIMIDINE_CONTAINING_COMPOUND_BIOSYNTHETIC_PROCESS	0.0355936	0.233631	0.321776	0.536479	1.49303	28
6391	GOBP_REGULATION_OF_PROTEIN_POLYUBIQUITINATION	0.0355936	0.233631	0.321776	0.537323	1.49538	28
3638	GOBP_NLRP3_INFLAMMASOME_COMPLEX_ASSEMBLY	0.0358843	0.235394	0.321776	0.586702	1.48089	19
5776	GOBP_REGULATION_OF_EPITHELIAL_CELL_PROLIFERATION	0.0359629	0.235619	0.257206	-0.343688	-1.25159	398
7774	GOCC_90S_PRERIBOSOME	0.0359446	0.235619	0.321776	0.54198	1.47151	26
4385	GOBP_POSITIVE_REGULATION_OF_GLIAL_CELL_PROLIFERATION	0.0361126	0.236454	0.321776	-0.592109	-1.50486	27
757	GOBP_CELL_GROWTH	0.0362401	0.237143	0.252961	-0.332068	-1.22195	490
8629	GOCC_RUFFLE	0.0362695	0.237189	0.321776	-0.406681	-1.35275	146
7533	GOBP_TRNA_PROCESSING	0.0363597	0.237633	0.321776	0.376058	1.33377	101
1382	GOBP_EPHRIN_RECEPTOR_SIGNALING_PATHWAY	0.0364702	0.237811	0.321776	-0.572419	-1.5132	33
2177	GOBP_LEUKOCYTE_DEGRANULATION	0.0364964	0.237811	0.287857	-0.449656	-1.39164	83
4887	GOBP_POSITIVE_REGULATION_OF_SYNAPTIC_VESICLE_CLUSTERING	0.0364563	0.237811	0.321776	-0.785673	-1.51417	8
6421	GOBP_REGULATION_OF_RELEASE_OF_SEQUESTERED_CALCIUM_ION_INTO_CYTOSOL	0.0364679	0.237811	0.321776	-0.470422	-1.43943	76
8000	GOCC_CUL4A_RING_E3_UBIQUITIN_LIGASE_COMPLEX	0.0364986	0.237811	0.321776	0.678994	1.52755	12
5951	GOBP_REGULATION_OF_INSULIN_SECRETION	0.0365535	0.238023	0.271289	-0.389437	-1.31886	172
3087	GOBP_NEGATIVE_REGULATION_OF_INFLAMMATORY_RESPONSE	0.0366197	0.238308	0.282013	-0.409167	-1.33347	133
3173	GOBP_NEGATIVE_REGULATION_OF_MAPK_CASCADE	0.0366972	0.238667	0.271289	-0.388267	-1.3156	173
10528	GOMF_VOLTAGE_GATED_CHANNEL_ACTIVITY	0.0367599	0.238928	0.321776	-0.391175	-1.33799	195
7885	GOCC_CATENIN_COMPLEX	0.0367842	0.23894	0.321776	-0.58463	-1.52471	30
5235	GOBP_PROTEIN_POLYUBIQUITINATION	0.0368944	0.23951	0.321776	0.313779	1.23471	225
5237	GOBP_PROTEIN_POLY_ADP_RIBOSYLATION	0.0369216	0.23954	0.321776	0.726921	1.47371	9
378	GOBP_BRAIN_MORPHOGENESIS	0.0369744	0.239737	0.321776	-0.536518	-1.47137	41
10089	GOMF_PROCOLLAGEN_PROLINE_DIOXYGENASE_ACTIVITY	0.0370215	0.239895	0.321776	-0.78369	-1.51034	8
5795	GOBP_REGULATION_OF_EXOCYTOSIS	0.0371155	0.240358	0.321776	-0.382075	-1.32958	237
3368	GOBP_NEGATIVE_REGULATION_OF_REPRODUCTIVE_PROCESS	0.0371873	0.240677	0.321776	-0.473712	-1.42644	72
10537	GOMF_WATER_CHANNEL_ACTIVITY	0.0372468	0.240915	0.321776	-0.733104	-1.56981	12
2141	GOBP_LAMELLIPODIUM_ASSEMBLY	0.037297	0.241093	0.321776	-0.476133	-1.42147	69
441	GOBP_CAMERA_TYPE_EYE_PHOTORECEPTOR_CELL_DIFFERENTIATION	0.037496	0.241922	0.321776	0.49408	1.46259	36
722	GOBP_CELL_CELL_ADHESION_VIA_PLASMA_MEMBRANE_ADHESION_MOLECULES	0.0375162	0.241922	0.266351	-0.380254	-1.3003	196
1330	GOBP_ENDODERM_DEVELOPMENT	0.0374813	0.241922	0.287857	-0.458412	-1.39608	74
7197	GOBP_SNRNA_METABOLIC_PROCESS	0.037501	0.241922	0.321776	0.466245	1.42486	42
3053	GOBP_NEGATIVE_REGULATION_OF_G_PROTEIN_COUPLED_RECEPTOR_SIGNALING_PATHWAY	0.0375865	0.242083	0.321776	-0.499374	-1.45835	58
4818	GOBP_POSITIVE_REGULATION_OF_RHO_PROTEIN_SIGNAL_TRANSDUCTION	0.0375866	0.242083	0.321776	-0.560463	-1.47476	31
4661	GOBP_POSITIVE_REGULATION_OF_NF_KAPPAB_TRANSCRIPTION_FACTOR_ACTIVITY	0.0376942	0.242629	0.321776	0.341438	1.28004	152
28	GOBP_ACTIN_FILAMENT_BUNDLE_ORGANIZATION	0.037884	0.243556	0.321776	-0.400887	-1.3561	167
342	GOBP_BIOLOGICAL_PROCESS_INVOLVED_IN_INTERACTION_WITH_SYMBIONT	0.0378665	0.243556	0.321776	0.382936	1.33267	89
7300	GOBP_STRESS_FIBER_ASSEMBLY	0.0379115	0.243586	0.321776	-0.427278	-1.37462	111
9364	GOMF_GALACTOSIDASE_ACTIVITY	0.0379545	0.243715	0.321776	-0.8264	-1.50596	6
7501	GOBP_TRANSMISSION_OF_NERVE_IMPULSE	0.0380117	0.243894	0.282013	-0.434948	-1.36897	97
10137	GOMF_PROTEIN_N_TERMINUS_BINDING	0.0380282	0.243894	0.276501	-0.417089	-1.35464	128
2732	GOBP_MYELOID_LEUKOCYTE_MIGRATION	0.0382483	0.244779	0.321776	0.312723	1.23109	226
4271	GOBP_POSITIVE_REGULATION_OF_DEFENSE_RESPONSE_TO_VIRUS_BY_HOST	0.0382583	0.244779	0.321776	0.534381	1.50451	30
5292	GOBP_PURINE_DEOXYRIBONUCLEOSIDE_MONOPHOSPHATE_CATABOLIC_PROCESS	0.038252	0.244779	0.321776	0.72554	1.47091	9
5340	GOBP_PYRIMIDINE_NUCLEOSIDE_DIPHOSPHATE_METABOLIC_PROCESS	0.038252	0.244779	0.321776	0.725233	1.47029	9
466	GOBP_CARBOHYDRATE_TRANSPORT	0.0384088	0.245153	0.271289	-0.406284	-1.34194	141
1723	GOBP_GLYCOPROTEIN_BIOSYNTHETIC_PROCESS	0.0383663	0.245153	0.257206	-0.367481	-1.28926	260
5701	GOBP_REGULATION_OF_DENDRITE_MORPHOGENESIS	0.0384047	0.245153	0.282013	-0.442771	-1.3731	87
7433	GOBP_TIGHT_JUNCTION_ORGANIZATION	0.0383481	0.245153	0.282013	-0.448777	-1.38092	80
5563	GOBP_REGULATION_OF_CD4_POSITIVE_ALPHA_BETA_T_CELL_ACTIVATION	0.0385445	0.245777	0.321776	-0.459921	-1.40067	74
9443	GOMF_H4_HISTONE_ACETYLTRANSFERASE_ACTIVITY	0.0385759	0.245777	0.321776	0.663133	1.5278	13
10252	GOMF_SECONDARY_ACTIVE_TRANSMEMBRANE_TRANSPORTER_ACTIVITY	0.0385604	0.245777	0.261664	-0.375258	-1.29211	218
4511	GOBP_POSITIVE_REGULATION_OF_LEUKOCYTE_CELL_CELL_ADHESION	0.0387016	0.245872	0.257206	-0.36947	-1.28921	247
7924	GOCC_CHROMATIN	0.0386362	0.245872	0.321776	0.267021	1.13206	552
8075	GOCC_ENDOPEPTIDASE_COMPLEX	0.0386916	0.245872	0.321776	0.367603	1.28203	94
8644	GOCC_SECRETORY_GRANULE	0.0386417	0.245872	0.248911	-0.345835	-1.2514	369
9661	GOMF_MACROLIDE_BINDING	0.0387063	0.245872	0.321776	0.75413	1.51451	8
6451	GOBP_REGULATION_OF_RHO_DEPENDENT_PROTEIN_SERINE_THREONINE_KINASE_ACTIVITY	0.0388881	0.246879	0.321776	0.811511	1.53098	6
2452	GOBP_MESENCHYMAL_CELL_PROLIFERATION	0.0390049	0.247473	0.321776	-0.50786	-1.4681	56
3153	GOBP_NEGATIVE_REGULATION_OF_LOCOMOTION	0.039239	0.248514	0.248911	-0.348084	-1.24889	331
5582	GOBP_REGULATION_OF_CELLULAR_PH_REDUCTION	0.0392333	0.248514	0.321776	-0.797296	-1.48663	7
7813	GOCC_APICAL_PART_OF_CELL	0.0392157	0.248514	0.245042	-0.337399	-1.2343	435
5559	GOBP_REGULATION_OF_CATION_CHANNEL_ACTIVITY	0.0393185	0.248721	0.261664	-0.385174	-1.30704	187
6417	GOBP_REGULATION_OF_REGULATED_SECRETORY_PATHWAY	0.0393185	0.248721	0.261664	-0.386112	-1.30738	178
8448	GOCC_OMEGASOME	0.0393461	0.248748	0.321776	0.752418	1.51107	8
5842	GOBP_REGULATION_OF_GLIAL_CELL_PROLIFERATION	0.0394873	0.249492	0.321776	-0.517593	-1.47555	52
983	GOBP_CORTICAL_ACTIN_CYTOSKELETON_ORGANIZATION	0.0395779	0.24987	0.321776	-0.549846	-1.47501	37
8326	GOCC_MICROFIBRIL	0.039594	0.24987	0.321776	-0.733899	-1.53301	11
603	GOBP_CELLULAR_RESPONSE_TO_BIOTIC_STIMULUS	0.0397397	0.250195	0.321776	0.31906	1.22572	200
2127	GOBP_KIDNEY_MORPHOGENESIS	0.0397059	0.250195	0.276501	-0.425977	-1.35098	103
5513	GOBP_REGULATION_OF_BROWN_FAT_CELL_DIFFERENTIATION	0.0397187	0.250195	0.321776	-0.603378	-1.52355	26
6452	GOBP_REGULATION_OF_RHO_PROTEIN_SIGNAL_TRANSDUCTION	0.0396931	0.250195	0.321776	-0.461949	-1.42681	84
4161	GOBP_POSITIVE_REGULATION_OF_CATION_CHANNEL_ACTIVITY	0.039823	0.250572	0.276501	-0.443451	-1.36967	84
1115	GOBP_DETECTION_OF_MOLECULE_OF_BACTERIAL_ORIGIN	0.039847	0.250574	0.321776	0.673671	1.51558	12
1268	GOBP_ELASTIC_FIBER_ASSEMBLY	0.0399655	0.250875	0.321776	-0.730598	-1.56444	12
2879	GOBP_NEGATIVE_REGULATION_OF_CELL_ACTIVATION	0.0399485	0.250875	0.257206	-0.377626	-1.29714	214
10409	GOMF_TRANSCRIPTION_COACTIVATOR_BINDING	0.0399361	0.250875	0.287857	-0.504177	-1.42906	48
7579	GOBP_T_CELL_DIFFERENTIATION_IN_THYMUS	0.04	0.250943	0.276501	-0.426426	-1.34857	102
3302	GOBP_NEGATIVE_REGULATION_OF_PHOSPHORUS_METABOLIC_PROCESS	0.0400916	0.251207	0.24134	-0.341429	-1.24915	417
4741	GOBP_POSITIVE_REGULATION_OF_PROTEIN_CONTAINING_COMPLEX_ASSEMBLY	0.0401035	0.251207	0.257206	-0.384426	-1.30785	184
9909	GOMF_OXIDOREDUCTASE_ACTIVITY_ACTING_ON_METAL_IONS_OXYGEN_AS_ACCEPTOR	0.0401129	0.251207	0.321776	0.810259	1.52862	6
147	GOBP_AMINO_SUGAR_METABOLIC_PROCESS	0.0403877	0.252631	0.287857	-0.516585	-1.41099	40
1387	GOBP_EPIDERMIS_MORPHOGENESIS	0.0403877	0.252631	0.287857	-0.515063	-1.40683	40
6371	GOBP_REGULATION_OF_PROTEIN_LOCALIZATION_TO_CELL_PERIPHERY	0.0404463	0.2527	0.266351	-0.407346	-1.33147	134
9581	GOMF_KINASE_INHIBITOR_ACTIVITY	0.0404232	0.2527	0.321776	-0.506013	-1.46276	56
7366	GOBP_SYNAPTIC_VESICLE_PRIMING	0.0405186	0.252756	0.287857	-0.591708	-1.49408	26
8045	GOCC_DEUTEROSOME	0.04056	0.252756	0.321776	0.858972	1.4402	4
8982	GOMF_ATP_DEPENDENT_ACTIVITY	0.0405739	0.252756	0.321776	0.271546	1.1438	494
9194	GOMF_CYTOSKELETON_NUCLEAR_MEMBRANE_ANCHOR_ACTIVITY	0.04056	0.252756	0.321776	0.858231	1.43896	4
9850	GOMF_NUCLEOSIDE_TRIPHOSPHATASE_REGULATOR_ACTIVITY	0.0405562	0.252756	0.24134	-0.33895	-1.23539	402
6297	GOBP_REGULATION_OF_PHOSPHORUS_METABOLIC_PROCESS	0.0406838	0.253292	0.321776	-0.309484	-1.17644	1318
7550	GOBP_TUBE_FORMATION	0.0407895	0.253801	0.257206	-0.384152	-1.29964	181
936	GOBP_COLLAGEN_FIBRIL_ORGANIZATION	0.0408805	0.25407	0.282013	-0.490293	-1.41732	56
6533	GOBP_REGULATION_OF_STRIATED_MUSCLE_CONTRACTION	0.0408759	0.25407	0.271289	-0.443079	-1.37128	83
399	GOBP_BUD_ELONGATION_INVOLVED_IN_LUNG_BRANCHING	0.0409515	0.254363	0.321776	-0.793911	-1.48032	7
4717	GOBP_POSITIVE_REGULATION_OF_PHOSPHOLIPASE_ACTIVITY	0.0409836	0.254414	0.287857	-0.511713	-1.42051	44
3618	GOBP_NEUTROPHIL_CHEMOTAXIS	0.0411655	0.255313	0.321776	0.37374	1.31309	97
7888	GOCC_CAVEOLA	0.0411765	0.255313	0.271289	-0.437609	-1.36003	90
8714	GOCC_SWR1_COMPLEX	0.0412135	0.255394	0.321776	0.659387	1.51916	13
9700	GOMF_METHYLATED_HISTONE_BINDING	0.0412488	0.255464	0.321776	0.419863	1.40308	67
2524	GOBP_MICROVILLUS_ORGANIZATION	0.0413223	0.255622	0.287857	-0.60233	-1.49888	25
8301	GOCC_MALE_GERM_CELL_NUCLEUS	0.0413221	0.255622	0.321776	0.409744	1.37421	69
1951	GOBP_IMMUNE_RESPONSE_REGULATING_CELL_SURFACE_RECEPTOR_SIGNALING_PATHWAY	0.0413972	0.255936	0.252961	-0.37802	-1.29426	203
3980	GOBP_PHOSPHORYLATION	0.0416667	0.257005	0.222056	-0.295609	-1.13053	1720
6008	GOBP_REGULATION_OF_LIPASE_ACTIVITY	0.0416667	0.257005	0.271289	-0.452654	-1.38507	76
7652	GOBP_VASCULAR_ASSOCIATED_SMOOTH_MUSCLE_CELL_PROLIFERATION	0.0416025	0.257005	0.276501	-0.464727	-1.39036	70
10519	GOMF_VITAMIN_D_25_HYDROXYLASE_ACTIVITY	0.041648	0.257005	0.321776	-0.872798	-1.46054	4
3371	GOBP_NEGATIVE_REGULATION_OF_RESPONSE_TO_CYTOKINE_STIMULUS	0.0417459	0.257344	0.321776	0.414985	1.3702	61
854	GOBP_CHEMOKINE_PRODUCTION	0.0418433	0.257348	0.321776	0.371305	1.31199	99
3999	GOBP_PIGMENT_METABOLIC_PROCESS	0.0417957	0.257348	0.276501	-0.480794	-1.4181	62
7123	GOBP_SEX_DIFFERENTIATION	0.0418204	0.257348	0.245042	-0.360063	-1.2663	265
7267	GOBP_SPLICEOSOMAL_COMPLEX_ASSEMBLY	0.0418058	0.257348	0.321776	0.469733	1.45803	44
10273	GOMF_SIGNALING_ADAPTOR_ACTIVITY	0.041979	0.258034	0.271289	-0.45845	-1.38929	73
2084	GOBP_IN_UTERO_EMBRYONIC_DEVELOPMENT	0.0420933	0.258587	0.234393	-0.330797	-1.21708	509
97	GOBP_ADULT_LOCOMOTORY_BEHAVIOR	0.0421512	0.258644	0.266351	-0.419652	-1.34178	107
7901	GOCC_CELL_CORTEX_REGION	0.0421462	0.258644	0.321776	-0.521838	-1.44862	44
2549	GOBP_MITOCHONDRIAL_DNA_REPLICATION	0.0422435	0.258911	0.321776	0.6476	1.52373	14
9500	GOMF_HYDROLASE_ACTIVITY_ACTING_ON_GLYCOSYL_BONDS	0.0422279	0.258911	0.321776	0.344433	1.26073	119
2420	GOBP_MEMBRANE_DISRUPTION_IN_ANOTHER_ORGANISM	0.0422946	0.258927	0.321776	0.896991	1.41006	3
8402	GOCC_NLRP1_INFLAMMASOME_COMPLEX	0.0422946	0.258927	0.321776	0.895815	1.40822	3
8483	GOCC_PHAGOCYTIC_VESICLE	0.0423201	0.258934	0.321776	0.372814	1.3319	102
2482	GOBP_METANEPHRIC_NEPHRON_DEVELOPMENT	0.0423453	0.258939	0.282013	-0.523136	-1.41138	38
6824	GOBP_RESPONSE_TO_HYDROXYUREA	0.0424312	0.259315	0.321776	0.703259	1.47848	10
7836	GOCC_AXONAL_GROWTH_CONE	0.0425049	0.259617	0.321776	-0.533277	-1.45658	40
2695	GOBP_MULTI_CILIATED_EPITHELIAL_CELL_DIFFERENTIATION	0.0425625	0.259819	0.321776	0.807003	1.52248	6
1062	GOBP_DENDRITE_DEVELOPMENT	0.0426309	0.260088	0.24134	-0.356344	-1.26502	292
729	GOBP_CELL_CELL_SIGNALING_INVOLVED_IN_CARDIAC_CONDUCTION	0.0427091	0.260416	0.321776	-0.5774	-1.50586	30
8111	GOCC_EXORIBONUCLEASE_COMPLEX	0.042794	0.260784	0.321776	0.56106	1.48759	23
6927	GOBP_RESPONSE_TO_TRANSFORMING_GROWTH_FACTOR_BETA	0.0428752	0.261129	0.245042	-0.369083	-1.28056	232
1901	GOBP_HISTONE_UBIQUITINATION	0.0429011	0.261137	0.321776	0.445141	1.4298	52
2037	GOBP_INTERLEUKIN_2_PRODUCTION	0.0429448	0.261254	0.271289	-0.467588	-1.39212	67
7168	GOBP_SMAD_PROTEIN_SIGNAL_TRANSDUCTION	0.0430516	0.261754	0.321776	-0.456413	-1.409	85
2303	GOBP_MACROPHAGE_FUSION	0.0431749	0.261818	0.321776	0.806378	1.5213	6
3920	GOBP_PEPTIDYL_TYROSINE_MODIFICATION	0.0431138	0.261818	0.237794	-0.350537	-1.25362	307
4753	GOBP_POSITIVE_REGULATION_OF_PROTEIN_K63_LINKED_UBIQUITINATION	0.0431749	0.261818	0.321776	0.804623	1.51798	6
4760	GOBP_POSITIVE_REGULATION_OF_PROTEIN_LOCALIZATION_TO_CELL_PERIPHERY	0.0432099	0.261818	0.271289	-0.471501	-1.39417	65
7650	GOBP_VASCULAR_ASSOCIATED_SMOOTH_MUSCLE_CELL_DIFFERENTIATION	0.0431301	0.261818	0.321776	-0.543449	-1.47382	39
9301	GOMF_ESTRADIOL_17_BETA_DEHYDROGENASE_ACTIVITY	0.0431954	0.261818	0.321776	0.668323	1.50355	12
5068	GOBP_PROLINE_TRANSMEMBRANE_TRANSPORT	0.0432425	0.261867	0.321776	-0.79206	-1.47687	7
2143	GOBP_LAMELLIPODIUM_ORGANIZATION	0.0433049	0.262096	0.321776	-0.450317	-1.39563	86
344	GOBP_BIOLOGICAL_PROCESS_INVOLVED_IN_INTRASPECIES_INTERACTION_BETWEEN_ORGANISMS	0.0433437	0.262181	0.271289	-0.475696	-1.39977	60
1805	GOBP_HEART_TRABECULA_MORPHOGENESIS	0.0434168	0.262346	0.321776	-0.560606	-1.49294	35
7151	GOBP_SKELETAL_MUSCLE_HYPERTROPHY	0.0434203	0.262346	0.321776	-0.870042	-1.45593	4
2653	GOBP_MORPHOGENESIS_OF_A_BRANCHING_STRUCTURE	0.0434783	0.262399	0.24134	-0.366875	-1.28228	251
5443	GOBP_REGULATION_OF_ANIMAL_ORGAN_MORPHOGENESIS	0.0434783	0.262399	0.257206	-0.411526	-1.33927	129
6321	GOBP_REGULATION_OF_POSTSYNAPTIC_MEMBRANE_NEUROTRANSMITTER_RECEPTOR_LEVELS	0.0435561	0.262719	0.321776	-0.440399	-1.3687	90
1383	GOBP_EPIBOLY	0.0436966	0.263268	0.321776	-0.575402	-1.50064	30
6691	GOBP_REGULATION_OF_VOLTAGE_GATED_CALCIUM_CHANNEL_ACTIVITY	0.0436882	0.263268	0.321776	-0.508069	-1.42723	46
1468	GOBP_ESTABLISHMENT_OR_MAINTENANCE_OF_CELL_POLARITY	0.043758	0.263489	0.245042	-0.369824	-1.2747	221
6608	GOBP_REGULATION_OF_TRANSCRIPTION_REGULATORY_REGION_DNA_BINDING	0.0438312	0.26378	0.276501	-0.499297	-1.41558	49
431	GOBP_CALCIUM_ION_REGULATED_EXOCYTOSIS_OF_NEUROTRANSMITTER	0.0439932	0.264158	0.282013	-0.624387	-1.49366	22
1396	GOBP_EPITHELIAL_CELL_DIFFERENTIATION_INVOLVED_IN_KIDNEY_DEVELOPMENT	0.0439739	0.264158	0.276501	-0.514395	-1.4107	41
5484	GOBP_REGULATION_OF_BEHAVIOR	0.0439883	0.264158	0.261664	-0.42546	-1.34419	99
6477	GOBP_REGULATION_OF_SHORT_TERM_NEURONAL_SYNAPTIC_PLASTICITY	0.0439932	0.264158	0.282013	-0.637236	-1.48577	20
2662	GOBP_MOVEMENT_IN_HOST	0.0440722	0.264483	0.321776	0.362074	1.29749	107
754	GOBP_CELL_FATE_DETERMINATION	0.0443202	0.265672	0.321776	-0.526971	-1.44519	41
8533	GOCC_POSTSYNAPTIC_SPECIALIZATION_INTRACELLULAR_COMPONENT	0.0443202	0.265672	0.321776	-0.53208	-1.43551	38
3858	GOBP_PARATHYROID_GLAND_DEVELOPMENT	0.0443879	0.265778	0.321776	-0.790376	-1.47373	7
8215	GOCC_INNER_DYNEIN_ARM	0.0443691	0.265778	0.321776	-0.775871	-1.49527	8
6849	GOBP_RESPONSE_TO_ISCHEMIA	0.0445562	0.266258	0.321776	-0.544377	-1.46034	37
7181	GOBP_SMOOTH_MUSCLE_CELL_APOPTOTIC_PROCESS	0.0445545	0.266258	0.276501	-0.571327	-1.47468	29
9422	GOMF_G_PROTEIN_ACTIVITY	0.0445562	0.266258	0.321776	-0.544402	-1.46041	37
9882	GOMF_ORGANIC_ACID_BINDING	0.0445682	0.266258	0.252961	-0.406569	-1.33045	135
2898	GOBP_NEGATIVE_REGULATION_OF_CELL_JUNCTION_ASSEMBLY	0.0446841	0.266502	0.321776	-0.573319	-1.49521	30
3084	GOBP_NEGATIVE_REGULATION_OF_IMMUNE_SYSTEM_PROCESS	0.0446735	0.266502	0.227987	-0.338595	-1.23863	419
7310	GOBP_STRIATED_MUSCLE_CELL_PROLIFERATION	0.0446429	0.266502	0.261664	-0.446318	-1.36568	76
34	GOBP_ACTIN_MEDIATED_CELL_CONTRACTION	0.044751	0.266602	0.321776	-0.437094	-1.37342	96
670	GOBP_CELLULAR_RESPONSE_TO_OXYGEN_CONTAINING_COMPOUND	0.0447451	0.266602	0.216543	-0.308306	-1.16633	1003
821	GOBP_CEREBELLAR_CORTEX_MORPHOGENESIS	0.0448	0.266744	0.271289	-0.510827	-1.41326	42
2860	GOBP_NEGATIVE_REGULATION_OF_CATALYTIC_ACTIVITY	0.044843	0.266746	0.224966	-0.32654	-1.20821	566
7675	GOBP_VENTRICULAR_CARDIAC_MUSCLE_CELL_MEMBRANE_REPOLARIZATION	0.0448505	0.266746	0.276501	-0.605309	-1.48507	24
4044	GOBP_POLYOL_BIOSYNTHETIC_PROCESS	0.0448916	0.266842	0.266351	-0.474469	-1.39616	60
4448	GOBP_POSITIVE_REGULATION_OF_HYDROGEN_PEROXIDE_METABOLIC_PROCESS	0.0449343	0.266946	0.321776	-0.774995	-1.49359	8
6068	GOBP_REGULATION_OF_MELANOCYTE_DIFFERENTIATION	0.0449607	0.266954	0.321776	-0.789647	-1.47237	7
6900	GOBP_RESPONSE_TO_POTASSIUM_ION	0.0451315	0.267819	0.321776	-0.723959	-1.51225	11
3567	GOBP_NEURONAL_SIGNAL_TRANSDUCTION	0.0451925	0.268031	0.321776	-0.86742	-1.45154	4
5255	GOBP_PROTEIN_TETRAMERIZATION	0.0452573	0.268266	0.321776	0.385391	1.303	81
5060	GOBP_PROGESTERONE_RECEPTOR_SIGNALING_PATHWAY	0.0452899	0.26831	0.287857	-0.734596	-1.51115	10
498	GOBP_CARDIAC_NEURAL_CREST_CELL_MIGRATION_INVOLVED_IN_OUTFLOW_TRACT_MORPHOGENESIS	0.0459466	0.268316	0.321776	-0.721678	-1.54534	12
1109	GOBP_DETECTION_OF_LIGHT_STIMULUS	0.0458641	0.268316	0.321776	-0.509235	-1.45172	52
1328	GOBP_ENDODERMAL_CELL_FATE_COMMITMENT	0.0454545	0.268316	0.282013	-0.682915	-1.51766	15
1372	GOBP_ENTRY_INTO_HOST	0.0457649	0.268316	0.321776	0.382518	1.33355	90
1806	GOBP_HEART_VALVE_DEVELOPMENT	0.0454096	0.268316	0.321776	-0.48953	-1.4182	55
1954	GOBP_IMMUNE_RESPONSE_TO_TUMOR_CELL	0.045939	0.268316	0.321776	-0.582225	-1.47973	27
2051	GOBP_INTERPHASE	0.0454394	0.268316	0.321776	0.854778	1.43317	4
2606	GOBP_MITOTIC_SPINDLE_ORGANIZATION	0.0455015	0.268316	0.321776	0.36147	1.29532	107
2763	GOBP_NATURAL_KILLER_CELL_MEDIATED_IMMUNE_RESPONSE_TO_TUMOR_CELL	0.0456853	0.268316	0.321776	-0.723339	-1.51096	11
3185	GOBP_NEGATIVE_REGULATION_OF_MESENCHYMAL_CELL_APOPTOTIC_PROCESS	0.0459466	0.268316	0.321776	-0.723347	-1.54892	12
4093	GOBP_POSITIVE_REGULATION_OF_ANION_TRANSPORT	0.0455975	0.268316	0.266351	-0.479266	-1.38544	56
4362	GOBP_POSITIVE_REGULATION_OF_FEAR_RESPONSE	0.0456853	0.268316	0.321776	-0.723346	-1.51097	11
4852	GOBP_POSITIVE_REGULATION_OF_SMOOTH_MUSCLE_CELL_DIFFERENTIATION	0.0457875	0.268316	0.287857	-0.695966	-1.50914	13
4855	GOBP_POSITIVE_REGULATION_OF_SMOOTH_MUSCLE_CONTRACTION	0.0457792	0.268316	0.321776	-0.557843	-1.47767	34
5730	GOBP_REGULATION_OF_DNA_RECOMBINATION	0.0456232	0.268316	0.321776	0.364492	1.286	98
6160	GOBP_REGULATION_OF_MYELINATION	0.045677	0.268316	0.271289	-0.485371	-1.38369	52
6682	GOBP_REGULATION_OF_VESICLE_MEDIATED_TRANSPORT	0.0458101	0.268316	0.222056	-0.325225	-1.20456	580
7186	GOBP_SMOOTH_MUSCLE_CELL_PROLIFERATION	0.0455729	0.268316	0.24134	-0.382539	-1.29636	177
7462	GOBP_TRABECULA_MORPHOGENESIS	0.0454096	0.268316	0.321776	-0.489747	-1.41883	55
7487	GOBP_TRANSFORMING_GROWTH_FACTOR_BETA_PRODUCTION	0.0456026	0.268316	0.271289	-0.521416	-1.40673	38
9348	GOMF_FLOPPASE_ACTIVITY	0.0456041	0.268316	0.321776	-0.820319	-1.49488	6
9501	GOMF_HYDROLASE_ACTIVITY_HYDROLYZING_N_GLYCOSYL_COMPOUNDS	0.0459393	0.268316	0.321776	0.50671	1.4868	35
9535	GOMF_INSULIN_LIKE_GROWTH_FACTOR_I_BINDING	0.0457875	0.268316	0.287857	-0.695638	-1.50843	13
9565	GOMF_IRON_ION_BINDING	0.045911	0.268316	0.252961	-0.412708	-1.329	116
9933	GOMF_OXIDOREDUCTASE_ACTIVITY_ACTING_ON_THE_CH_NH2_GROUP_OF_DONORS	0.0456942	0.268316	0.282013	-0.660017	-1.49447	17
10307	GOMF_SOLUTE_POTASSIUM_ANTIPORTER_ACTIVITY	0.0454545	0.268316	0.287857	-0.692118	-1.5168	14
6709	GOBP_RENAL_FILTRATION	0.045977	0.268346	0.271289	-0.578216	-1.47587	28
6488	GOBP_REGULATION_OF_SKELETAL_MUSCLE_SATELLITE_CELL_PROLIFERATION	0.0460405	0.268423	0.287857	-0.714732	-1.49298	11
7419	GOBP_THROMBIN_ACTIVATED_RECEPTOR_SIGNALING_PATHWAY	0.0460405	0.268423	0.287857	-0.714356	-1.49219	11
2527	GOBP_MIDBRAIN_DEVELOPMENT	0.0461289	0.26879	0.321776	-0.510105	-1.44623	49
6541	GOBP_REGULATION_OF_SYNAPSE_ASSEMBLY	0.0462428	0.269012	0.252961	-0.414742	-1.33514	113
8033	GOCC_DENDRITIC_SHAFT	0.046225	0.269012	0.261664	-0.4713	-1.39164	61
9094	GOMF_CCR_CHEMOKINE_RECEPTOR_BINDING	0.0462046	0.269012	0.271289	-0.551694	-1.45602	32
1789	GOBP_HAIR_CELL_DIFFERENTIATION	0.0464396	0.269531	0.261664	-0.467779	-1.37971	62
1841	GOBP_HINDBRAIN_DEVELOPMENT	0.0464585	0.269531	0.321776	-0.393944	-1.33619	169
1917	GOBP_HORMONE_TRANSPORT	0.0464839	0.269531	0.227987	-0.343808	-1.23571	348
2375	GOBP_MATING_BEHAVIOR	0.0464744	0.269531	0.266351	-0.50049	-1.4121	47
4422	GOBP_POSITIVE_REGULATION_OF_HEMOPOIESIS	0.0464516	0.269531	0.237794	-0.378528	-1.29195	191
6481	GOBP_REGULATION_OF_SKELETAL_MUSCLE_ACETYLCHOLINE_GATED_CHANNEL_CLUSTERING	0.0463835	0.269531	0.321776	0.745109	1.49639	8
322	GOBP_BASEMENT_MEMBRANE_ORGANIZATION	0.0465475	0.269752	0.321776	-0.54167	-1.45308	37
7561	GOBP_TYPE_II_HYPERSENSITIVITY	0.0466592	0.270253	0.321776	0.85393	1.43175	4
4141	GOBP_POSITIVE_REGULATION_OF_CALCIUM_ION_TRANSMEMBRANE_TRANSPORTER_ACTIVITY	0.0467358	0.270549	0.321776	-0.541453	-1.50675	45
6555	GOBP_REGULATION_OF_SYNAPTIC_VESICLE_EXOCYTOSIS	0.0467978	0.27076	0.321776	-0.457972	-1.41452	84
5155	GOBP_PROTEIN_K63_LINKED_UBIQUITINATION	0.0468779	0.271077	0.321776	0.414167	1.36037	60
383	GOBP_BRANCHED_CHAIN_AMINO_ACID_TRANSPORT	0.0472727	0.271882	0.282013	-0.754267	-1.50693	9
1558	GOBP_FERTILIZATION	0.0471204	0.271882	0.237794	-0.382292	-1.29484	180
3419	GOBP_NEGATIVE_REGULATION_OF_SPROUTING_ANGIOGENESIS	0.0472727	0.271882	0.282013	-0.689704	-1.51151	14
3436	GOBP_NEGATIVE_REGULATION_OF_SYNAPTIC_TRANSMISSION	0.0470755	0.271882	0.321776	-0.454203	-1.40218	85
4171	GOBP_POSITIVE_REGULATION_OF_CELLULAR_CARBOHYDRATE_METABOLIC_PROCESS	0.0471698	0.271882	0.261664	-0.477358	-1.37993	56
5084	GOBP_PROSTATIC_BUD_FORMATION	0.0472727	0.271882	0.282013	-0.755282	-1.50896	9
5293	GOBP_PURINE_DEOXYRIBONUCLEOSIDE_MONOPHOSPHATE_METABOLIC_PROCESS	0.0471481	0.271882	0.321776	0.650915	1.49965	13
6457	GOBP_REGULATION_OF_RNA_POLYMERASE_II_REGULATORY_REGION_SEQUENCE_SPECIFIC_DNA_BINDING	0.0472727	0.271882	0.282013	-0.753968	-1.50633	9
8648	GOCC_SEMAPHORIN_RECEPTOR_COMPLEX	0.0472727	0.271882	0.282013	-0.75491	-1.50821	9
9554	GOMF_INTRAMOLECULAR_OXIDOREDUCTASE_ACTIVITY	0.0472101	0.271882	0.321776	-0.521543	-1.48645	50
10163	GOMF_PROTEIN_TYROSINE_SERINE_THREONINE_PHOSPHATASE_ACTIVITY	0.0473626	0.272252	0.321776	-0.530705	-1.44956	40
6219	GOBP_REGULATION_OF_NMDA_RECEPTOR_ACTIVITY	0.047619	0.27343	0.266351	-0.572623	-1.46159	28
9143	GOMF_COLLAGEN_RECEPTOR_ACTIVITY	0.047619	0.27343	0.287857	-0.785244	-1.46416	7
10291	GOMF_SNARE_BINDING	0.0476879	0.273678	0.248911	-0.416253	-1.3385	112
7077	GOBP_SEGMENTATION	0.0478261	0.274323	0.248911	-0.41344	-1.32813	117
1018	GOBP_CYTOKINE_PRODUCTION_INVOLVED_IN_IMMUNE_RESPONSE	0.048011	0.274738	0.24134	-0.399655	-1.32005	141
1266	GOBP_ECTOPIC_GERM_CELL_PROGRAMMED_CELL_DEATH	0.0480274	0.274738	0.271289	-0.64289	-1.49509	19
2485	GOBP_METANEPHRIC_NEPHRON_TUBULE_EPITHELIAL_CELL_DIFFERENTIATION	0.0479578	0.274738	0.321776	-0.817783	-1.49026	6
4738	GOBP_POSITIVE_REGULATION_OF_PROTEIN_AUTOPHOSPHORYLATION	0.0479339	0.274738	0.266351	-0.593075	-1.47585	25
10444	GOMF_TRANSMEMBRANE_RECEPTOR_PROTEIN_TYROSINE_KINASE_ACTIVITY	0.0479876	0.274738	0.257206	-0.467848	-1.37668	60
3219	GOBP_NEGATIVE_REGULATION_OF_MUSCLE_ADAPTATION	0.0481216	0.275128	0.321776	-0.720127	-1.54202	12
8200	GOCC_HIGH_DENSITY_LIPOPROTEIN_PARTICLE	0.0481881	0.275361	0.321776	0.539604	1.48458	27
7657	GOBP_VASCULAR_ENDOTHELIAL_GROWTH_FACTOR_RECEPTOR_SIGNALING_PATHWAY	0.0482195	0.275392	0.321776	-0.540422	-1.50388	45
6078	GOBP_REGULATION_OF_MEMBRANE_REPOLARIZATION	0.0482529	0.275435	0.266351	-0.543668	-1.44012	34
7208	GOBP_SODIUM_ION_TRANSMEMBRANE_TRANSPORT	0.0483425	0.275799	0.24134	-0.399418	-1.313	138
2679	GOBP_MRNA_TRANSPORT	0.0483931	0.275939	0.321776	0.36873	1.30404	100
2635	GOBP_MONOCYTE_CHEMOTAXIS	0.0485133	0.276368	0.257206	-0.472945	-1.37016	55
2977	GOBP_NEGATIVE_REGULATION_OF_EATING_BEHAVIOR	0.0485462	0.276368	0.321776	-0.817208	-1.48921	6
6081	GOBP_REGULATION_OF_MEMORY_T_CELL_DIFFERENTIATION	0.0485462	0.276368	0.321776	-0.817199	-1.4892	6
3708	GOBP_NUCLEOSIDE_PHOSPHATE_BIOSYNTHETIC_PROCESS	0.0486053	0.276556	0.321776	0.302056	1.18827	230
5277	GOBP_PSEUDOPODIUM_ORGANIZATION	0.0486653	0.27675	0.321776	-0.717711	-1.53685	12
3429	GOBP_NEGATIVE_REGULATION_OF_STRIATED_MUSCLE_CELL_DIFFERENTIATION	0.0487305	0.276972	0.321776	0.471801	1.41243	37
7967	GOCC_COLLAGEN_TRIMER	0.0488166	0.277314	0.248911	-0.441508	-1.35402	78
4615	GOBP_POSITIVE_REGULATION_OF_MULTICELLULAR_ORGANISM_GROWTH	0.0488599	0.277412	0.261664	-0.506215	-1.38827	41
1117	GOBP_DETECTION_OF_STIMULUS	0.048906	0.277526	0.231127	-0.374531	-1.28342	198
85	GOBP_ADHERENS_JUNCTION_MAINTENANCE	0.0491346	0.278182	0.321776	-0.815532	-1.48616	6
400	GOBP_BUNDLE_OF_HIS_CELL_TO_PURKINJE_MYOCYTE_COMMUNICATION	0.0490909	0.278182	0.276501	-0.687344	-1.50634	14
4149	GOBP_POSITIVE_REGULATION_OF_CARBOHYDRATE_METABOLIC_PROCESS	0.0491071	0.278182	0.248911	-0.439114	-1.34308	77
4405	GOBP_POSITIVE_REGULATION_OF_GRANULOCYTE_DIFFERENTIATION	0.0490909	0.278182	0.276501	-0.751415	-1.50123	9
5530	GOBP_REGULATION_OF_CALCIUM_ION_TRANSPORT_INTO_CYTOSOL	0.0491525	0.278182	0.266351	-0.624195	-1.47773	21
3564	GOBP_NEURONAL_ACTION_POTENTIAL	0.0492063	0.278339	0.257206	-0.472279	-1.36063	54
959	GOBP_CONNECTIVE_TISSUE_REPLACEMENT_INVOLVED_IN_INFLAMMATORY_RESPONSE_WOUND_HEALING	0.0495238	0.278604	0.282013	-0.783796	-1.46146	7
1379	GOBP_EOSINOPHIL_DIFFERENTIATION	0.0494071	0.278604	0.287857	-0.830025	-1.45062	5
1493	GOBP_EXPORT_ACROSS_PLASMA_MEMBRANE	0.0495356	0.278604	0.252961	-0.462534	-1.35911	59
1619	GOBP_GAMMA_AMINOBUTYRIC_ACID_METABOLIC_PROCESS	0.0495238	0.278604	0.282013	-0.784	-1.46184	7
4121	GOBP_POSITIVE_REGULATION_OF_BLOOD_BRAIN_BARRIER_PERMEABILITY	0.0494071	0.278604	0.287857	-0.830828	-1.45203	5
5413	GOBP_REGULATION_OF_ACTOMYOSIN_STRUCTURE_ORGANIZATION	0.0494186	0.278604	0.245042	-0.415889	-1.32975	107
5549	GOBP_REGULATION_OF_CARDIAC_MUSCLE_CONTRACTION	0.0493066	0.278604	0.252961	-0.455623	-1.36024	69
6511	GOBP_REGULATION_OF_SOMATOSTATIN_SECRETION	0.0495238	0.278604	0.282013	-0.783247	-1.46044	7
7170	GOBP_SMALL_INTESTINE_SMOOTH_MUSCLE_CONTRACTION	0.0494071	0.278604	0.287857	-0.831315	-1.45288	5
8018	GOCC_CYTOPLASMIC_STRESS_GRANULE	0.0495413	0.278604	0.321776	0.393296	1.32042	71
9302	GOMF_ESTROGEN_16_ALPHA_HYDROXYLASE_ACTIVITY	0.0494071	0.278604	0.287857	-0.830804	-1.45199	5
3615	GOBP_NEUTRAL_LIPID_METABOLIC_PROCESS	0.0497813	0.279806	0.321776	0.3415	1.26256	135
8337	GOCC_MICROVILLUS	0.0498534	0.280063	0.245042	-0.423185	-1.33976	100
4508	GOBP_POSITIVE_REGULATION_OF_LAMELLIPODIUM_ORGANIZATION	0.0499168	0.280272	0.261664	-0.543097	-1.43861	34
2043	GOBP_INTERLEUKIN_6_PRODUCTION	0.0499665	0.280403	0.321776	0.320151	1.21947	162
9776	GOMF_NADPLUS_PROTEIN_ADP_RIBOSYLTRANSFERASE_ACTIVITY	0.0501155	0.281091	0.321776	0.57644	1.47121	20
10040	GOMF_PHOSPHOPROTEIN_BINDING	0.0502903	0.281922	0.321776	-0.437472	-1.39967	108
4382	GOBP_POSITIVE_REGULATION_OF_GERMINAL_CENTER_FORMATION	0.0503212	0.281947	0.321776	0.886926	1.39424	3
7124	GOBP_SHORT_CHAIN_FATTY_ACID_CATABOLIC_PROCESS	0.0504032	0.28211	0.287857	0.82029	1.46832	5
8465	GOCC_PAM_COMPLEX_TIM23_ASSOCIATED_IMPORT_MOTOR	0.0504032	0.28211	0.287857	0.823986	1.47494	5
3452	GOBP_NEGATIVE_REGULATION_OF_TOLL_LIKE_RECEPTOR_SIGNALING_PATHWAY	0.0504952	0.282338	0.321776	0.507681	1.46904	33
5339	GOBP_PYRIMIDINE_NUCLEOSIDE_DIPHOSPHATE_BIOSYNTHETIC_PROCESS	0.0505237	0.282338	0.321776	0.799708	1.50871	6
10448	GOMF_TRANS_1_2_DIHYDROBENZENE_1_2_DIOL_DEHYDROGENASE_ACTIVITY	0.0505051	0.282338	0.287857	0.978591	1.28846	1
2416	GOBP_MEMBRANE_DEPOLARIZATION_DURING_ACTION_POTENTIAL	0.0506536	0.282916	0.257206	-0.550174	-1.44769	31
2782	GOBP_NEGATIVE_REGULATION_OF_ACTION_POTENTIAL	0.0507246	0.283164	0.271289	-0.729591	-1.50085	10
7093	GOBP_SENSORY_PERCEPTION_OF_PAIN	0.0508242	0.283571	0.234393	-0.399465	-1.31754	140
430	GOBP_CALCIUM_ION_REGULATED_EXOCYTOSIS	0.0510836	0.28483	0.248911	-0.452026	-1.34558	68
808	GOBP_CENTRIOLE_ASSEMBLY	0.0511569	0.28483	0.321776	0.483056	1.45814	39
2264	GOBP_LYMPHOCYTE_CHEMOTAXIS	0.0511182	0.28483	0.252961	-0.490973	-1.39163	48
9569	GOMF_ISOPRENOID_BINDING	0.0511551	0.28483	0.257206	-0.546166	-1.44143	32
6777	GOBP_RESPONSE_TO_CHEMOKINE	0.0513219	0.285599	0.248911	-0.462703	-1.36656	64
6783	GOBP_RESPONSE_TO_CORTICOSTEROID	0.051395	0.285856	0.24134	-0.438513	-1.35259	82
10511	GOMF_VASOPRESSIN_RECEPTOR_ACTIVITY	0.0514286	0.285893	0.276501	-0.782246	-1.45857	7
1439	GOBP_ESTABLISHMENT_OF_ENDOTHELIAL_BARRIER	0.0515079	0.286056	0.321776	-0.504619	-1.43067	49
4662	GOBP_POSITIVE_REGULATION_OF_NIK_NF_KAPPAB_SIGNALING	0.0515116	0.286056	0.321776	0.419555	1.4021	64
6786	GOBP_RESPONSE_TO_DECREASED_OXYGEN_LEVELS	0.0515464	0.2861	0.224966	-0.372269	-1.27629	206
1352	GOBP_ENDOTHELIAL_CELL_APOPTOTIC_PROCESS	0.0518868	0.287539	0.248911	-0.469681	-1.35773	56
1816	GOBP_HEME_BIOSYNTHETIC_PROCESS	0.0518639	0.287539	0.252961	-0.576466	-1.45559	26
9618	GOMF_LIPID_TRANSPORTER_ACTIVITY	0.0518417	0.287539	0.231127	-0.396861	-1.31396	142
5349	GOBP_PYRIMIDINE_NUCLEOTIDE_METABOLIC_PROCESS	0.0519379	0.287673	0.321776	0.480973	1.45185	39
2415	GOBP_MEMBRANE_DEPOLARIZATION	0.0520059	0.28775	0.24134	-0.427665	-1.33033	92
6632	GOBP_REGULATION_OF_TUBE_SIZE	0.052	0.28775	0.227987	-0.379126	-1.27646	164
3131	GOBP_NEGATIVE_REGULATION_OF_LENS_FIBER_CELL_DIFFERENTIATION	0.0520768	0.287992	0.321776	-0.812274	-1.48022	6
3883	GOBP_PEPTIDE_TRANSPORT	0.0521212	0.288088	0.216543	-0.34973	-1.24286	290
2791	GOBP_NEGATIVE_REGULATION_OF_ADENYLATE_CYCLASE_ACTIVITY	0.052222	0.288496	0.321776	0.639861	1.50552	14
869	GOBP_CHONDROCYTE_DEVELOPMENT	0.0522876	0.288708	0.252961	-0.547282	-1.44007	31
914	GOBP_CITRULLINE_METABOLIC_PROCESS	0.0526316	0.288748	0.271289	-0.765499	-1.47528	8
1081	GOBP_DEOXYGUANOSINE_METABOLIC_PROCESS	0.0527383	0.288748	0.282013	0.839788	1.40804	4
1194	GOBP_DNA_ENDOREDUPLICATION	0.0527383	0.288748	0.282013	0.841827	1.41146	4
1850	GOBP_HIPPO_SIGNALING	0.0528053	0.288748	0.252961	-0.530133	-1.41179	35
1923	GOBP_HYALURONAN_CATABOLIC_PROCESS	0.0524476	0.288748	0.261664	-0.675681	-1.50159	15
1959	GOBP_IMMUNOLOGICAL_MEMORY_FORMATION_PROCESS	0.0526316	0.288748	0.271289	-0.764876	-1.47409	8
2633	GOBP_MONOCYTE_AGGREGATION	0.0526316	0.288748	0.271289	-0.769835	-1.48364	8
3018	GOBP_NEGATIVE_REGULATION_OF_FIBRINOLYSIS	0.0527273	0.288748	0.266351	-0.750348	-1.4991	9
3256	GOBP_NEGATIVE_REGULATION_OF_NITRIC_OXIDE_METABOLIC_PROCESS	0.0524535	0.288748	0.257206	-0.627915	-1.46403	20
3312	GOBP_NEGATIVE_REGULATION_OF_POTASSIUM_ION_TRANSMEMBRANE_TRANSPORT	0.0528053	0.288748	0.252961	-0.561777	-1.45003	29
4560	GOBP_POSITIVE_REGULATION_OF_MAST_CELL_PROLIFERATION	0.0526652	0.288748	0.321776	-0.811364	-1.47857	6
5330	GOBP_PYRIMIDINE_DEOXYRIBONUCLEOSIDE_TRIPHOSPHATE_METABOLIC_PROCESS	0.0524194	0.288748	0.282013	0.812388	1.45418	5
5553	GOBP_REGULATION_OF_CARDIOBLAST_DIFFERENTIATION	0.0526316	0.288748	0.271289	-0.765625	-1.47553	8
6678	GOBP_REGULATION_OF_VERY_LOW_DENSITY_LIPOPROTEIN_PARTICLE_CLEARANCE	0.0527383	0.288748	0.282013	0.841461	1.41084	4
7730	GOBP_VITAMIN_D3_METABOLIC_PROCESS	0.0528376	0.288748	0.276501	-0.798977	-1.45599	6
8009	GOCC_CYTOLYTIC_GRANULE	0.0526316	0.288748	0.271289	-0.767348	-1.47885	8
8394	GOCC_NEURONAL_DENSE_CORE_VESICLE_MEMBRANE	0.0528376	0.288748	0.276501	-0.798865	-1.45579	6
8589	GOCC_P_BODY	0.0527767	0.288748	0.321776	0.379649	1.27758	75
10024	GOMF_PHOSPHATIDYLSERINE_1_ACYLHYDROLASE_ACTIVITY	0.0524194	0.288748	0.282013	0.810872	1.45146	5
10247	GOMF_SCAFFOLD_PROTEIN_BINDING	0.0527086	0.288748	0.237794	-0.438027	-1.35089	81
7130	GOBP_SIGNALING_RECEPTOR_LIGAND_PRECURSOR_PROCESSING	0.0528926	0.288752	0.252961	-0.576482	-1.43456	25
10121	GOMF_PROTEIN_HOMODIMERIZATION_ACTIVITY	0.052889	0.288752	0.321776	0.261169	1.11873	649
775	GOBP_CELL_MOTILITY_INVOLVED_IN_CEREBRAL_CORTEX_RADIAL_GLIA_GUIDED_MIGRATION	0.0529532	0.288786	0.282013	0.795723	1.5012	6
4473	GOBP_POSITIVE_REGULATION_OF_INTERLEUKIN_18_PRODUCTION	0.0529532	0.288786	0.282013	0.791424	1.49309	6
4038	GOBP_POLYADENYLATION_DEPENDENT_RNA_CATABOLIC_PROCESS	0.0531915	0.289937	0.287857	0.742787	1.49173	8
5843	GOBP_REGULATION_OF_GLIOGENESIS	0.0532959	0.290358	0.231127	-0.405136	-1.31847	129
3130	GOBP_NEGATIVE_REGULATION_OF_LAMELLIPODIUM_ORGANIZATION	0.0533333	0.290413	0.271289	-0.780956	-1.45617	7
5256	GOBP_PROTEIN_TRANSMEMBRANE_IMPORT_INTO_INTRACELLULAR_ORGANELLE	0.0535325	0.291348	0.321776	0.50267	1.45454	33
289	GOBP_AUTONOMIC_NERVOUS_SYSTEM_DEVELOPMENT	0.0535714	0.291411	0.248911	-0.490219	-1.38985	49
2610	GOBP_MODIFICATION_OF_POSTSYNAPTIC_ACTIN_CYTOSKELETON	0.053913	0.292496	0.257206	-0.664433	-1.48776	16
4244	GOBP_POSITIVE_REGULATION_OF_COAGULATION	0.0539216	0.292496	0.248911	-0.566154	-1.43889	27
5458	GOBP_REGULATION_OF_APOPTOTIC_SIGNALING_PATHWAY	0.0538642	0.292496	0.208955	-0.337094	-1.21977	369
6200	GOBP_REGULATION_OF_NEUROTRANSMITTER_RECEPTOR_LOCALIZATION_TO_POSTSYNAPTIC_SPECIALIZATION_MEMBRANE	0.053913	0.292496	0.257206	-0.664766	-1.4885	16
7589	GOBP_T_CELL_RECEPTOR_SIGNALING_PATHWAY	0.0539359	0.292496	0.234393	-0.41416	-1.32494	109
8569	GOCC_PROTEIN_LIPID_COMPLEX	0.0538613	0.292496	0.321776	0.475345	1.42538	38
3994	GOBP_PIGMENT_BIOSYNTHETIC_PROCESS	0.0540127	0.292764	0.321776	-0.514348	-1.46594	50
3707	GOBP_NUCLEOSIDE_MONOPHOSPHATE_METABOLIC_PROCESS	0.0540908	0.293038	0.321776	0.402538	1.3291	61
4534	GOBP_POSITIVE_REGULATION_OF_LYMPHOCYTE_ACTIVATION	0.0542169	0.293273	0.2114	-0.347435	-1.23865	302
5621	GOBP_REGULATION_OF_CELL_KILLING	0.0541683	0.293273	0.321776	-0.430031	-1.35998	102
9664	GOMF_MAGNESIUM_ION_TRANSMEMBRANE_TRANSPORTER_ACTIVITY	0.0541958	0.293273	0.257206	-0.670021	-1.48901	15
844	GOBP_CHAPERONE_MEDIATED_AUTOPHAGY	0.0542495	0.2933	0.261664	-0.693734	-1.48551	12
1779	GOBP_G_PROTEIN_COUPLED_OPIOID_RECEPTOR_SIGNALING_PATHWAY	0.0545113	0.294566	0.266351	-0.763294	-1.47104	8
885	GOBP_CHROMATIN_REMODELING_AT_CENTROMERE	0.0549898	0.296549	0.276501	0.785124	1.4812	6
2755	GOBP_NAD_METABOLIC_PROCESS	0.0549898	0.296549	0.276501	0.788881	1.48829	6
3314	GOBP_NEGATIVE_REGULATION_OF_POTASSIUM_ION_TRANSPORT	0.0549273	0.296549	0.245042	-0.507778	-1.38694	40
6986	GOBP_RHYTHMIC_SYNAPTIC_TRANSMISSION	0.0549898	0.296549	0.276501	0.787534	1.48575	6
8032	GOCC_DENDRITIC_GROWTH_CONE	0.0551902	0.297479	0.321776	-0.707832	-1.5157	12
7532	GOBP_TRNA_MODIFICATION	0.0553242	0.297662	0.321776	0.394084	1.32507	68
8583	GOCC_PROXIMAL_NEURON_PROJECTION	0.055336	0.297662	0.271289	-0.822316	-1.43715	5
8872	GOMF_ACTIVIN_RECEPTOR_ACTIVITY_TYPE_I	0.055336	0.297662	0.271289	-0.822081	-1.43674	5
9032	GOMF_CALCIUM_AND_CALMODULIN_RESPONSIVE_ADENYLATE_CYCLASE_ACTIVITY	0.055336	0.297662	0.271289	-0.821762	-1.43618	5
5725	GOBP_REGULATION_OF_DNA_HELICASE_ACTIVITY	0.0554415	0.297928	0.276501	0.880686	1.38443	3
5993	GOBP_REGULATION_OF_LACTATION	0.0554415	0.297928	0.276501	0.8843	1.39011	3
6212	GOBP_REGULATION_OF_NIK_NF_KAPPAB_SIGNALING	0.055563	0.29828	0.321776	0.371872	1.29644	90
10032	GOMF_PHOSPHOLIPASE_BINDING	0.0555556	0.29828	0.245042	-0.563151	-1.43126	27
9613	GOMF_LIPASE_INHIBITOR_ACTIVITY	0.0556793	0.298753	0.287857	0.655232	1.47409	12
1569	GOBP_FLUID_TRANSPORT	0.0558292	0.299407	0.245042	-0.554854	-1.44705	30
4518	GOBP_POSITIVE_REGULATION_OF_LIPASE_ACTIVITY	0.0559006	0.299639	0.237794	-0.470411	-1.36929	57
4272	GOBP_POSITIVE_REGULATION_OF_DENDRITE_DEVELOPMENT	0.0559322	0.299657	0.248911	-0.617007	-1.46071	21
2939	GOBP_NEGATIVE_REGULATION_OF_CYSTEINE_TYPE_ENDOPEPTIDASE_ACTIVITY	0.0559647	0.29968	0.231127	-0.433481	-1.33283	79
3295	GOBP_NEGATIVE_REGULATION_OF_PEPTIDYL_TYROSINE_PHOSPHORYLATION	0.0560417	0.299895	0.321776	0.429746	1.38035	52
4049	GOBP_POLYSACCHARIDE_BIOSYNTHETIC_PROCESS	0.0561457	0.299895	0.234393	-0.44507	-1.3402	72
6148	GOBP_REGULATION_OF_MRNA_PROCESSING	0.0561228	0.299895	0.321776	0.334641	1.23526	133
7135	GOBP_SIGNAL_TRANSDUCTION_IN_ABSENCE_OF_LIGAND	0.0561457	0.299895	0.234393	-0.443099	-1.33426	72
10036	GOMF_PHOSPHOLIPID_BINDING	0.0561283	0.299895	0.202072	-0.33111	-1.21197	424
7023	GOBP_RNA_METHYLATION	0.0562773	0.300447	0.321776	0.427128	1.38334	56
2626	GOBP_MONOACYLGLYCEROL_METABOLIC_PROCESS	0.0563798	0.300623	0.321776	0.644768	1.48548	13
7259	GOBP_SPINDLE_ASSEMBLY_INVOLVED_IN_FEMALE_MEIOSIS	0.0564516	0.300623	0.271289	0.808905	1.44794	5
7260	GOBP_SPINDLE_ASSEMBLY_INVOLVED_IN_FEMALE_MEIOSIS_I	0.0564516	0.300623	0.271289	0.808905	1.44794	5
9534	GOMF_INSULIN_LIKE_GROWTH_FACTOR_II_BINDING	0.056391	0.300623	0.261664	-0.762154	-1.46884	8
9601	GOMF_LIGAND_GATED_SODIUM_CHANNEL_ACTIVITY	0.0564516	0.300623	0.271289	0.809406	1.44884	5
20	GOBP_ACROSOMAL_VESICLE_EXOCYTOSIS	0.0567515	0.300797	0.266351	-0.795728	-1.45007	6
[truncated: 8,641 more rows]
