# Supplementary material for: TGFβ Inhibitor A83-01 Enhances Murine HSPC Expansion for Gene Therapy
Source: Cells. 2023 Jul 31;12(15):1978. doi: 10.3390/cells12151978 (PMC10416825; doi:10.3390/cells12151978)
Supplement: Supplementary file 1 [file cells-12-01978-s001.zip › Supplementary Table S4_GOBP_M5_filtered.xlsx]

## Sheet: Sheet1
	pathway	pval	padj	log2err	ES	NES	size	color	name	short_name
247	GOBP_PLATELET_ACTIVATION	2.32287e-08	6.67982e-06	0.733762	-0.674991	-2.09663	94	#4dc0b5	Thrombocytic	PLT activation
210	GOBP_MYELOID_CELL_DEVELOPMENT	2.54305e-05	0.00162024	0.57561	-0.606617	-1.87886	88	#f66d9b	Hematopoietic	Myeloid cell development
239	GOBP_MEGAKARYOCYTE_DEVELOPMENT	3.20346e-05	0.00191954	0.557332	-0.79846	-1.97813	24	#4dc0b5	Thrombocytic	MK development
240	GOBP_MEGAKARYOCYTE_DIFFERENTIATION	3.6047e-05	0.00205206	0.557332	-0.710821	-1.97816	44	#4dc0b5	Thrombocytic	MK differentiation
260	GOBP_REGULATION_OF_PLATELET_ACTIVATION	3.92746e-05	0.00219938	0.557332	-0.684236	-1.94651	48	#4dc0b5	Thrombocytic	Regulation of PLT activation
248	GOBP_PLATELET_AGGREGATION	9.04416e-05	0.00409489	0.538434	-0.661833	-1.9206	54	#4dc0b5	Thrombocytic	PLT aggregation
70	GOBP_GRANULOCYTE_ACTIVATION	0.000111319	0.00475674	0.538434	0.642157	1.9291	41	#f6993f	Granulocytic	GRAN activation
129	GOBP_MAST_CELL_ACTIVATION	0.000188846	0.00709742	0.518848	-0.587353	-1.79456	77	#e3342f	Mast cell	MC activation
266	GOCC_PLATELET_ALPHA_GRANULE	0.000649953	0.0179623	0.477271	-0.767456	-1.84977	20	#4dc0b5	Thrombocytic	PLT alpha granule
235	GOBP_REGULATION_OF_MYELOID_LEUKOCYTE_DIFFERENTIATION	0.000949956	0.0238385	0.477271	-0.493908	-1.60231	129	#f66d9b	Hematopoietic	Regulation of myeloid LEUKO differentiation
39	GOBP_TRANSFORMING_GROWTH_FACTOR_BETA_ACTIVATION	0.000971852	0.0242735	0.477271	-0.868462	-1.71053	9	#3490dc	TGFb signaling	TGFβ activation
88	GOBP_NEUTROPHIL_MEDIATED_IMMUNITY	0.00110638	0.0266331	0.45506	0.605871	1.77939	38	#f6993f	Granulocytic	Neutrophil mediated immunity
3	GOBP_EPITHELIAL_TO_MESENCHYMAL_TRANSITION	0.00137895	0.0311509	0.45506	-0.475165	-1.5732	149	#3490dc	TGFb signaling	Epithelial to mesenchymal transition
5	GOBP_MAPK_CASCADE	0.00165265	0.0358862	0.45506	-0.352933	-1.31673	756	#3490dc	TGFb signaling	MAPK cascade
185	GOBP_POSITIVE_REGULATION_OF_MACROPHAGE_DIFFERENTIATION	0.00165616	0.035889	0.45506	-0.779564	-1.77823	16	#9561e2	Monocytic	Positive regulation of MΦ differentiation
21	GOBP_POSITIVE_REGULATION_OF_MAPK_CASCADE	0.00170076	0.036484	0.45506	-0.381742	-1.39255	494	#3490dc	TGFb signaling	Positive regulation of MAPK cascade
197	GOBP_REGULATION_OF_MACROPHAGE_DIFFERENTIATION	0.00172751	0.0367613	0.45506	-0.750019	-1.83309	22	#9561e2	Monocytic	Regulation of MΦ differentiation
63	GOBP_ERYTHROCYTE_DEVELOPMENT	0.00198057	0.039686	0.431708	-0.637503	-1.76209	43	#ffed4a	Erythroid	ERY development
211	GOBP_MYELOID_CELL_DIFFERENTIATION	0.00211959	0.0416096	0.431708	-0.378592	-1.36246	404	#f66d9b	Hematopoietic	Myeloid cell differentiation
130	GOBP_MAST_CELL_ACTIVATION_INVOLVED_IN_IMMUNE_RESPONSE	0.00238275	0.045031	0.431708	-0.590267	-1.71414	57	#e3342f	Mast cell	MC activation in immune response
33	GOBP_REGULATION_OF_TRANSFORMING_GROWTH_FACTOR_BETA_ACTIVATION	0.00252062	0.0468053	0.431708	-0.865919	-1.67209	8	#3490dc	TGFb signaling	Regulation of TGFβ activation
261	GOBP_REGULATION_OF_PLATELET_AGGREGATION	0.00287627	0.050752	0.431708	-0.680622	-1.73962	29	#4dc0b5	Thrombocytic	Regulation of PLT aggregation
97	GOBP_POSITIVE_REGULATION_OF_NEUTROPHIL_DEGRANULATION	0.0033664	0.0567166	0.431708	0.905299	1.59466	5	#f6993f	Granulocytic
242	GOBP_NEGATIVE_REGULATION_OF_PLATELET_ACTIVATION	0.00339331	0.0569476	0.431708	-0.732262	-1.74544	19	#4dc0b5	Thrombocytic
101	GOBP_REGULATION_OF_NEUTROPHIL_ACTIVATION	0.0034702	0.058055	0.431708	0.773985	1.78489	13	#f6993f	Granulocytic
230	GOBP_POSITIVE_REGULATION_OF_MYELOID_LEUKOCYTE_DIFFERENTIATION	0.00426894	0.0657312	0.407018	-0.554666	-1.65489	66	#f66d9b	Hematopoietic
133	GOBP_MAST_CELL_DIFFERENTIATION	0.00480477	0.0706181	0.407018	-0.872279	-1.63596	7	#e3342f	Mast cell
256	GOBP_POSITIVE_REGULATION_OF_PLATELET_ACTIVATION	0.00492197	0.0719365	0.407018	-0.791979	-1.6811	12	#4dc0b5	Thrombocytic
104	GOBP_REGULATION_OF_NEUTROPHIL_DEGRANULATION	0.00558654	0.0777199	0.407018	0.768299	1.64079	10	#f6993f	Granulocytic
83	GOBP_NEUTROPHIL_DEGRANULATION	0.00561531	0.0777227	0.407018	0.72545	1.6904	14	#f6993f	Granulocytic
145	GOBP_REGULATION_OF_MAST_CELL_ACTIVATION	0.00590677	0.0804731	0.407018	-0.570238	-1.64597	51	#e3342f	Mast cell
231	GOBP_POSITIVE_REGULATION_OF_MYELOID_LEUKOCYTE_MEDIATED_IMMUNITY	0.00609727	0.0825381	0.407018	0.64953	1.6935	22	#f66d9b	Hematopoietic
96	GOBP_POSITIVE_REGULATION_OF_NEUTROPHIL_ACTIVATION	0.00739919	0.0934128	0.407018	0.865297	1.619	6	#f6993f	Granulocytic
149	GOCC_MAST_CELL_GRANULE	0.00738739	0.0934128	0.407018	-0.879035	-1.58858	6	#e3342f	Mast cell
140	GOBP_POSITIVE_REGULATION_OF_MAST_CELL_ACTIVATION	0.00751821	0.0945553	0.407018	-0.653812	-1.6711	29	#e3342f	Mast cell
243	GOBP_NEGATIVE_REGULATION_OF_PLATELET_AGGREGATION	0.00842307	0.102075	0.38073	-0.748079	-1.67211	14	#4dc0b5	Thrombocytic
233	GOBP_REGULATION_OF_MYELOID_CELL_DIFFERENTIATION	0.00885004	0.104977	0.38073	-0.408411	-1.39544	206	#f66d9b	Hematopoietic
228	GOBP_POSITIVE_REGULATION_OF_MYELOID_CELL_DIFFERENTIATION	0.00931782	0.107997	0.38073	-0.474716	-1.50536	104	#f66d9b	Hematopoietic
85	GOBP_NEUTROPHIL_EXTRAVASATION	0.00939074	0.108589	0.38073	0.707768	1.6492	14	#f6993f	Granulocytic
141	GOBP_POSITIVE_REGULATION_OF_MAST_CELL_ACTIVATION_INVOLVED_IN_IMMUNE_RESPONSE	0.0102475	0.113821	0.38073	-0.693032	-1.69381	22	#e3342f	Mast cell
254	GOBP_PLATELET_MORPHOGENESIS	0.012406	0.127285	0.38073	-0.680178	-1.63941	20	#4dc0b5	Thrombocytic
92	GOBP_NEUTROPHIL_MIGRATION	0.013989	0.135805	0.38073	0.38484	1.39737	123	#f6993f	Granulocytic
143	GOBP_POSITIVE_REGULATION_OF_MAST_CELL_CYTOKINE_PRODUCTION	0.0144286	0.138182	0.38073	-0.87016	-1.53159	5	#e3342f	Mast cell
132	GOBP_MAST_CELL_CYTOKINE_PRODUCTION	0.0164204	0.149328	0.352488	-0.785122	-1.54638	9	#e3342f	Mast cell
217	GOBP_MYELOID_LEUKOCYTE_ACTIVATION	0.0182334	0.159673	0.352488	-0.38807	-1.35108	236	#f66d9b	Hematopoietic
79	GOBP_NEUTROPHIL_ACTIVATION_INVOLVED_IN_IMMUNE_RESPONSE	0.0192758	0.164076	0.352488	0.625303	1.59091	20	#f6993f	Granulocytic
187	GOBP_POSITIVE_REGULATION_OF_MACROPHAGE_MIGRATION	0.020401	0.168531	0.352488	-0.593983	-1.52948	30	#9561e2	Monocytic
75	GOBP_GRANULOCYTE_MIGRATION	0.0209831	0.171606	0.352488	0.352581	1.28854	153	#f6993f	Granulocytic
136	GOBP_MAST_CELL_PROLIFERATION	0.0216761	0.174722	0.352488	-0.761606	-1.53956	10	#e3342f	Mast cell
249	GOBP_PLATELET_DEGRANULATION	0.0221588	0.176739	0.352488	-0.800882	-1.54651	8	#4dc0b5	Thrombocytic
68	GOBP_PRIMITIVE_ERYTHROCYTE_DIFFERENTIATION	0.0250762	0.190579	0.352488	-0.809469	-1.51816	7	#ffed4a	Erythroid
161	GOBP_MACROPHAGE_INFLAMMATORY_PROTEIN_1_ALPHA_PRODUCTION	0.025408	0.19214	0.352488	0.794245	1.54818	7	#9561e2	Monocytic
219	GOBP_MYELOID_LEUKOCYTE_DIFFERENTIATION	0.0273531	0.201973	0.352488	-0.383774	-1.3257	225	#f66d9b	Hematopoietic
156	GOBP_MACROPHAGE_COLONY_STIMULATING_FACTOR_PRODUCTION	0.0275961	0.202498	0.352488	-0.841854	-1.48177	5	#9561e2	Monocytic
91	GOBP_NEUTROPHIL_MEDIATED_KILLING_OF_GRAM_NEGATIVE_BACTERIUM	0.0285642	0.207315	0.352488	0.790536	1.54095	7	#f6993f	Granulocytic
34	GOBP_RESPONSE_TO_TRANSFORMING_GROWTH_FACTOR_BETA	0.0360248	0.236462	0.266351	-0.369083	-1.28422	232	#3490dc	TGFb signaling
198	GOBP_REGULATION_OF_MACROPHAGE_FUSION	0.0363234	0.237688	0.321776	0.865215	1.45484	4	#9561e2	Monocytic
36	GOBP_SMAD_PROTEIN_SIGNAL_TRANSDUCTION	0.0366569	0.239135	0.287857	-0.456413	-1.40803	85	#3490dc	TGFb signaling
221	GOBP_MYELOID_LEUKOCYTE_MIGRATION	0.0374022	0.242658	0.321776	0.312723	1.22113	226	#f66d9b	Hematopoietic
81	GOBP_NEUTROPHIL_CHEMOTAXIS	0.0394076	0.250665	0.321776	0.37374	1.31217	97	#f6993f	Granulocytic
144	GOBP_POSITIVE_REGULATION_OF_MAST_CELL_PROLIFERATION	0.0400735	0.253057	0.321776	-0.811364	-1.46629	6	#e3342f	Mast cell
64	GOBP_ERYTHROCYTE_HOMEOSTASIS	0.0413885	0.258819	0.257206	-0.402852	-1.33096	146	#ffed4a	Erythroid
7	GOBP_NEGATIVE_REGULATION_OF_MAPK_CASCADE	0.0430248	0.265228	0.248911	-0.388267	-1.30496	173	#3490dc	TGFb signaling
165	GOBP_MONOCYTE_AGGREGATION	0.0451039	0.273883	0.321776	-0.769835	-1.48655	8	#9561e2	Monocytic
94	GOBP_POSITIVE_REGULATION_OF_GRANULOCYTE_DIFFERENTIATION	0.0469043	0.2799	0.287857	-0.751415	-1.47999	9	#f6993f	Granulocytic
40	GOBP_TRANSFORMING_GROWTH_FACTOR_BETA_PRODUCTION	0.0473934	0.28116	0.261664	-0.521416	-1.41496	38	#3490dc	TGFb signaling
100	GOBP_REGULATION_OF_GRANULOCYTE_DIFFERENTIATION	0.05026	0.291903	0.266351	-0.644303	-1.51511	18	#f6993f	Granulocytic
160	GOBP_MACROPHAGE_FUSION	0.0528541	0.300571	0.287857	0.806378	1.50876	6	#9561e2	Monocytic
48	GOMF_ACTIVIN_RECEPTOR_ACTIVITY_TYPE_I	0.0580524	0.316124	0.257206	-0.822081	-1.44697	5	#3490dc	TGFb signaling
167	GOBP_MONOCYTE_CHEMOTAXIS	0.0589147	0.318199	0.231127	-0.472945	-1.37583	55	#9561e2	Monocytic
193	GOBP_REGULATION_OF_MACROPHAGE_ACTIVATION	0.0684292	0.340387	0.213928	-0.460981	-1.33416	53	#9561e2	Monocytic
72	GOBP_GRANULOCYTE_DIFFERENTIATION	0.0715421	0.34681	0.2114	-0.498892	-1.36332	40	#f6993f	Granulocytic
253	GOBP_PLATELET_DERIVED_GROWTH_FACTOR_RECEPTOR_SIGNALING_PATHWAY	0.0714286	0.34681	0.206588	-0.450295	-1.33332	62	#4dc0b5	Thrombocytic
265	GOBP_RESPONSE_TO_PLATELET_DERIVED_GROWTH_FACTOR	0.0717949	0.34681	0.21925	-0.589968	-1.42977	21	#4dc0b5	Thrombocytic
153	GOBP_MACROPHAGE_ACTIVATION_INVOLVED_IN_IMMUNE_RESPONSE	0.0780142	0.360744	0.248911	0.555273	1.41274	20	#9561e2	Monocytic
89	GOBP_NEUTROPHIL_MEDIATED_KILLING_OF_BACTERIUM	0.0818966	0.366851	0.231127	0.651428	1.46752	12	#f6993f	Granulocytic
87	GOBP_NEUTROPHIL_MEDIATED_CYTOTOXICITY	0.0823799	0.367197	0.237794	0.587507	1.45304	17	#f6993f	Granulocytic
113	GOBP_HEMATOPOIETIC_STEM_CELL_HOMEOSTASIS	0.0831947	0.368996	0.199915	-0.558192	-1.38946	25	#38c172	Hematopoietic
51	GOMF_I_SMAD_BINDING	0.0842105	0.371939	0.204295	-0.664552	-1.48541	14	#3490dc	TGFb signaling
102	GOBP_REGULATION_OF_NEUTROPHIL_APOPTOTIC_PROCESS	0.0852878	0.37386	0.224966	0.683826	1.41431	9	#f6993f	Granulocytic
131	GOBP_MAST_CELL_CHEMOTAXIS	0.0894161	0.38239	0.202072	-0.665487	-1.45148	13	#e3342f	Mast cell
56	GOMF_TRANSFORMING_GROWTH_FACTOR_BETA_RECEPTOR_ACTIVITY_TYPE_I	0.0917603	0.385767	0.202072	-0.788621	-1.38808	5	#3490dc	TGFb signaling
26	GOBP_POSITIVE_REGULATION_OF_TRANSFORMING_GROWTH_FACTOR_BETA_PRODUCTION	0.0918544	0.385948	0.193813	-0.604229	-1.42087	18	#3490dc	TGFb signaling
62	GOBP_ENUCLEATE_ERYTHROCYTE_DIFFERENTIATION	0.094697	0.391547	0.199915	-0.695785	-1.40651	10	#ffed4a	Erythroid
225	GOBP_NEGATIVE_REGULATION_OF_MYELOID_LEUKOCYTE_DIFFERENTIATION	0.0945736	0.391547	0.179782	-0.45435	-1.31253	52	#f66d9b	Hematopoietic
65	GOBP_ERYTHROCYTE_MATURATION	0.0970537	0.397633	0.188204	-0.594364	-1.39767	18	#ffed4a	Erythroid
41	GOBP_TRANSFORMING_GROWTH_FACTOR_BETA_RECEPTOR_SIGNALING_PATHWAY	0.0996068	0.401294	0.159647	-0.360475	-1.21986	191	#3490dc	TGFb signaling
146	GOBP_REGULATION_OF_MAST_CELL_ACTIVATION_INVOLVED_IN_IMMUNE_RESPONSE	0.100318	0.402878	0.176694	-0.486243	-1.31394	37	#e3342f	Mast cell
80	GOBP_NEUTROPHIL_APOPTOTIC_PROCESS	0.101293	0.404038	0.206588	0.627297	1.41316	12	#f6993f	Granulocytic
134	GOBP_MAST_CELL_HOMEOSTASIS	0.102273	0.406002	0.191892	-0.727699	-1.3648	7	#e3342f	Mast cell
208	GOBP_MYELOID_CELL_ACTIVATION_INVOLVED_IN_IMMUNE_RESPONSE	0.103499	0.409377	0.165657	-0.395361	-1.24287	101	#f66d9b	Hematopoietic
170	GOBP_NEGATIVE_REGULATION_OF_MACROPHAGE_ACTIVATION	0.105263	0.412523	0.181383	-0.634096	-1.41733	14	#9561e2	Monocytic
53	GOMF_SMAD_BINDING	0.108504	0.42036	0.161979	-0.410225	-1.26582	84	#3490dc	TGFb signaling
182	GOBP_POSITIVE_REGULATION_OF_MACROPHAGE_CHEMOTAXIS	0.110357	0.423744	0.173748	-0.546214	-1.35321	24	#9561e2	Monocytic
74	GOBP_GRANULOCYTE_MACROPHAGE_COLONY_STIMULATING_FACTOR_SIGNALING_PATHWAY	0.110487	0.423785	0.183024	-0.78107	-1.37479	5	#f6993f	Granulocytic
110	GOCC_GRANULOCYTE_MACROPHAGE_COLONY_STIMULATING_FACTOR_RECEPTOR_COMPLEX	0.110487	0.423785	0.183024	-0.78107	-1.37479	5	#f6993f	Granulocytic
151	GOBP_GRANULOCYTE_MACROPHAGE_COLONY_STIMULATING_FACTOR_SIGNALING_PATHWAY	0.110487	0.423785	0.183024	-0.78107	-1.37479	5	#9561e2	Monocytic
206	GOCC_GRANULOCYTE_MACROPHAGE_COLONY_STIMULATING_FACTOR_RECEPTOR_COMPLEX	0.110487	0.423785	0.183024	-0.78107	-1.37479	5	#9561e2	Monocytic
251	GOBP_PLATELET_DERIVED_GROWTH_FACTOR_RECEPTOR_ALPHA_SIGNALING_PATHWAY	0.113636	0.42906	0.181383	-0.724782	-1.35933	7	#4dc0b5	Thrombocytic
199	GOBP_REGULATION_OF_MACROPHAGE_MIGRATION	0.119122	0.438076	0.159647	-0.451185	-1.28098	47	#9561e2	Monocytic
135	GOBP_MAST_CELL_MIGRATION	0.120419	0.439116	0.168238	-0.601987	-1.37316	16	#e3342f	Mast cell
244	GOBP_NEGATIVE_REGULATION_OF_PLATELET_DERIVED_GROWTH_FACTOR_RECEPTOR_SIGNALING_PATHWAY	0.121053	0.440794	0.168238	-0.617055	-1.37924	14	#4dc0b5	Thrombocytic
258	GOBP_POSITIVE_REGULATION_OF_PLATELET_DERIVED_GROWTH_FACTOR_RECEPTOR_SIGNALING_PATHWAY	0.121795	0.441197	0.186433	0.770469	1.35716	5	#4dc0b5	Thrombocytic
71	GOBP_GRANULOCYTE_CHEMOTAXIS	0.124138	0.443826	0.237794	0.321	1.16557	123	#f6993f	Granulocytic
212	GOBP_MYELOID_CELL_HOMEOSTASIS	0.124183	0.443838	0.141225	-0.351456	-1.18873	188	#f66d9b	Hematopoietic
224	GOBP_NEGATIVE_REGULATION_OF_MYELOID_CELL_DIFFERENTIATION	0.124633	0.444768	0.15017	-0.40579	-1.25213	84	#f66d9b	Hematopoietic
90	GOBP_NEUTROPHIL_MEDIATED_KILLING_OF_FUNGUS	0.128205	0.450347	0.181383	0.762188	1.34258	5	#f6993f	Granulocytic
139	GOBP_NEGATIVE_REGULATION_OF_MAST_CELL_DEGRANULATION	0.133192	0.458927	0.176694	0.740463	1.38543	6	#e3342f	Mast cell
220	GOBP_MYELOID_LEUKOCYTE_MEDIATED_IMMUNITY	0.137536	0.466937	0.140406	-0.377589	-1.20048	110	#f66d9b	Hematopoietic
23	GOBP_POSITIVE_REGULATION_OF_PATHWAY_RESTRICTED_SMAD_PROTEIN_PHOSPHORYLATION	0.14375	0.475	0.143759	-0.431612	-1.22959	49	#3490dc	TGFb signaling
214	GOBP_MYELOID_DENDRITIC_CELL_CHEMOTAXIS	0.144195	0.475731	0.158514	-0.762233	-1.34163	5	#f66d9b	Hematopoietic
203	GOBP_REGULATION_OF_MONOCYTE_EXTRAVASATION	0.145299	0.477893	0.169571	0.748978	1.31931	5	#9561e2	Monocytic
124	GOBP_LYMPHOCYTE_MIGRATION_INTO_LYMPHOID_ORGANS	0.14717	0.480039	0.157403	-0.684409	-1.3216	8	#6574cd	Lymphoid
42	GOBP_UBIQUITIN_DEPENDENT_SMAD_PROTEIN_CATABOLIC_PROCESS	0.147448	0.480652	0.157403	-0.73494	-1.32817	6	#3490dc	TGFb signaling
169	GOBP_MONOCYTE_EXTRAVASATION	0.148305	0.481265	0.166934	0.671438	1.3405	8	#9561e2	Monocytic
186	GOBP_POSITIVE_REGULATION_OF_MACROPHAGE_FUSION	0.151579	0.486957	0.164406	0.826889	1.29513	3	#9561e2	Monocytic
259	GOBP_REGULATION_OF_MEGAKARYOCYTE_DIFFERENTIATION	0.152513	0.488576	0.147331	-0.549645	-1.29251	18	#4dc0b5	Thrombocytic
20	GOBP_POSITIVE_REGULATION_OF_MAPKKK_CASCADE_BY_FIBROBLAST_GROWTH_FACTOR_RECEPTOR_SIGNALING_PATHWAY	0.1569	0.494788	0.152145	-0.732111	-1.32306	6	#3490dc	TGFb signaling
54	GOMF_TRANSFORMING_GROWTH_FACTOR_BETA_BINDING	0.160473	0.497497	0.141225	-0.530643	-1.29692	22	#3490dc	TGFb signaling
255	GOBP_POSITIVE_REGULATION_OF_MEGAKARYOCYTE_DIFFERENTIATION	0.165103	0.503929	0.147331	-0.666291	-1.31233	9	#4dc0b5	Thrombocytic
148	GOBP_REGULATION_OF_MAST_CELL_DIFFERENTIATION	0.166667	0.505079	0.146416	-0.748752	-1.3179	5	#e3342f	Mast cell
175	GOBP_NEGATIVE_REGULATION_OF_MACROPHAGE_DIFFERENTIATION	0.168242	0.507638	0.146416	-0.723044	-1.30668	6	#9561e2	Monocytic
263	GOBP_REGULATION_OF_PLATELET_DERIVED_GROWTH_FACTOR_RECEPTOR_BETA_SIGNALING_PATHWAY	0.169492	0.508821	0.155242	0.657196	1.31207	8	#4dc0b5	Thrombocytic
152	GOBP_MACROPHAGE_ACTIVATION	0.170803	0.509821	0.12564	-0.377257	-1.17631	97	#9561e2	Monocytic
218	GOBP_MYELOID_LEUKOCYTE_CYTOKINE_PRODUCTION	0.17284	0.512821	0.128789	-0.407714	-1.2092	65	#f66d9b	Hematopoietic
82	GOBP_NEUTROPHIL_CLEARANCE	0.173362	0.513235	0.153159	0.695449	1.30121	6	#f6993f	Granulocytic
119	GOBP_POSITIVE_REGULATION_OF_HEMATOPOIETIC_PROGENITOR_CELL_DIFFERENTIATION	0.173585	0.513611	0.143759	-0.669638	-1.29307	8	#38c172	Hematopoietic
262	GOBP_REGULATION_OF_PLATELET_DERIVED_GROWTH_FACTOR_RECEPTOR_ALPHA_SIGNALING_PATHWAY	0.187266	0.531482	0.137251	-0.728193	-1.28172	5	#4dc0b5	Thrombocytic
25	GOBP_POSITIVE_REGULATION_OF_TRANSFORMING_GROWTH_FACTOR_BETA1_PRODUCTION	0.190926	0.536384	0.13649	-0.706877	-1.27746	6	#3490dc	TGFb signaling
227	GOBP_POSITIVE_REGULATION_OF_MYELOID_CELL_APOPTOTIC_PROCESS	0.19697	0.542599	0.134273	-0.623145	-1.25967	10	#f66d9b	Hematopoietic
77	GOBP_NEGATIVE_REGULATION_OF_NEUTROPHIL_ACTIVATION	0.207265	0.554653	0.1396	0.715326	1.26003	5	#f6993f	Granulocytic
207	GOBP_COMMON_MYELOID_PROGENITOR_CELL_PROLIFERATION	0.21519	0.56492	0.135741	0.579331	1.23723	10	#f66d9b	Hematopoietic
174	GOBP_NEGATIVE_REGULATION_OF_MACROPHAGE_DERIVED_FOAM_CELL_DIFFERENTIATION	0.215909	0.565413	0.127505	-0.6078	-1.22865	10	#9561e2	Monocytic
163	GOBP_MACROPHAGE_PROLIFERATION	0.222222	0.573338	0.125033	-0.591416	-1.22373	11	#9561e2	Monocytic
4	GOBP_EPITHELIAL_TO_MESENCHYMAL_TRANSITION_INVOLVED_IN_ENDOCARDIAL_CUSHION_FORMATION	0.241796	0.594572	0.113313	-0.498542	-1.20162	20	#3490dc	TGFb signaling
162	GOBP_MACROPHAGE_MIGRATION	0.242331	0.594736	0.105521	-0.384256	-1.13702	63	#9561e2	Monocytic
159	GOBP_MACROPHAGE_DIFFERENTIATION	0.246032	0.598744	0.10673	-0.411227	-1.1479	45	#9561e2	Monocytic
125	GOBP_LYMPHOID_PROGENITOR_CELL_DIFFERENTIATION	0.249164	0.601319	0.10925	-0.480661	-1.19235	23	#6574cd	Lymphoid
164	GOBP_MONOCYTE_ACTIVATION	0.26454	0.61618	0.112843	-0.607018	-1.19559	9	#9561e2	Monocytic
17	GOBP_PATHWAY_RESTRICTED_SMAD_PROTEIN_PHOSPHORYLATION	0.271605	0.622818	0.0988903	-0.373645	-1.10815	65	#3490dc	TGFb signaling
49	GOMF_ACTIVIN_RECEPTOR_BINDING	0.272152	0.622883	0.118815	0.551086	1.17691	10	#3490dc	TGFb signaling
189	GOBP_POSITIVE_REGULATION_OF_MONOCYTE_CHEMOTACTIC_PROTEIN_1_PRODUCTION	0.273707	0.624036	0.119888	0.521474	1.17476	12	#9561e2	Monocytic
14	GOBP_NEGATIVE_REGULATION_OF_TRANSFORMING_GROWTH_FACTOR_BETA_RECEPTOR_SIGNALING_PATHWAY	0.278426	0.628828	0.0940503	-0.357314	-1.10403	86	#3490dc	TGFb signaling
43	GOCC_ACTIVIN_RECEPTOR_COMPLEX	0.291667	0.642512	0.10714	-0.626493	-1.17499	7	#3490dc	TGFb signaling
269	GOMF_PLATELET_DERIVED_GROWTH_FACTOR_RECEPTOR_BINDING	0.296491	0.6434	0.101351	-0.512196	-1.14486	14	#4dc0b5	Thrombocytic
183	GOBP_POSITIVE_REGULATION_OF_MACROPHAGE_CYTOKINE_PRODUCTION	0.30491	0.650058	0.125033	0.405529	1.11	28	#9561e2	Monocytic
222	GOBP_MYELOID_PROGENITOR_CELL_DIFFERENTIATION	0.307018	0.651899	0.0992333	-0.505512	-1.12992	14	#f66d9b	Hematopoietic
166	GOBP_MONOCYTE_CHEMOTACTIC_PROTEIN_1_PRODUCTION	0.307692	0.653071	0.11725	0.444675	1.11798	19	#9561e2	Monocytic
108	GOBP_REGULATION_OF_NEUTROPHIL_MIGRATION	0.308989	0.654127	0.130106	0.350178	1.09119	50	#f6993f	Granulocytic
264	GOBP_REGULATION_OF_PLATELET_DERIVED_GROWTH_FACTOR_RECEPTOR_SIGNALING_PATHWAY	0.312812	0.658172	0.0949752	-0.444772	-1.10713	25	#4dc0b5	Thrombocytic
181	GOBP_POSITIVE_REGULATION_OF_MACROPHAGE_ACTIVATION	0.314214	0.659793	0.120433	0.410287	1.11482	25	#9561e2	Monocytic
267	GOCC_PLATELET_DENSE_TUBULAR_NETWORK	0.315589	0.661259	0.102449	-0.701053	-1.16172	4	#4dc0b5	Thrombocytic
257	GOBP_POSITIVE_REGULATION_OF_PLATELET_AGGREGATION	0.317073	0.662649	0.101351	-0.582319	-1.14694	9	#4dc0b5	Thrombocytic
147	GOBP_REGULATION_OF_MAST_CELL_CHEMOTAXIS	0.324528	0.66724	0.100279	-0.586636	-1.1328	8	#e3342f	Mast cell
103	GOBP_REGULATION_OF_NEUTROPHIL_CHEMOTAXIS	0.334204	0.676289	0.119348	0.372321	1.07617	34	#f6993f	Granulocytic
196	GOBP_REGULATION_OF_MACROPHAGE_DERIVED_FOAM_CELL_DIFFERENTIATION	0.339527	0.681455	0.0911073	-0.449948	-1.0997	22	#9561e2	Monocytic
86	GOBP_NEUTROPHIL_HOMEOSTASIS	0.352941	0.694653	0.114267	0.394568	1.07237	27	#f6993f	Granulocytic
109	GOBP_RESPONSE_TO_GRANULOCYTE_MACROPHAGE_COLONY_STIMULATING_FACTOR	0.356473	0.698777	0.0943564	-0.560022	-1.10302	9	#f6993f	Granulocytic
204	GOBP_RESPONSE_TO_GRANULOCYTE_MACROPHAGE_COLONY_STIMULATING_FACTOR	0.356473	0.698777	0.0943564	-0.560022	-1.10302	9	#9561e2	Monocytic
142	GOBP_POSITIVE_REGULATION_OF_MAST_CELL_CHEMOTAXIS	0.357278	0.699346	0.0946646	-0.615579	-1.11247	6	#e3342f	Mast cell
236	GOBP_REGULATION_OF_MYELOID_LEUKOCYTE_MEDIATED_IMMUNITY	0.357362	0.699346	0.0828962	-0.358102	-1.06188	64	#f66d9b	Hematopoietic
201	GOBP_REGULATION_OF_MONOCYTE_CHEMOTAXIS	0.360065	0.700768	0.0860347	-0.426354	-1.0798	27	#9561e2	Monocytic
188	GOBP_POSITIVE_REGULATION_OF_MACROPHAGE_PROLIFERATION	0.365169	0.704003	0.0928481	-0.64119	-1.12858	5	#9561e2	Monocytic
73	GOBP_GRANULOCYTE_MACROPHAGE_COLONY_STIMULATING_FACTOR_PRODUCTION	0.366492	0.704767	0.0886261	-0.471045	-1.07448	16	#f6993f	Granulocytic
150	GOBP_GRANULOCYTE_MACROPHAGE_COLONY_STIMULATING_FACTOR_PRODUCTION	0.366492	0.704767	0.0886261	-0.471045	-1.07448	16	#9561e2	Monocytic
190	GOBP_POSITIVE_REGULATION_OF_MONOCYTE_CHEMOTAXIS	0.376511	0.713668	0.08654	-0.446744	-1.07677	20	#9561e2	Monocytic
47	GOMF_ACTIVIN_RECEPTOR_ACTIVITY	0.378987	0.714588	0.0908241	-0.549317	-1.08194	9	#3490dc	TGFb signaling
250	GOBP_PLATELET_DENSE_GRANULE_ORGANIZATION	0.379965	0.715546	0.0860347	-0.440432	-1.06156	20	#4dc0b5	Thrombocytic
46	GOCC_TRANSFORMING_GROWTH_FACTOR_BETA_LIGAND_RECEPTOR_COMPLEX	0.382022	0.718099	0.0902635	-0.635871	-1.11922	5	#3490dc	TGFb signaling
112	GOBP_HEMATOPOIETIC_STEM_CELL_DIFFERENTIATION	0.385113	0.720648	0.0817516	-0.400468	-1.051	32	#38c172	Hematopoietic
213	GOBP_MYELOID_DENDRITIC_CELL_ACTIVATION	0.387097	0.723215	0.0813027	-0.394705	-1.05273	35	#f66d9b	Hematopoietic
122	GOBP_REGULATION_OF_HEMATOPOIETIC_STEM_CELL_DIFFERENTIATION	0.391204	0.724779	0.101351	0.451989	1.0532	14	#38c172	Hematopoietic
158	GOBP_MACROPHAGE_CYTOKINE_PRODUCTION	0.396285	0.727969	0.077884	-0.356957	-1.02222	50	#9561e2	Monocytic
202	GOBP_REGULATION_OF_MONOCYTE_DIFFERENTIATION	0.39627	0.727969	0.100991	0.442598	1.06768	16	#9561e2	Monocytic
31	GOBP_REGULATION_OF_SMAD_PROTEIN_SIGNAL_TRANSDUCTION	0.398374	0.728674	0.0802023	-0.40912	-1.04757	28	#3490dc	TGFb signaling
176	GOBP_NEGATIVE_REGULATION_OF_MACROPHAGE_MIGRATION	0.403013	0.731863	0.0875697	-0.515642	-1.06695	11	#9561e2	Monocytic
95	GOBP_POSITIVE_REGULATION_OF_GRANULOCYTE_MACROPHAGE_COLONY_STIMULATING_FACTOR_PRODUCTION	0.410781	0.73817	0.0857844	-0.498622	-1.05841	12	#f6993f	Granulocytic
117	GOBP_NEGATIVE_REGULATION_OF_HEMATOPOIETIC_PROGENITOR_CELL_DIFFERENTIATION	0.410584	0.73817	0.0847985	-0.487146	-1.0625	13	#38c172	Hematopoietic
180	GOBP_POSITIVE_REGULATION_OF_GRANULOCYTE_MACROPHAGE_COLONY_STIMULATING_FACTOR_PRODUCTION	0.410781	0.73817	0.0857844	-0.498622	-1.05841	12	#9561e2	Monocytic
268	GOMF_PLATELET_DERIVED_GROWTH_FACTOR_BINDING	0.410781	0.73817	0.0857844	-0.498255	-1.05763	12	#4dc0b5	Thrombocytic
195	GOBP_REGULATION_OF_MACROPHAGE_CHEMOTAXIS	0.412621	0.739688	0.0780892	-0.393164	-1.03183	32	#9561e2	Monocytic
35	GOBP_SMAD_PROTEIN_COMPLEX_ASSEMBLY	0.425612	0.747773	0.0845557	-0.504729	-1.04436	11	#3490dc	TGFb signaling
138	GOBP_NEGATIVE_REGULATION_OF_MAST_CELL_ACTIVATION_INVOLVED_IN_IMMUNE_RESPONSE	0.428571	0.748227	0.0911073	0.506676	1.04792	9	#e3342f	Mast cell
179	GOBP_NEGATIVE_REGULATION_OF_MONOCYTE_DIFFERENTIATION	0.434599	0.751281	0.0897105	0.53972	1.05204	7	#9561e2	Monocytic
58	GOMF_TYPE_II_TRANSFORMING_GROWTH_FACTOR_BETA_RECEPTOR_BINDING	0.458422	0.768363	0.0873098	0.495354	1.0245	9	#3490dc	TGFb signaling
28	GOBP_REGULATION_OF_CELLULAR_RESPONSE_TO_TRANSFORMING_GROWTH_FACTOR_BETA_STIMULUS	0.469863	0.77714	0.0632191	-0.304447	-0.994064	132	#3490dc	TGFb signaling
173	GOBP_NEGATIVE_REGULATION_OF_MACROPHAGE_CYTOKINE_PRODUCTION	0.470175	0.777174	0.0755015	-0.443517	-0.991351	14	#9561e2	Monocytic
200	GOBP_REGULATION_OF_MACROPHAGE_PROLIFERATION	0.480151	0.782297	0.0782955	-0.576082	-1.04109	6	#9561e2	Monocytic
99	GOBP_REGULATION_OF_GRANULOCYTE_CHEMOTAXIS	0.485179	0.784266	0.0679923	-0.335609	-0.975808	56	#f6993f	Granulocytic
24	GOBP_POSITIVE_REGULATION_OF_SMAD_PROTEIN_SIGNAL_TRANSDUCTION	0.493805	0.790088	0.0734381	-0.422038	-0.970959	17	#3490dc	TGFb signaling
6	GOBP_NEGATIVE_REGULATION_OF_ACTIVIN_RECEPTOR_SIGNALING_PATHWAY	0.518587	0.806055	0.0734381	-0.449795	-0.954762	12	#3490dc	TGFb signaling
60	GOMF_TYPE_I_TRANSFORMING_GROWTH_FACTOR_BETA_RECEPTOR_BINDING	0.537175	0.816712	0.0716527	-0.443169	-0.940698	12	#3490dc	TGFb signaling
55	GOMF_TRANSFORMING_GROWTH_FACTOR_BETA_RECEPTOR_ACTIVITY	0.545455	0.82007	0.0718276	-0.467281	-0.944593	10	#3490dc	TGFb signaling
238	MP_INCREASED_MYELOID_SARCOMA_INCIDENCE	0.550562	0.823318	0.0707899	-0.542417	-0.954724	5	#f66d9b	Hematopoietic
234	GOBP_REGULATION_OF_MYELOID_DENDRITIC_CELL_ACTIVATION	0.557656	0.827247	0.0706196	-0.528612	-0.955301	6	#f66d9b	Hematopoietic
216	GOBP_MYELOID_DENDRITIC_CELL_DIFFERENTIATION	0.558528	0.827577	0.0645031	-0.378737	-0.939507	23	#f66d9b	Hematopoietic
19	GOBP_POSITIVE_REGULATION_OF_CELLULAR_RESPONSE_TO_TRANSFORMING_GROWTH_FACTOR_BETA_STIMULUS	0.560411	0.828048	0.08654	0.326797	0.920654	31	#3490dc	TGFb signaling
215	GOBP_MYELOID_DENDRITIC_CELL_CYTOKINE_PRODUCTION	0.564482	0.830653	0.0756946	0.502268	0.939758	6	#f66d9b	Hematopoietic
128	MP_INCREASED_HEMOLYMPHOID_SYSTEM_TUMOR_INCIDENCE	0.565126	0.830838	0.0753094	0.568767	0.956373	4	#6574cd	Lymphoid
229	GOBP_POSITIVE_REGULATION_OF_MYELOID_LEUKOCYTE_CYTOKINE_PRODUCTION_INVOLVED_IN_IMMUNE_RESPONSE	0.564873	0.830838	0.0613026	-0.340598	-0.927318	39	#f66d9b	Hematopoietic
8	GOBP_NEGATIVE_REGULATION_OF_P38MAPK_CASCADE	0.56962	0.832959	0.0751182	0.482421	0.940356	7	#3490dc	TGFb signaling
246	GOBP_PLATELET_ACTIVATING_FACTOR_METABOLIC_PROCESS	0.570076	0.832959	0.0696133	-0.507567	-0.951945	7	#4dc0b5	Thrombocytic
27	GOBP_REGULATION_OF_ACTIVIN_RECEPTOR_SIGNALING_PATHWAY	0.572131	0.833276	0.0623861	-0.369703	-0.933502	26	#3490dc	TGFb signaling
226	GOBP_NEGATIVE_REGULATION_OF_MYELOID_LEUKOCYTE_MEDIATED_IMMUNITY	0.583804	0.840438	0.0681513	-0.447603	-0.926163	11	#f66d9b	Hematopoietic
69	GOBP_REGULATION_OF_ERYTHROCYTE_DIFFERENTIATION	0.59375	0.847987	0.0583453	-0.323436	-0.921414	49	#ffed4a	Erythroid
52	GOMF_R_SMAD_BINDING	0.598063	0.850152	0.0797706	0.334148	0.904221	24	#3490dc	TGFb signaling
237	MP_INCREASED_CHRONIC_MYELOCYTIC_LEUKEMIA_INCIDENCE	0.613383	0.858485	0.0650878	-0.416906	-0.88495	12	#f66d9b	Hematopoietic
232	GOBP_REGULATION_OF_MYELOID_CELL_APOPTOTIC_PROCESS	0.617694	0.860706	0.057006	-0.332657	-0.902725	38	#f66d9b	Hematopoietic
98	GOBP_POSITIVE_REGULATION_OF_NEUTROPHIL_MIGRATION	0.620853	0.863062	0.0567672	-0.331614	-0.899896	38	#f6993f	Granulocytic
111	GOBP_HEMATOPOIETIC_PROGENITOR_CELL_DIFFERENTIATION	0.621232	0.86322	0.0481184	-0.279012	-0.92731	154	#38c172	Hematopoietic
57	GOMF_TRANSFORMING_GROWTH_FACTOR_BETA_RECEPTOR_BINDING	0.621392	0.863241	0.0601186	-0.35854	-0.888256	24	#3490dc	TGFb signaling
114	GOBP_HEMATOPOIETIC_STEM_CELL_MIGRATION	0.621469	0.863241	0.0650878	-0.428303	-0.886228	11	#38c172	Hematopoietic
78	GOBP_NEGATIVE_REGULATION_OF_NEUTROPHIL_MIGRATION	0.638889	0.871743	0.0699459	0.498871	0.87875	5	#f6993f	Granulocytic
171	GOBP_NEGATIVE_REGULATION_OF_MACROPHAGE_APOPTOTIC_PROCESS	0.638889	0.871743	0.0699459	0.500077	0.880873	5	#9561e2	Monocytic
178	GOBP_NEGATIVE_REGULATION_OF_MONOCYTE_CHEMOTAXIS	0.640449	0.87252	0.0633597	-0.496135	-0.873263	5	#9561e2	Monocytic
241	GOBP_NEGATIVE_REGULATION_OF_MEGAKARYOCYTE_DIFFERENTIATION	0.644211	0.874638	0.0687943	0.560468	0.877841	3	#4dc0b5	Thrombocytic
115	GOBP_HEMATOPOIETIC_STEM_CELL_MIGRATION_TO_BONE_MARROW	0.64794	0.874796	0.0628004	-0.492307	-0.866525	5	#38c172	Hematopoietic
123	GOBP_REGULATION_OF_HEMATOPOIETIC_STEM_CELL_PROLIFERATION	0.652681	0.875838	0.0732559	0.357934	0.863447	16	#38c172	Hematopoietic
93	GOBP_POSITIVE_REGULATION_OF_GRANULOCYTE_CHEMOTAXIS	0.661789	0.879296	0.0551352	-0.33655	-0.861751	28	#f6993f	Granulocytic
223	GOBP_NEGATIVE_REGULATION_OF_MYELOID_CELL_APOPTOTIC_PROCESS	0.662207	0.879296	0.0564118	-0.341647	-0.8475	23	#f66d9b	Hematopoietic
13	GOBP_NEGATIVE_REGULATION_OF_TRANSFORMING_GROWTH_FACTOR_BETA_PRODUCTION	0.662996	0.87963	0.0696133	0.368344	0.84944	13	#3490dc	TGFb signaling
15	GOBP_NON_CANONICAL_WNT_SIGNALING_PATHWAY_VIA_MAPK_CASCADE	0.666667	0.87963	0.0619763	-0.459469	-0.861736	7	#3490dc	TGFb signaling
116	GOBP_HEMATOPOIETIC_STEM_CELL_PROLIFERATION	0.672727	0.881885	0.0772747	0.298138	0.871286	36	#38c172	Hematopoietic
18	GOBP_POSITIVE_REGULATION_OF_ACTIVIN_RECEPTOR_SIGNALING_PATHWAY	0.675105	0.882589	0.0665892	0.391938	0.837027	10	#3490dc	TGFb signaling
137	GOBP_NEGATIVE_REGULATION_OF_MAST_CELL_ACTIVATION	0.675182	0.882589	0.0596037	-0.37687	-0.82198	13	#e3342f	Mast cell
121	GOBP_REGULATION_OF_HEMATOPOIETIC_PROGENITOR_CELL_DIFFERENTIATION	0.677266	0.882681	0.0530213	-0.314633	-0.859796	40	#38c172	Hematopoietic
127	GOBP_REGULATION_OF_LYMPHOID_PROGENITOR_CELL_DIFFERENTIATION	0.676136	0.882681	0.0613026	-0.421852	-0.852759	10	#6574cd	Lymphoid
1	GOBP_ACTIVIN_RECEPTOR_SIGNALING_PATHWAY	0.680578	0.883199	0.0532386	-0.314044	-0.862218	42	#3490dc	TGFb signaling
12	GOBP_NEGATIVE_REGULATION_OF_TRANSFORMING_GROWTH_FACTOR_BETA1_PRODUCTION	0.684989	0.886222	0.0659816	0.437019	0.817677	6	#3490dc	TGFb signaling
67	GOBP_POSITIVE_REGULATION_OF_ERYTHROCYTE_DIFFERENTIATION	0.687805	0.886952	0.0533478	-0.330076	-0.845174	28	#ffed4a	Erythroid
84	GOBP_NEUTROPHIL_DIFFERENTIATION	0.687382	0.886952	0.0602484	-0.403905	-0.835743	11	#f6993f	Granulocytic
194	GOBP_REGULATION_OF_MACROPHAGE_APOPTOTIC_PROCESS	0.6875	0.886952	0.0605093	-0.41351	-0.835897	10	#9561e2	Monocytic
61	GOBP_DEFINITIVE_ERYTHROCYTE_DIFFERENTIATION	0.692453	0.888852	0.0599892	-0.423584	-0.817943	8	#ffed4a	Erythroid
66	GOBP_NEGATIVE_REGULATION_OF_ERYTHROCYTE_DIFFERENTIATION	0.69181	0.888852	0.0664364	0.365869	0.824221	12	#ffed4a	Erythroid
192	GOBP_REGULATION_OF_CELLULAR_RESPONSE_TO_MACROPHAGE_COLONY_STIMULATING_FACTOR_STIMULUS	0.693446	0.889269	0.0653834	0.434567	0.813088	6	#9561e2	Monocytic
16	GOBP_P38MAPK_CASCADE	0.70195	0.893818	0.0787114	0.276205	0.872479	53	#3490dc	TGFb signaling
37	GOBP_TRANSFORMING_GROWTH_FACTOR_BETA1_PRODUCTION	0.702602	0.894365	0.0585938	-0.383285	-0.813583	12	#3490dc	TGFb signaling
105	GOBP_REGULATION_OF_NEUTROPHIL_EXTRAVASATION	0.707627	0.897377	0.0645031	0.404151	0.806874	8	#f6993f	Granulocytic
32	GOBP_REGULATION_OF_TRANSFORMING_GROWTH_FACTOR_BETA1_PRODUCTION	0.711864	0.899344	0.0585938	-0.391227	-0.809511	11	#3490dc	TGFb signaling
154	GOBP_MACROPHAGE_APOPTOTIC_PROCESS	0.719397	0.902229	0.0580984	-0.389961	-0.806892	11	#9561e2	Monocytic
209	GOBP_MYELOID_CELL_APOPTOTIC_PROCESS	0.723101	0.903784	0.0497903	-0.30238	-0.841502	44	#f66d9b	Hematopoietic
76	GOBP_NEGATIVE_REGULATION_OF_GRANULOCYTE_DIFFERENTIATION	0.729167	0.905532	0.0577309	-0.396833	-0.802185	10	#f6993f	Granulocytic
126	GOBP_MUCOSA_ASSOCIATED_LYMPHOID_TISSUE_DEVELOPMENT	0.735401	0.908145	0.0555947	-0.360286	-0.785811	13	#6574cd	Lymphoid
2	GOBP_COMMON_PARTNER_SMAD_PROTEIN_PHOSPHORYLATION	0.738397	0.908722	0.062249	0.392418	0.764917	7	#3490dc	TGFb signaling
177	GOBP_NEGATIVE_REGULATION_OF_MONOCYTE_CHEMOTACTIC_PROTEIN_1_PRODUCTION	0.73913	0.908722	0.057006	-0.438659	-0.79274	6	#9561e2	Monocytic
22	GOBP_POSITIVE_REGULATION_OF_P38MAPK_CASCADE	0.743089	0.910187	0.0497903	-0.317092	-0.811927	28	#3490dc	TGFb signaling
59	GOMF_TYPE_I_ACTIVIN_RECEPTOR_BINDING	0.74359	0.910187	0.0625237	0.447025	0.787423	5	#3490dc	TGFb signaling
157	GOBP_MACROPHAGE_COLONY_STIMULATING_FACTOR_SIGNALING_PATHWAY	0.756871	0.915717	0.0611693	0.402067	0.75228	6	#9561e2	Monocytic
252	GOBP_PLATELET_DERIVED_GROWTH_FACTOR_RECEPTOR_BETA_SIGNALING_PATHWAY	0.757895	0.916051	0.0523759	-0.344886	-0.770892	14	#4dc0b5	Thrombocytic
118	GOBP_NEGATIVE_REGULATION_OF_HEMATOPOIETIC_STEM_CELL_DIFFERENTIATION	0.762821	0.918451	0.0613026	0.438589	0.772564	5	#38c172	Hematopoietic
155	GOBP_MACROPHAGE_CHEMOTAXIS	0.772293	0.921288	0.04707	-0.297462	-0.8222	43	#9561e2	Monocytic
245	GOBP_PLATELET_ACTIVATING_FACTOR_BIOSYNTHETIC_PROCESS	0.782772	0.925513	0.0538979	-0.418592	-0.736777	5	#4dc0b5	Thrombocytic
168	GOBP_MONOCYTE_DIFFERENTIATION	0.8	0.932618	0.0464155	-0.302082	-0.773492	28	#9561e2	Monocytic
10	GOBP_NEGATIVE_REGULATION_OF_SMAD_PROTEIN_COMPLEX_ASSEMBLY	0.809886	0.937699	0.0530213	-0.432518	-0.716728	4	#3490dc	TGFb signaling
29	GOBP_REGULATION_OF_P38MAPK_CASCADE	0.810594	0.937699	0.0452247	-0.290292	-0.797006	42	#3490dc	TGFb signaling
184	GOBP_POSITIVE_REGULATION_OF_MACROPHAGE_DERIVED_FOAM_CELL_DIFFERENTIATION	0.849442	0.954994	0.0497903	-0.32455	-0.68891	12	#9561e2	Monocytic
107	GOBP_REGULATION_OF_NEUTROPHIL_MEDIATED_KILLING_OF_SYMBIONT_CELL	0.85206	0.955429	0.0499914	-0.382708	-0.673616	5	#f6993f	Granulocytic
205	GOBP_RESPONSE_TO_MACROPHAGE_COLONY_STIMULATING_FACTOR	0.852321	0.955429	0.0554793	0.3275	0.699412	10	#9561e2	Monocytic
172	GOBP_NEGATIVE_REGULATION_OF_MACROPHAGE_CHEMOTAXIS	0.868914	0.960545	0.049094	-0.370247	-0.651683	5	#9561e2	Monocytic
191	GOBP_POSITIVE_REGULATION_OF_MONOCYTE_DIFFERENTIATION	0.869811	0.960721	0.049391	-0.341553	-0.659539	8	#9561e2	Monocytic
30	GOBP_REGULATION_OF_SMAD_PROTEIN_COMPLEX_ASSEMBLY	0.891386	0.968284	0.0479259	-0.357623	-0.629463	5	#3490dc	TGFb signaling
50	GOMF_CO_SMAD_BINDING	0.907721	0.974794	0.0473534	-0.313369	-0.648411	11	#3490dc	TGFb signaling
11	GOBP_NEGATIVE_REGULATION_OF_SMAD_PROTEIN_SIGNAL_TRANSDUCTION	0.918561	0.97839	0.04707	-0.31318	-0.58737	7	#3490dc	TGFb signaling
9	GOBP_NEGATIVE_REGULATION_OF_PATHWAY_RESTRICTED_SMAD_PROTEIN_PHOSPHORYLATION	0.9375	0.985672	0.052057	0.261501	0.589103	12	#3490dc	TGFb signaling
38	GOBP_TRANSFORMING_GROWTH_FACTOR_BETA2_PRODUCTION	0.966229	0.997001	0.0443293	-0.270863	-0.533494	9	#3490dc	TGFb signaling
44	GOCC_HETEROMERIC_SMAD_PROTEIN_COMPLEX	0.979245	1	0.0439759	-0.253604	-0.48971	8	#3490dc	TGFb signaling
45	GOCC_SMAD_PROTEIN_COMPLEX	0.992424	1	0.0435378	-0.227646	-0.460179	10	#3490dc	TGFb signaling
106	GOBP_REGULATION_OF_NEUTROPHIL_MEDIATED_CYTOTOXICITY	0.992424	1	0.0435378	-0.227509	-0.426694	7	#f6993f	Granulocytic
120	GOBP_POSITIVE_REGULATION_OF_HEMATOPOIETIC_STEM_CELL_PROLIFERATION	0.993671	1	0.0484088	0.217669	0.464857	10	#38c172	Hematopoietic
